# Supplementary material for: Novel (+)-Neoisopulegol-Based O-Benzyl Derivatives as Antimicrobial Agents
Source: MDPI journal article supplement (doi:10.3390/ijms22115626), 2021-05-26
Supplement: s1 [file s1]

**Supporting informations  
for  
Novel (+)-neoisopulegol based- *O*-benzyl derivatives  
as antibacterial agents**

**Tam Minh Le <sup>1,2</sup>, Thu Huynh <sup>3,4,5</sup>, Fatima Zahra Bamou<sup>1</sup>, András Szekeres <sup>3,6</sup>, Ferenc Fülöp <sup>1,2</sup> and  
Zsolt Szakonyi <sup>1,6\*</sup>**

Institute of Pharmaceutical Chemistry, University of Szeged, Interdisciplinary Excellent Center, H-6720 Szeged,  
Eötvös utca 6, Hungary

<sup>2</sup> Stereochemistry Research Group of the Hungarian Academy of Sciences, H-6720 Szeged, Eötvös utca 6,  
Hungary

<sup>3</sup> Department of Microbiology, University of Szeged, 6726 Szeged, Közép fasor 52, Hungary

<sup>4</sup> Department of Biotechnology, Faculty of Chemical Engineering, Ho Chi Minh University of Technology  
(HCMUT), 72607, Ho Chi Minh City, District 10, 268 Ly Thuong Kiet Street, Vietnam

<sup>5</sup> Vietnam National University Ho Chi Minh City, 71351, Ho Chi Minh City, Thu Duc District, Linh Trung Ward,  
Vietnam

<sup>6</sup> Interdisciplinary Centre of Natural Products, University of Szeged, H-6720 Szeged, Eötvös utca 6, Hungary

\* Correspondence: szakonyi.zsolt@szte.hu; Tel.: +36-62-546809; Fax: +36-62-545705

## Contents

|                                                                  |           |
|------------------------------------------------------------------|-----------|
| 1. Complete results of antimicrobial activities                  | S3-S6     |
| 2. $^1\text{H}$ -, $^{13}\text{C}$ -NMR spectra of new compounds | S7-S140   |
| 3. Chiral GC chromatograms of (-)- and (+)-isopulegol            | S141-S142 |

**Table S1: Complete results of antimicrobial activities**

| RSD Inhibitory effect (%) $\pm$ (%) |                               |                                |                               |                            |                                   |                                |                              |
|-------------------------------------|-------------------------------|--------------------------------|-------------------------------|----------------------------|-----------------------------------|--------------------------------|------------------------------|
|                                     |                               | Gram positive                  |                               | Gram negative              |                                   | Yeast                          |                              |
| Analogue                            | Conc.<br>( $\mu\text{g/mL}$ ) | <i>B. subtilis</i><br>SZMC0209 | <i>S. aureus</i><br>SZMC14611 | <i>E. coli</i><br>SZMC6271 | <i>P. aeruginosa</i><br>SZMC23290 | <i>C. albicans</i><br>SZMC1533 | <i>C. krusei</i><br>SZMC1352 |
| Nystatin                            | 100                           | -                              | -                             | -                          | -                                 | 93.38 $\pm$ 2.13               | 92.01 $\pm$ 3.64             |
|                                     | 10                            | -                              | -                             | -                          | -                                 | 92.88 $\pm$ 10.18              | 58.00 $\pm$ 9.21             |
| Ampicillin                          | 100                           | 95.22 $\pm$ 8.40               | 81.88 $\pm$ 8.99              | 94.07 $\pm$ 3.61           | 29.03 $\pm$ 2.06                  | -                              | -                            |
|                                     | 10                            | 93.00 $\pm$ 3.20               | 70.37 $\pm$ 6.15              | 89.37 $\pm$ 0.39           | 5.36 $\pm$ 8.32                   | -                              | -                            |
| 3                                   | 100                           | 97.60 $\pm$ 6.42               | 57.57 $\pm$ 9.93              | 26.50 $\pm$ 2.28           | 49.10 $\pm$ 7.52                  | 9.38 $\pm$ 7.95                | -                            |
|                                     | 10                            | 59.58 $\pm$ 8.06               | 10.75 $\pm$ 5.41              | 24.19 $\pm$ 3.99           | 33.91 $\pm$ 10.35                 | 5.22 $\pm$ 6.73                | -                            |
| 5a                                  | 100                           | 92.82 $\pm$ 4.69               | 80.07 $\pm$ 2.21              | 38.70 $\pm$ 5.87           | 54.06 $\pm$ 9.08                  | 91.56 $\pm$ 1.27               | 94.88 $\pm$ 2.18             |
|                                     | 10                            | 48.25 $\pm$ 6.16               | -                             | 24.67 $\pm$ 1.84           | 26.68 $\pm$ 5.56                  | 8.67 $\pm$ 3.99                | -                            |
| 5b                                  | 100                           | 86.35 $\pm$ 1.88               | 71.48 $\pm$ 1.28              | 29.58 $\pm$ 0.18           | 46.66 $\pm$ 1.37                  | 92.88 $\pm$ 2.63               | 93.62 $\pm$ 0.80             |
|                                     | 10                            | 23.23 $\pm$ 3.15               | -                             | 16.80 $\pm$ 2.82           | 6.19 $\pm$ 1.77                   | -                              | -                            |
| 6a                                  | 100                           | -                              | -                             | 13.63 $\pm$ 0.90           | 4.07 $\pm$ 5.69                   | -                              | 32.04 $\pm$ 1.45             |
|                                     | 10                            | -                              | -                             | 14.28 $\pm$ 3.11           | -                                 | -                              | 0.16 $\pm$ 28.77             |
| 6b                                  | 100                           | -                              | 6.78 $\pm$ 3.84               | 23.07 $\pm$ 3.03           | -                                 | 7.32 $\pm$ 1.18                | -                            |
|                                     | 10                            | -                              | -                             | 18.66 $\pm$ 2.08           | 0.52 $\pm$ 8.77                   | 6.35 $\pm$ 1.81                | -                            |
| 7a                                  | 100                           | 81.51 $\pm$ 4.73               | 70.66 $\pm$ 0.91              | 9.10 $\pm$ 1.86            | -                                 | 87.90 $\pm$ 10.46              | -                            |
|                                     | 10                            | -                              | -                             | 9.82 $\pm$ 8.12            | -                                 | 2.24 $\pm$ 5.95                | -                            |
| 7b                                  | 100                           | 95.34 $\pm$ 4.81               | 92.34 $\pm$ 1.32              | 23.19 $\pm$ 0.21           | 41.59 $\pm$ 3.53                  | 22.68 $\pm$ 8.67               | 29.02 $\pm$ 4.69             |
|                                     | 10                            | 50.00 $\pm$ 7.21               | 2.69 $\pm$ 2.48               | 21.21 $\pm$ 6.20           | 29.09 $\pm$ 1.97                  | 6.60 $\pm$ 1.65                | -                            |
| 8a                                  | 100                           | 49.17 $\pm$ 2.41               | 3.62 $\pm$ 1.47               | 11.73 $\pm$ 2.01           | 47.26 $\pm$ 2.69                  | 17.96 $\pm$ 1.27               | -                            |
|                                     | 10                            | 35.67 $\pm$ 4.38               | 2.45 $\pm$ 1.08               | 16.13 $\pm$ 3.04           | 38.18 $\pm$ 2.16                  | 7.64 $\pm$ 0.46                | 7.56 $\pm$ 38.36             |
| 8b                                  | 100                           | 29.88 $\pm$ 4.78               | -                             | -                          | 40.81 $\pm$ 2.35                  | 14.63 $\pm$ 0.25               | -                            |
|                                     | 10                            | 18.40 $\pm$ 2.09               | -                             | 9.06 $\pm$ 0.85            | 35.05 $\pm$ 3.94                  | -                              | -                            |
| 9a                                  | 100                           | 52.37 $\pm$ 5.19               | -                             | 16.94 $\pm$ 4.24           | 29.26 $\pm$ 1.31                  | 7.58 $\pm$ 1.85                | -                            |
|                                     | 10                            | -                              | -                             | 12.39 $\pm$ 4.49           | 8.37 $\pm$ 6.25                   | 4.81 $\pm$ 2.74                | -                            |
| 9b                                  | 100                           | 51.60 $\pm$ 10.30              | -                             | 13.92 $\pm$ 0.87           | 4.13 $\pm$ 1.12                   | 2.33 $\pm$ 1.21                | 4.90 $\pm$ 49.13             |
|                                     | 10                            | 38.16 $\pm$ 3.93               | -                             | 12.08 $\pm$ 1.48           | -                                 | 2.76 $\pm$ 1.08                | -                            |
| 10                                  | 100                           | 95.16 $\pm$ 2.81               | 90.71 $\pm$ 3.27              | 25.74 $\pm$ 4.75           | 50.87 $\pm$ 9.72                  | 95.91 $\pm$ 16.31              | -                            |
|                                     | 10                            | 55.43 $\pm$ 15.48              | -                             | 16.90 $\pm$ 2.19           | 44.05 $\pm$ 7.57                  | 6.57 $\pm$ 3.05                | -                            |
| 12a                                 | 100                           | 95.16 $\pm$ 6.46               | 2.81 $\pm$ 6.51               | 24.95 $\pm$ 4.61           | 70.85 $\pm$ 6.49                  | 95.83 $\pm$ 11.18              | -                            |
|                                     | 10                            | 73.41 $\pm$ 5.45               | -                             | 17.14 $\pm$ 4.41           | 47.81 $\pm$ 7.92                  | 9.34 $\pm$ 5.24                | -                            |
| 12b                                 | 100                           | 91.84 $\pm$ 6.01               | 83.11 $\pm$ 2.61              | 50.07 $\pm$ 10.97          | 75.84 $\pm$ 7.14                  | 94.50 $\pm$ 0.97               | 67.59 $\pm$ 16.45            |
|                                     | 10                            | 32.17 $\pm$ 11.19              | -                             | 14.39 $\pm$ 4.75           | 58.24 $\pm$ 4.20                  | 2.44 $\pm$ 2.28                | -                            |
| 13a                                 | 100                           | 6.59 $\pm$ 2.79                | -                             | -                          | 21.30 $\pm$ 6.68                  | -                              | -                            |
|                                     | 10                            | -                              | -                             | 10.01 $\pm$ 7.48           | -                                 | 1.83 $\pm$ 4.80                | -                            |
| 13b                                 | 100                           | 51.10 $\pm$ 12.82              | -                             | 12.30 $\pm$ 3.93           | 48.58 $\pm$ 1.33                  | 5.66 $\pm$ 2.32                | -                            |
|                                     | 10                            | 45.85 $\pm$ 4.38               | -                             | 11.82 $\pm$ 9.78           | 47.75 $\pm$ 2.01                  | 5.68 $\pm$ 3.59                | -                            |
| 14a                                 | 100                           | 92.67 $\pm$ 3.90               | 82.35 $\pm$ 3.19              | 6.48 $\pm$ 0.00            | 52.97 $\pm$ 7.47                  | 2.69 $\pm$ 2.37                | -                            |

| RSD Inhibitory effect (%) $\pm$ (%) |                               |                                |                               |                            |                                   |                                |                              |
|-------------------------------------|-------------------------------|--------------------------------|-------------------------------|----------------------------|-----------------------------------|--------------------------------|------------------------------|
|                                     |                               | Gram positive                  |                               | Gram negative              |                                   | Yeast                          |                              |
| Analogue                            | Conc.<br>( $\mu\text{g/mL}$ ) | <i>B. subtilis</i><br>SZMC0209 | <i>S. aureus</i><br>SZMC14611 | <i>E. coli</i><br>SZMC6271 | <i>P. aeruginosa</i><br>SZMC23290 | <i>C. albicans</i><br>SZMC1533 | <i>C. krusei</i><br>SZMC1352 |
|                                     | 10                            | -                              | 1.87 $\pm$ 6.30               | 12.92 $\pm$ 5.21           | 44.00 $\pm$ 1.32                  | 0.09 $\pm$ 5.55                | -                            |
| 15a                                 | 100                           | 38.49 $\pm$ 6.18               | -                             | 3.57 $\pm$ 2.04            | 56.86 $\pm$ 11.05                 | 6.66 $\pm$ 5.02                | -                            |
|                                     | 10                            | 7.77 $\pm$ 34.76               | -                             | 17.28 $\pm$ 0.91           | 44.31 $\pm$ 4.75                  | 6.53 $\pm$ 3.65                | -                            |
| 16a                                 | 100                           | -                              | -                             | 2.34 $\pm$ 5.51            | 28.43 $\pm$ 2.27                  | -                              | -                            |
|                                     | 10                            | -                              | -                             | 8.51 $\pm$ 8.10            | 24.45 $\pm$ 1.41                  | -                              | 4.53 $\pm$ 20.51             |
| 16b                                 | 100                           | 3.09 $\pm$ 24.95               | 5.55 $\pm$ 5.25               | 24.29 $\pm$ 0.82           | 44.60 $\pm$ 6.69                  | 1.14 $\pm$ 2.76                | -                            |
|                                     | 10                            | -                              | 7.25 $\pm$ 5.79               | 15.09 $\pm$ 0.78           | 36.77 $\pm$ 11.02                 | 3.42 $\pm$ 1.50                | 4.64 $\pm$ 54.48             |
| 18a                                 | 100                           | -                              | -                             | 16.80 $\pm$ 0.79           | 16.54 $\pm$ 1.30                  | -                              | -                            |
|                                     | 10                            | -                              | -                             | 11.94 $\pm$ 0.25           | 17.34 $\pm$ 3.26                  | -                              | 0.74 $\pm$ 48.92             |
| 20a                                 | 100                           | 84.57 $\pm$ 3.18               | 70.13 $\pm$ 0.90              | 22.02 $\pm$ 2.97           | -                                 | 91.35 $\pm$ 1.07               | -                            |
|                                     | 10                            | 89.70 $\pm$ 1.32               | 65.81 $\pm$ 0.51              | 2.36 $\pm$ 2.13            | -                                 | 6.76 $\pm$ 8.04                | 14.72 $\pm$ 10.68            |
| 20b                                 | 100                           | 78.34 $\pm$ 2.51               | 69.49 $\pm$ 0.57              | 22.78 $\pm$ 3.27           | -                                 | 90.74 $\pm$ 2.90               | 79.88 $\pm$ 3.39             |
|                                     | 10                            | 78.43 $\pm$ 5.39               | 61.84 $\pm$ 0.27              | 17.87 $\pm$ 3.01           | -                                 | 80.54 $\pm$ 17.23              | -                            |
| 21a                                 | 100                           | 53.71 $\pm$ 2.83               | 8.71 $\pm$ 2.58               | 15.80 $\pm$ 1.19           | 35.11 $\pm$ 6.17                  | 5.54 $\pm$ 4.07                | -                            |
|                                     | 10                            | -                              | -                             | 14.35 $\pm$ 3.99           | 25.39 $\pm$ 9.90                  | 1.92 $\pm$ 4.53                | -                            |
| 21b                                 | 100                           | 15.01 $\pm$ 3.04               | 10.23 $\pm$ 2.37              | 7.27 $\pm$ 2.34            | 33.25 $\pm$ 1.72                  | 7.85 $\pm$ 4.93                | -                            |
|                                     | 10                            | -                              | -                             | 4.58 $\pm$ 8.16            | 24.48 $\pm$ 10.32                 | -                              | -                            |
| 22a                                 | 100                           | 83.44 $\pm$ 20.97              | 76.39 $\pm$ 1.13              | 10.96 $\pm$ 0.90           | 32.16 $\pm$ 8.18                  | 37.72 $\pm$ 8.39               | 27.69 $\pm$ 8.00             |
|                                     | 10                            | 81.63 $\pm$ 1.22               | 70.02 $\pm$ 1.01              | 4.10 $\pm$ 2.99            | -                                 | 5.78 $\pm$ 4.38                | -                            |
| 22b                                 | 100                           | 78.43 $\pm$ 10.14              | 60.32 $\pm$ 1.11              | 2.91 $\pm$ 1.54            | 20.72 $\pm$ 4.93                  | 81.97 $\pm$ 4.00               | -                            |
|                                     | 10                            | 81.01 $\pm$ 1.08               | 62.77 $\pm$ 0.27              | 4.19 $\pm$ 3.55            | -                                 | 61.02 $\pm$ 6.51               | -                            |
| 23a                                 | 100                           | 73.83 $\pm$ 4.14               | 73.99 $\pm$ 5.15              | 16.44 $\pm$ 0.57           | 47.92 $\pm$ 1.67                  | 9.17 $\pm$ 1.39                | -                            |
|                                     | 10                            | 83.29 $\pm$ 5.94               | 2.51 $\pm$ 3.47               | 18.28 $\pm$ 13.03          | 47.78 $\pm$ 3.40                  | 8.54 $\pm$ 3.44                | -                            |
| 23b                                 | 100                           | 75.64 $\pm$ 0.21               | 71.95 $\pm$ 4.38              | 3.41 $\pm$ 2.52            | 46.03 $\pm$ 2.10                  | 6.30 $\pm$ 0.86                | -                            |
|                                     | 10                            | 77.54 $\pm$ 5.94               | -                             | -                          | 42.22 $\pm$ 1.49                  | 4.17 $\pm$ 2.49                | -                            |
| 18b                                 | 100                           | 57.36 $\pm$ 4.28               | -                             | 8.22 $\pm$ 1.06            | -                                 | 22.57 $\pm$ 6.29               | -                            |
|                                     | 10                            | -                              | -                             | 2.74 $\pm$ 0.40            | 0.34 $\pm$ 28.88                  | -                              | -                            |
| 25a                                 | 100                           | 78.96 $\pm$ 0.88               | -                             | 10.51 $\pm$ 1.91           | -                                 | -                              | -                            |
|                                     | 10                            | -                              | -                             | 6.32 $\pm$ 2.1             | -                                 | -                              | -                            |
| 25b                                 | 100                           | 42.11 $\pm$ 10.10              | 3.04 $\pm$ 2.13               | 11.20 $\pm$ 2.31           | 35.40 $\pm$ 10.64                 | 5.25 $\pm$ 0.90                | -                            |
|                                     | 10                            | -                              | 3.51 $\pm$ 5.19               | 10.75 $\pm$ 5.28           | 37.23 $\pm$ 7.38                  | 2.01 $\pm$ 3.69                | -                            |
| 26a                                 | 100                           | -                              | 5.14 $\pm$ 4.72               | 1.62 $\pm$ 4.90            | 36.60 $\pm$ 4.48                  | 2.42 $\pm$ 1.77                | -                            |
|                                     | 10                            | -                              | -                             | -                          | 33.48 $\pm$ 4.53                  | -                              | -                            |
| 26b                                 | 100                           | -                              | -                             | -                          | 33.56 $\pm$ 4.72                  | -                              | -                            |
|                                     | 10                            | -                              | -                             | 4.65 $\pm$ 0.86            | 33.94 $\pm$ 9.15                  | -                              | 9.56 $\pm$ 14.00             |
| 27a                                 | 100                           | 71.13 $\pm$ 4.78               | -                             | 13.32 $\pm$ 2.05           | 43.48 $\pm$ 3.42                  | 27.31 $\pm$ 7.74               | -                            |
|                                     | 10                            | -                              | -                             | 9.39 $\pm$ 5.34            | 38.95 $\pm$ 9.32                  | 2.69 $\pm$ 6.48                | -                            |
| 27b                                 | 100                           | -                              | -                             | 0.86 $\pm$ 8.18            | 34.19 $\pm$ 6.00                  | 80.58 $\pm$ 12.34              | -                            |
|                                     | 10                            | -                              | -                             | 2.29 $\pm$ 4.70            | 33.16 $\pm$ 8.01                  | 24.80 $\pm$ 4.83               | -                            |
| 28a                                 | 100                           | 58.49 $\pm$ 1.06               | -                             | 3.77 $\pm$ 6.14            | 26.28 $\pm$ 2.93                  | 64.44 $\pm$ 8.94               | -                            |

| RSD Inhibitory effect (%) $\pm$ (%) |                               |                                |                               |                            |                                   |                                |                              |
|-------------------------------------|-------------------------------|--------------------------------|-------------------------------|----------------------------|-----------------------------------|--------------------------------|------------------------------|
|                                     |                               | Gram positive                  |                               | Gram negative              |                                   | Yeast                          |                              |
| Analogue                            | Conc.<br>( $\mu\text{g/mL}$ ) | <i>B. subtilis</i><br>SZMC0209 | <i>S. aureus</i><br>SZMC14611 | <i>E. coli</i><br>SZMC6271 | <i>P. aeruginosa</i><br>SZMC23290 | <i>C. albicans</i><br>SZMC1533 | <i>C. krusei</i><br>SZMC1352 |
|                                     | 10                            | -                              | -                             | $9.75 \pm 0.64$            | $26.51 \pm 0.64$                  | -                              | $6.49 \pm 21.22$             |
| 28b                                 | 100                           | $67.24 \pm 9.14$               | -                             | $12.63 \pm 9.33$           | $27.89 \pm 0.56$                  | $41.19 \pm 9.83$               | $14.84 \pm 6.96$             |
|                                     | 10                            | $0.30 \pm 11.11$               | $2.51 \pm 4.71$               | $10.13 \pm 6.13$           | $26.11 \pm 3.08$                  | $17.80 \pm 4.06$               | -                            |
| 30b                                 | 100                           | $17.74 \pm 6.94$               | -                             | -                          | -                                 | $0.96 \pm 1.11$                | $27.46 \pm 3.59$             |
|                                     | 10                            | -                              | -                             | -                          | -                                 | -                              | -                            |
| 31a                                 | 100                           | $95.13 \pm 9.21$               | $82.58 \pm 10.08$             | $30.12 \pm 0.97$           | $48.38 \pm 1.94$                  | $17.28 \pm 7.99$               | -                            |
|                                     | 10                            | $12.76 \pm 9.95$               | $13.68 \pm 5.80$              | $24.59 \pm 3.59$           | $32.10 \pm 3.98$                  | $1.69 \pm 0.64$                | $28.20 \pm 1.39$             |
| 31b                                 | 100                           | $93.89 \pm 5.51$               | $86.85 \pm 4.00$              | $23.33 \pm 2.01$           | $53.31 \pm 4.84$                  | $95.21 \pm 3.59$               | $38.27 \pm 2.37$             |
|                                     | 10                            | $47.83 \pm 9.92$               | -                             | $13.89 \pm 2.43$           | $47.81 \pm 6.60$                  | $6.76 \pm 0.58$                | -                            |
| 32a                                 | 100                           | $39.97 \pm 6.05$               | -                             | $9.06 \pm 0.93$            | $33.08 \pm 5.20$                  | $14.04 \pm 4.77$               | -                            |
|                                     | 10                            | $8.61 \pm 8.01$                | -                             | $12.18 \pm 4.13$           | $22.81 \pm 3.94$                  | -                              | $5.10 \pm 40.80$             |
| 32b                                 | 100                           | $41.93 \pm 6.93$               | -                             | $7.84 \pm 5.50$            | $37.43 \pm 2.96$                  | $14.38 \pm 3.07$               | -                            |
|                                     | 10                            | $1.19 \pm 15.68$               | -                             | $9.10 \pm 1.81$            | $22.01 \pm 4.78$                  | -                              | -                            |
| 34a                                 | 100                           | -                              | -                             | $1.05 \pm 1.01$            | $23.82 \pm 8.60$                  | -                              | -                            |
|                                     | 10                            | -                              | -                             | $8.56 \pm 0.59$            | $27.34 \pm 2.69$                  | -                              | -                            |
| 35a                                 | 100                           | $69.20 \pm 0.76$               | $12.92 \pm 7.01$              | $13.23 \pm 3.67$           | $24.51 \pm 9.67$                  | -                              | -                            |
|                                     | 10                            | -                              | -                             | $10.41 \pm 0.37$           | $22.04 \pm 3.36$                  | -                              | $11.48 \pm 9.50$             |
| 35b                                 | 100                           | -                              | $7.07 \pm 2.14$               | $21.90 \pm 0.11$           | $32.59 \pm 4.02$                  | $3.95 \pm 4.36$                | $2.26 \pm 48.23$             |
|                                     | 10                            | -                              | -                             | $11.01 \pm 4.49$           | $31.38 \pm 7.59$                  | $14.47 \pm 11.24$              | $8.57 \pm 38.32$             |
| 36a                                 | 100                           | $51.90 \pm 14.00$              | -                             | $14.16 \pm 1.44$           | $36.89 \pm 4.71$                  | $3.61 \pm 0.15$                | -                            |
|                                     | 10                            | $0.83 \pm 5.73$                | $2.69 \pm 2.36$               | $13.04 \pm 1.52$           | $38.44 \pm 5.81$                  | -                              | $15.49 \pm 9.99$             |
| 36b                                 | 100                           | -                              | -                             | $6.91 \pm 2.33$            | $29.23 \pm 4.53$                  | $48.67 \pm 1.97$               | -                            |
|                                     | 10                            | -                              | -                             | $5.53 \pm 6.56$            | $5.04 \pm 6.13$                   | $14.42 \pm 6.02$               | -                            |
| 38a                                 | 100                           | -                              | $2.05 \pm 1.05$               | $1.86 \pm 2.39$            | -                                 | $4.00 \pm 4.96$                | -                            |
|                                     | 10                            | -                              | -                             | $7.34 \pm 3.49$            | -                                 | $1.69 \pm 0.89$                | $1.85 \pm 50.46$             |
| 38b                                 | 100                           | $40.89 \pm 6.41$               | $5.08 \pm 1.72$               | $6.53 \pm 1.79$            | -                                 | -                              | $1.76 \pm 48.50$             |
|                                     | 10                            | -                              | -                             | $6.24 \pm 3.32$            | $1.15 \pm 10.83$                  | -                              | $3.57 \pm 46.50$             |
| 39a                                 | 100                           | $79.38 \pm 4.19$               | $63.47 \pm 4.90$              | $15.94 \pm 1.38$           | -                                 | $88.22 \pm 3.96$               | $20.44 \pm 22.00$            |
|                                     | 10                            | $82.73 \pm 0.52$               | $69.84 \pm 0.00$              | $10.37 \pm 1.56$           | -                                 | -                              | -                            |
| 39b                                 | 100                           | $87.80 \pm 7.04$               | $79.66 \pm 2.59$              | $12.08 \pm 4.28$           | $48.09 \pm 1.38$                  | $90.89 \pm 13.31$              | $91.08 \pm 4.90$             |
|                                     | 10                            | $92.94 \pm 1.46$               | $83.69 \pm 38.18$             | $16.37 \pm 2.25$           | $33.59 \pm 6.43$                  | $85.10 \pm 9.56$               | -                            |
| 40a                                 | 100                           | $72.88 \pm 1.68$               | $68.26 \pm 1.66$              | $12.75 \pm 0.66$           | $37.66 \pm 2.39$                  | $1.07 \pm 2.07$                | $13.12 \pm 35.38$            |
|                                     | 10                            | $55.43 \pm 5.07$               | -                             | $1.14 \pm 14.60$           | $38.89 \pm 1.13$                  | $7.90 \pm 3.78$                | -                            |
| 40b                                 | 100                           | $71.39 \pm 3.84$               | $69.37 \pm 1.44$              | $3.81 \pm 7.29$            | $42.13 \pm 2.25$                  | $9.22 \pm 1.99$                | -                            |
|                                     | 10                            | $65.82 \pm 4.56$               | $12.39 \pm 1.50$              | $5.08 \pm 0.44$            | $39.58 \pm 0.73$                  | $16.79 \pm 6.53$               | -                            |
| 41a                                 | 100                           | $20.92 \pm 4.79$               | -                             | $7.53 \pm 1.10$            | -                                 | -                              | -                            |
|                                     | 10                            | -                              | -                             | $5.55 \pm 2.23$            | -                                 | -                              | $9.76 \pm 13.24$             |
| 41b                                 | 100                           | -                              | -                             | $22.59 \pm 1.73$           | $29.69 \pm 7.98$                  | $8.01 \pm 0.15$                | $12.17 \pm 13.52$            |
|                                     | 10                            | $6.94 \pm 12.97$               | -                             | $21.97 \pm 1.20$           | $24.05 \pm 3.11$                  | $7.78 \pm 0.59$                | $13.86 \pm 12.14$            |
| 42a                                 | 100                           | $69.05 \pm 10.02$              | $5.79 \pm 6.44$               | $11.70 \pm 2.09$           | $26.71 \pm 7.59$                  | $3.20 \pm 0.25$                | -                            |

| RSD Inhibitory effect (%) ± (%) |                  |                                |                               |                            |                                   |                                |                              |
|---------------------------------|------------------|--------------------------------|-------------------------------|----------------------------|-----------------------------------|--------------------------------|------------------------------|
|                                 |                  | Gram positive                  |                               | Gram negative              |                                   | Yeast                          |                              |
| Analogue                        | Conc.<br>(µg/mL) | <i>B. subtilis</i><br>SZMC0209 | <i>S. aureus</i><br>SZMC14611 | <i>E. coli</i><br>SZMC6271 | <i>P. aeruginosa</i><br>SZMC23290 | <i>C. albicans</i><br>SZMC1533 | <i>C. krusei</i><br>SZMC1352 |
|                                 | 10               | 51.75 ± 11.13                  | -                             | 10.30 ± 10.48              | 25.65 ± 4.83                      | 1.12 ± 2.51                    | -                            |
| 42b                             | 100              | 86.62 ± 8.48                   | 66.22 ± 4.03                  | 11.13 ± 1.43               | 26.31 ± 3.55                      | 30.69 ± 3.51                   | 32.51 ± 8.51                 |
|                                 | 10               | 43.95 ± 5.65                   | -                             | 8.70 ± 5.49                | 12.78 ± 2.95                      | -                              | 16.64 ± 7.37                 |
| 43a                             | 100              | 41.19 ± 1.97                   | -                             | 2.57 ± 10.50               | -                                 | 5.02 ± 2.65                    | -                            |
|                                 | 10               | -                              | -                             | 8.44 ± 0.73                | 9.86 ± 4.63                       | -                              | -                            |
| 43b                             | 100              | 4.63 ± 24.25                   | -                             | 25.00 ± 4.39               | 20.61 ± 4.03                      | 80.90 ± 4.76                   | 18.34 ± 20.72                |
|                                 | 10               | -                              | -                             | 15.68 ± 1.68               | 8.48 ± 3.77                       | 20.45 ± 13.47                  | -                            |

# <sup>1</sup>H- and <sup>13</sup>C-NMR spectra of new compounds

Figure S 1: <sup>1</sup>H-NMR of compound 3

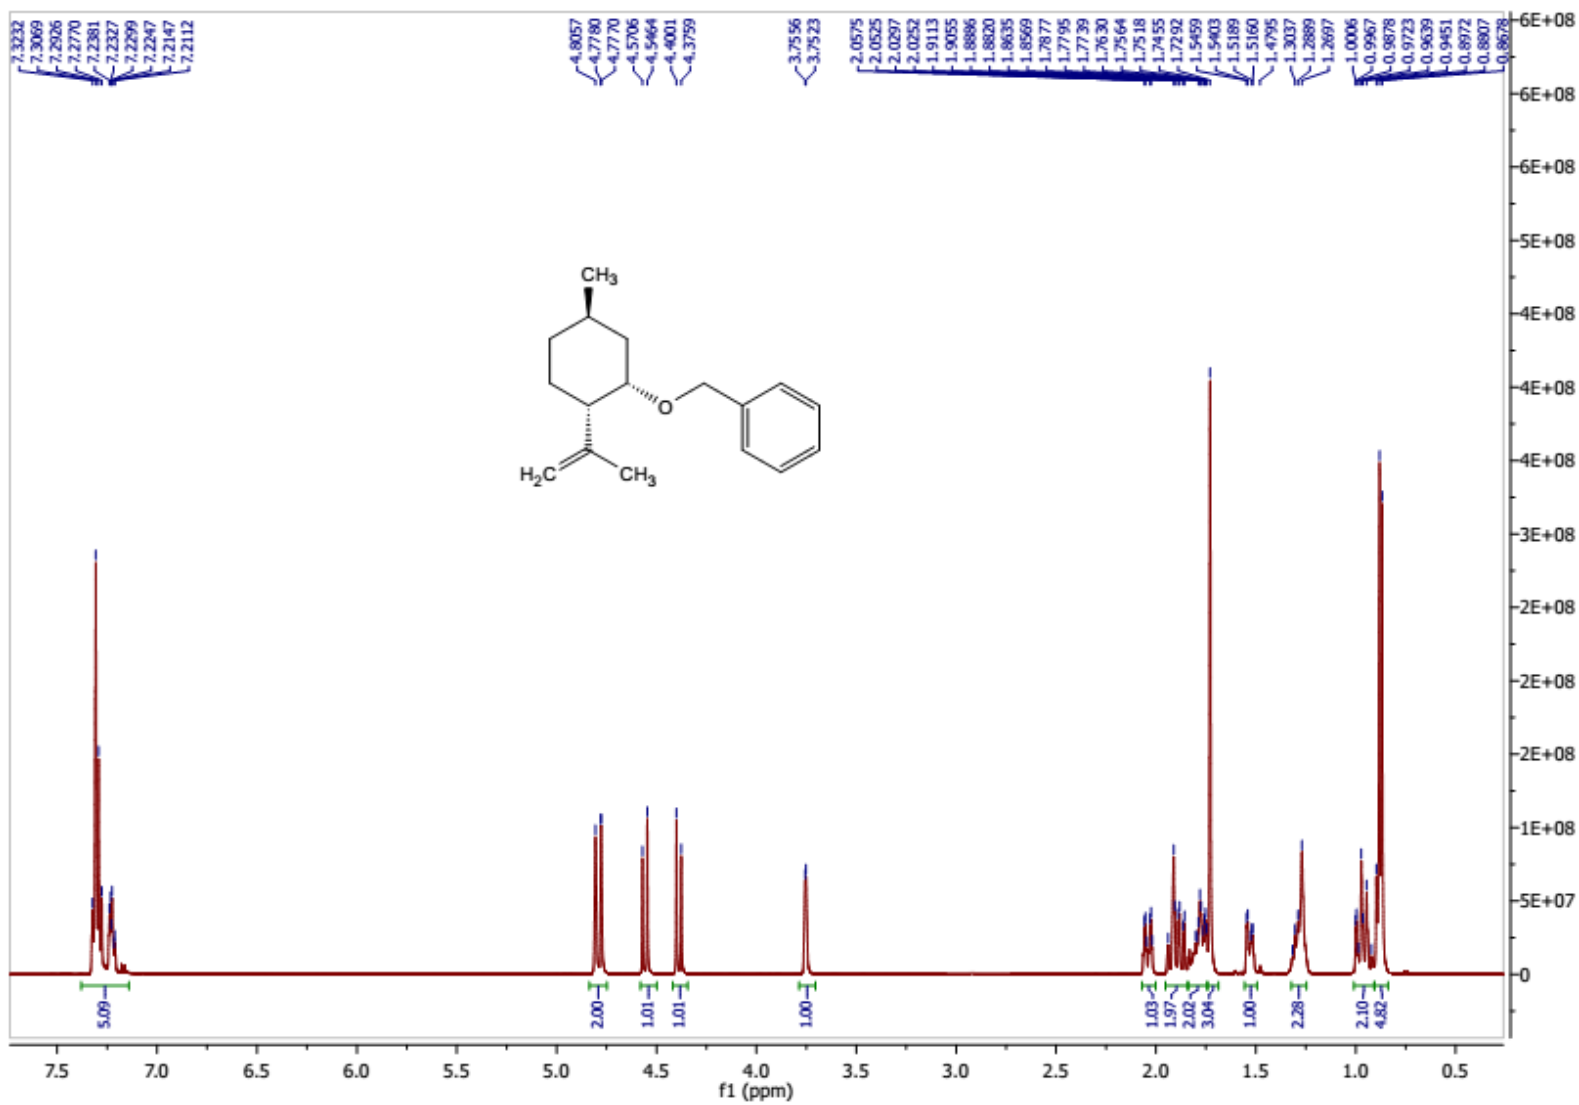

Figure S 2:  $^{13}\text{C}$ -NMR of compound **3**

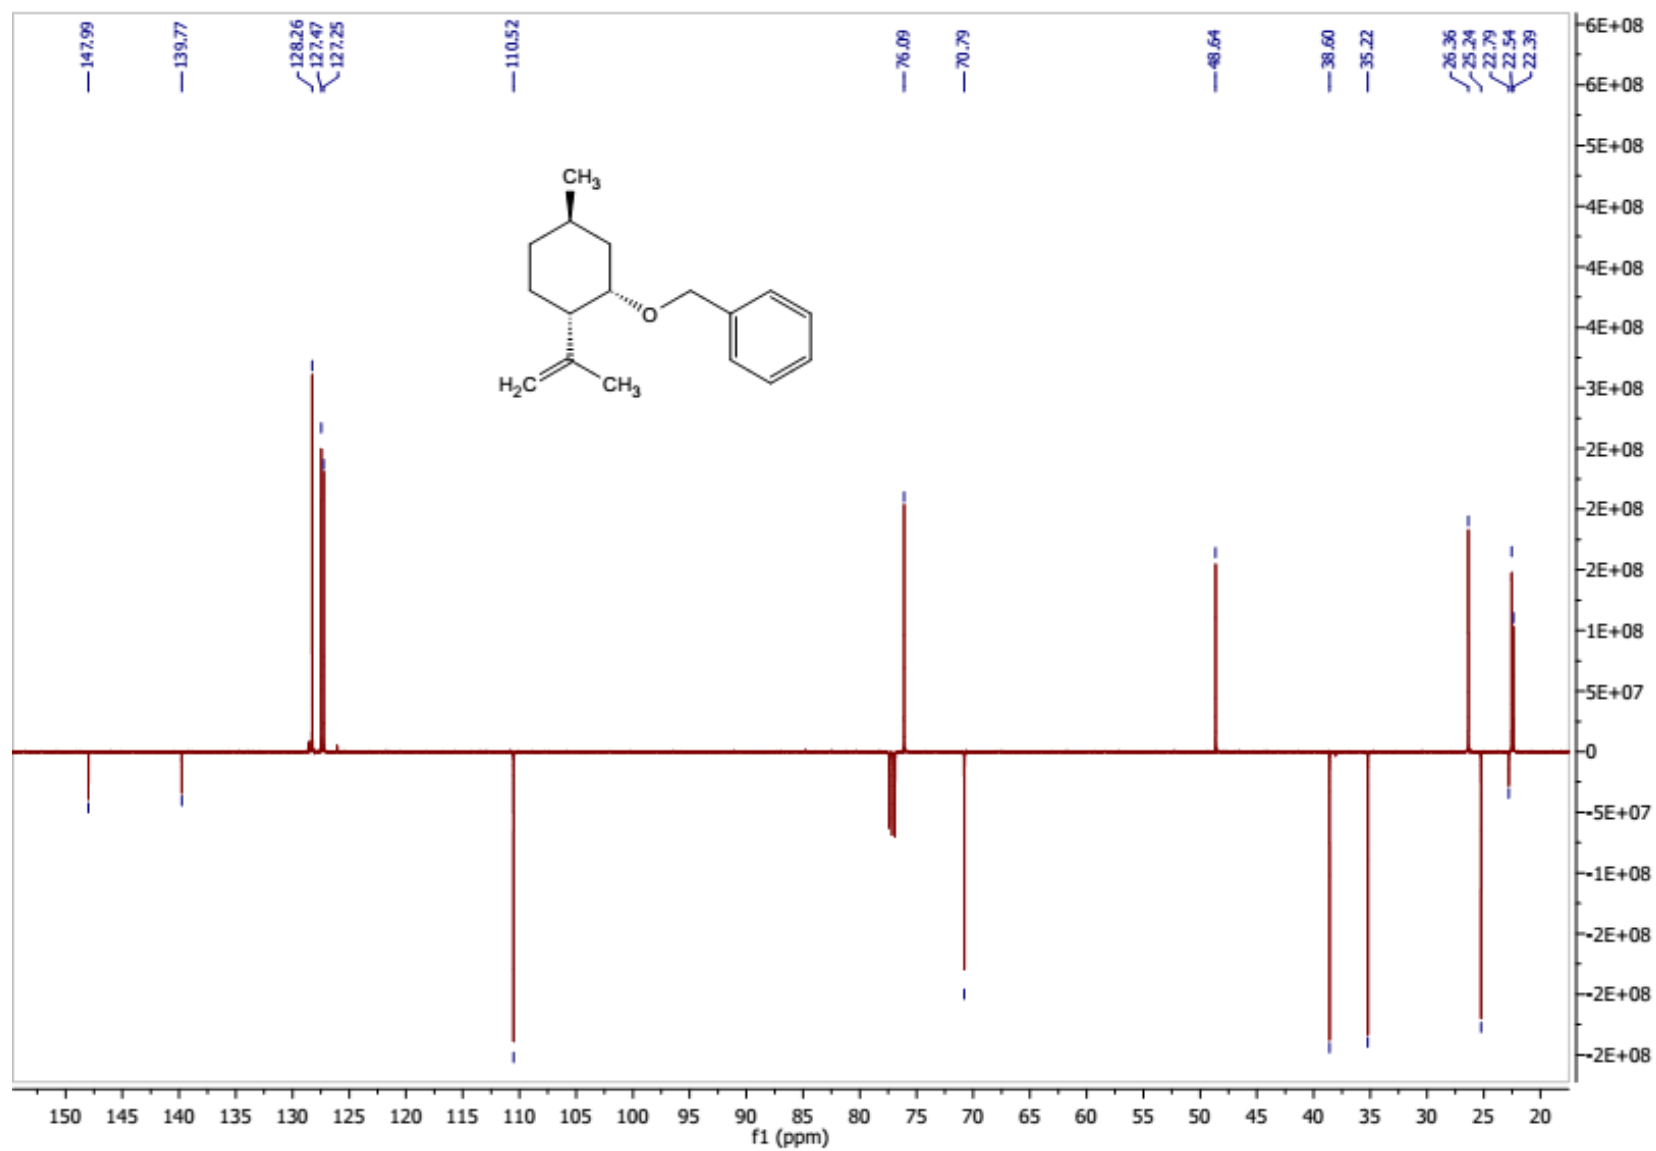



Figure S 3:  $^1\text{H}$ -NMR of compound **4a**

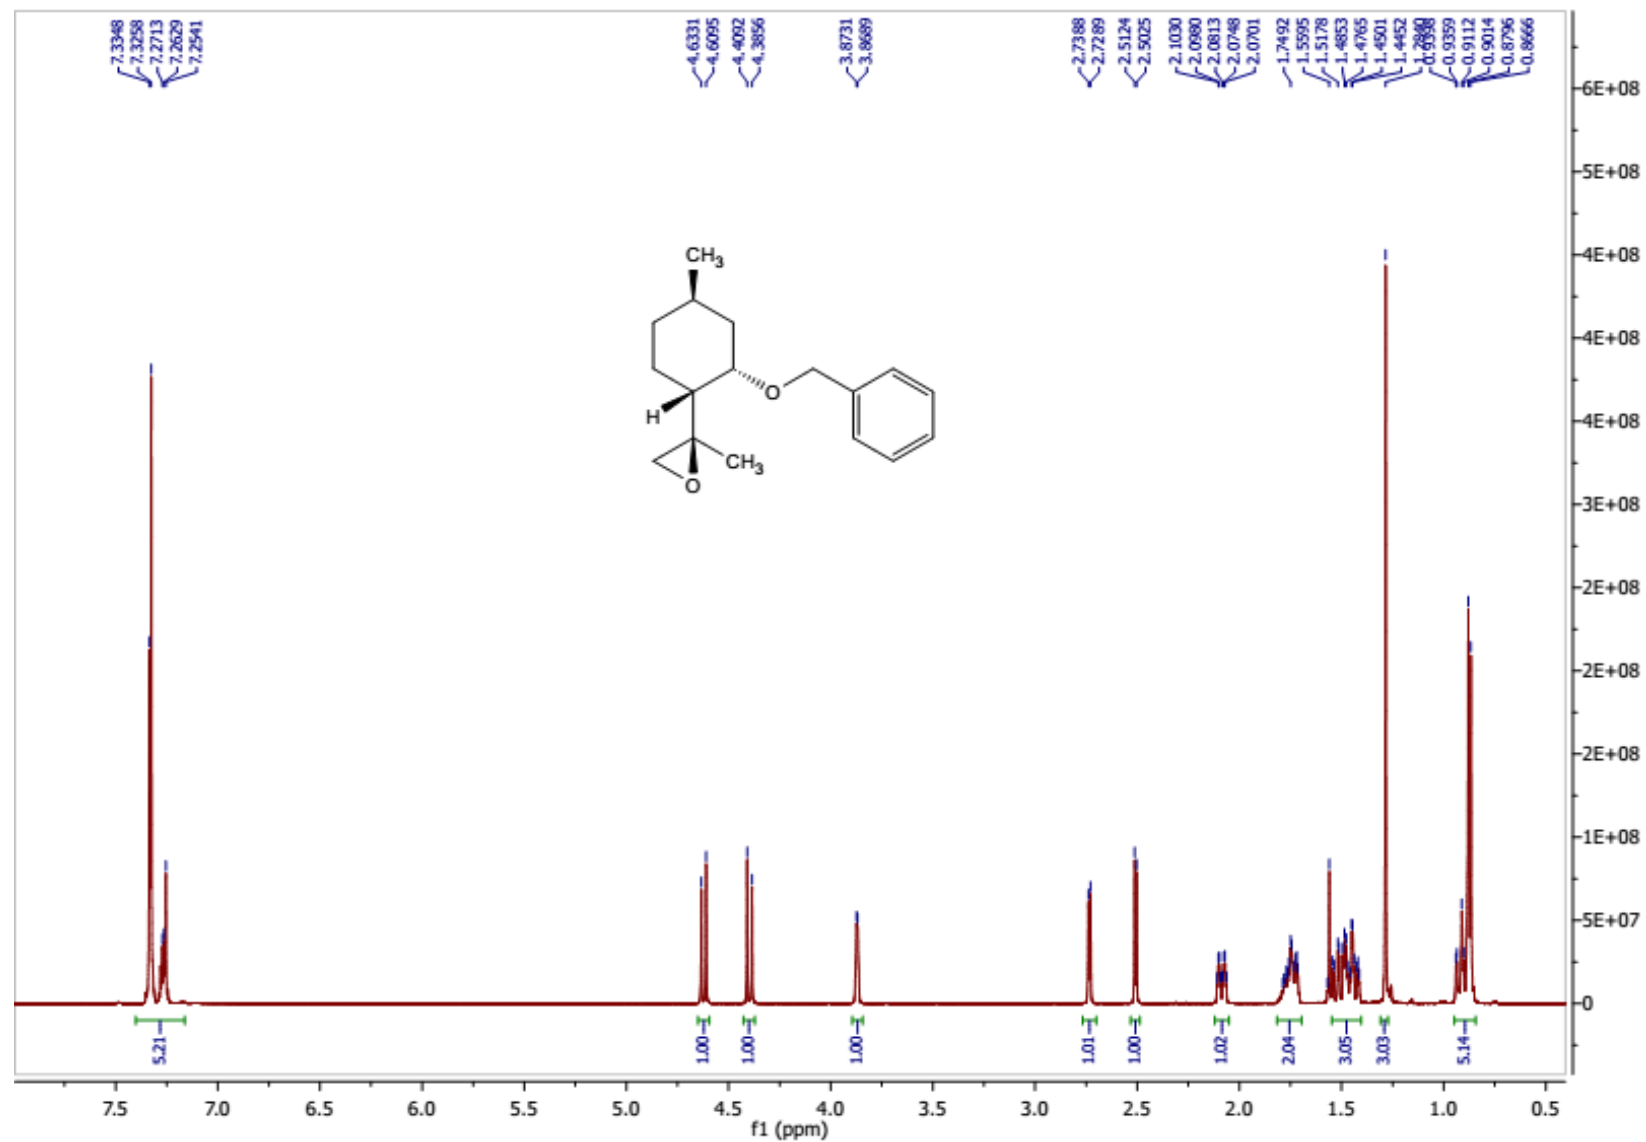

Figure S 4:  $^{13}\text{C}$ -NMR of compound **4a**

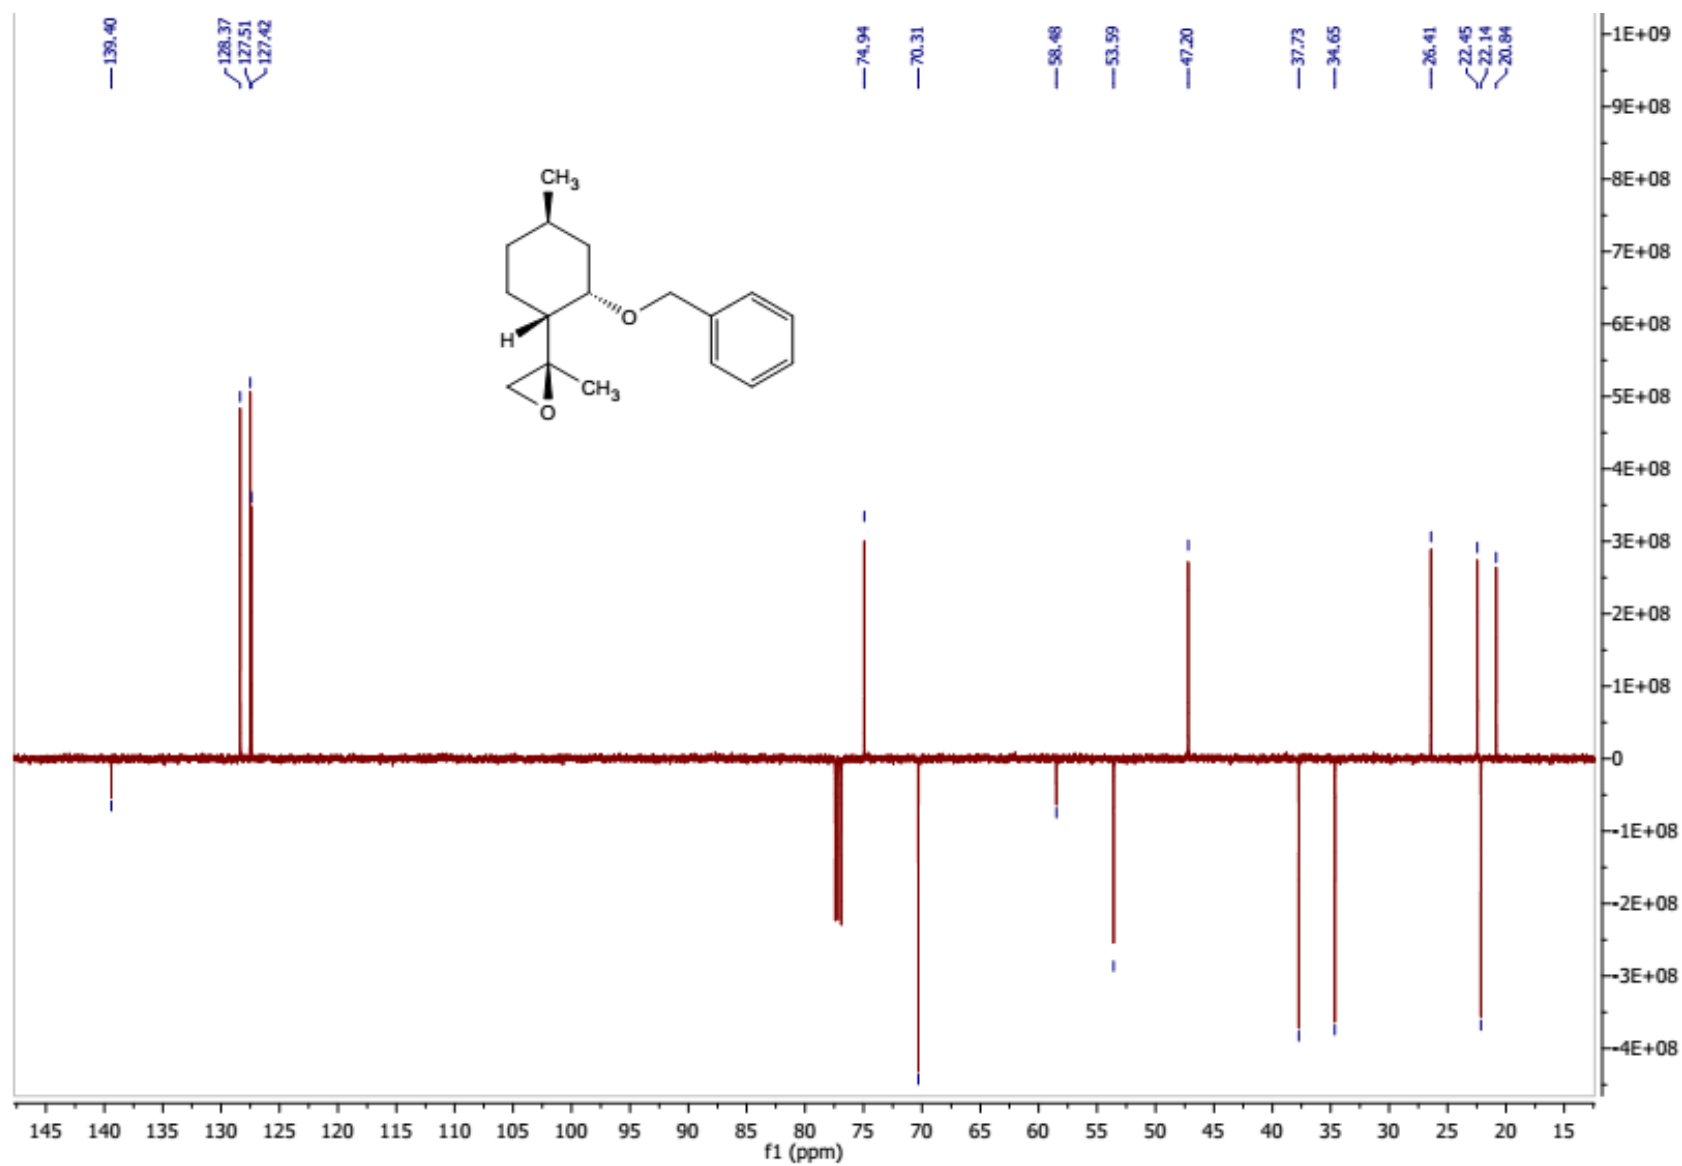

Figure S 5:  $^1\text{H}$ -NMR of compound **4b**

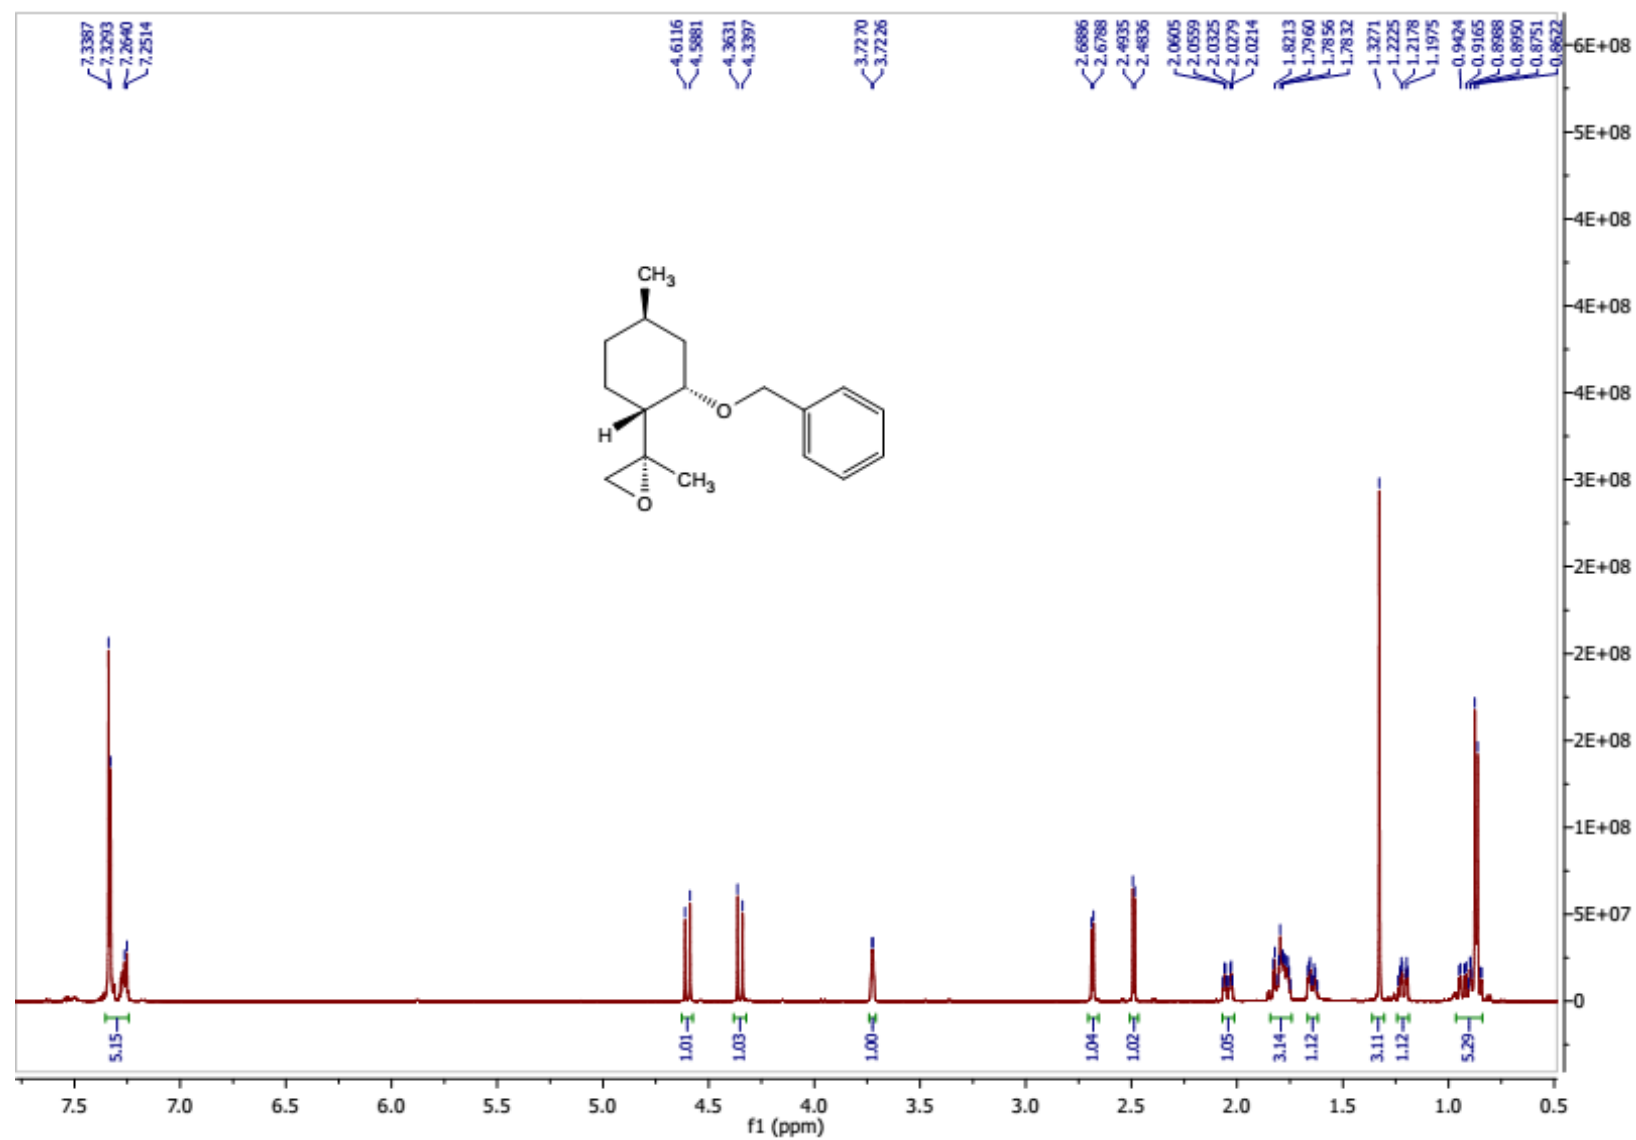

Figure S 6:  $^{13}\text{C}$ -NMR of compound **4b**

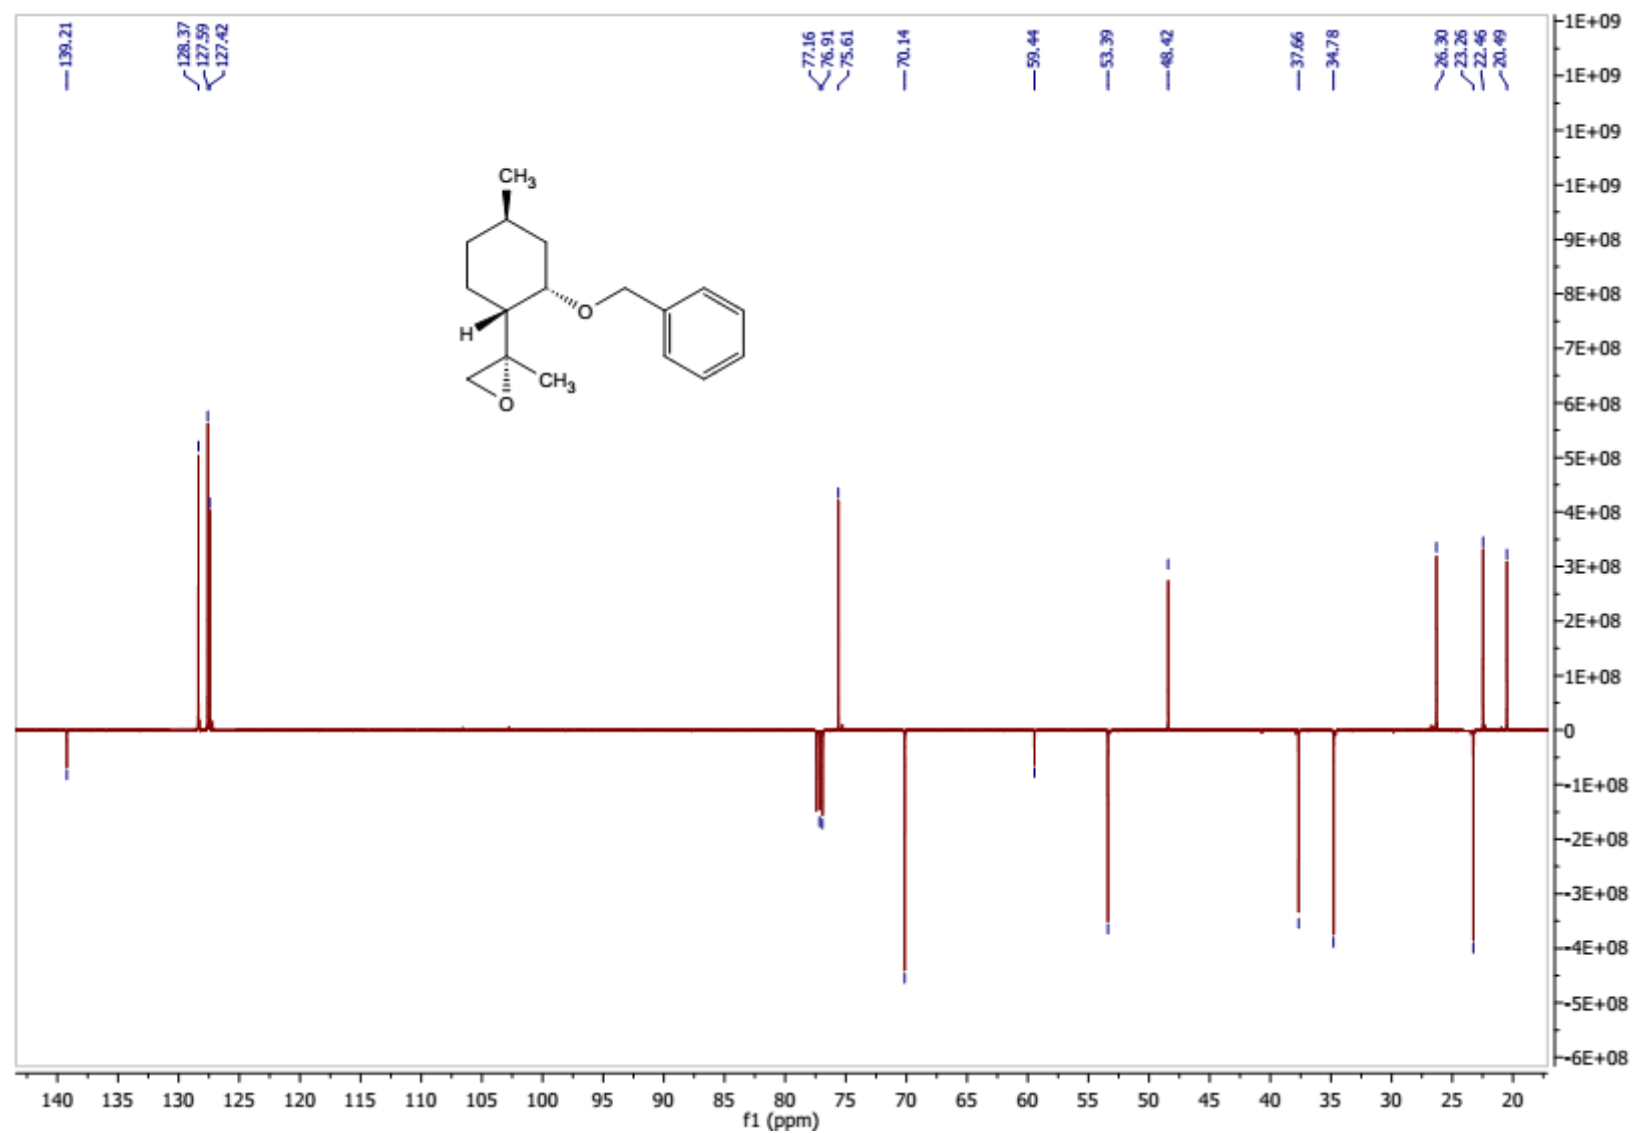

Figure S 7:  $^1\text{H}$ -NMR of compound **5a**

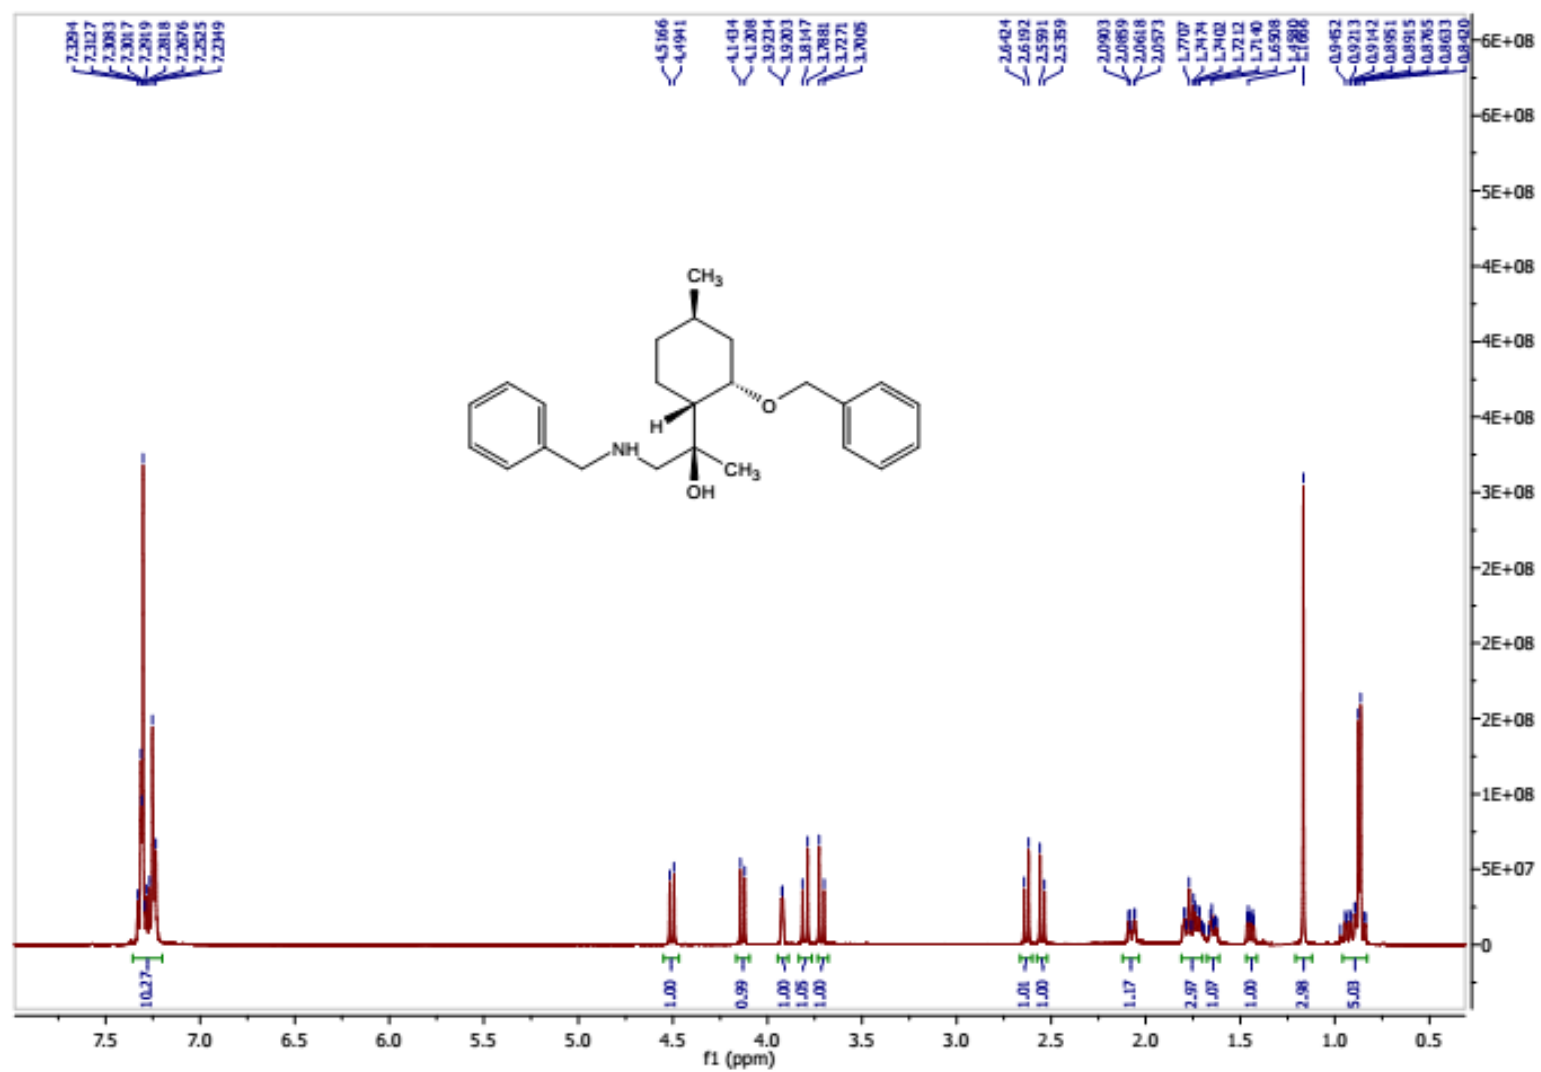

Figure S 8:  $^{13}\text{C}$ -NMR of compound 5a

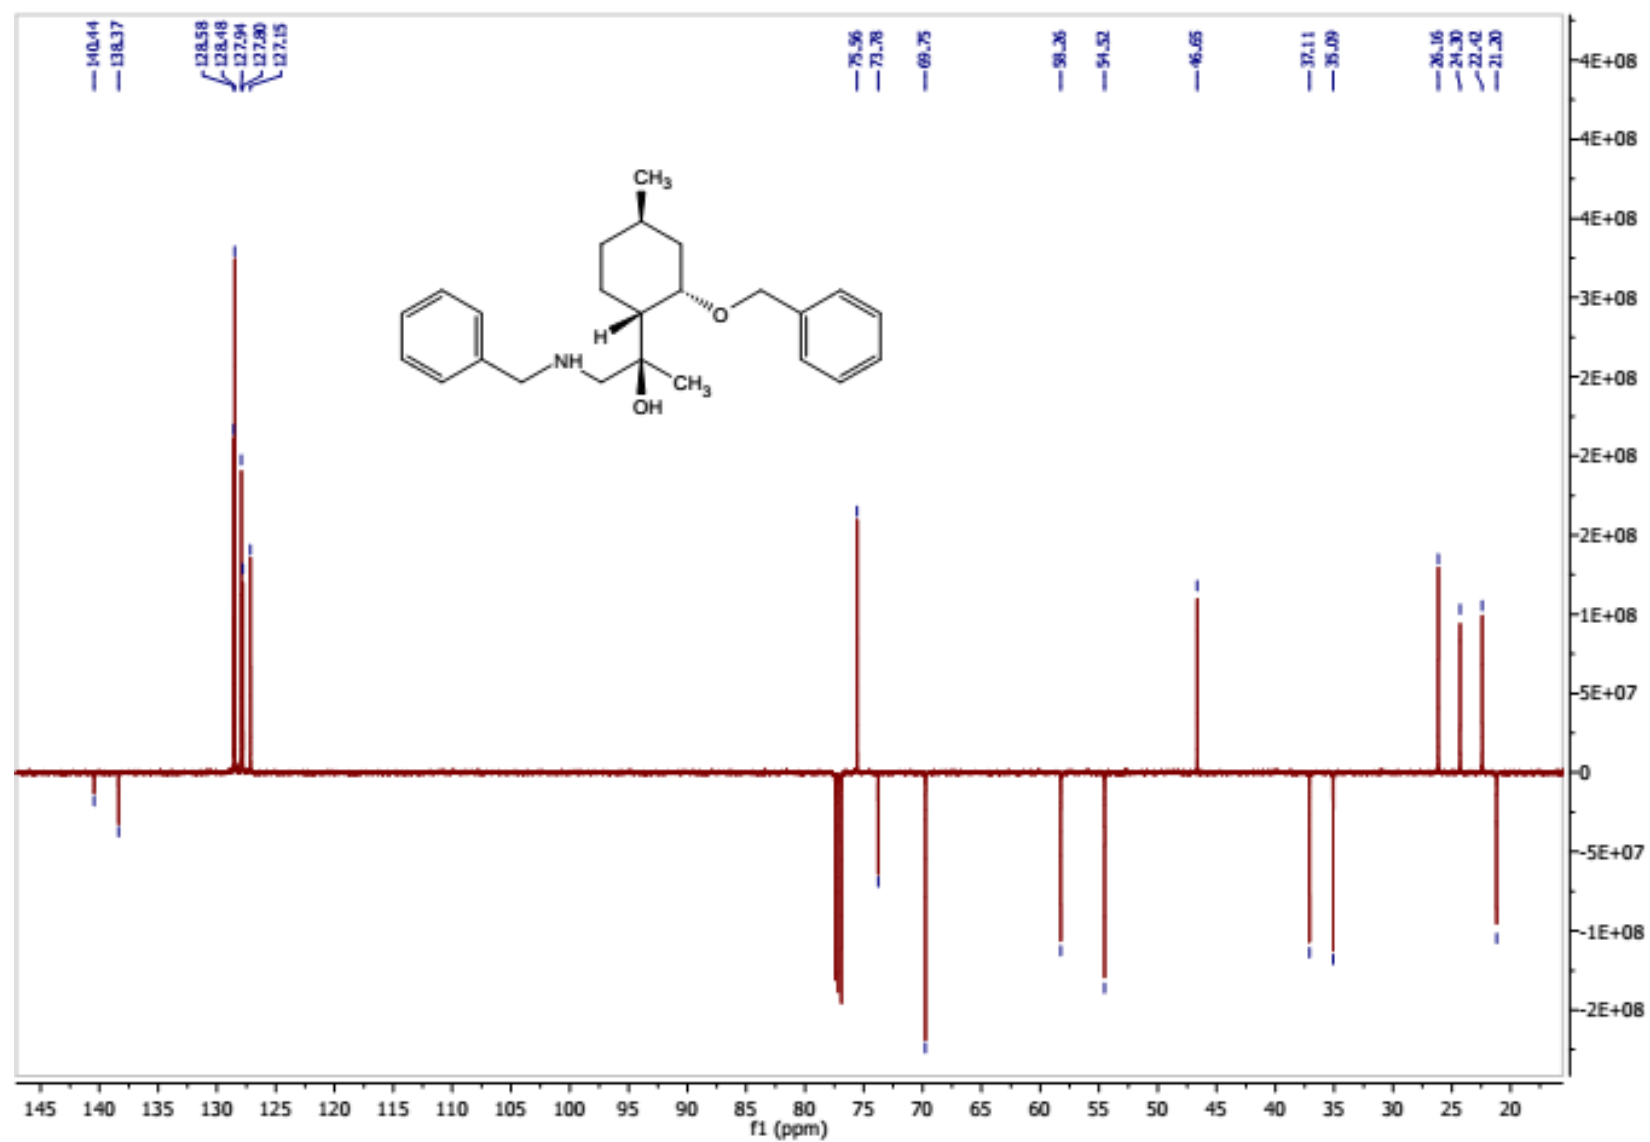

Figure S 9:  $^1\text{H}$ -NMR of compound **5b**

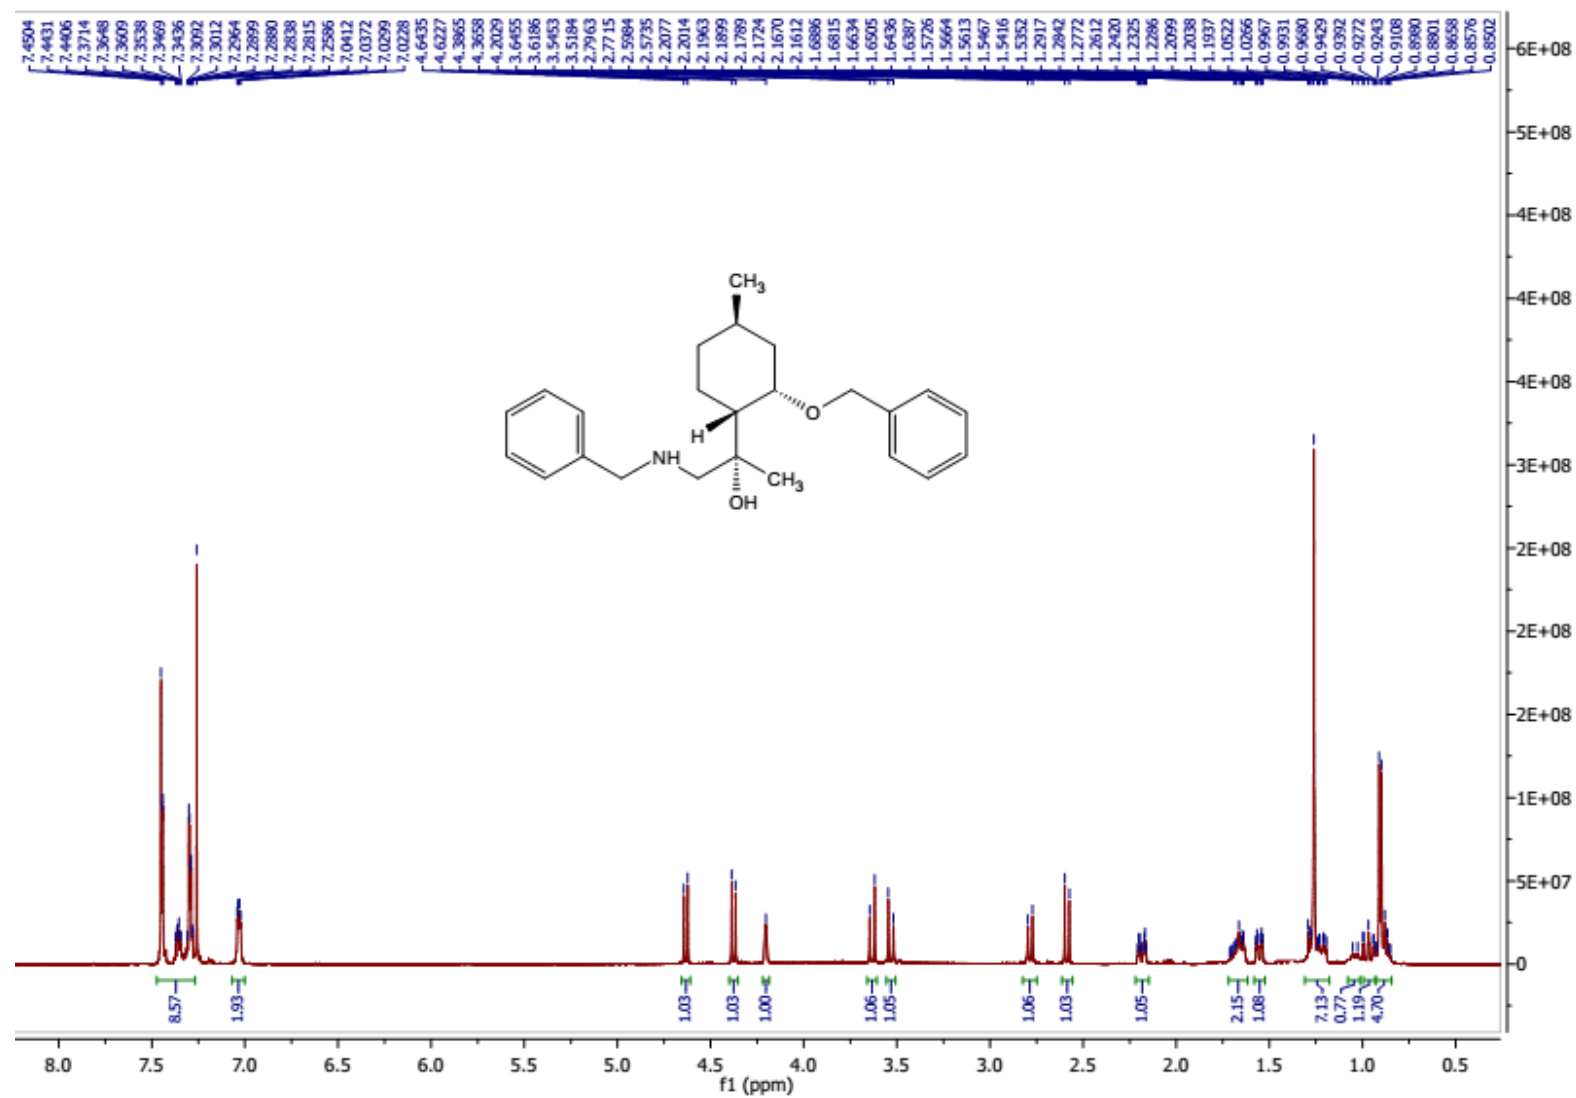

Figure S 10:  $^{13}\text{C}$ -NMR of compound **5b**

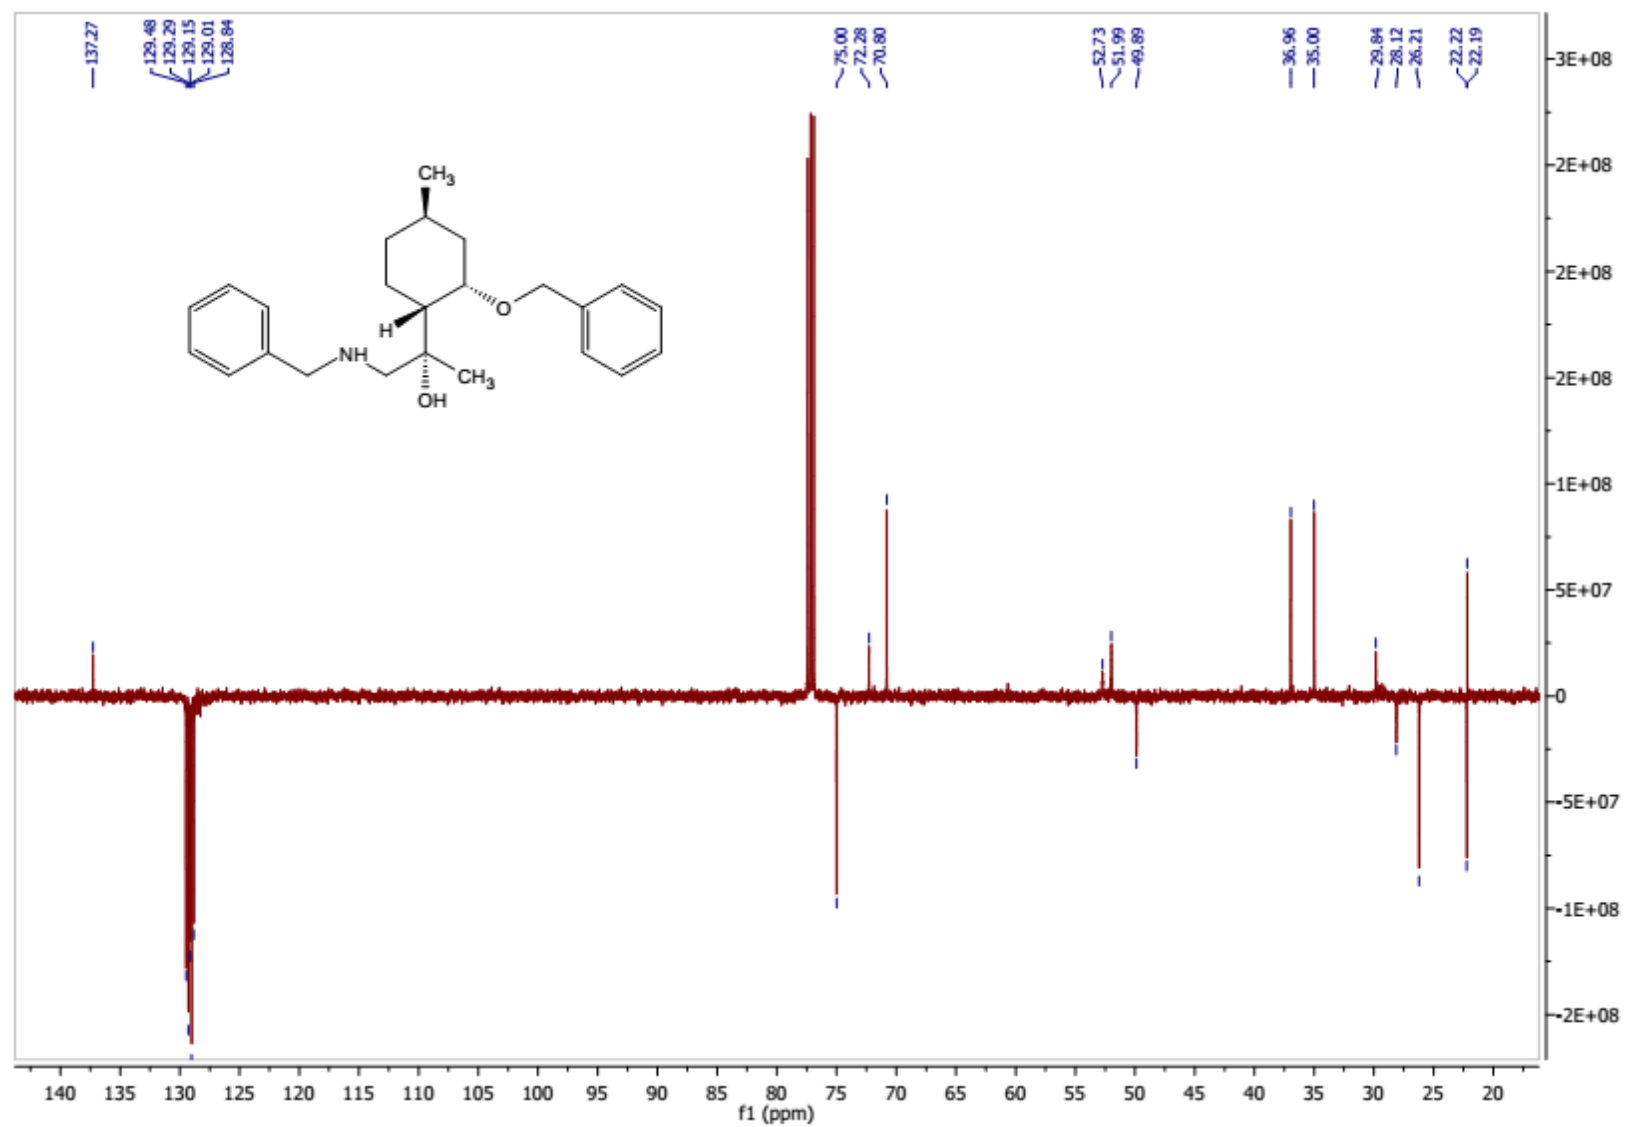



Figure S 11:  $^1\text{H}$ -NMR of compound 6a

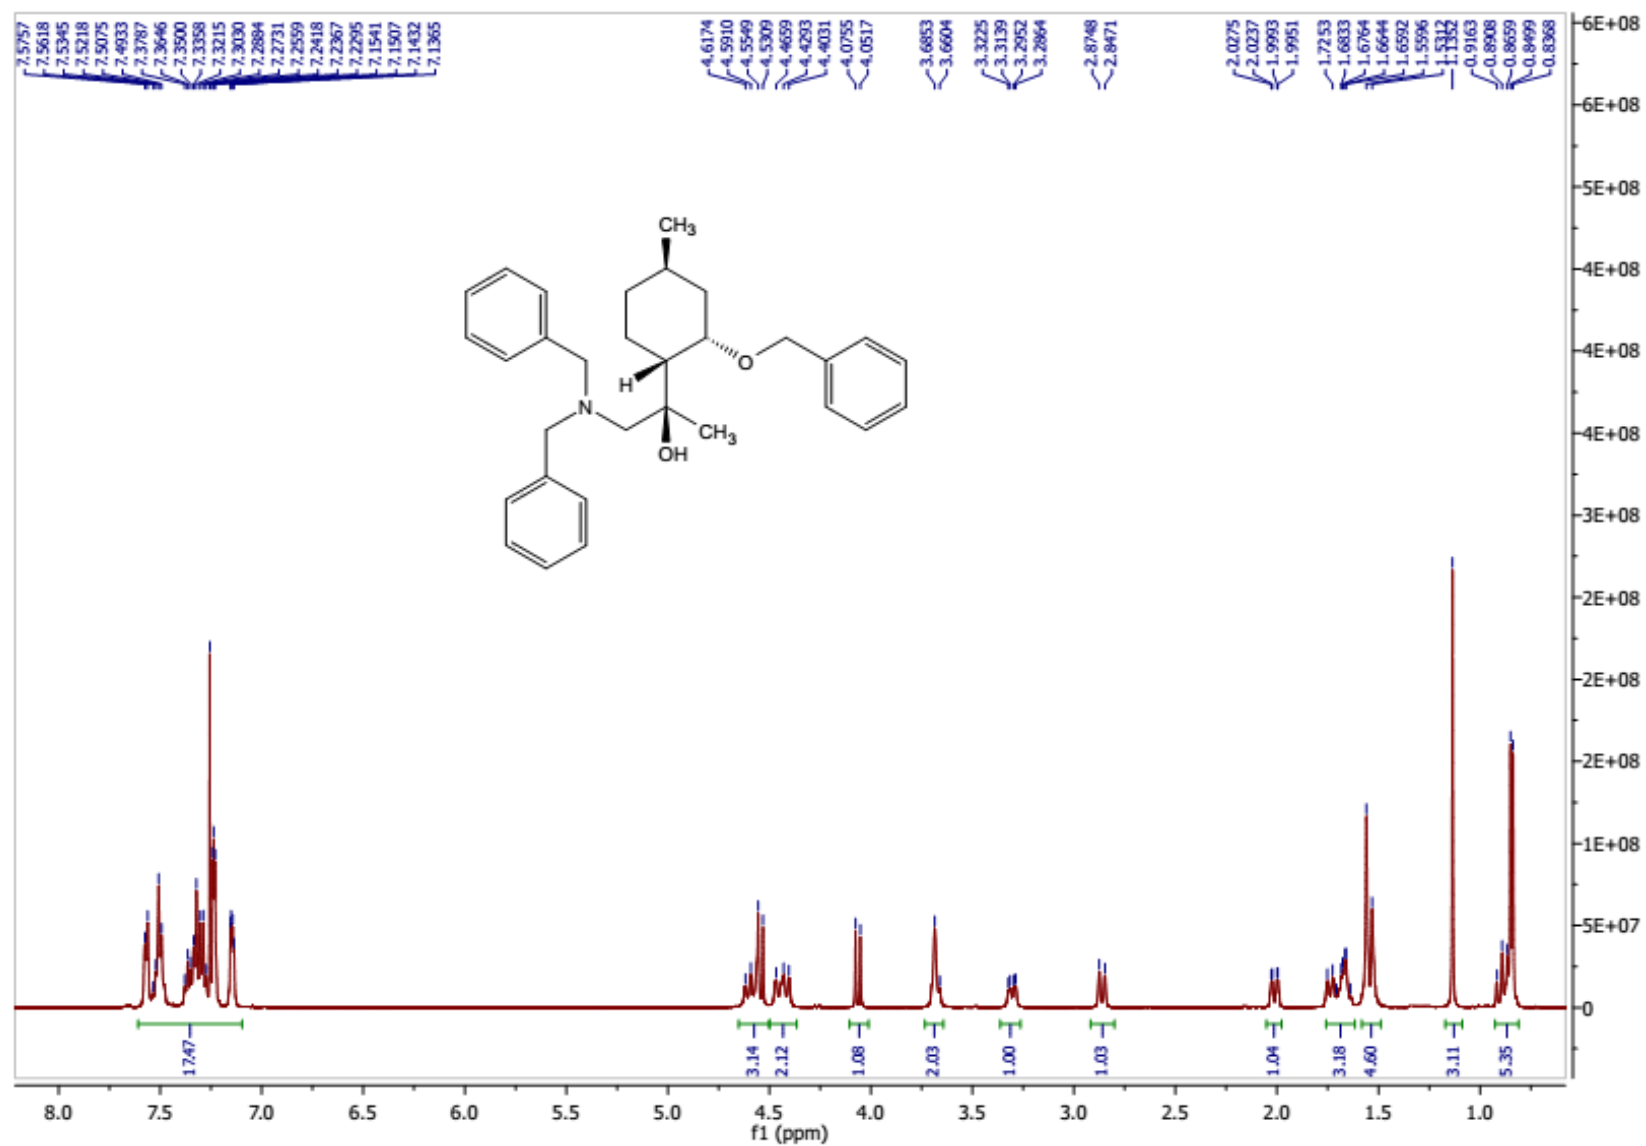

Figure S 12:  $^{13}\text{C}$ -NMR of compound **6a**

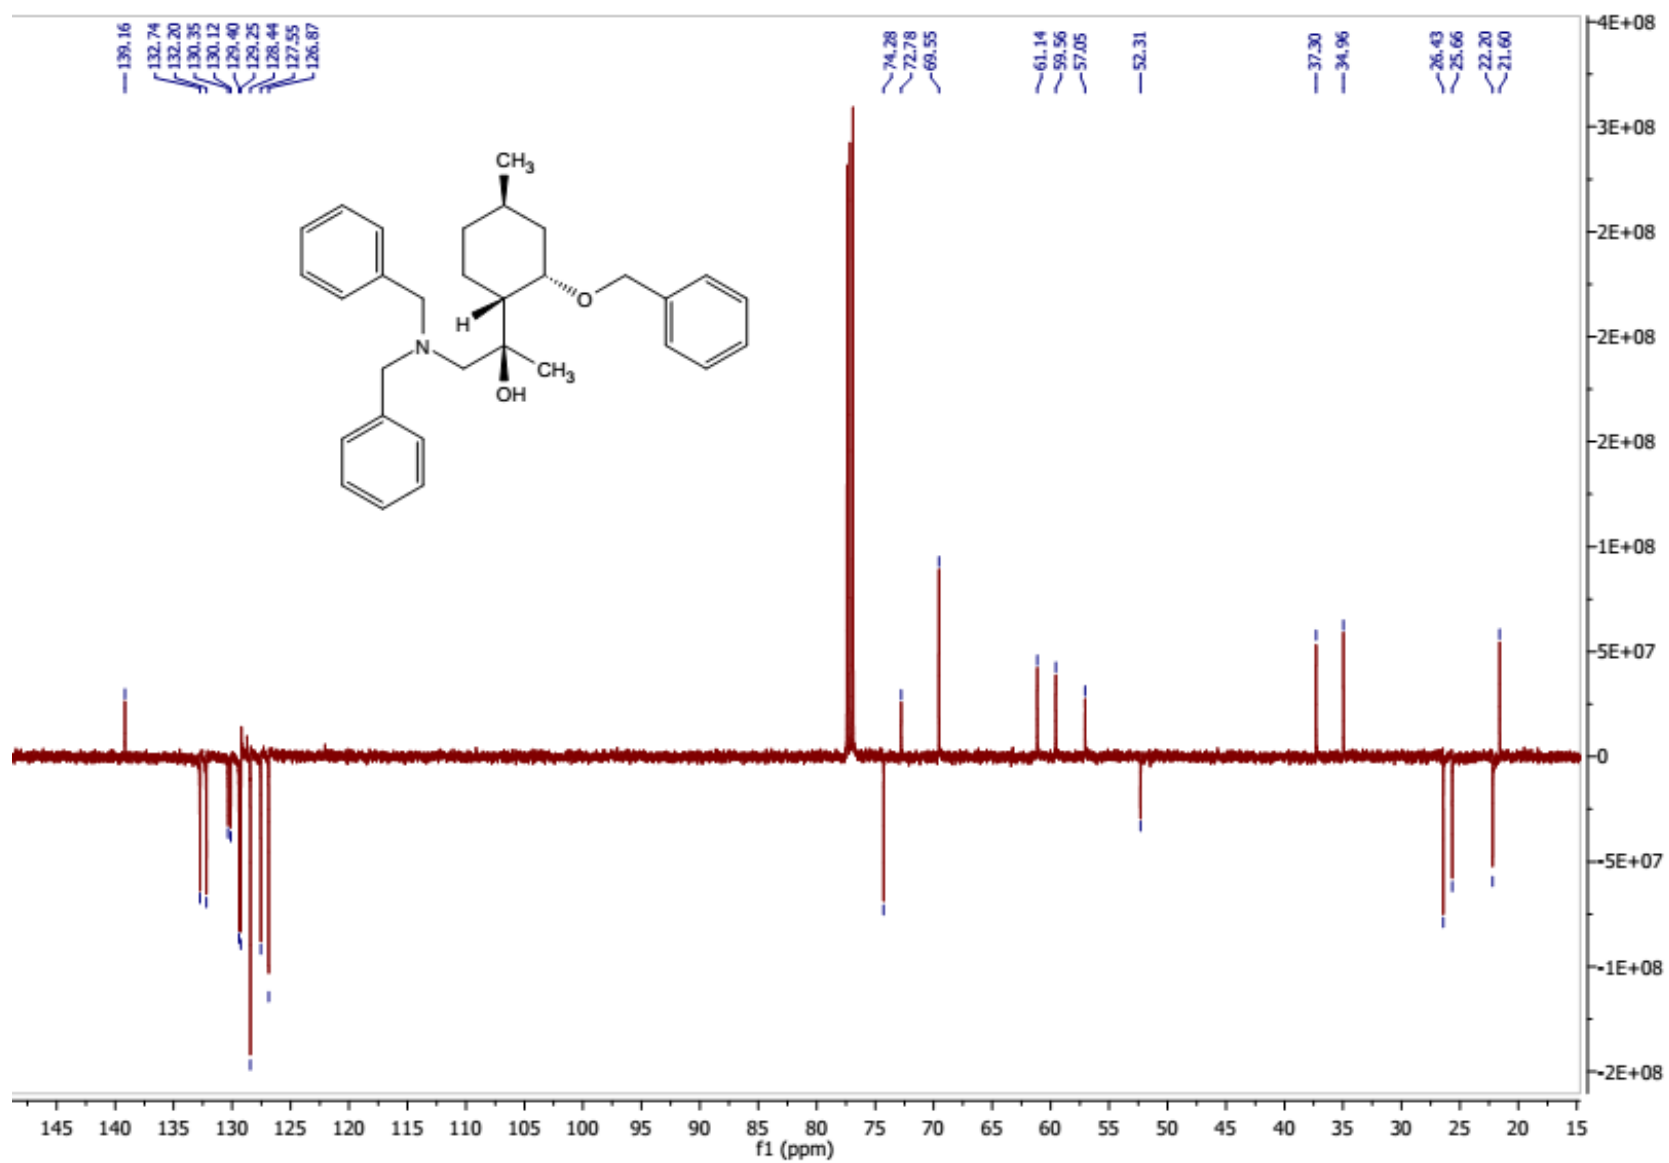

Figure S 13:  $^1\text{H}$ -NMR of compound **6b**

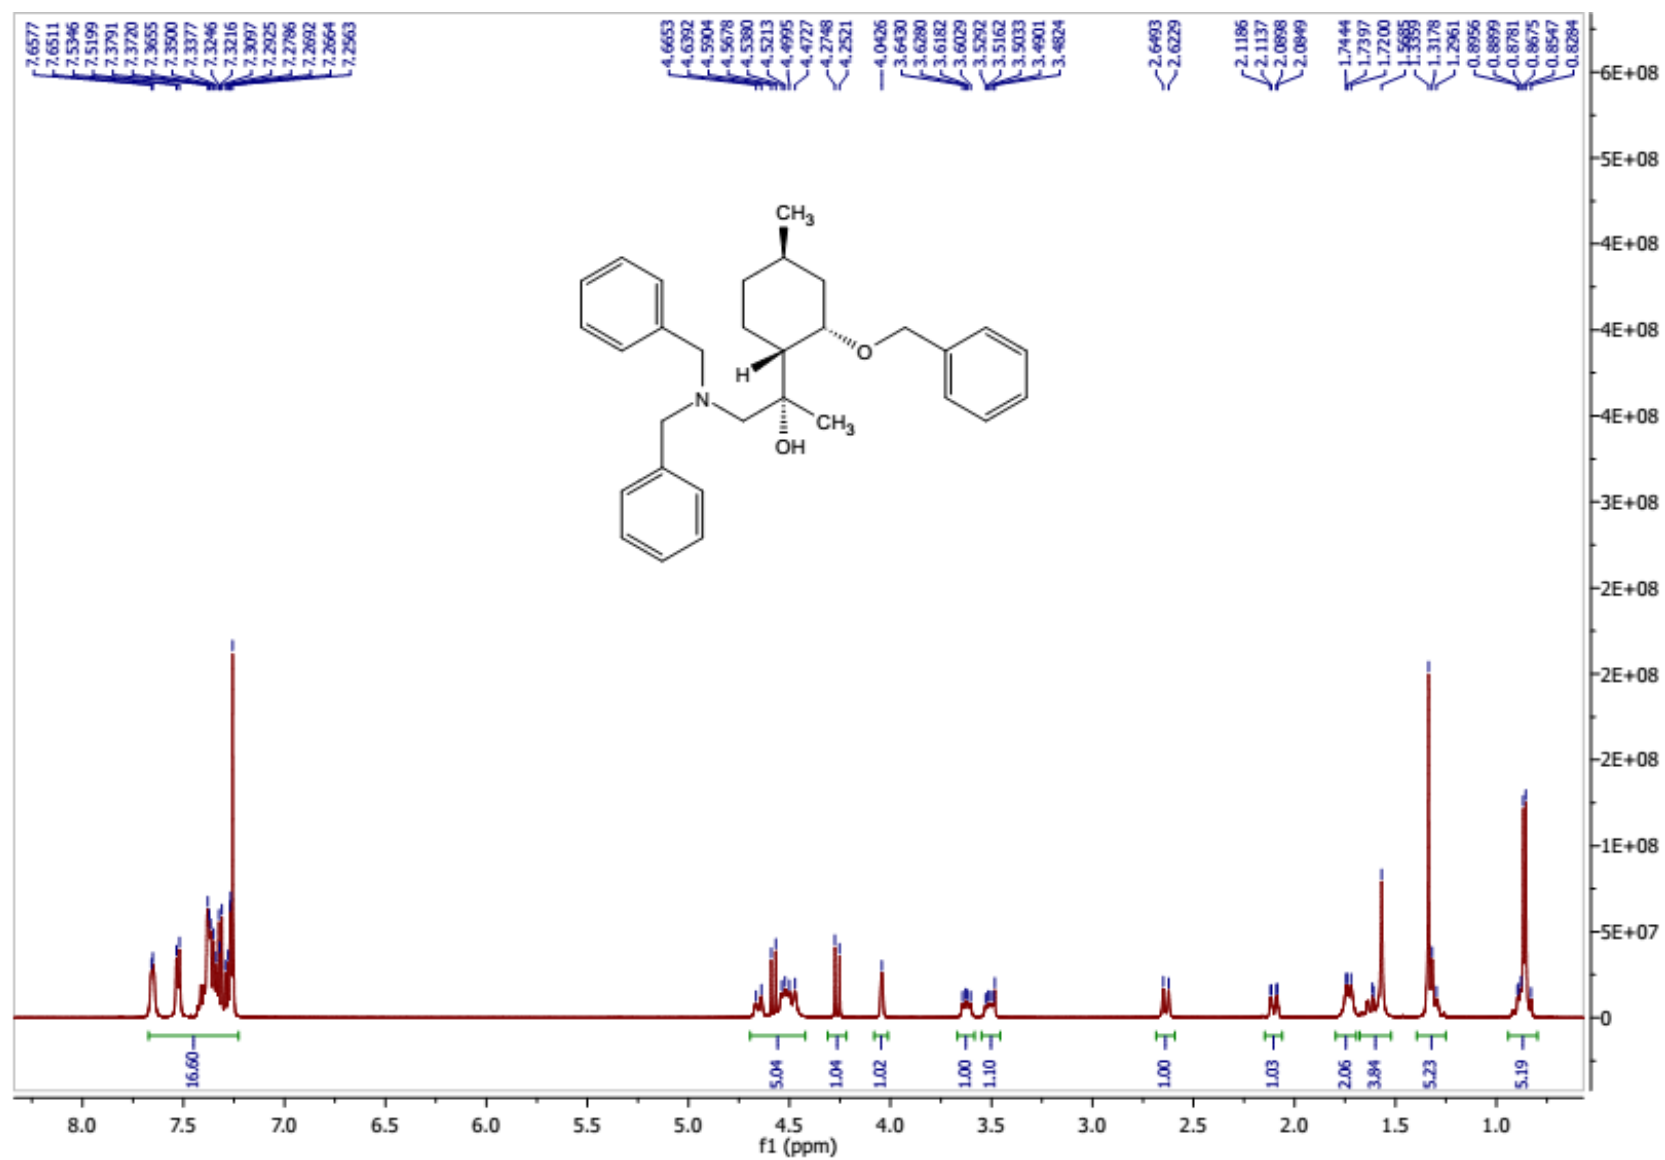

<sup>13</sup>C-NMR of compound **6a**

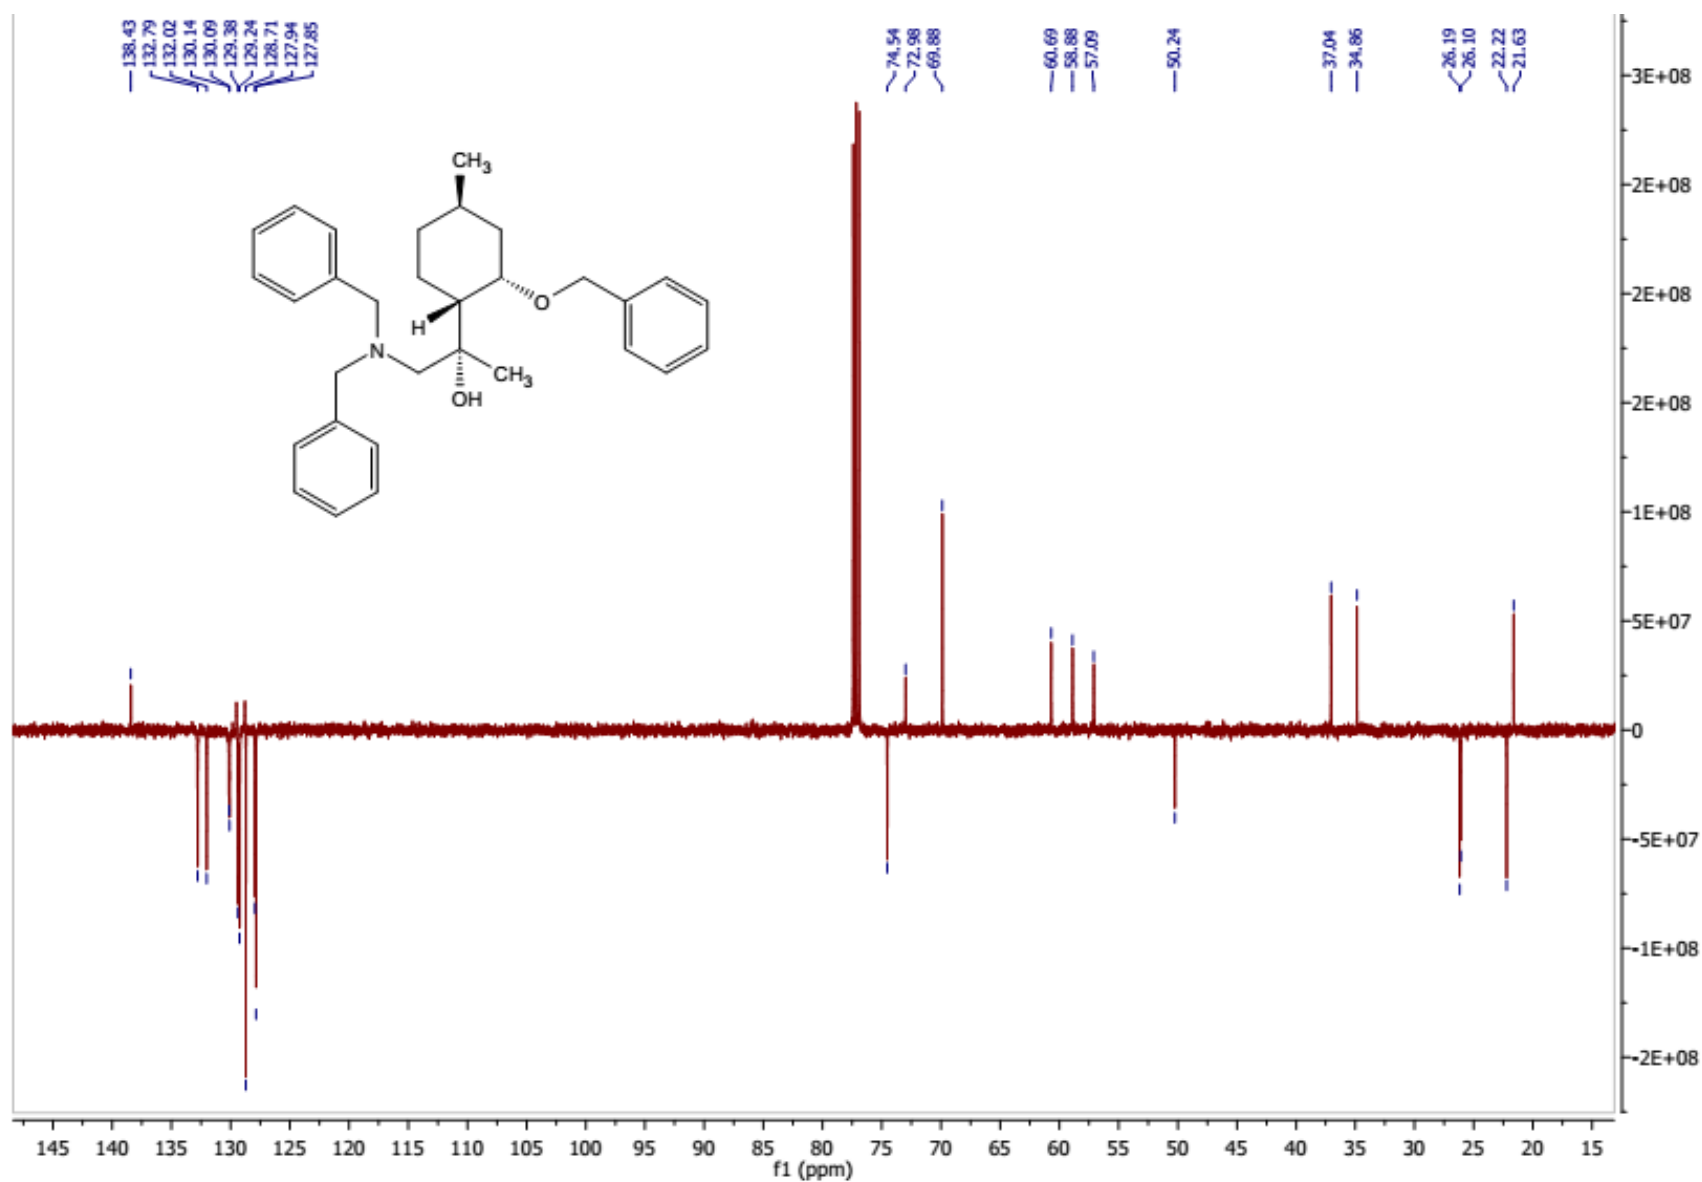

Figure S 14:  $^1\text{H}$ -NMR of compound 7a

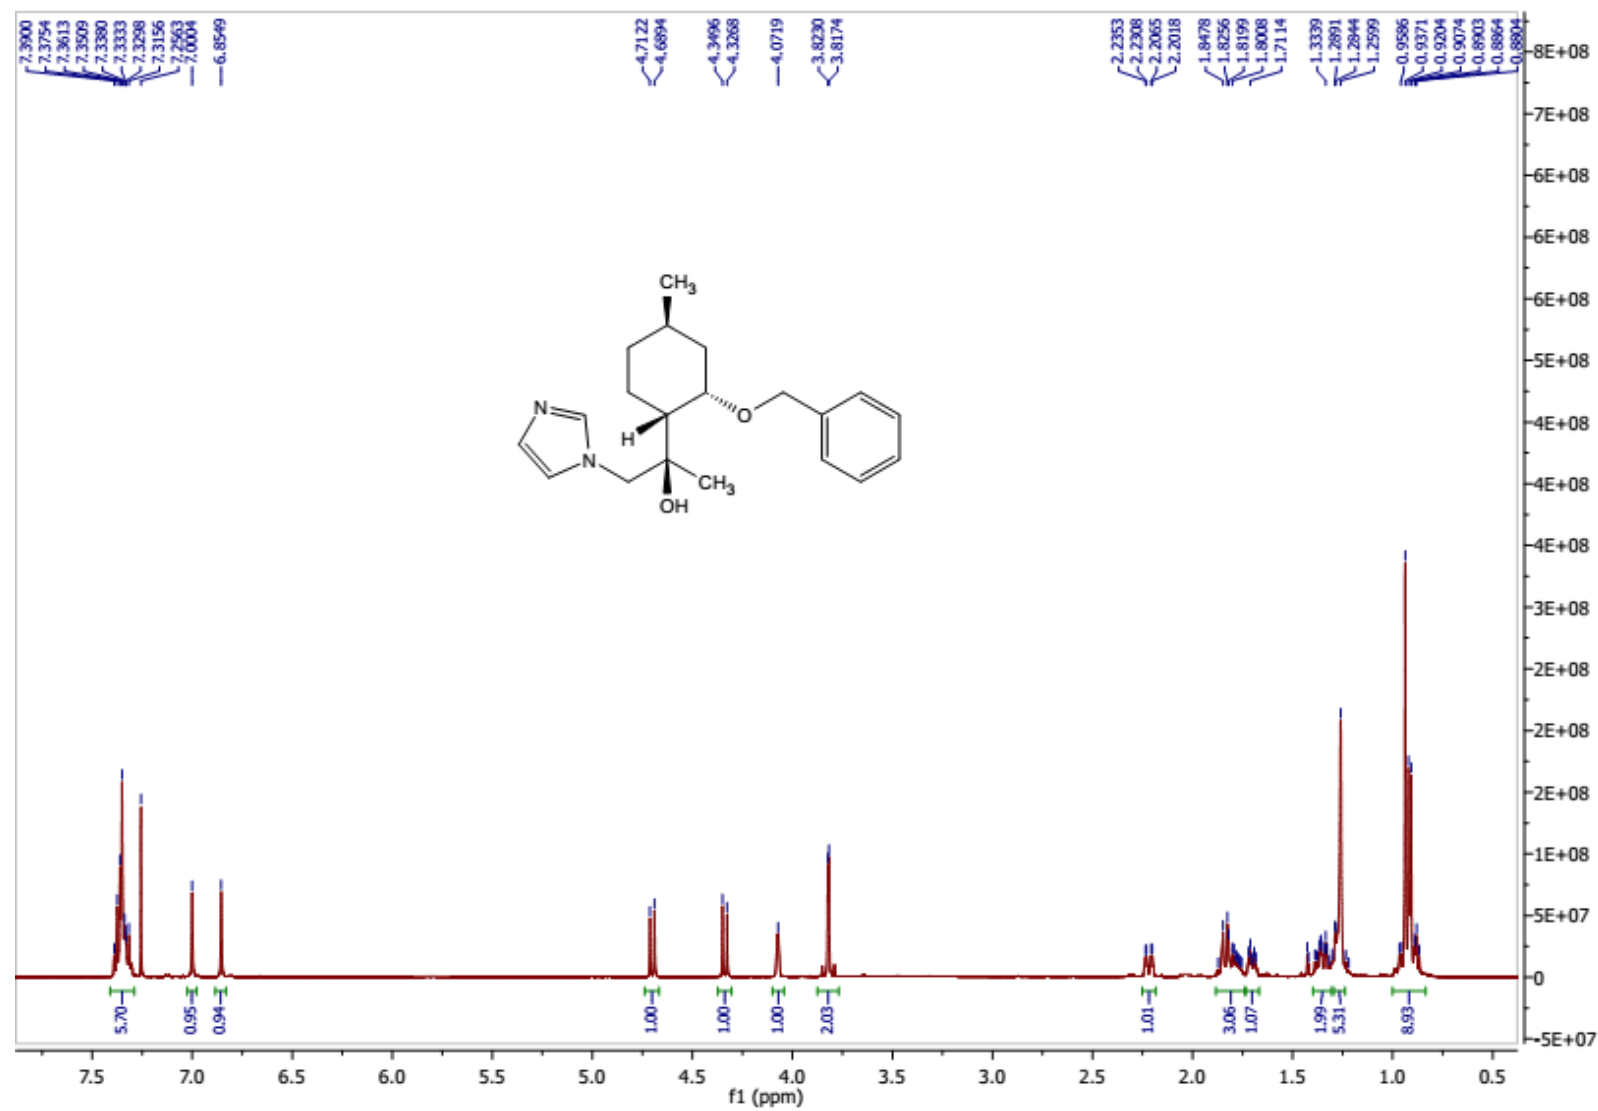

Figure S 15:  $^{13}\text{C}$ -NMR of compound **7a**

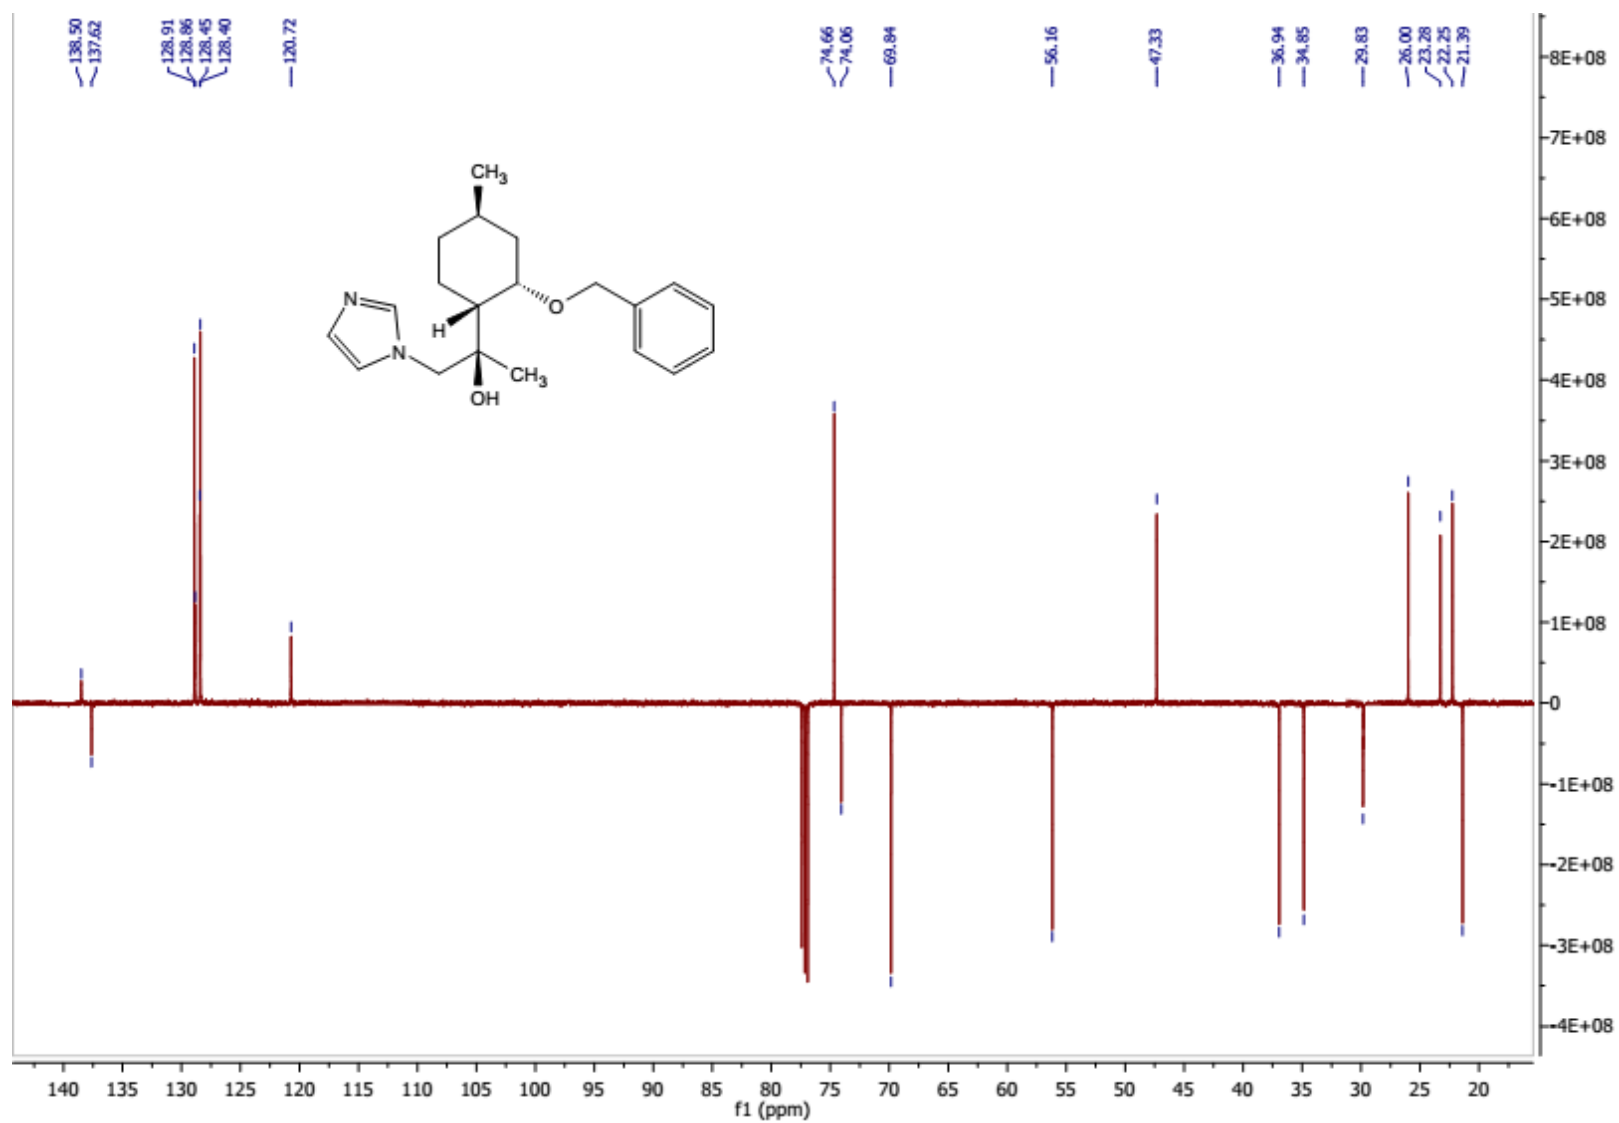

Figure S 16:  $^1\text{H}$ -NMR of compound **7b**

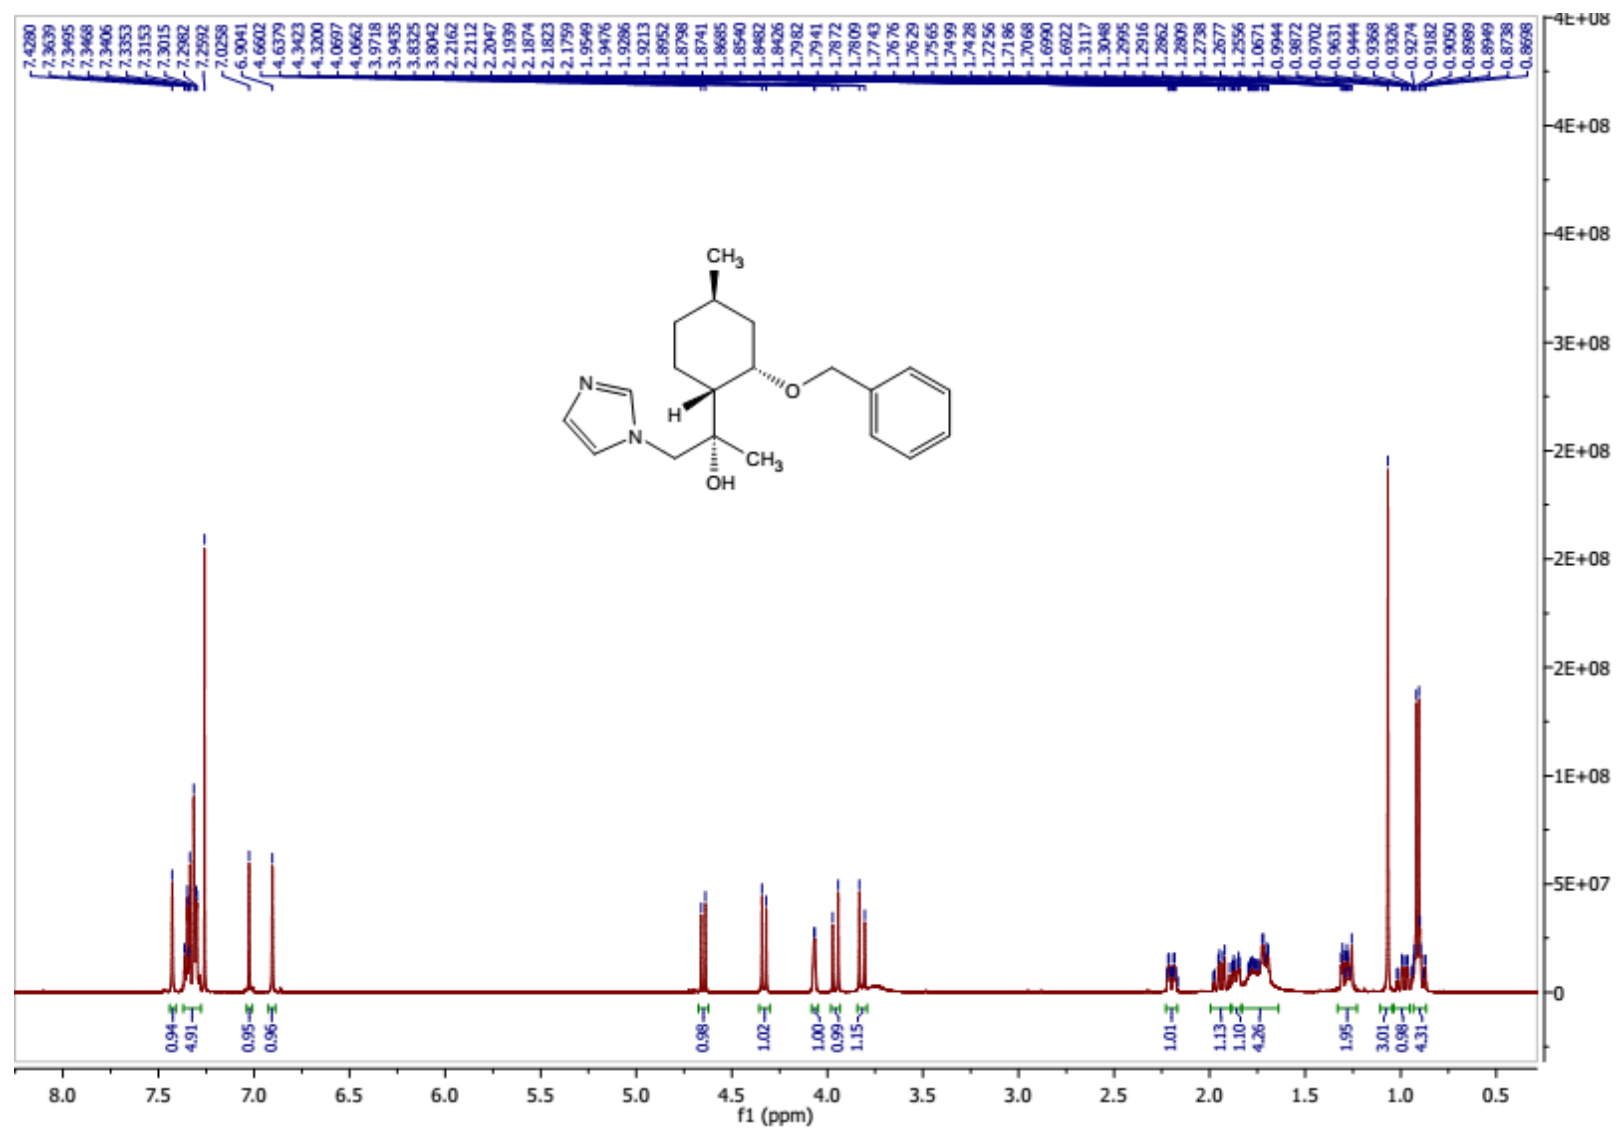

Figure S 17:  $^{13}\text{C}$ -NMR of compound **7b**

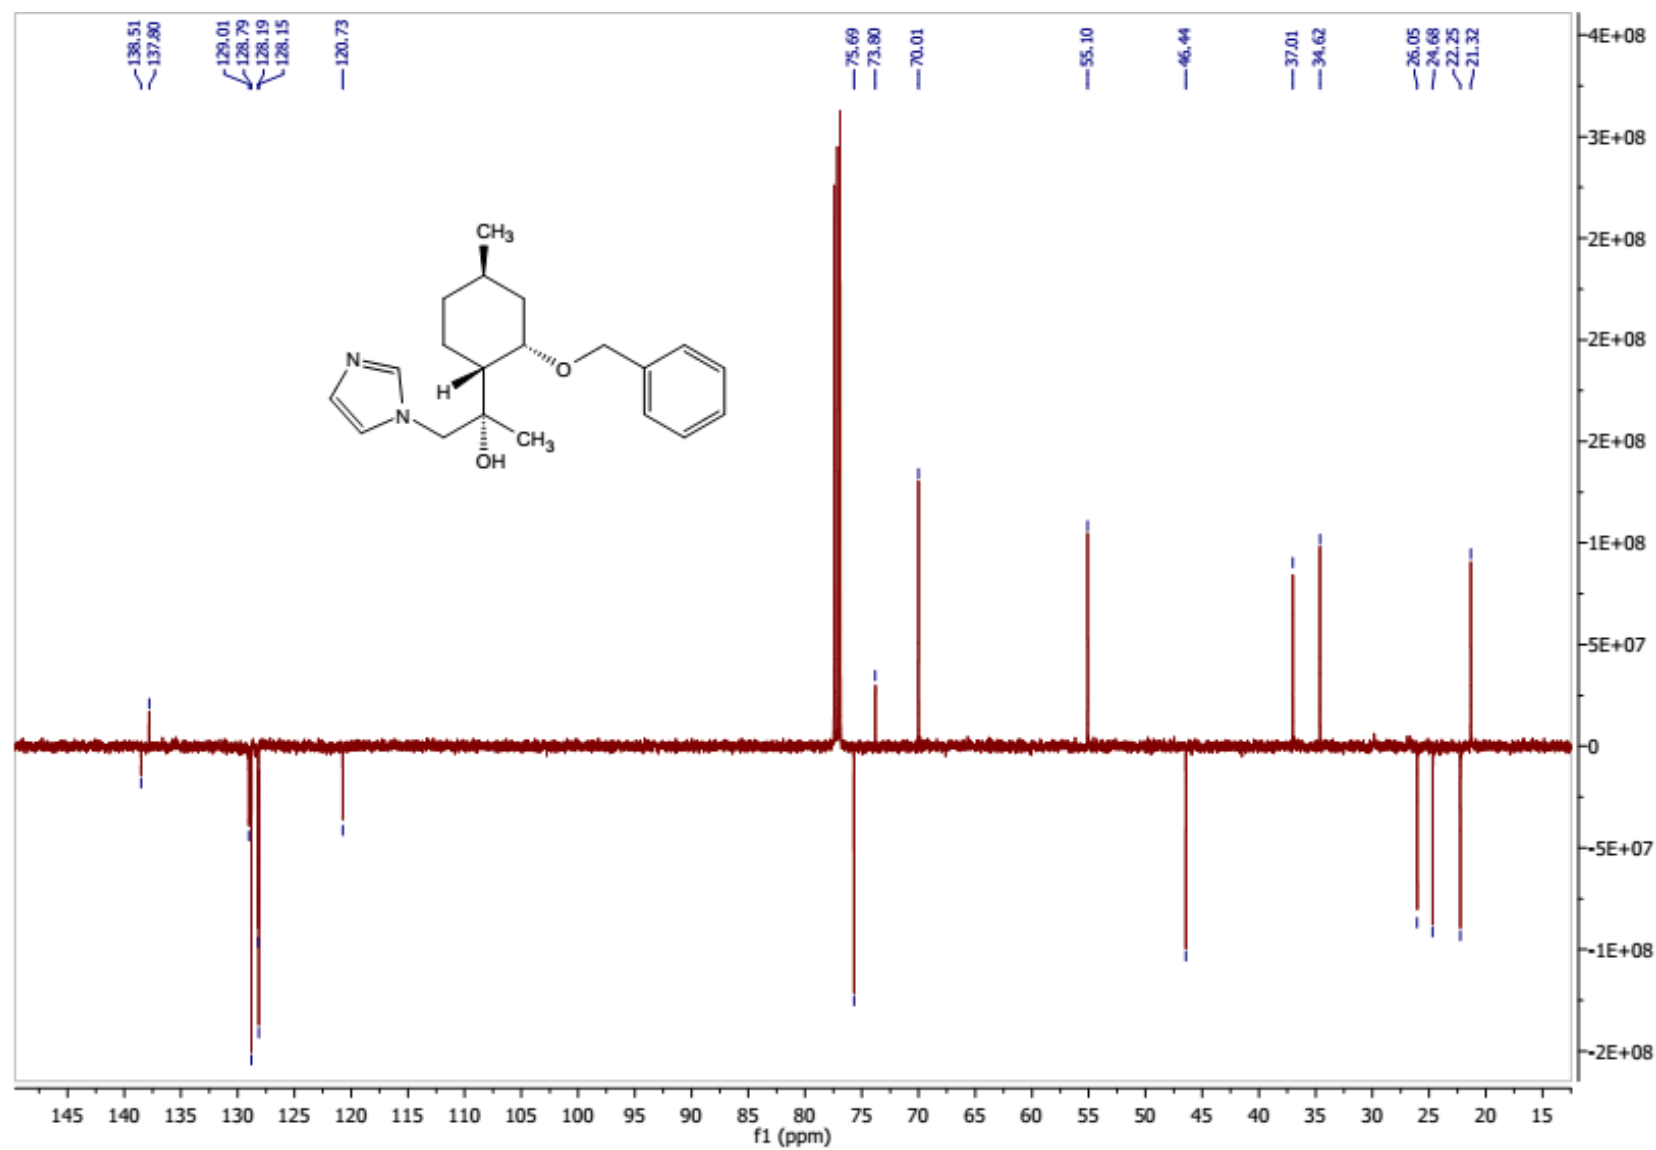



Figure S 18:  $^1\text{H}$ -NMR of compound 8a

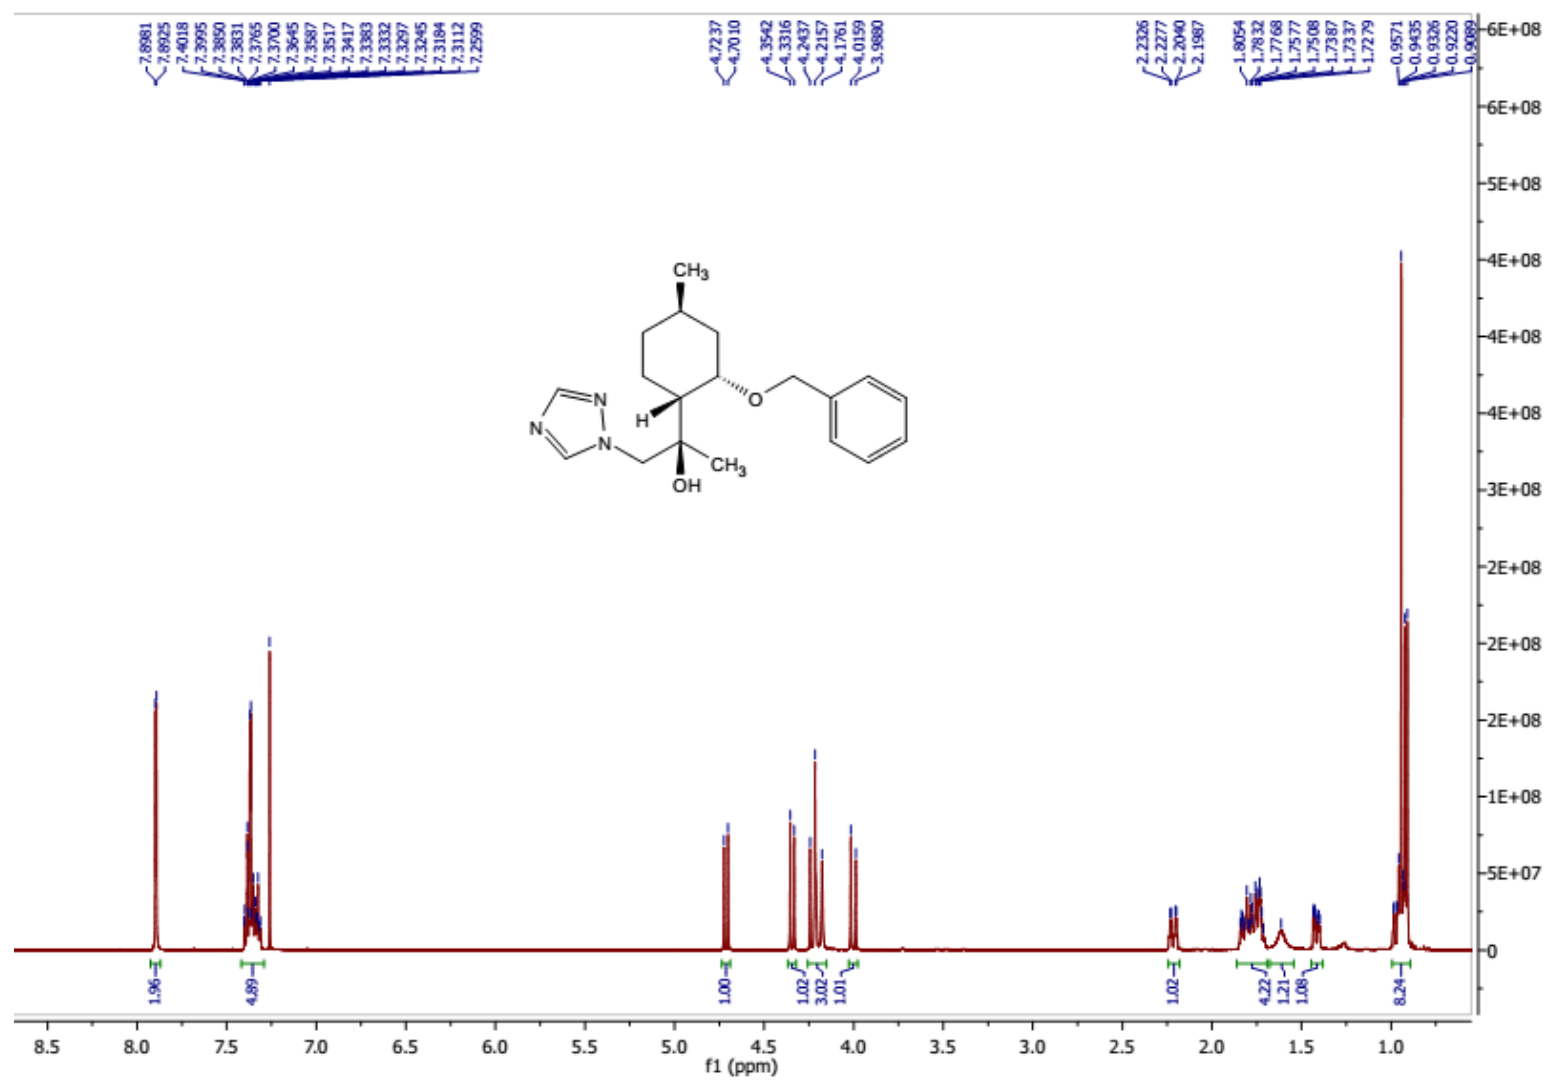

Figure S 19:  $^{13}\text{C}$ -NMR of compound **8a**

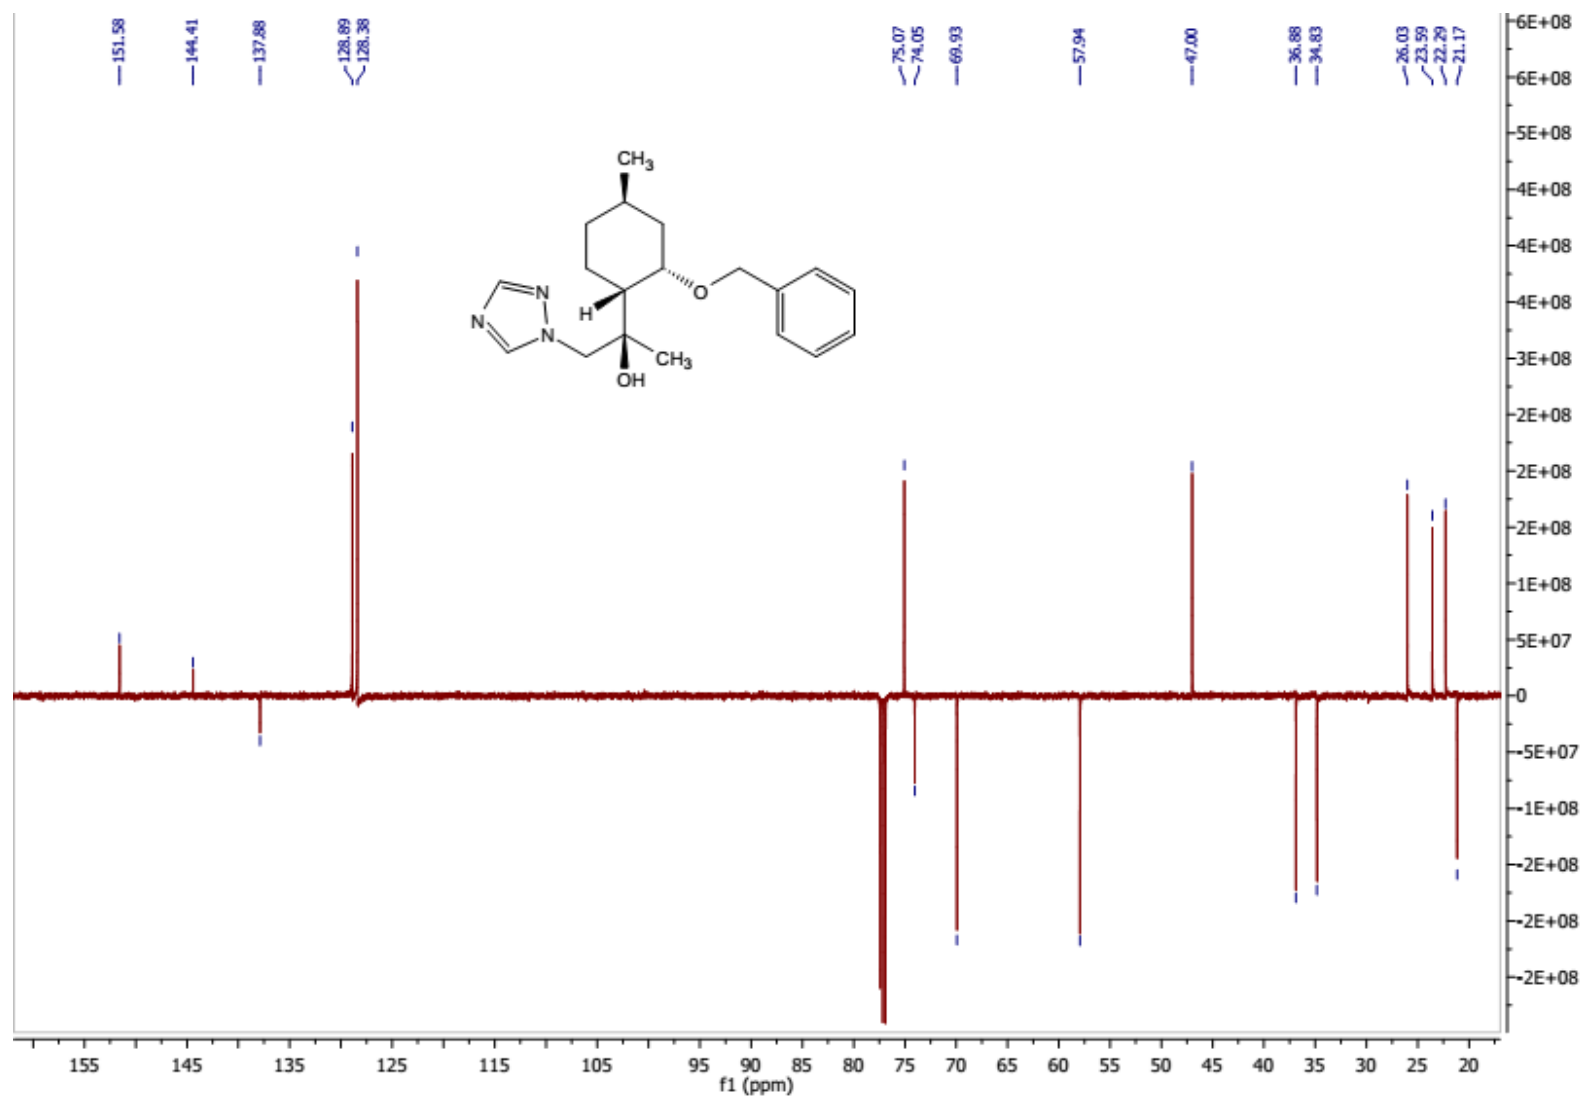

Figure S 20:  $^1\text{H}$ -NMR of compound **8b**

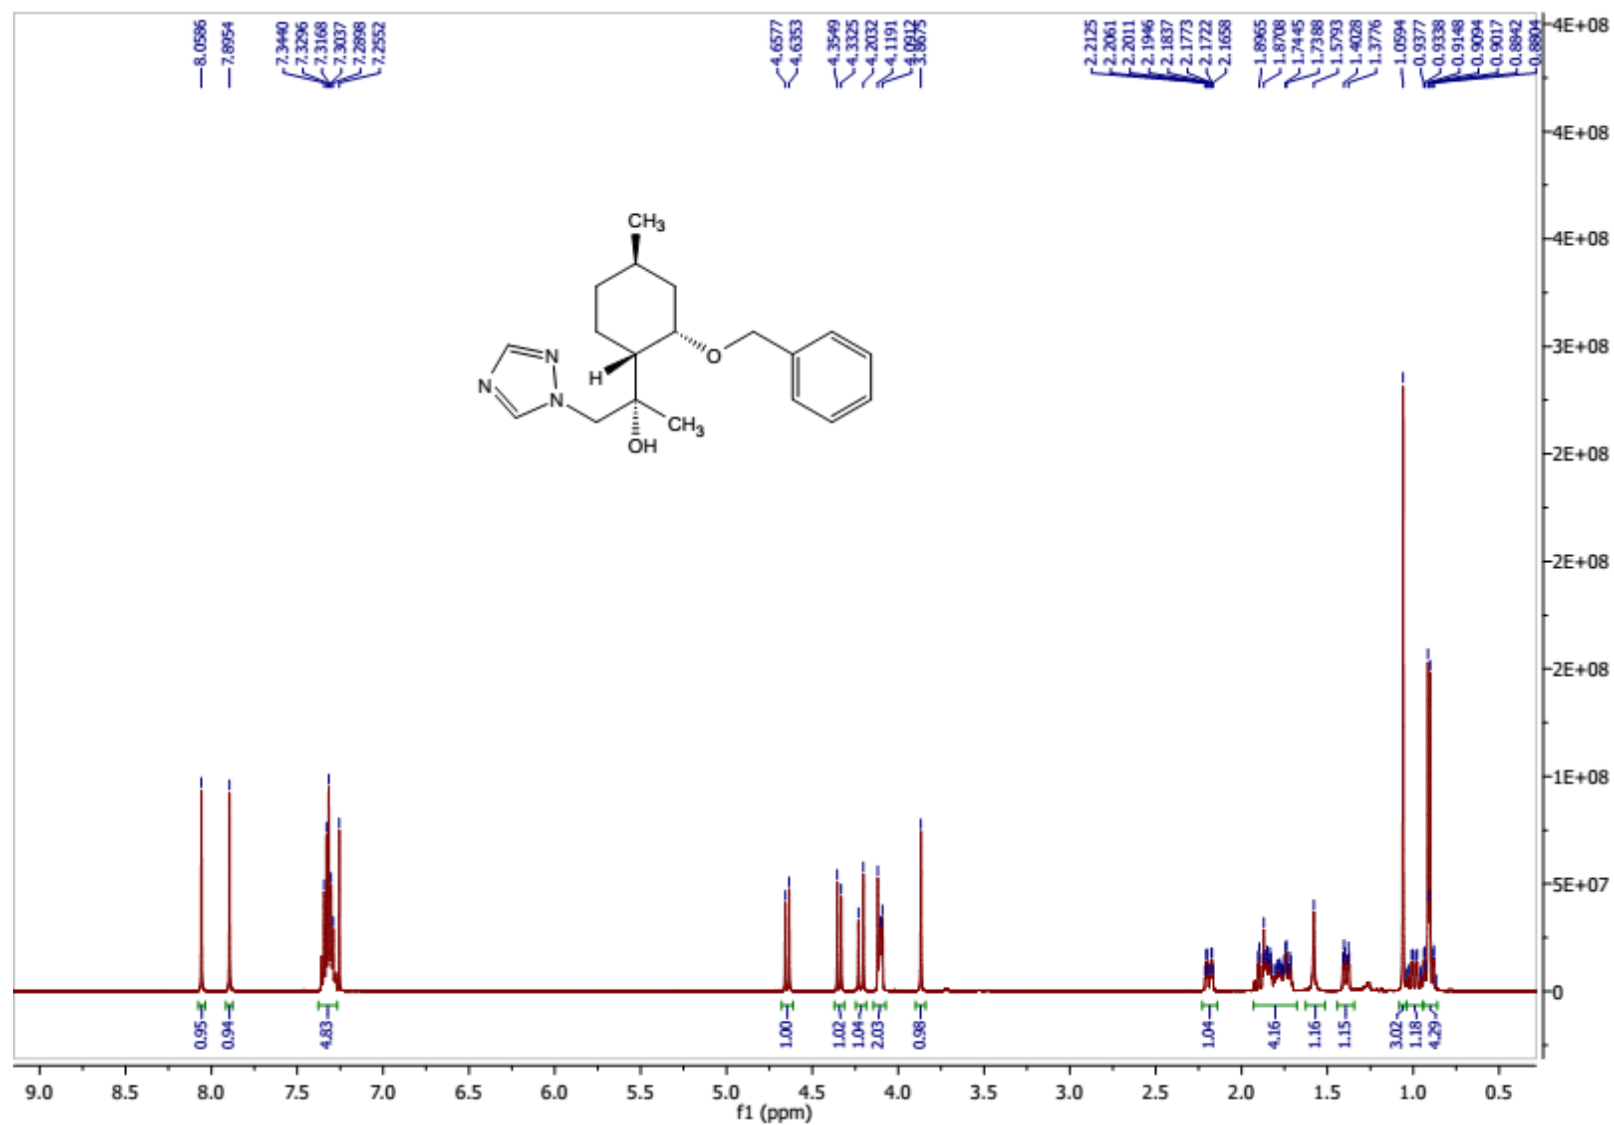

Figure S 21:  $^{13}\text{C}$ -NMR of compound **8b**

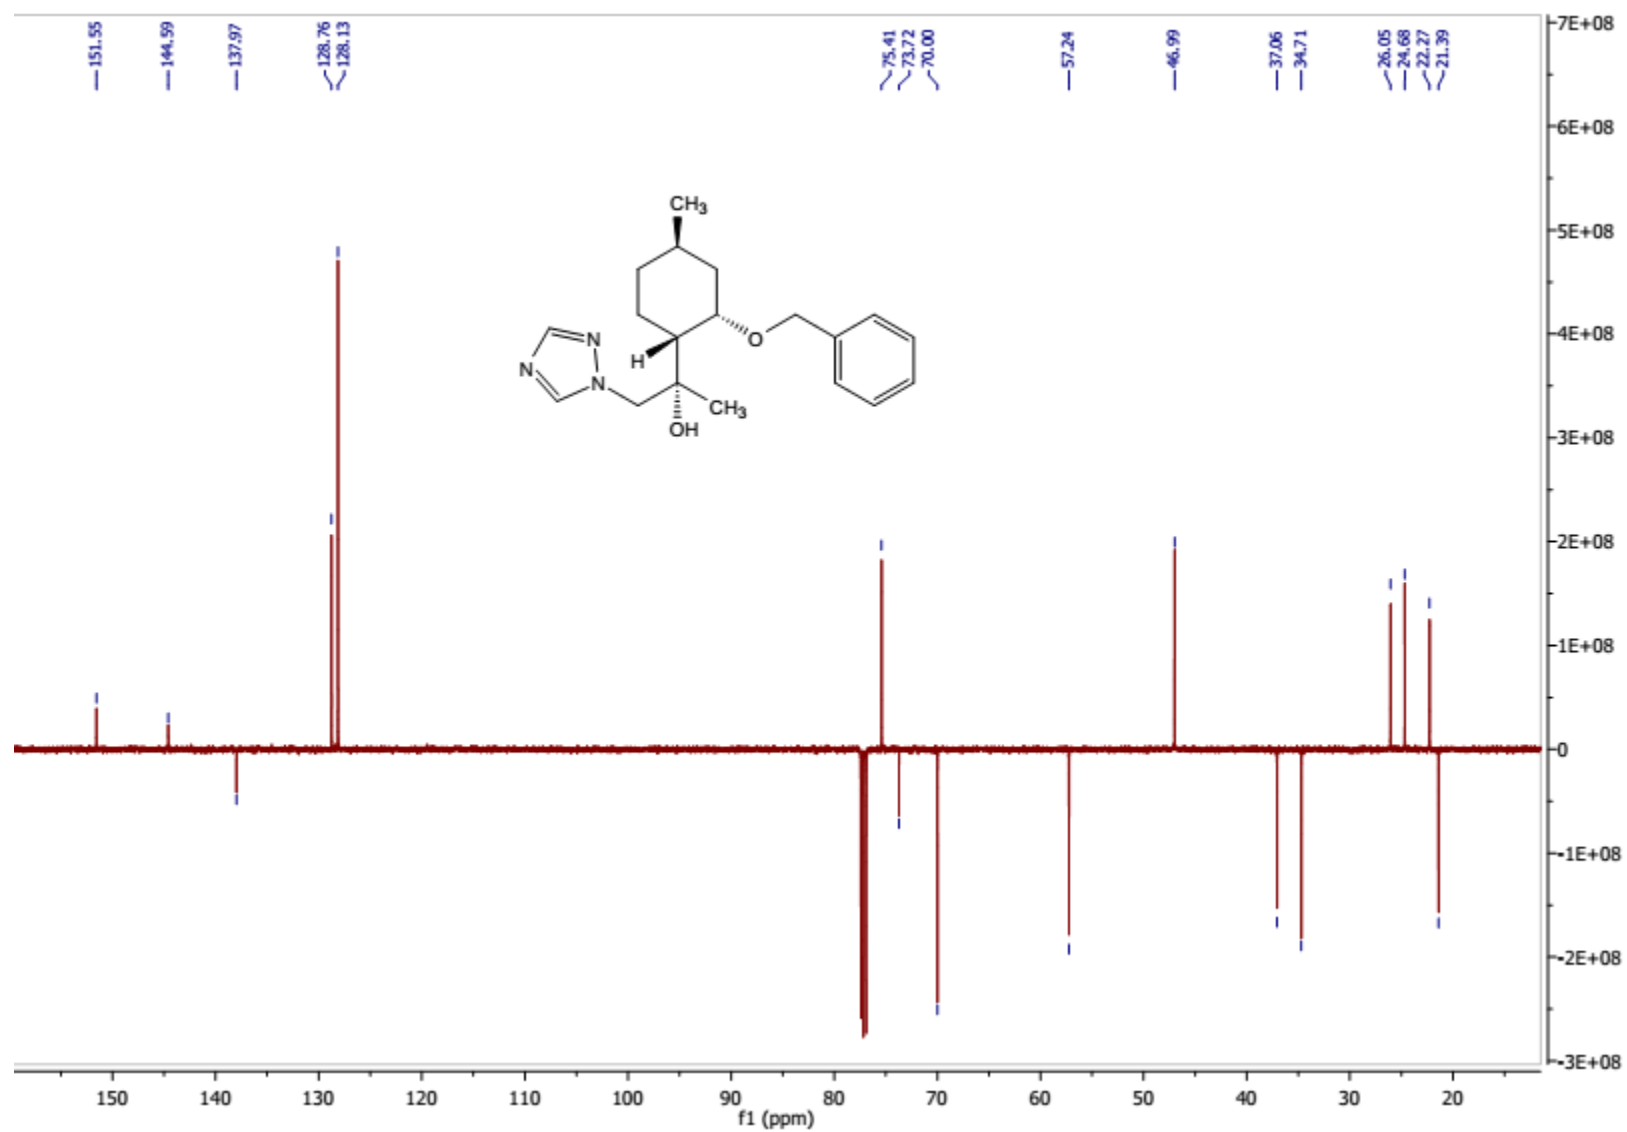

Figure S 22:  $^1\text{H}$ -NMR of compound 9a

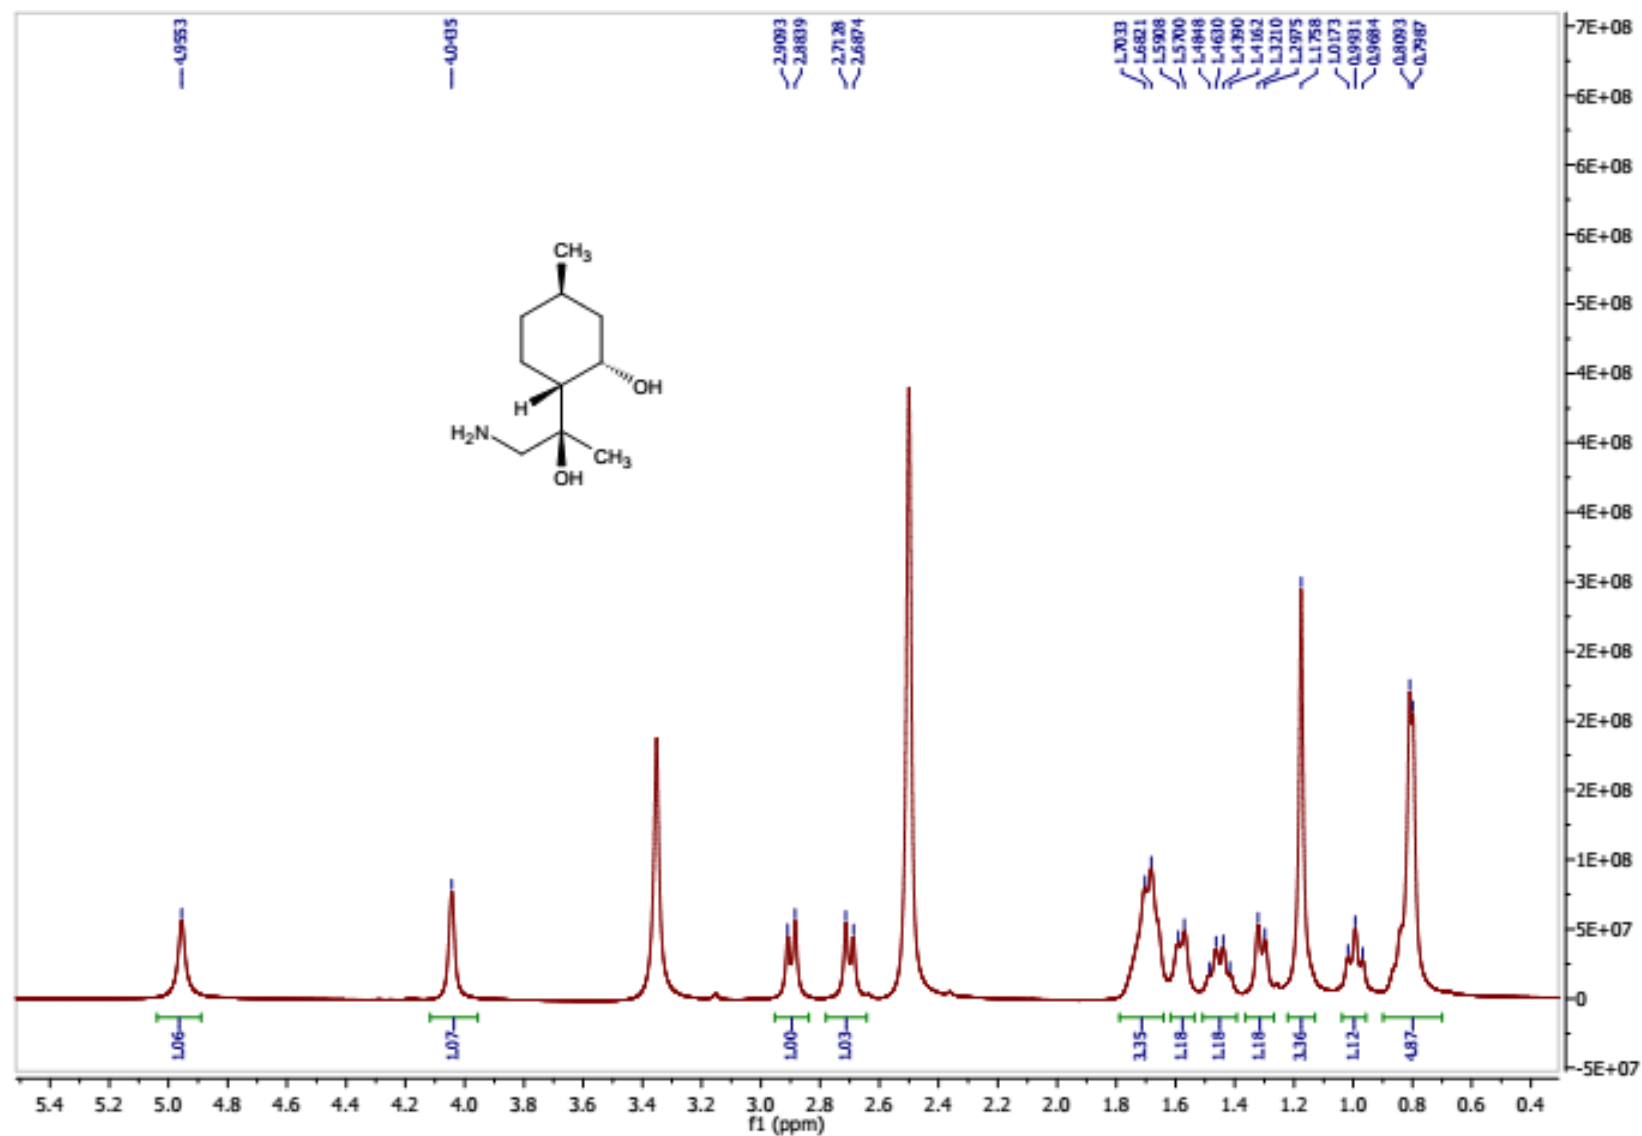

Figure S 23:  $^{13}\text{C}$ -NMR of compound **9a**

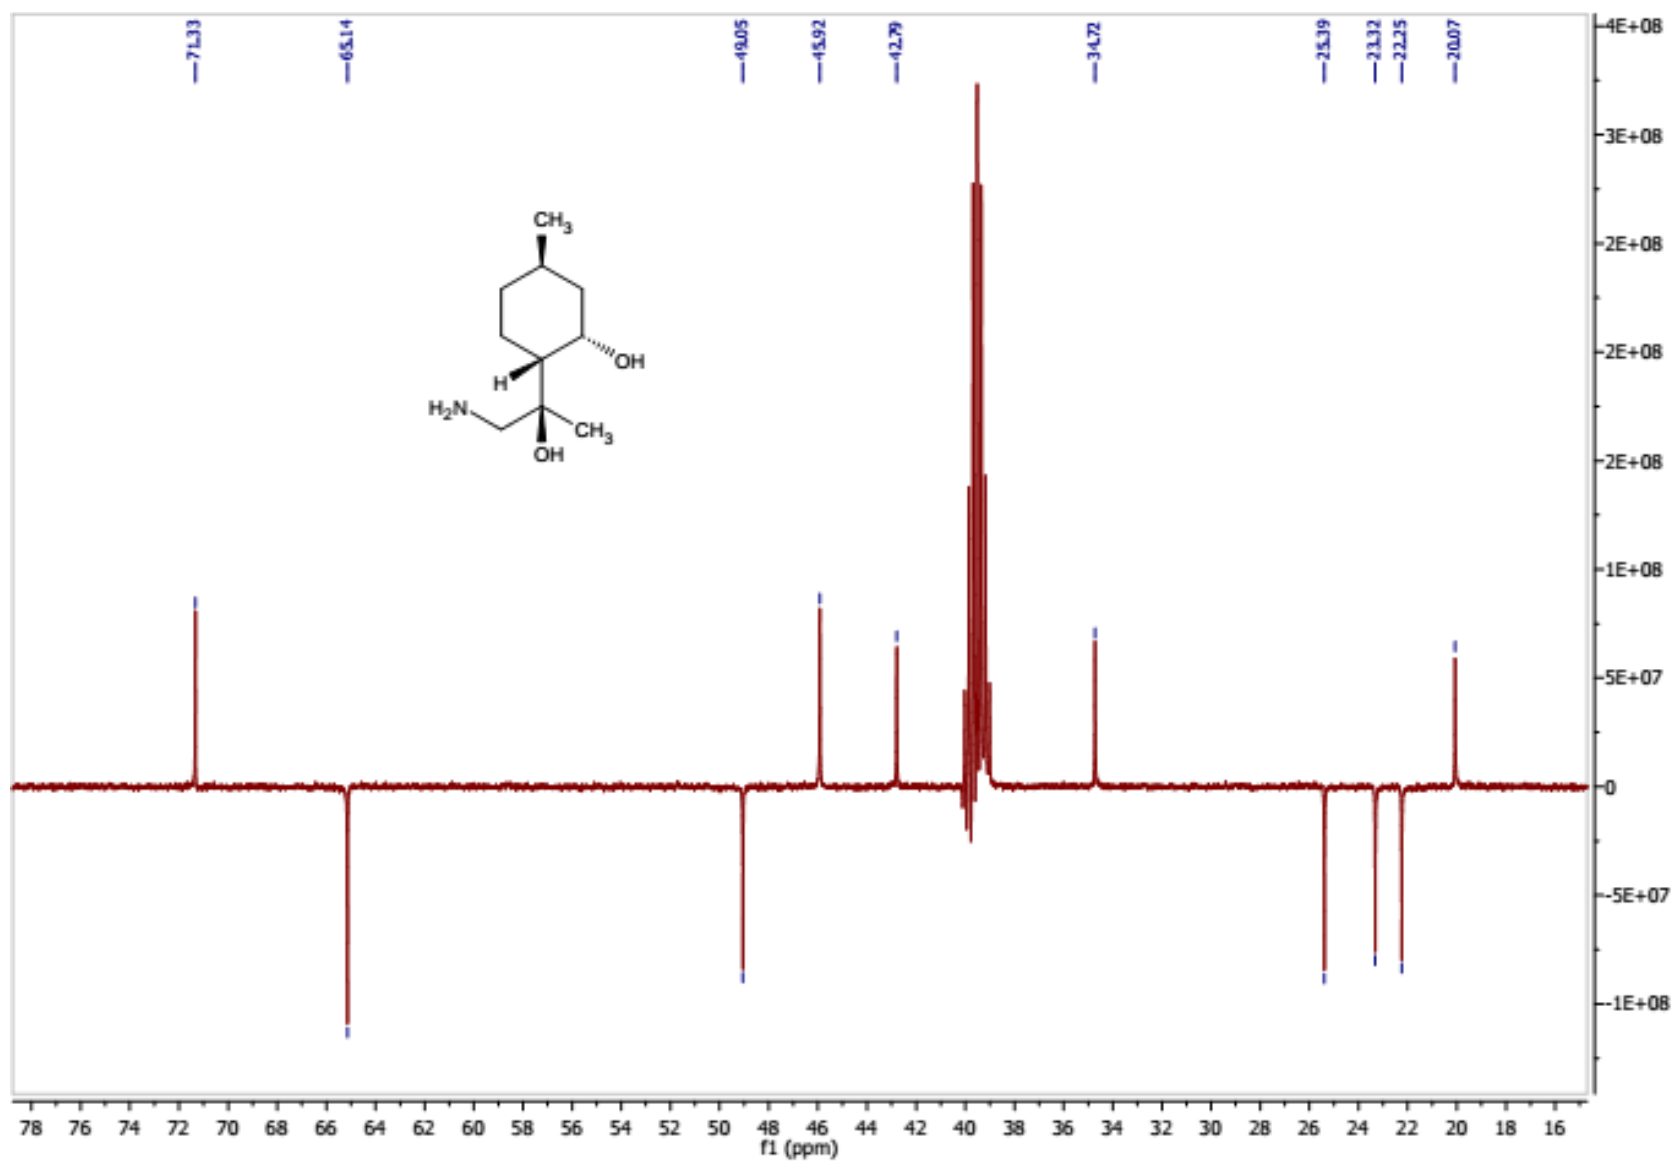

Figure S 24:  $^1\text{H}$ -NMR of compound **9b**

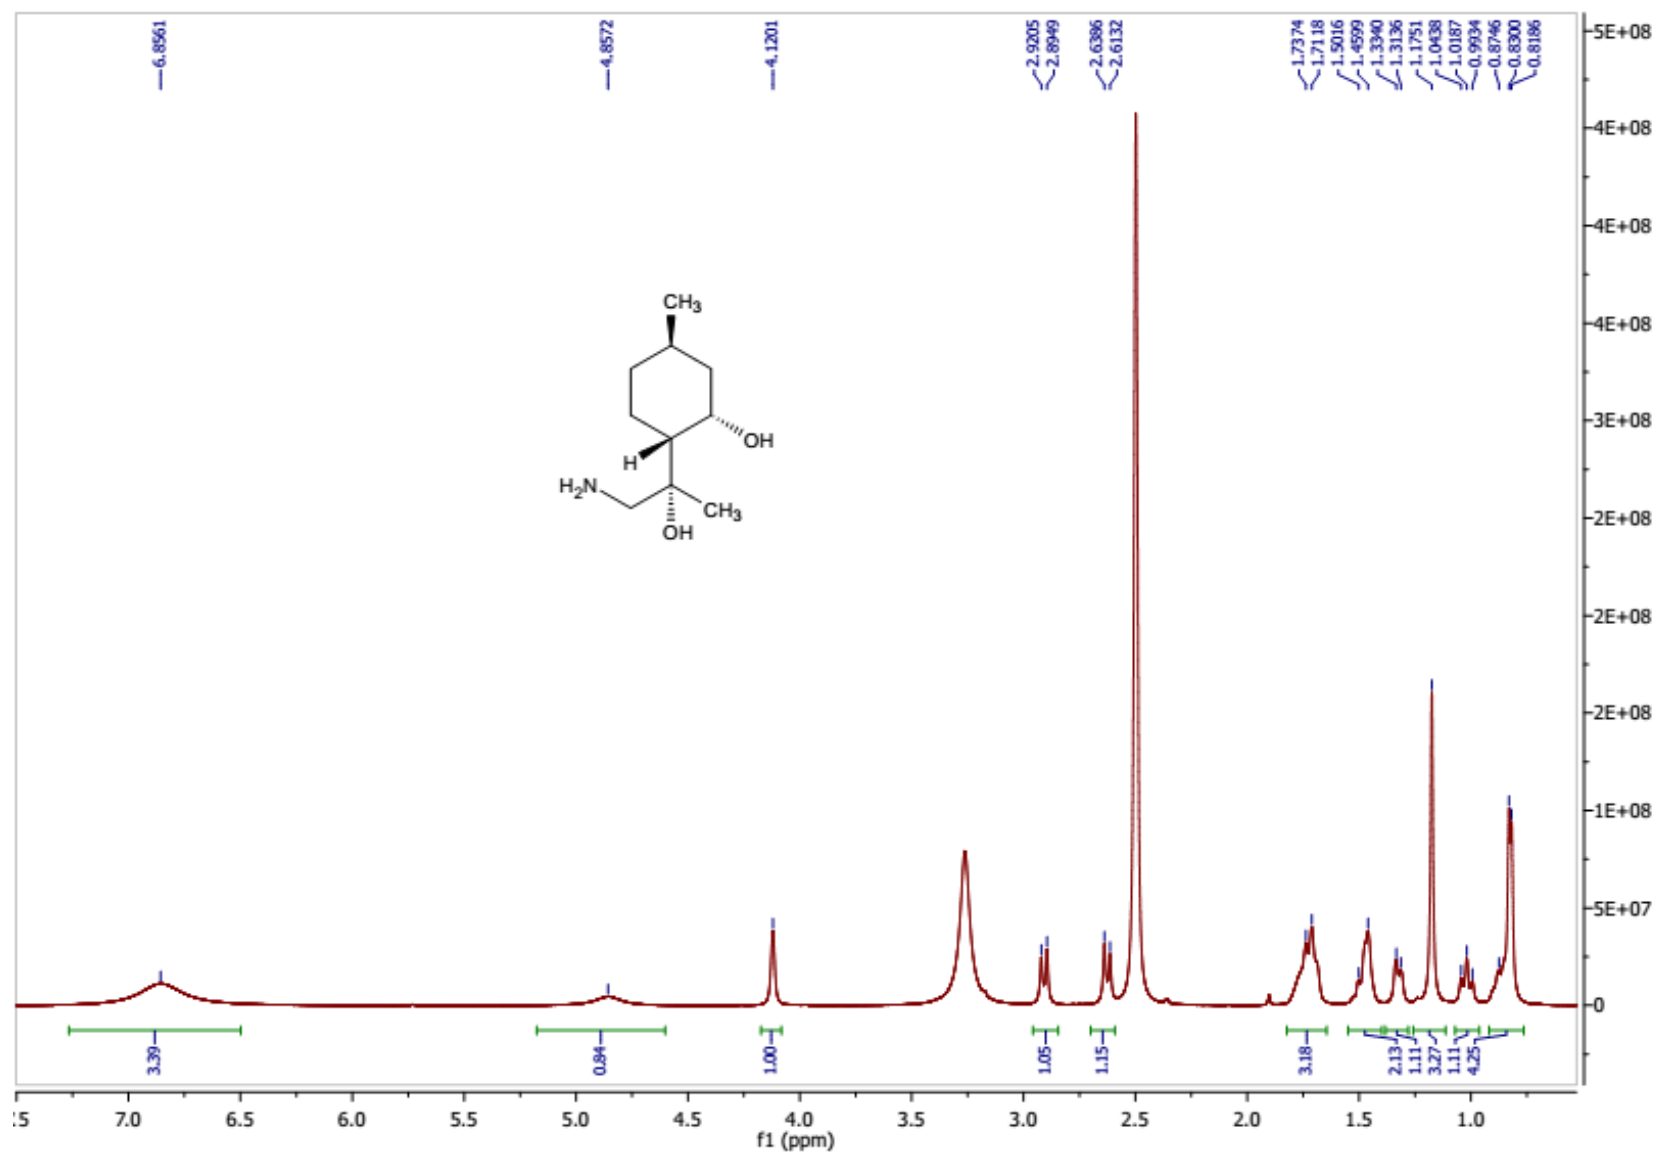

Figure S 25:  $^{13}\text{C}$ -NMR of compound **9b**

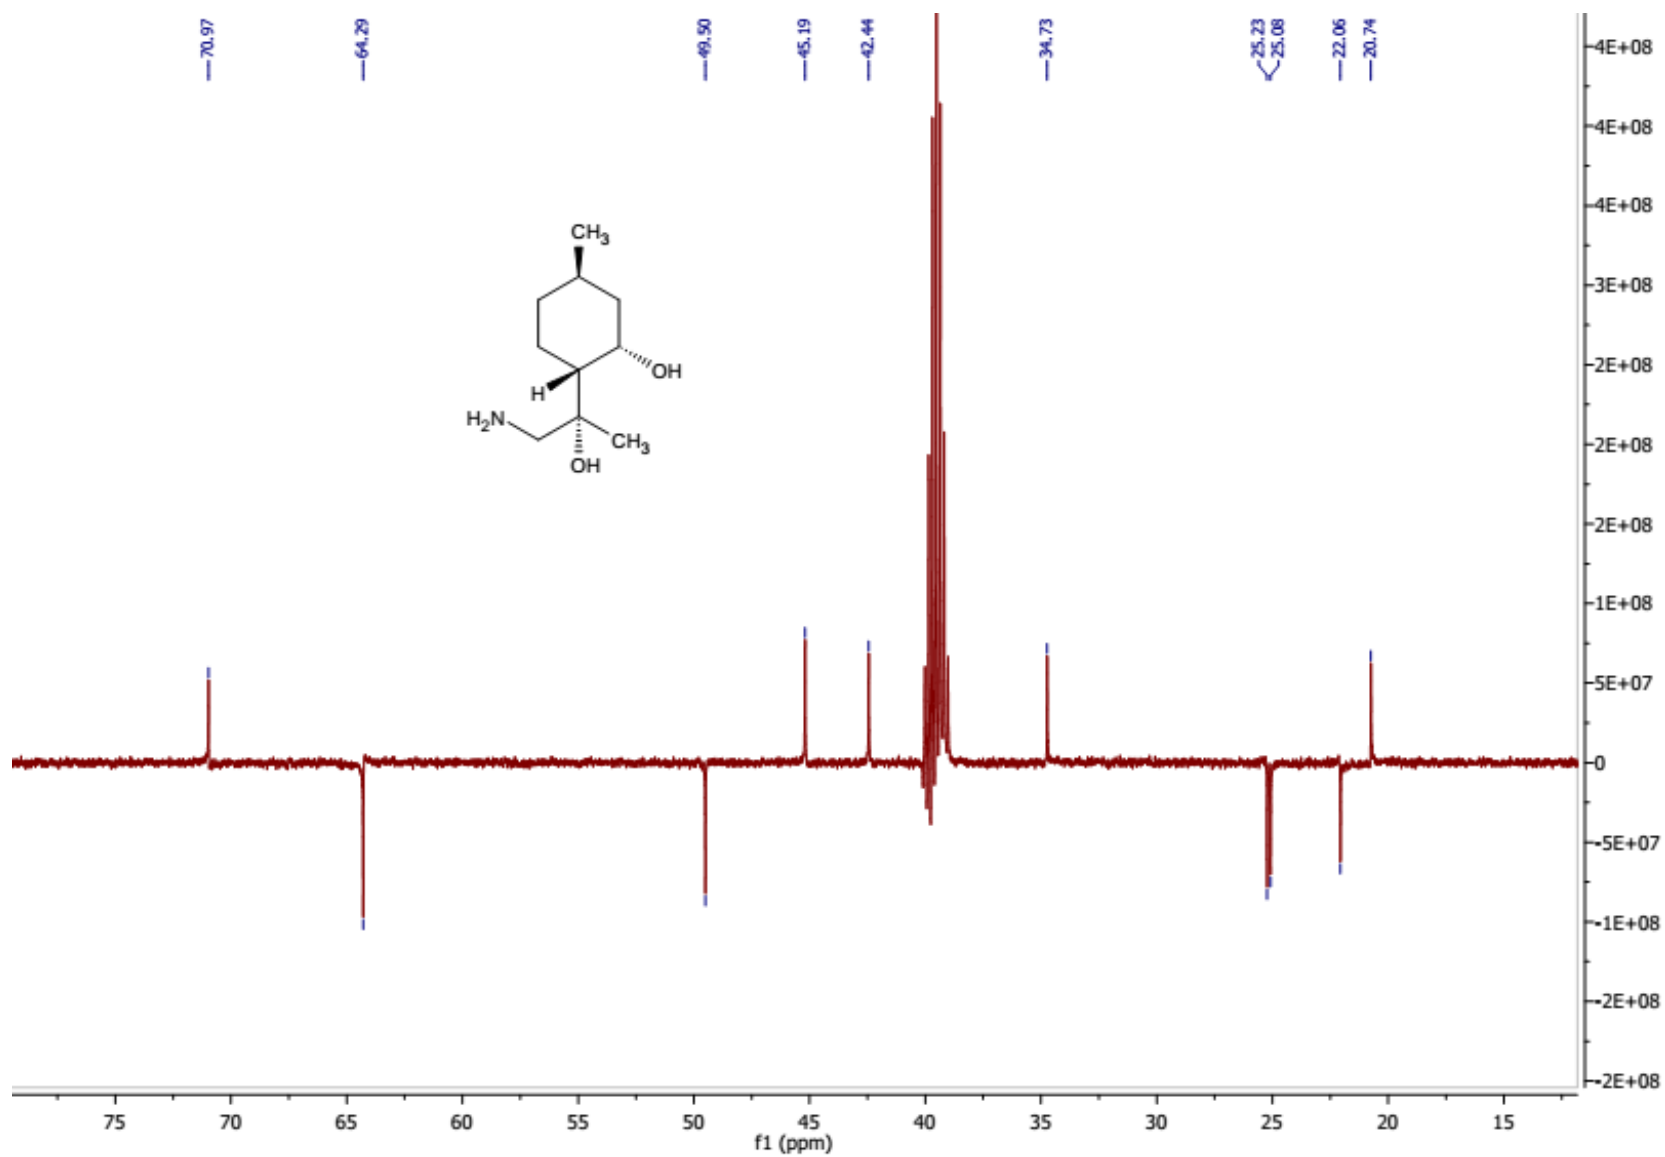



Figure S 26:  $^1\text{H}$ -NMR of compound **10**

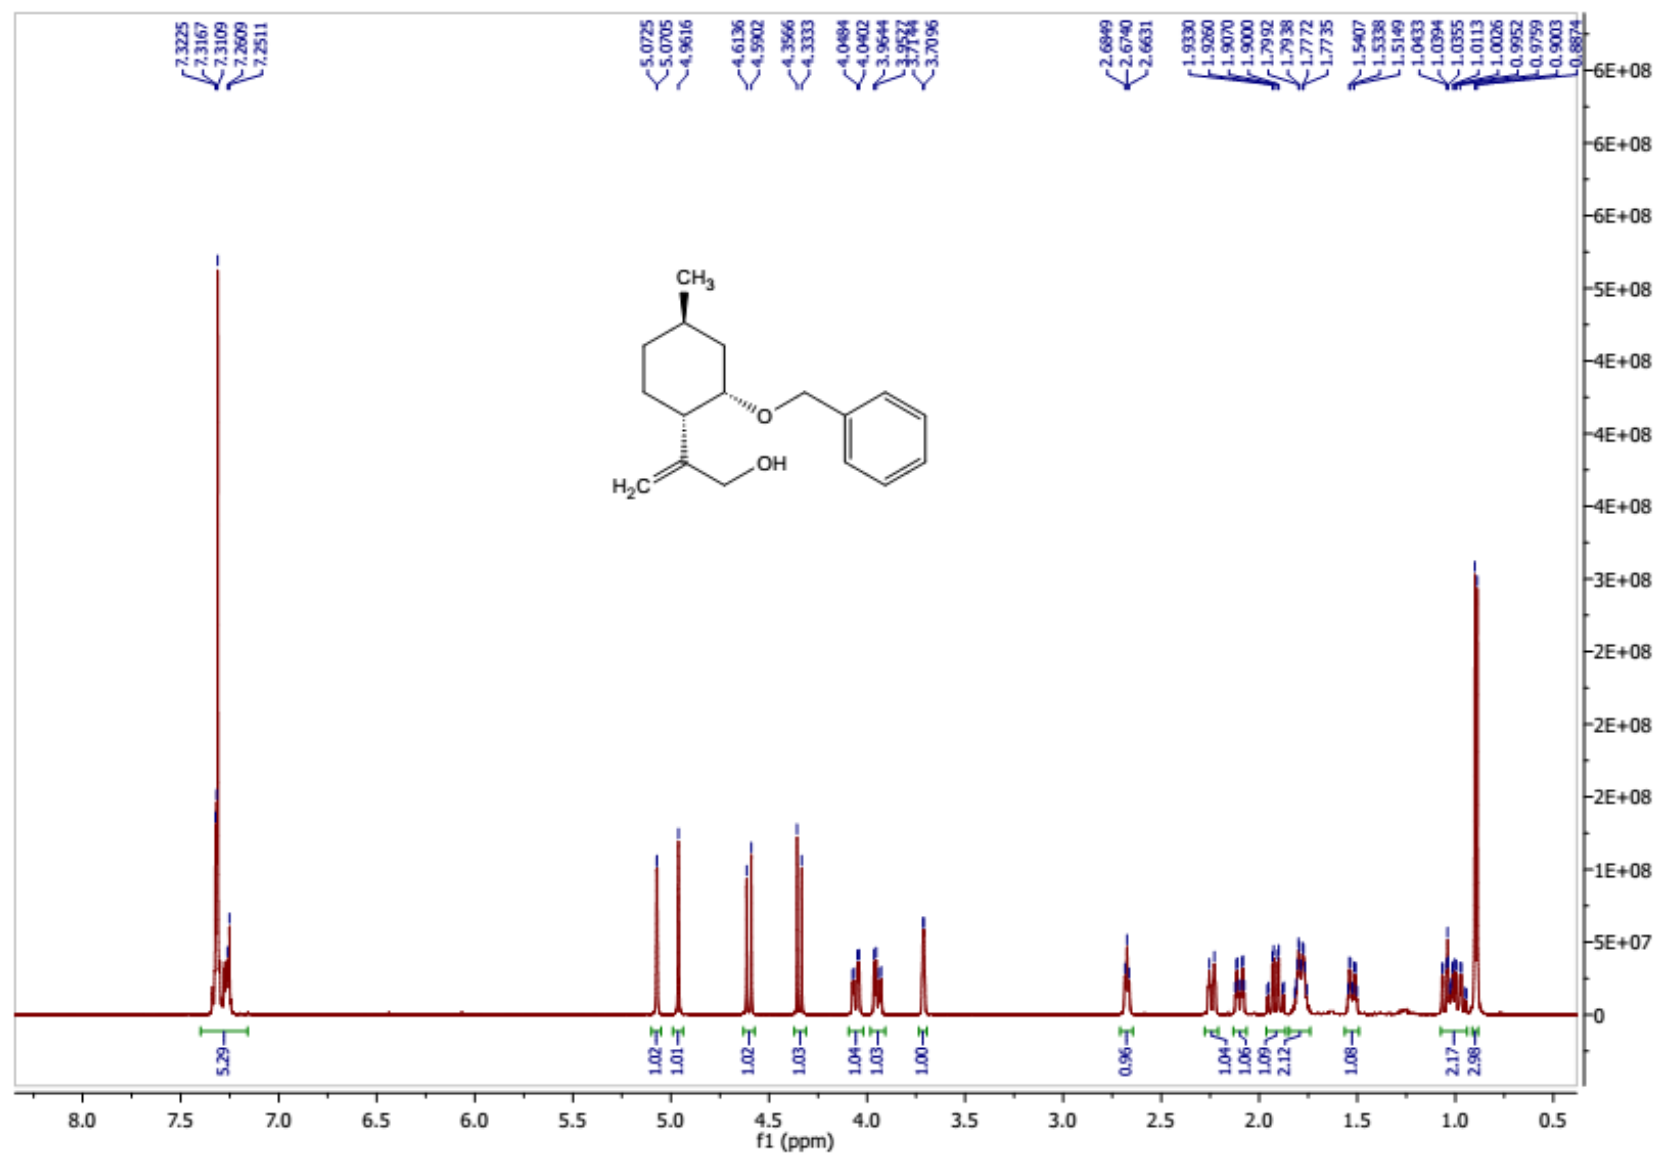

Figure S 27:  $^{13}\text{C}$ -NMR of compound **10**

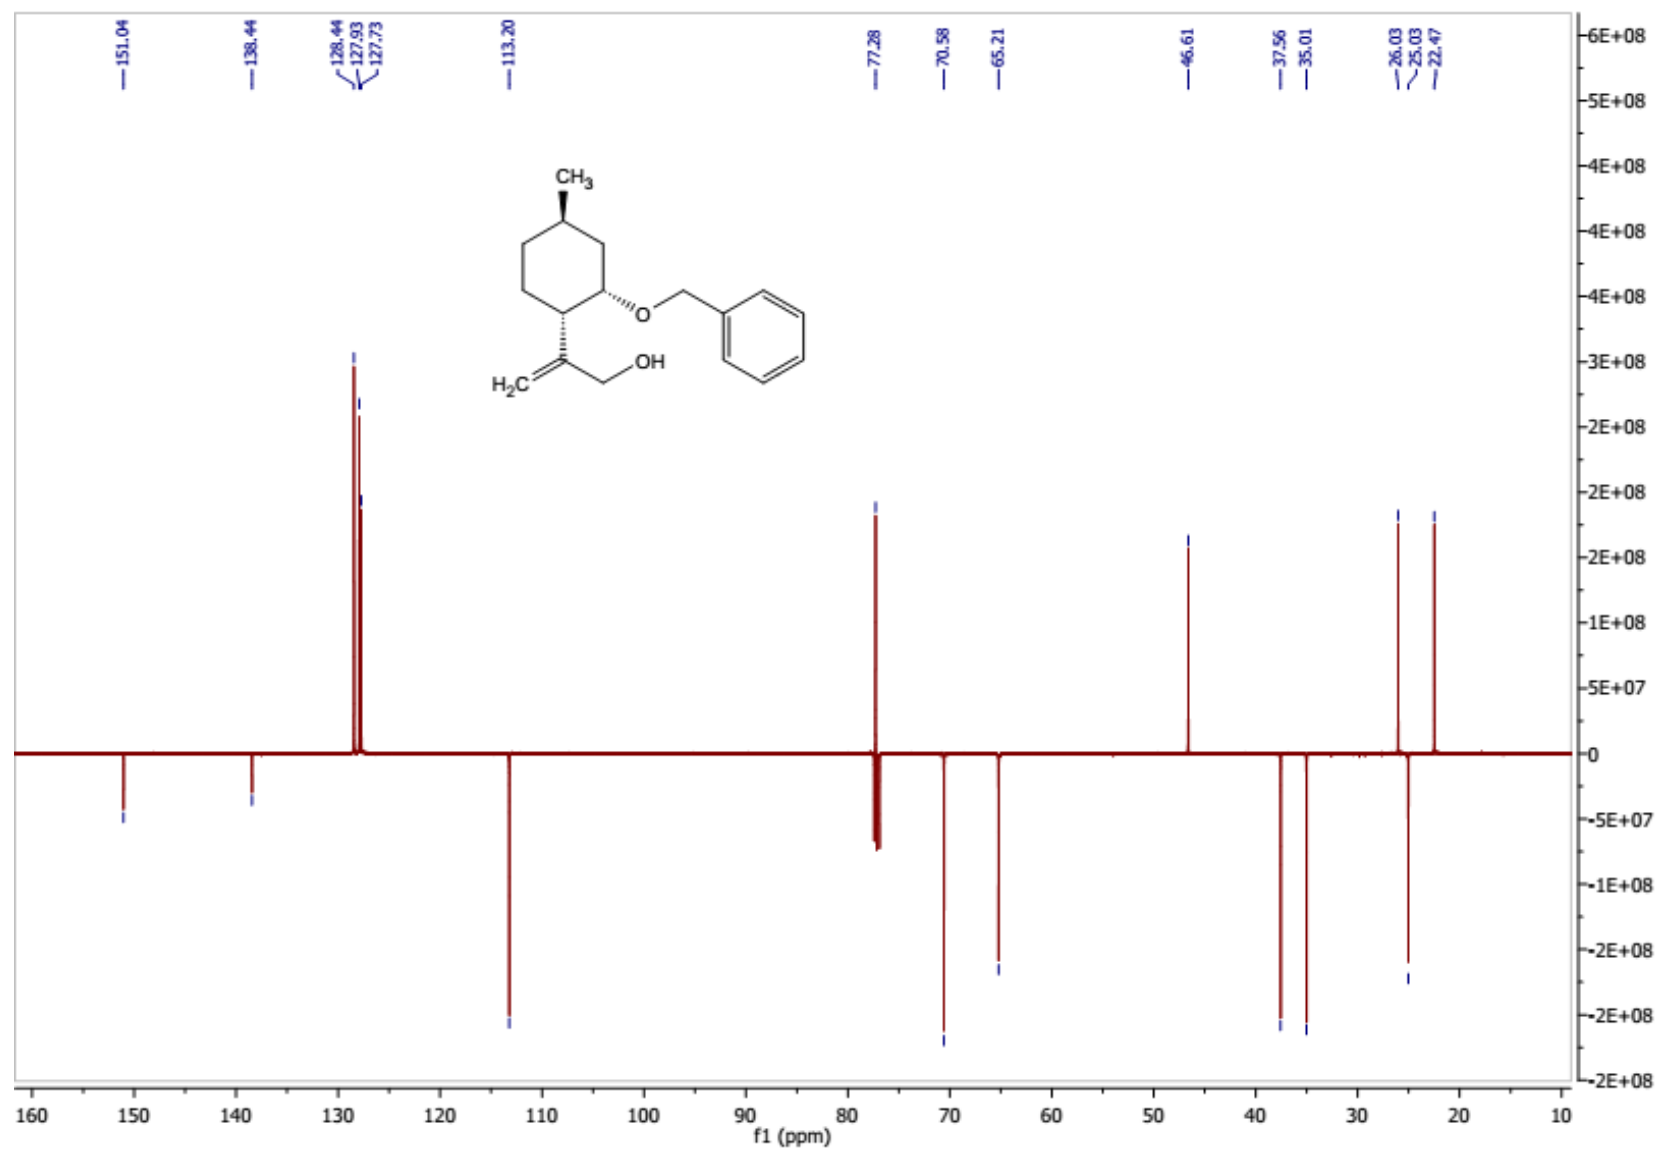

Figure S 28:  $^1\text{H}$ -NMR of compound **12a**

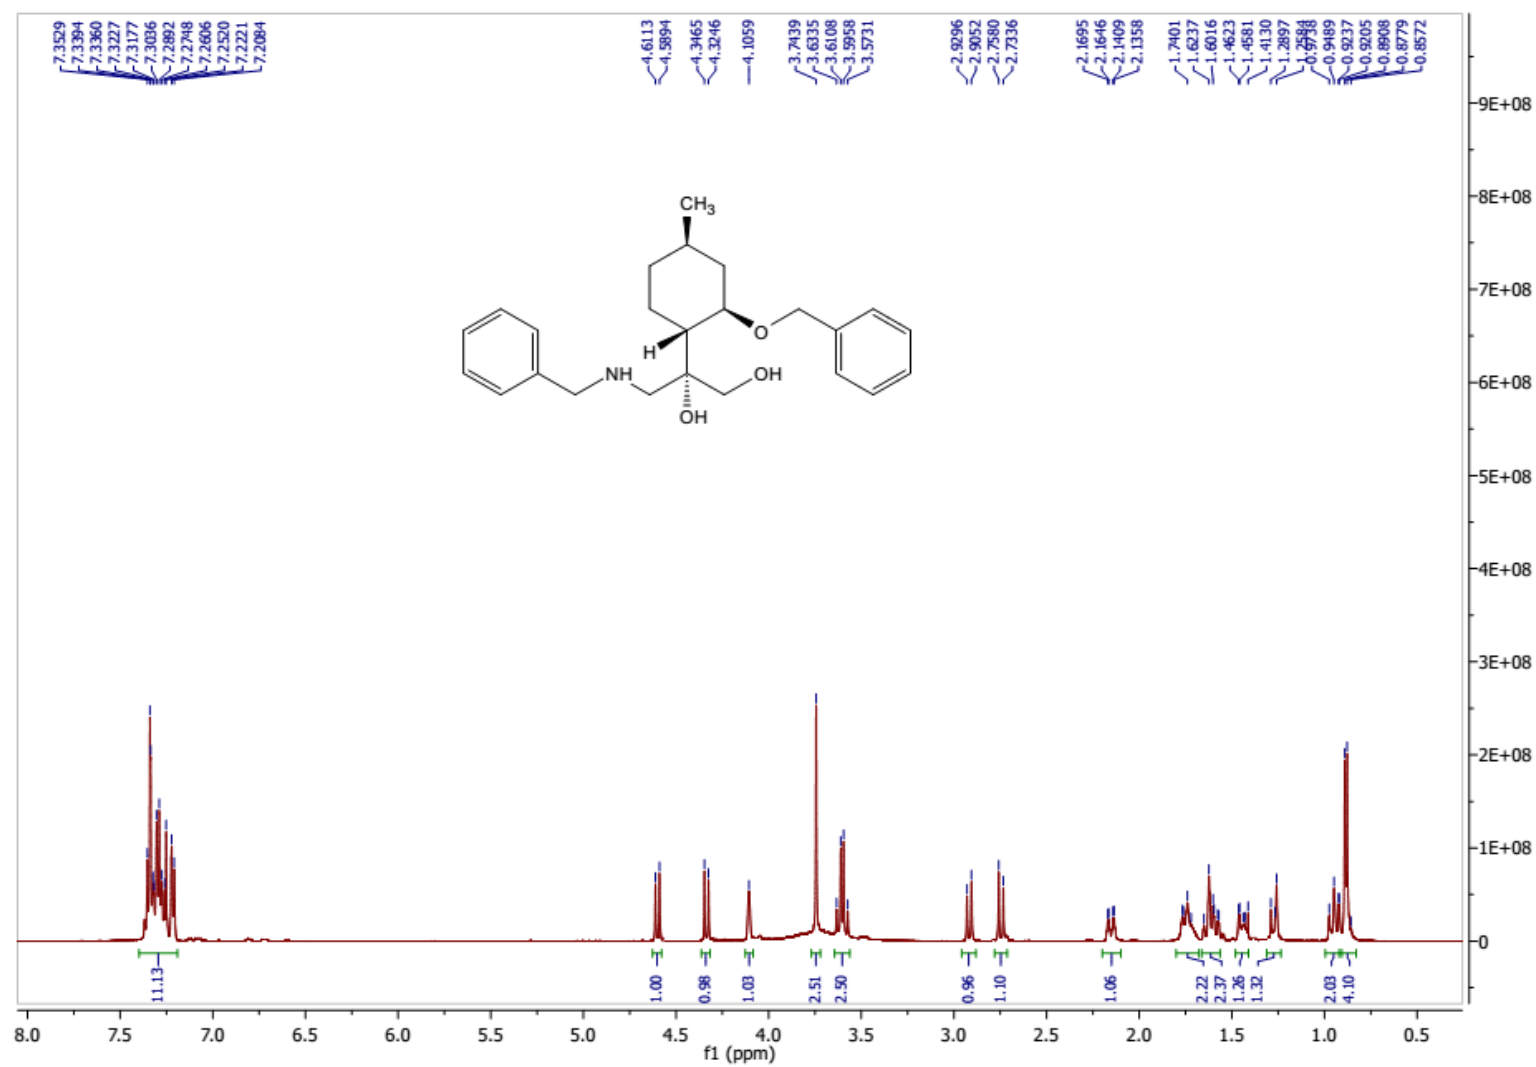

Figure S 29:  $^{13}\text{C}$ -NMR of compound **12a**

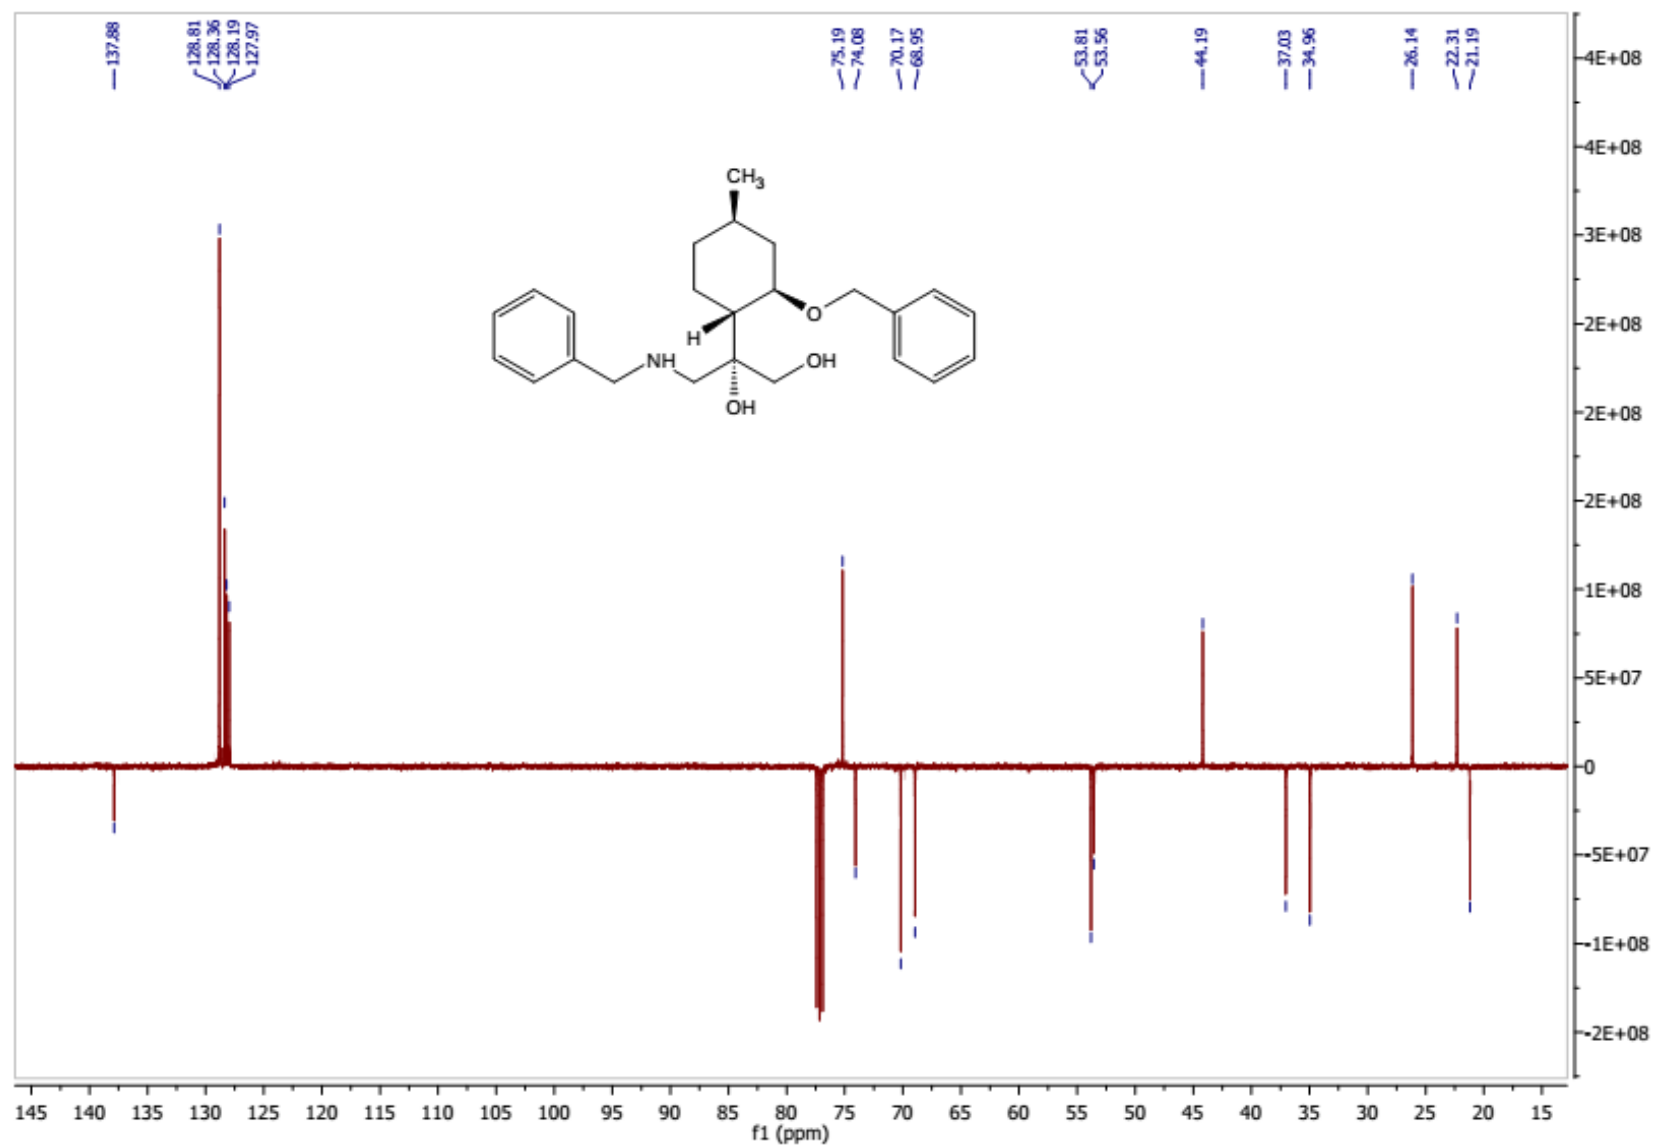

Figure S 30:  $^1\text{H}$ -NMR of compound **12b**

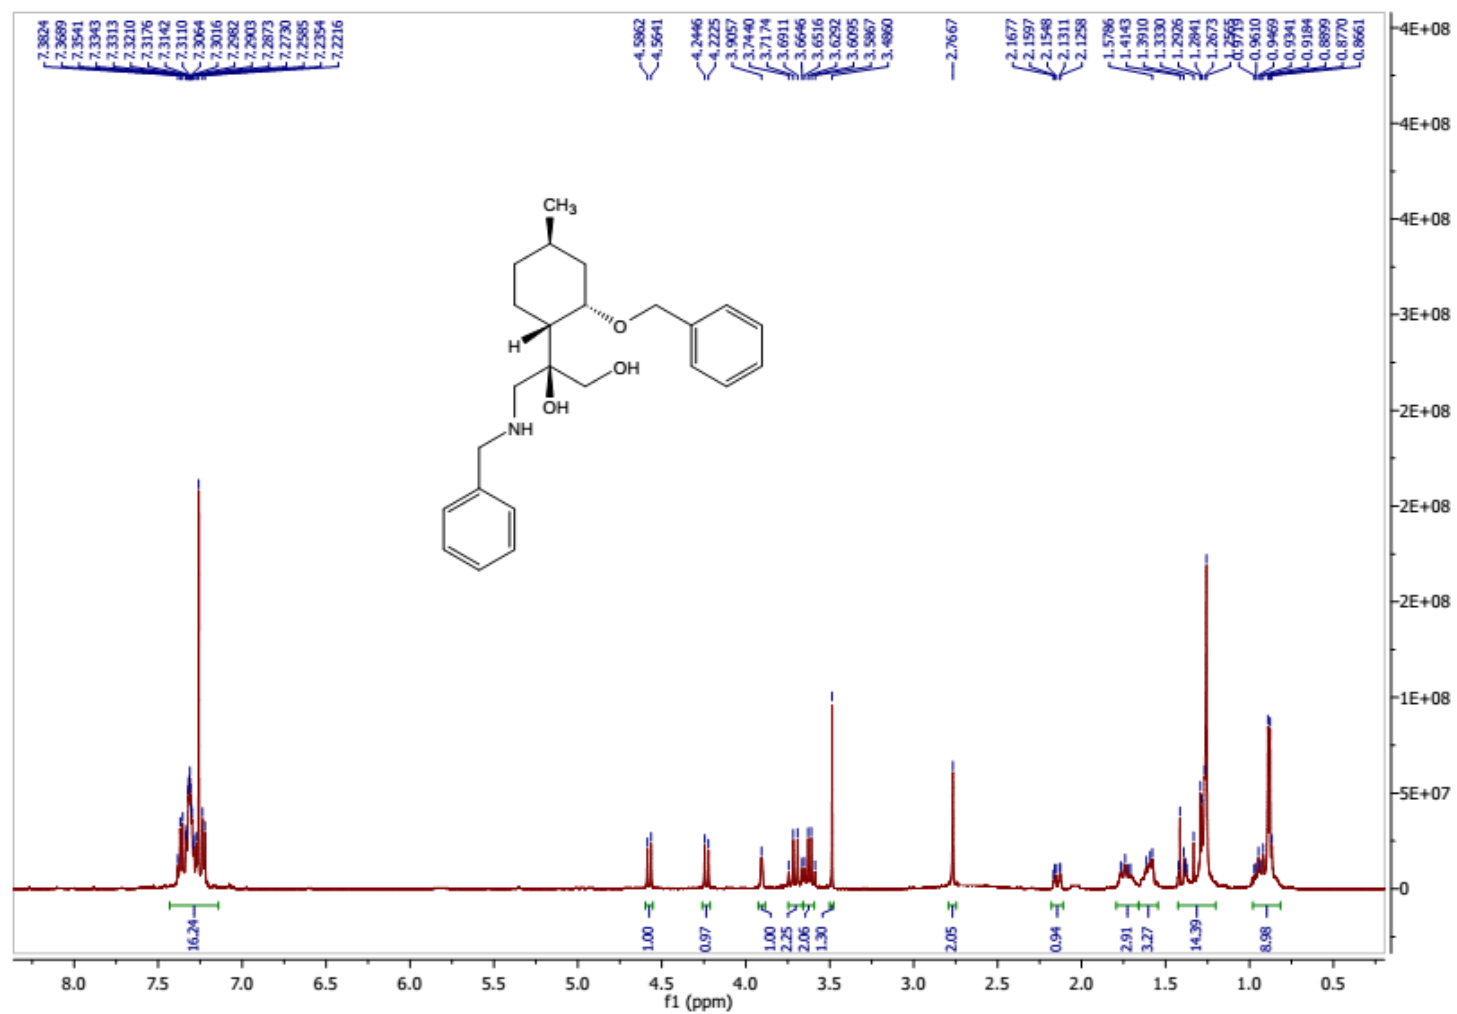

Figure S 31:  $^{13}\text{C}$ -NMR of compound **12b**

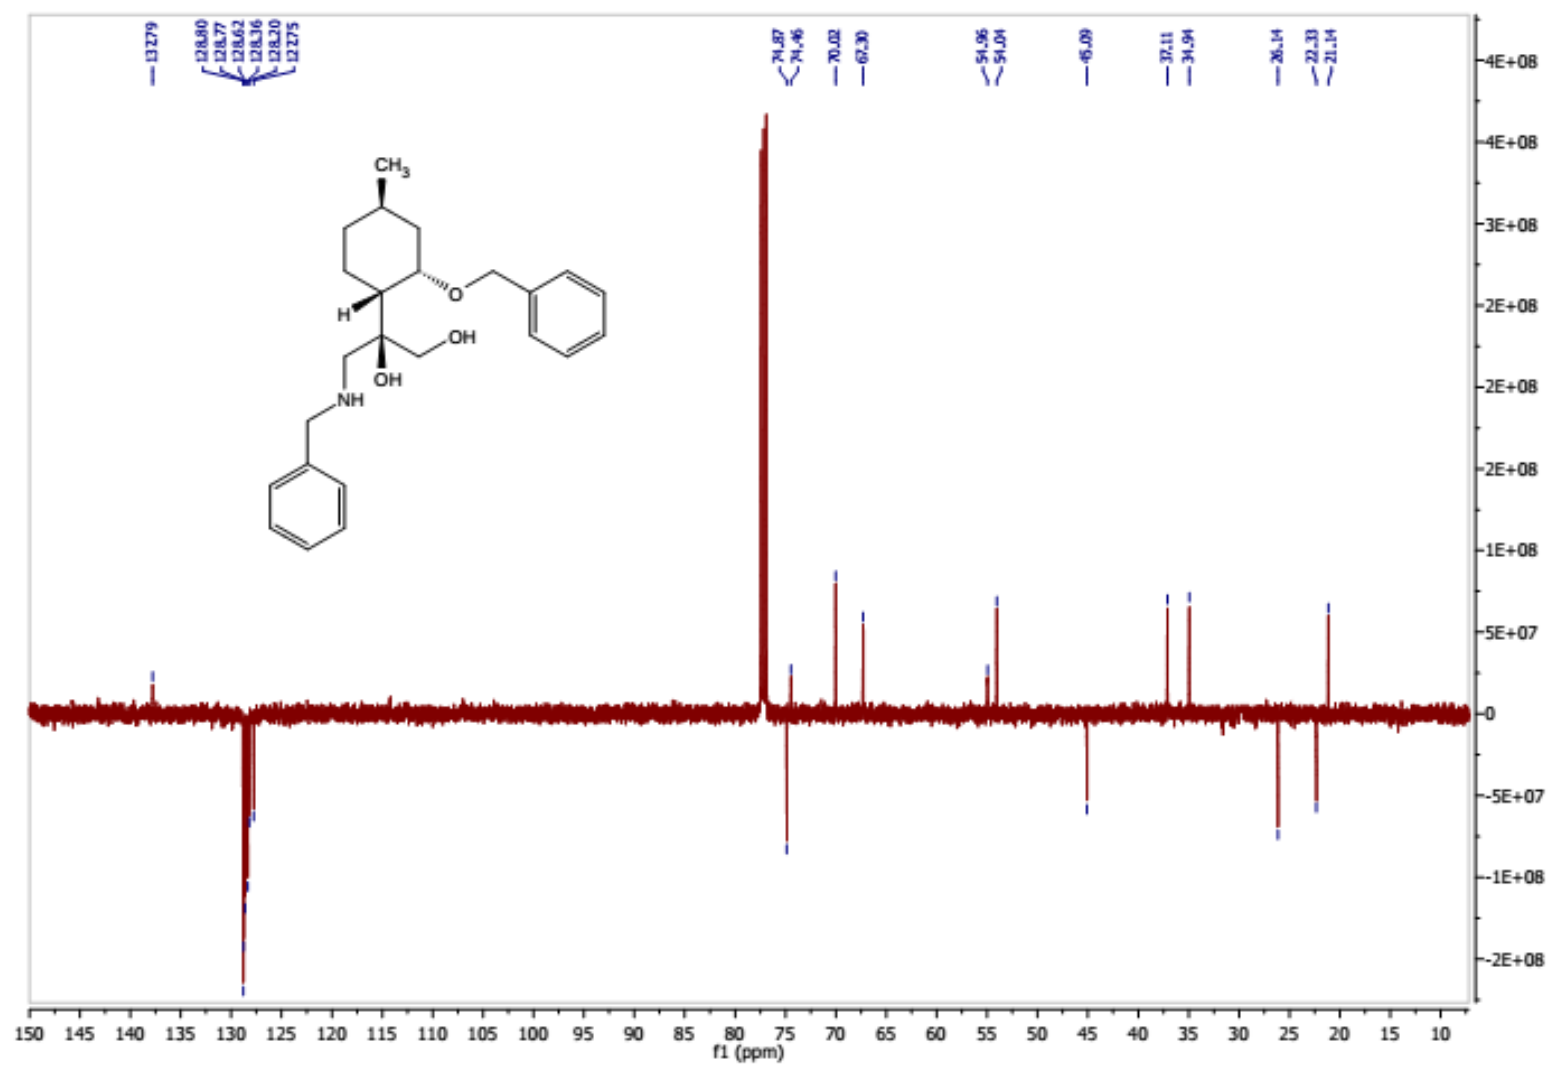

Figure S 32:  $^1\text{H}$ -NMR of compound **13a**

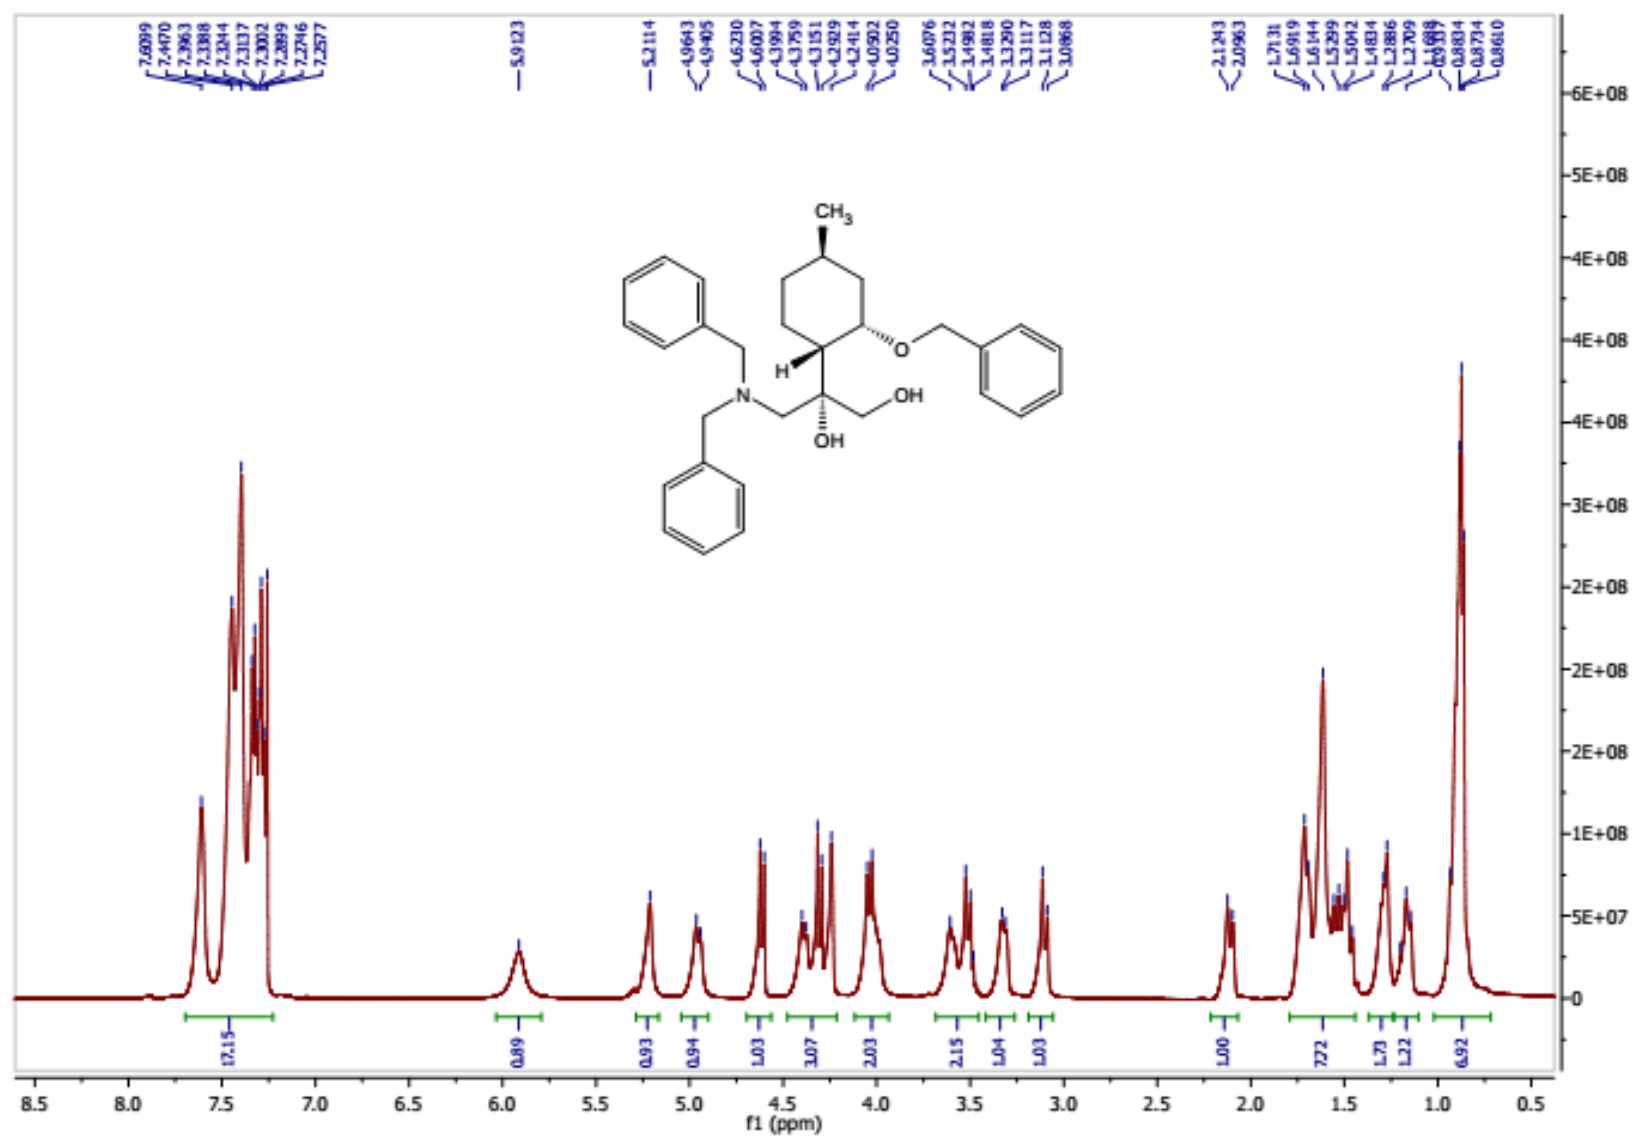

Figure S 33:  $^{13}\text{C}$ -NMR of compound **13a**

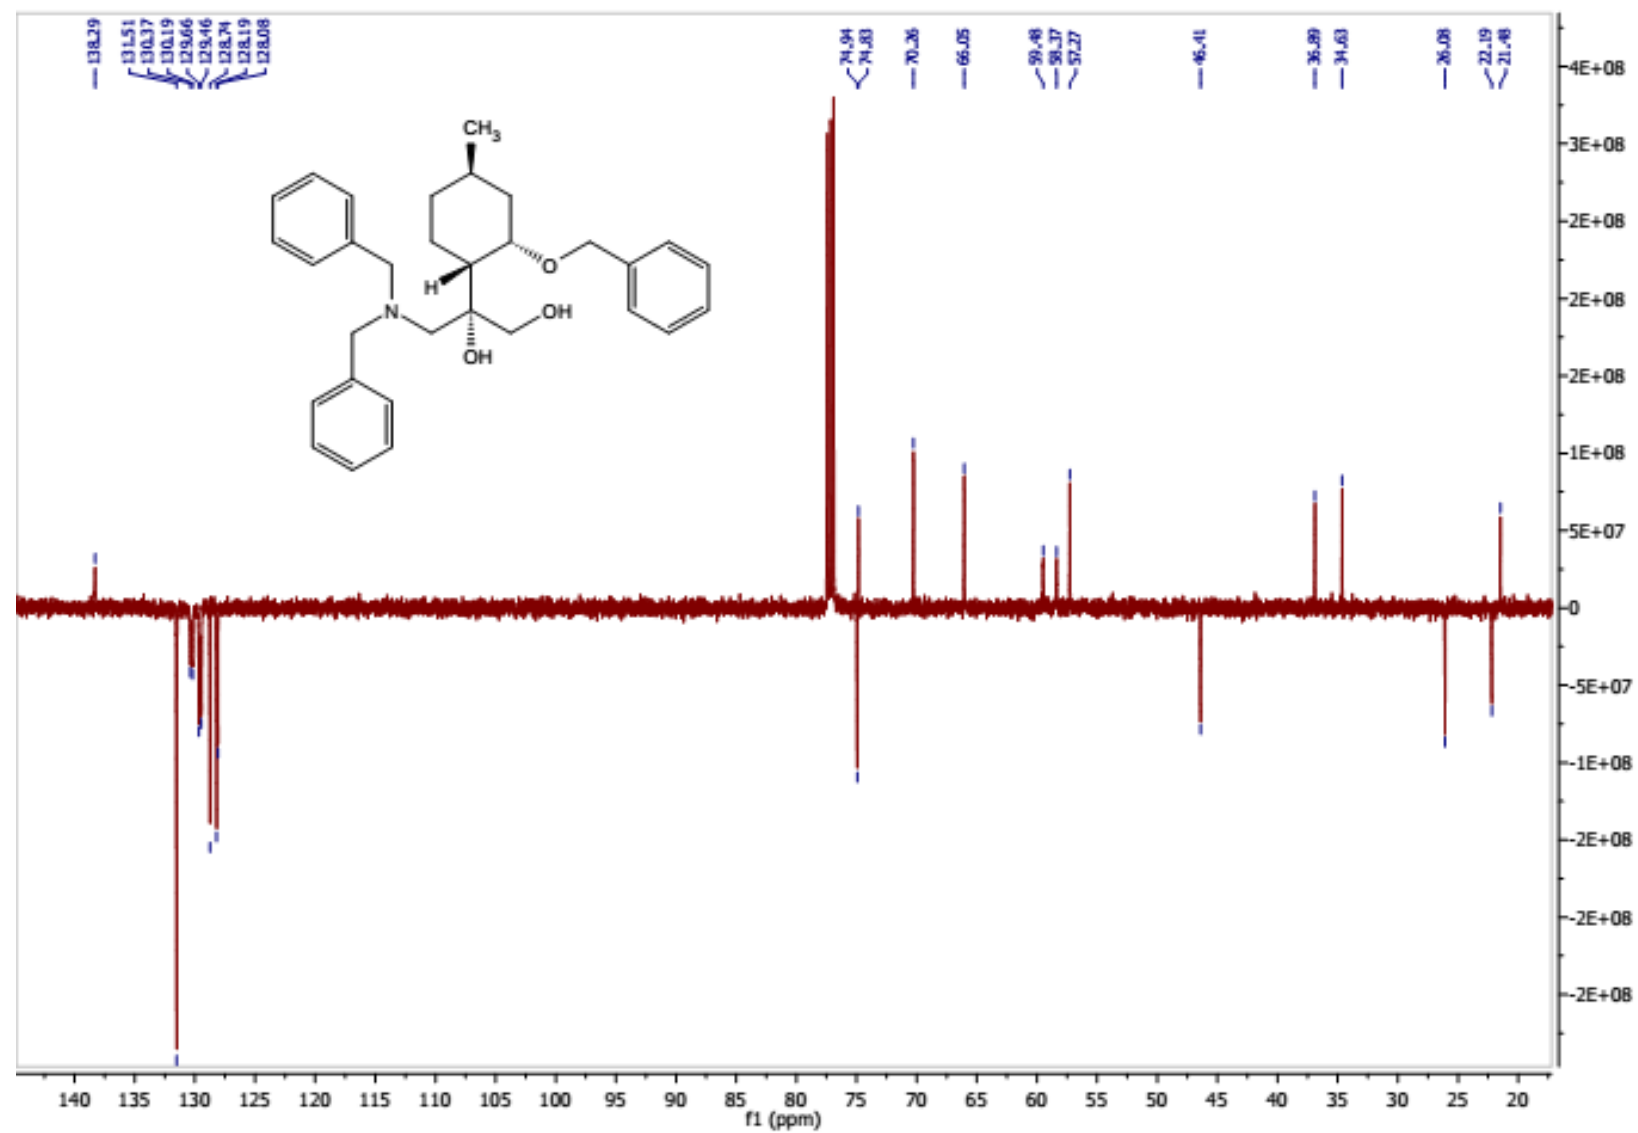



Figure S 34:  $^1\text{H}$ -NMR of compound **13b**

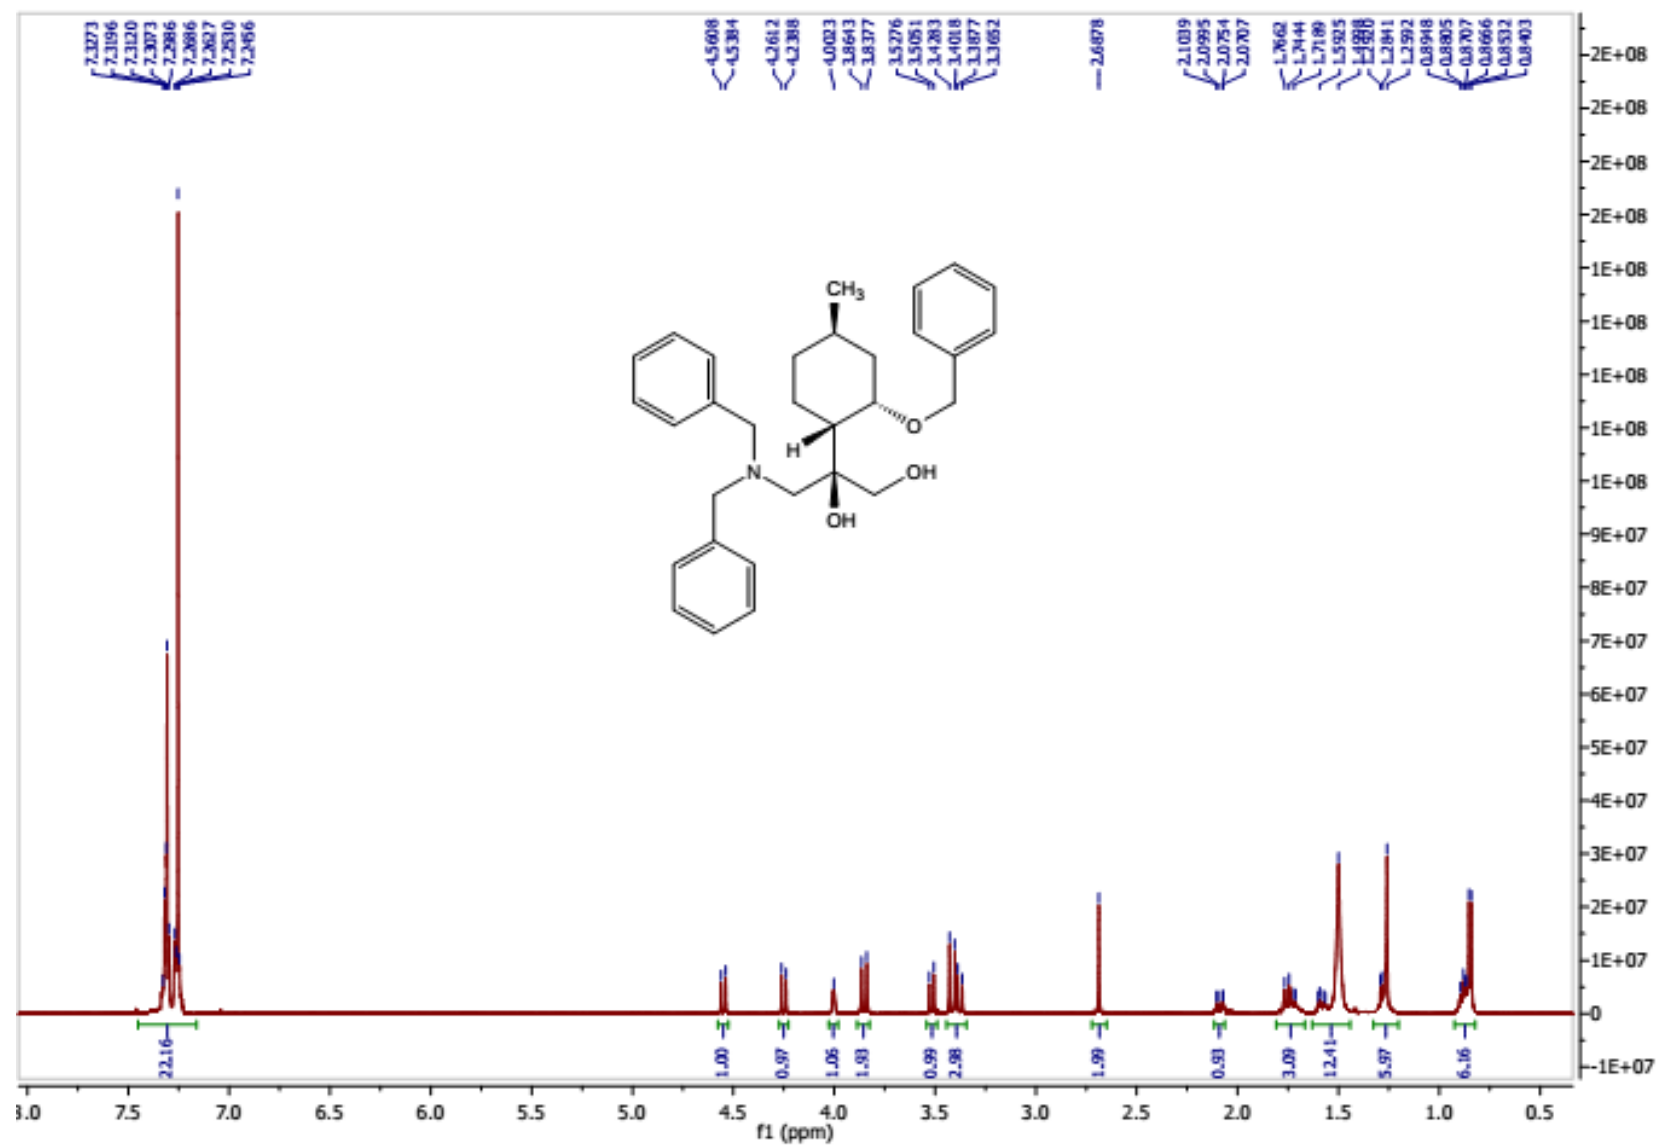

Figure S 35:  $^{13}\text{C}$ -NMR of compound **13b**

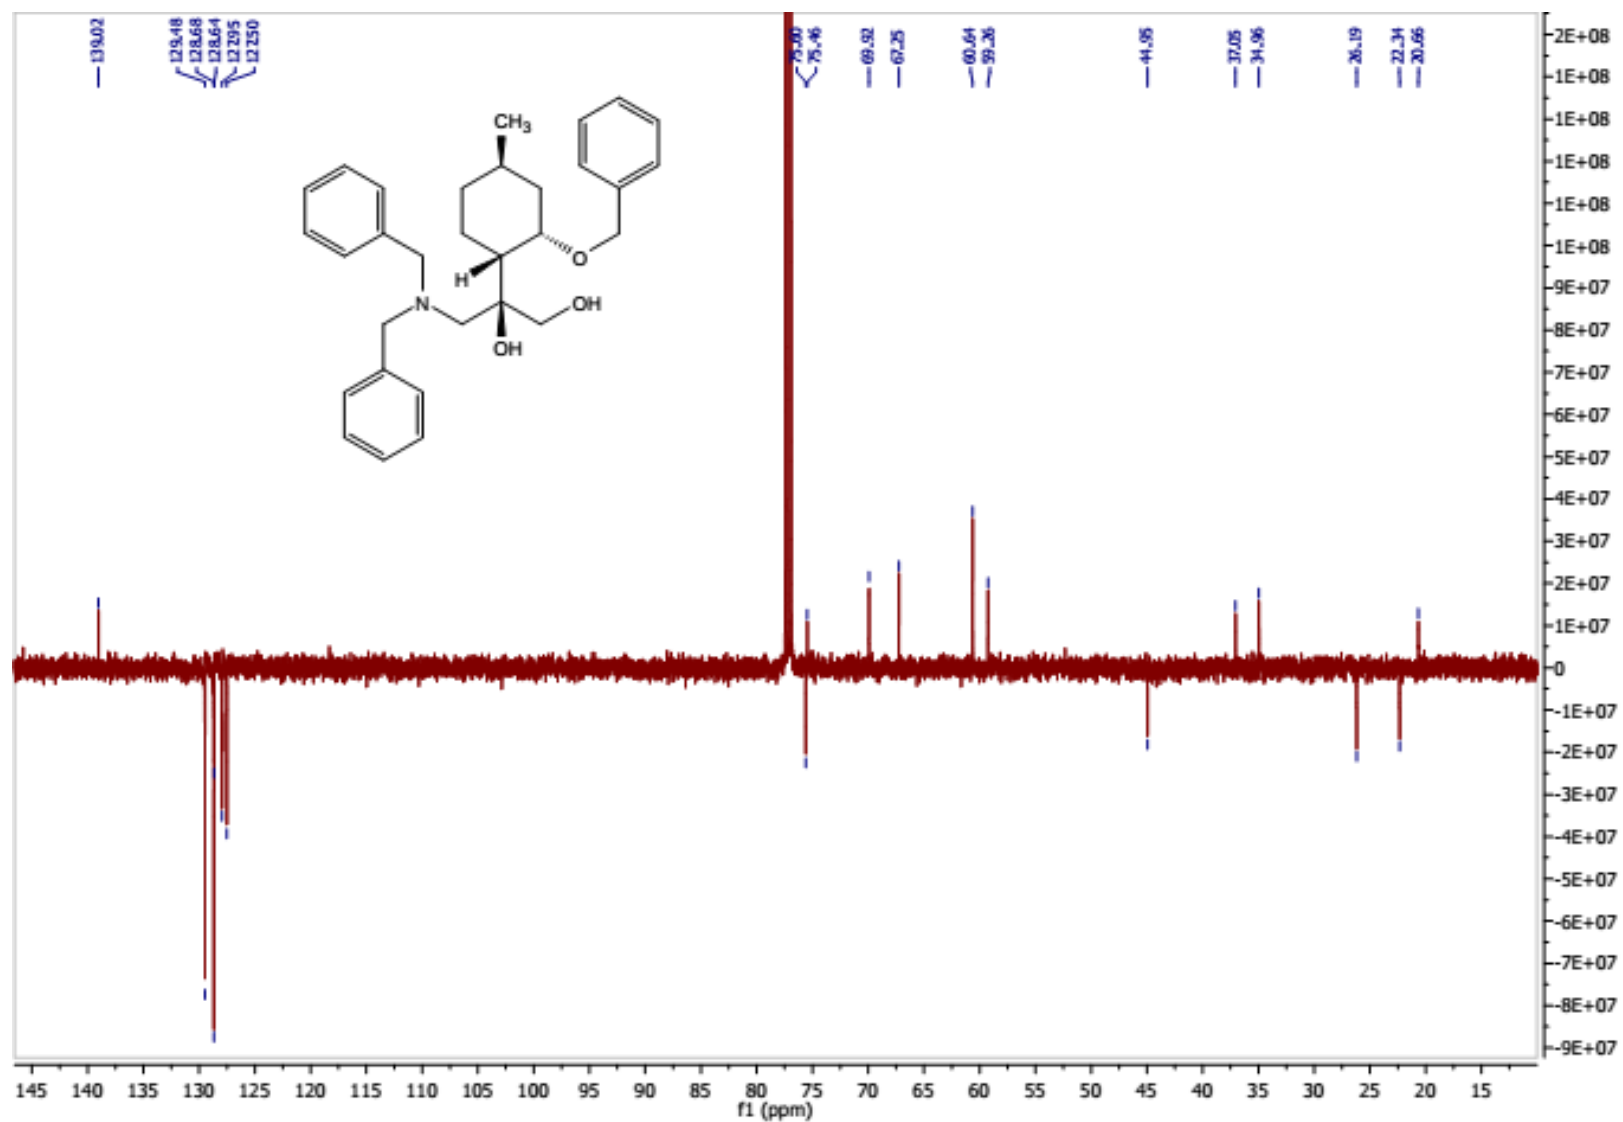

Figure S 36:  $^1\text{H}$ -NMR of compound **14a**

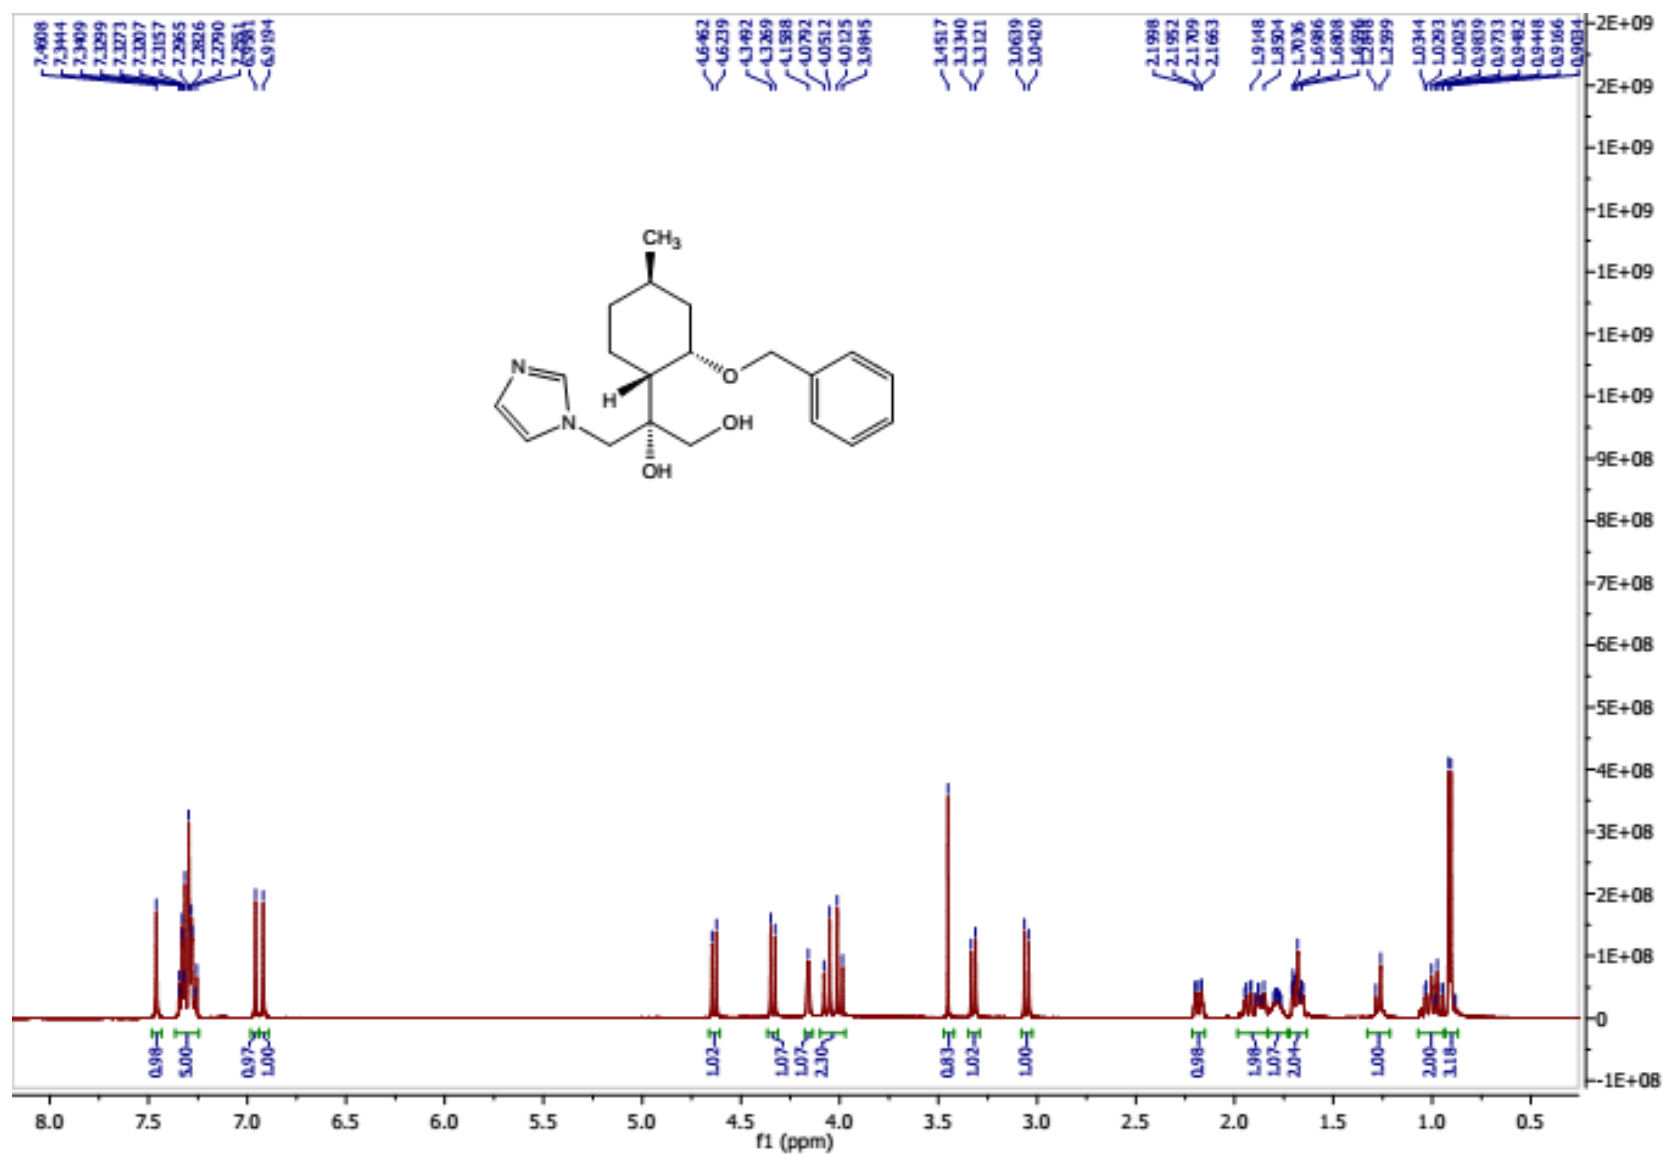

Figure S 37:  $^{13}\text{C}$ -NMR of compound **14a**

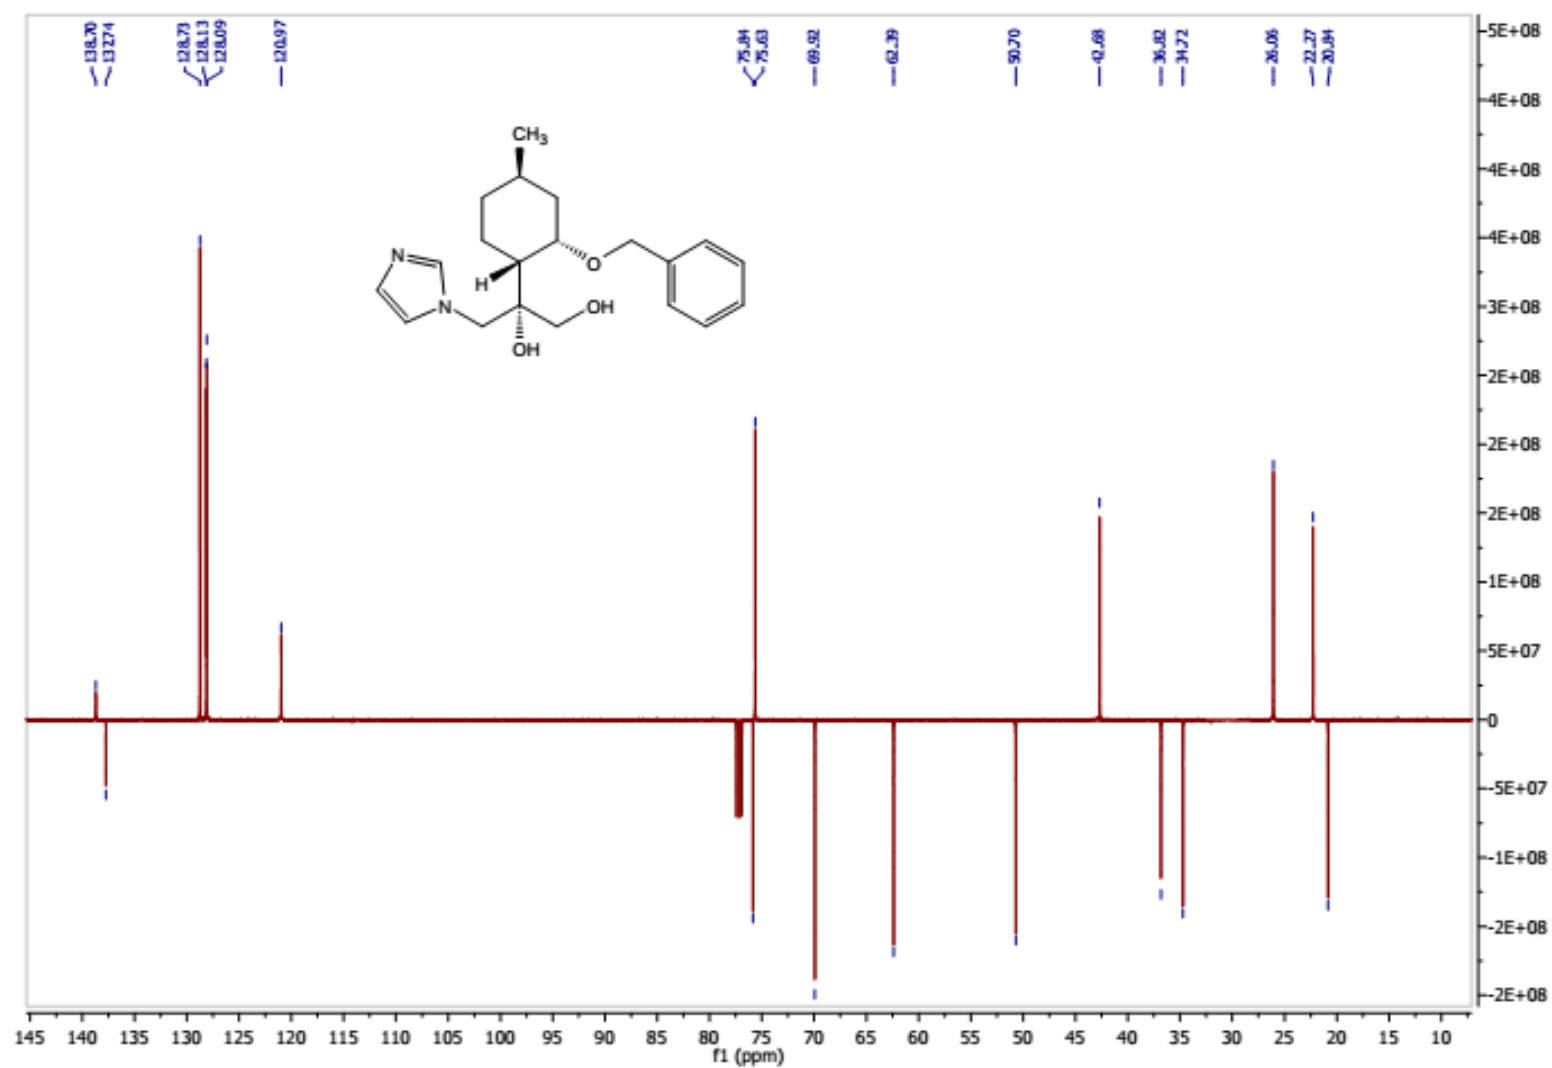

Figure S 38:  $^1\text{H}$ -NMR of compound **15a**

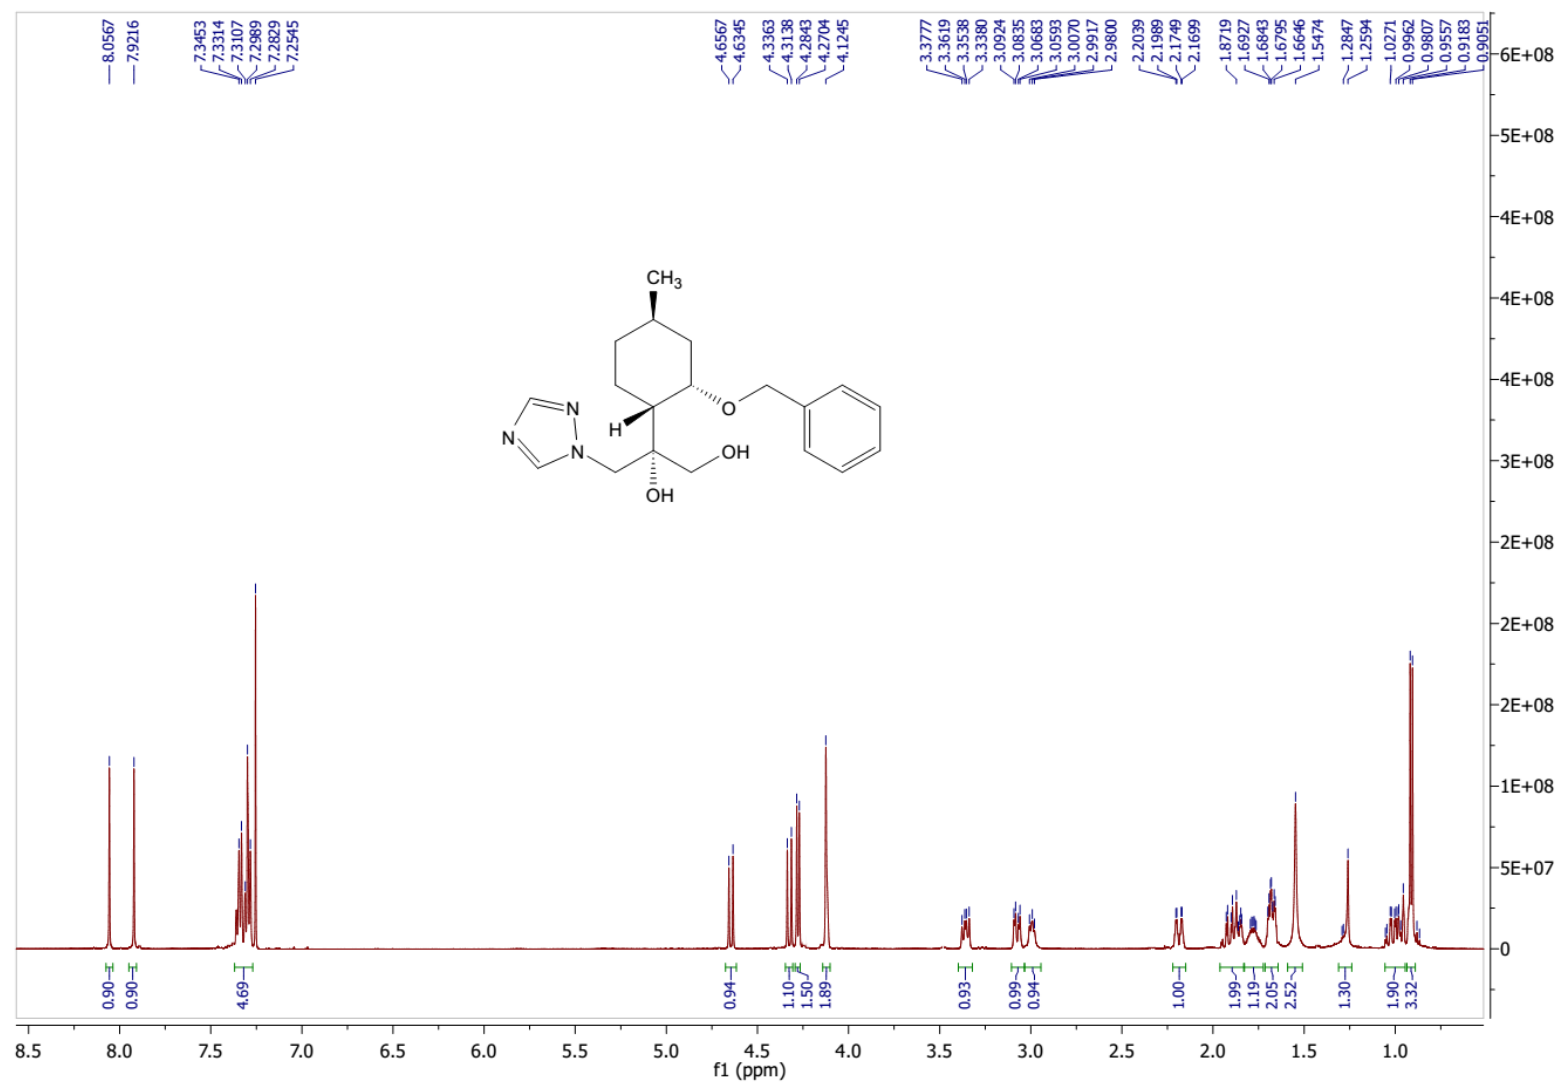

Figure S 39:  $^{13}\text{C}$ -NMR of compound **15a**

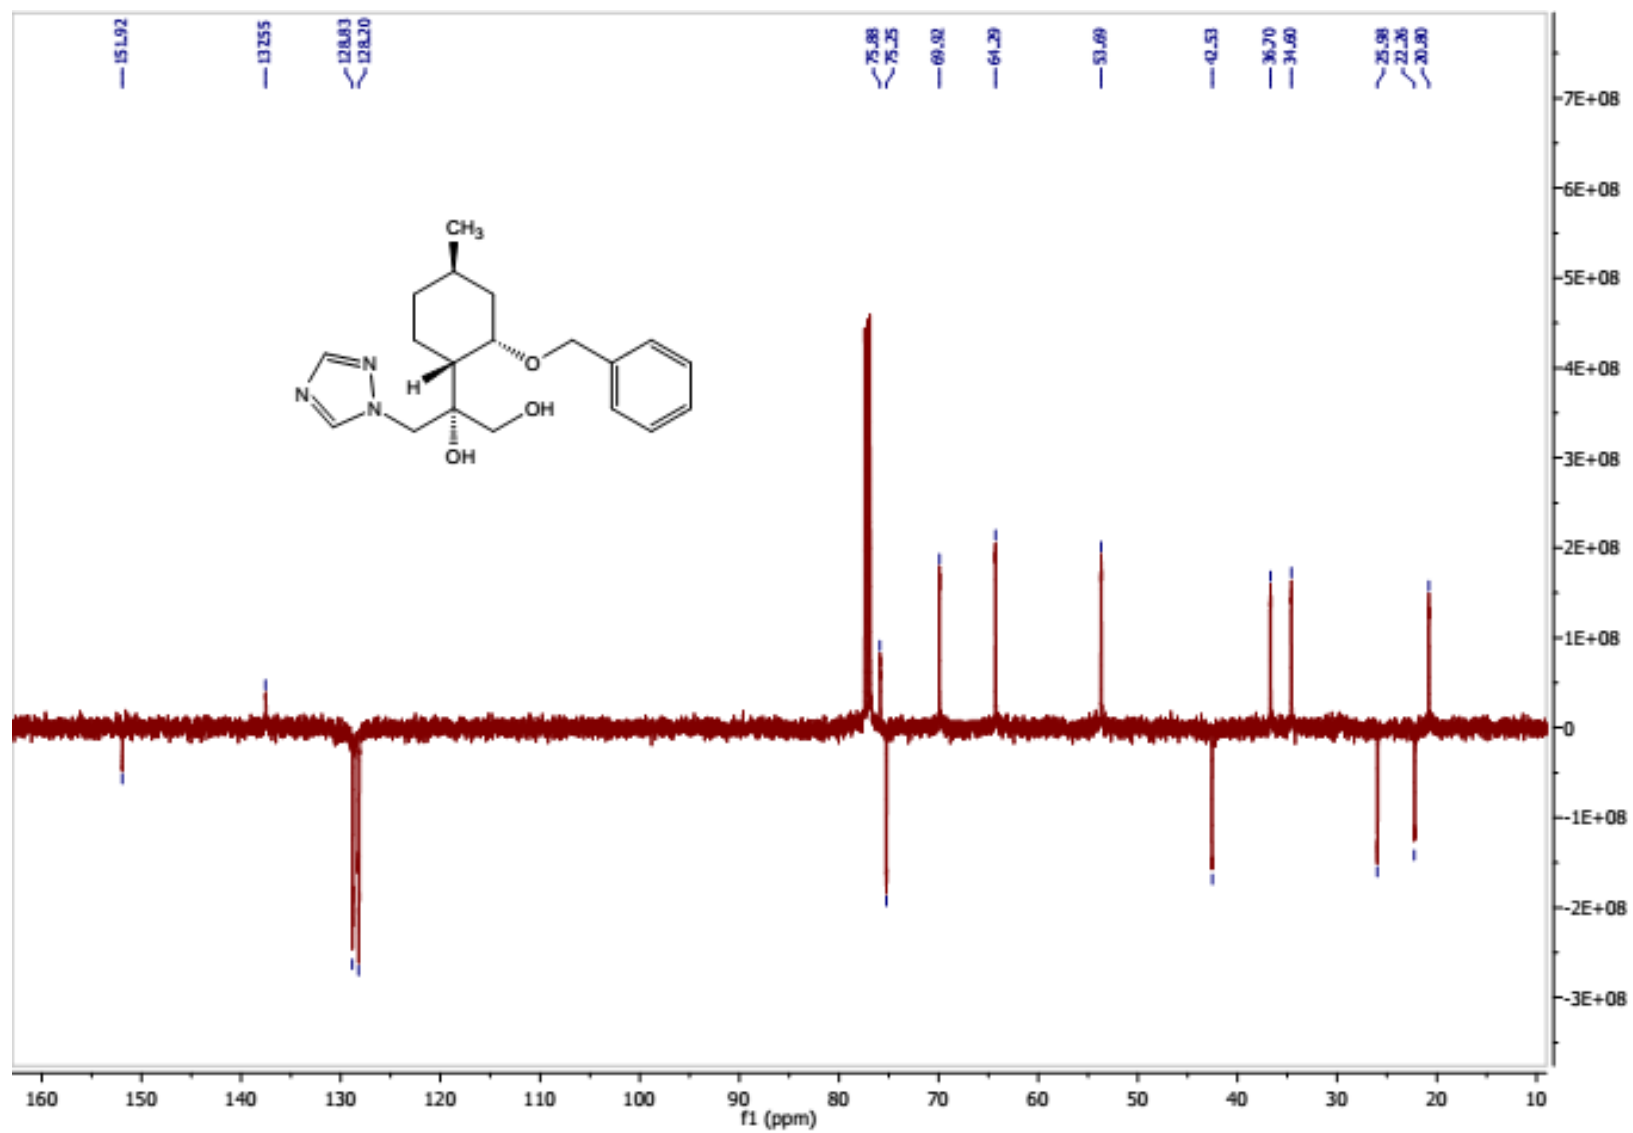

Figure S 40:  $^1\text{H}$ -NMR of compound 16a

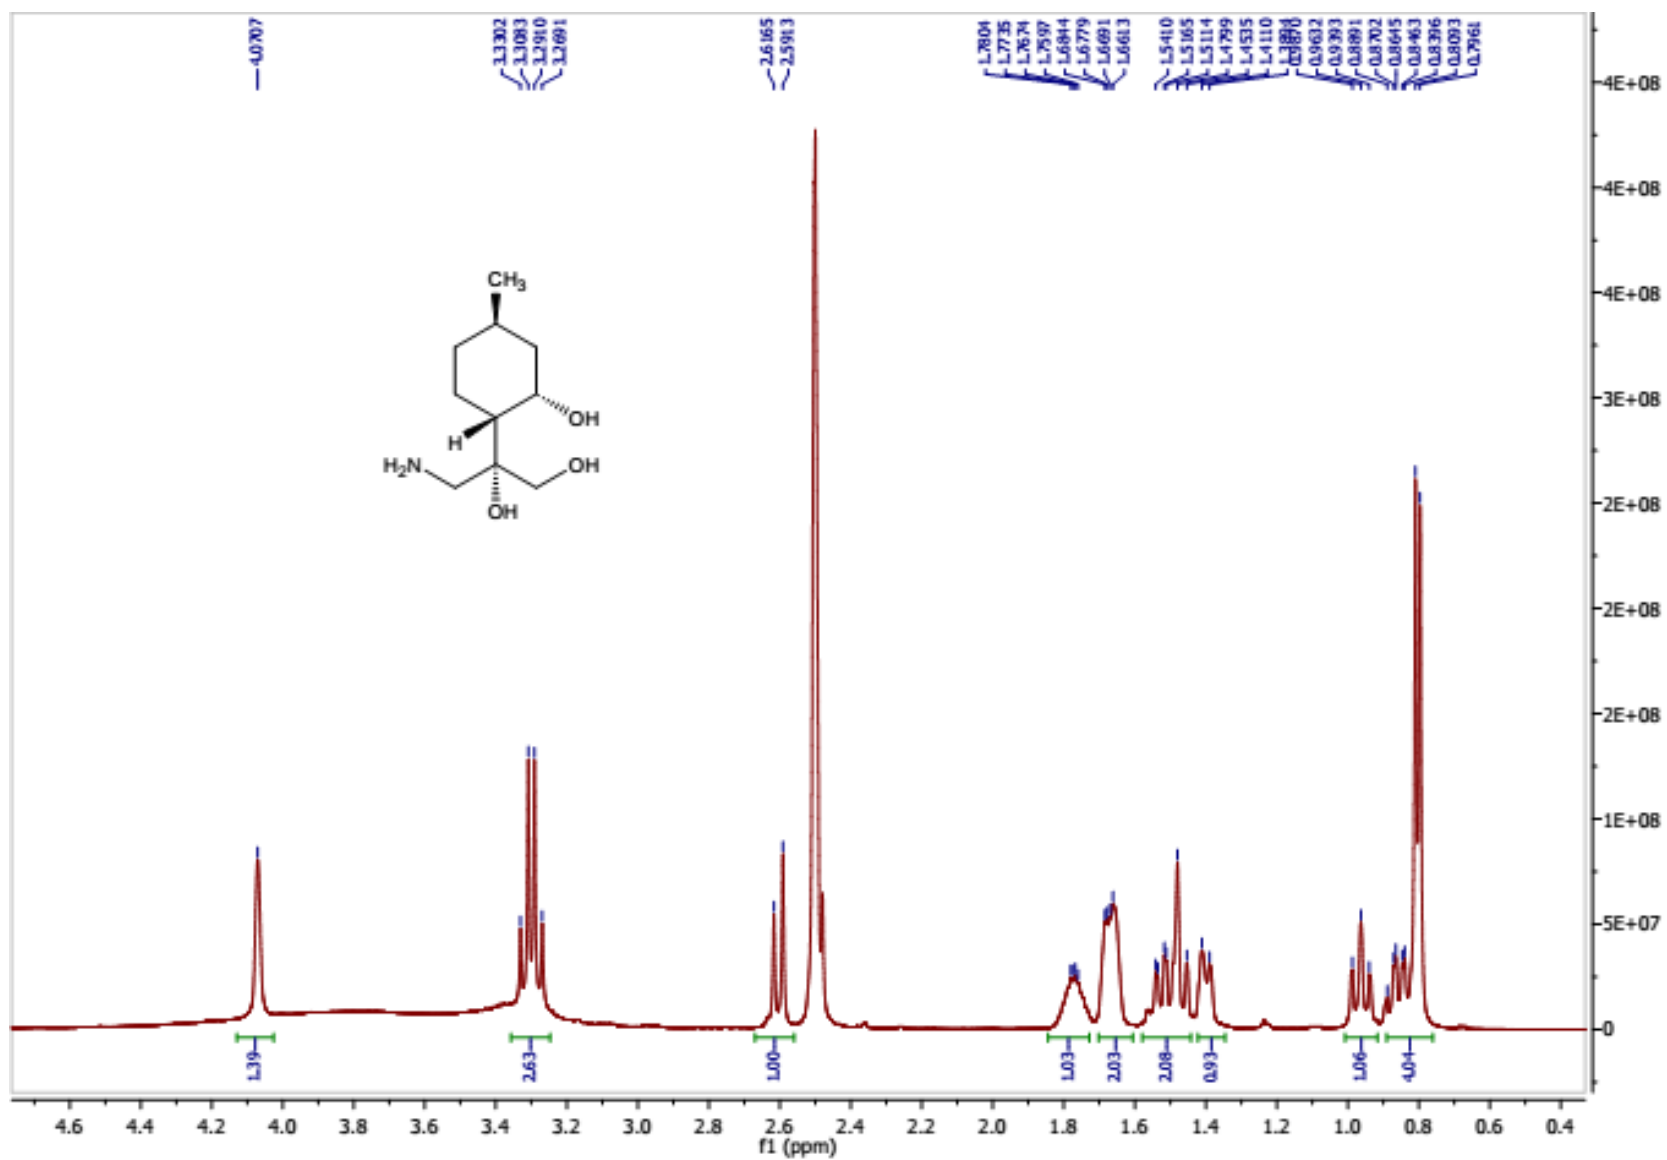

Figure S 41:  $^{13}\text{C}$ -NMR of compound **16a**

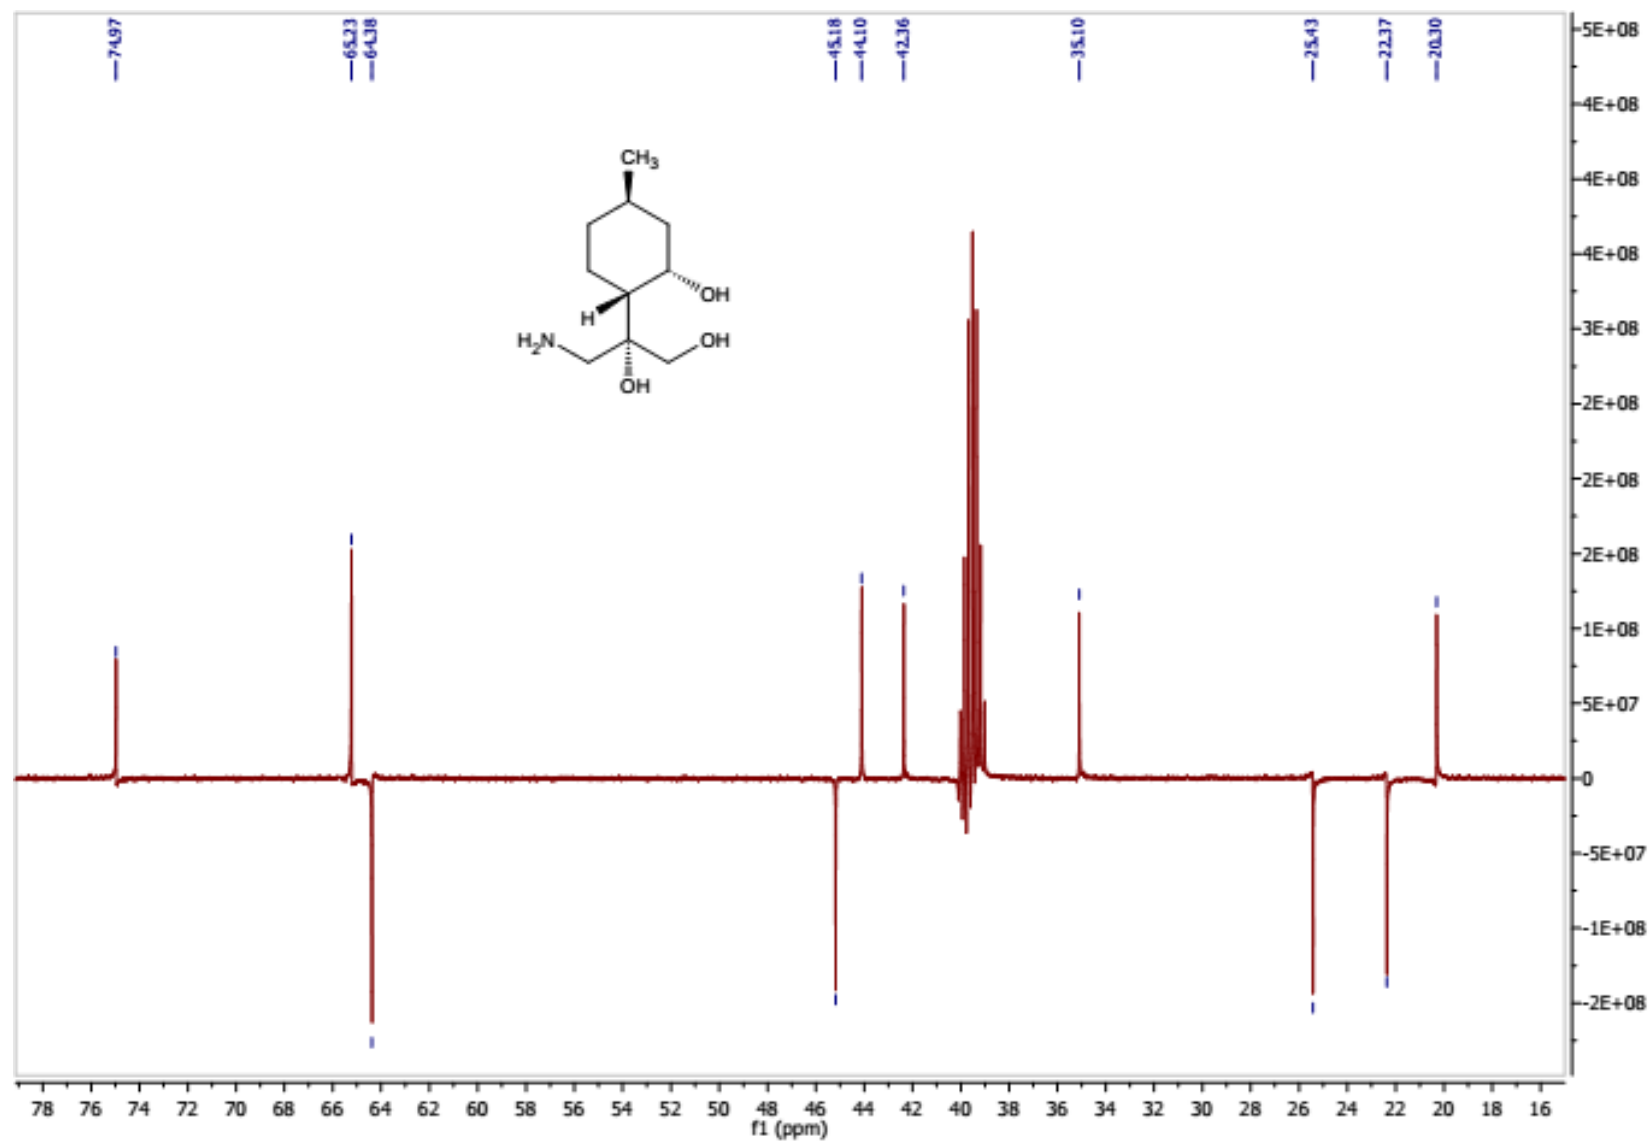



Figure S 42:  $^1\text{H}$ -NMR of compound **16b**

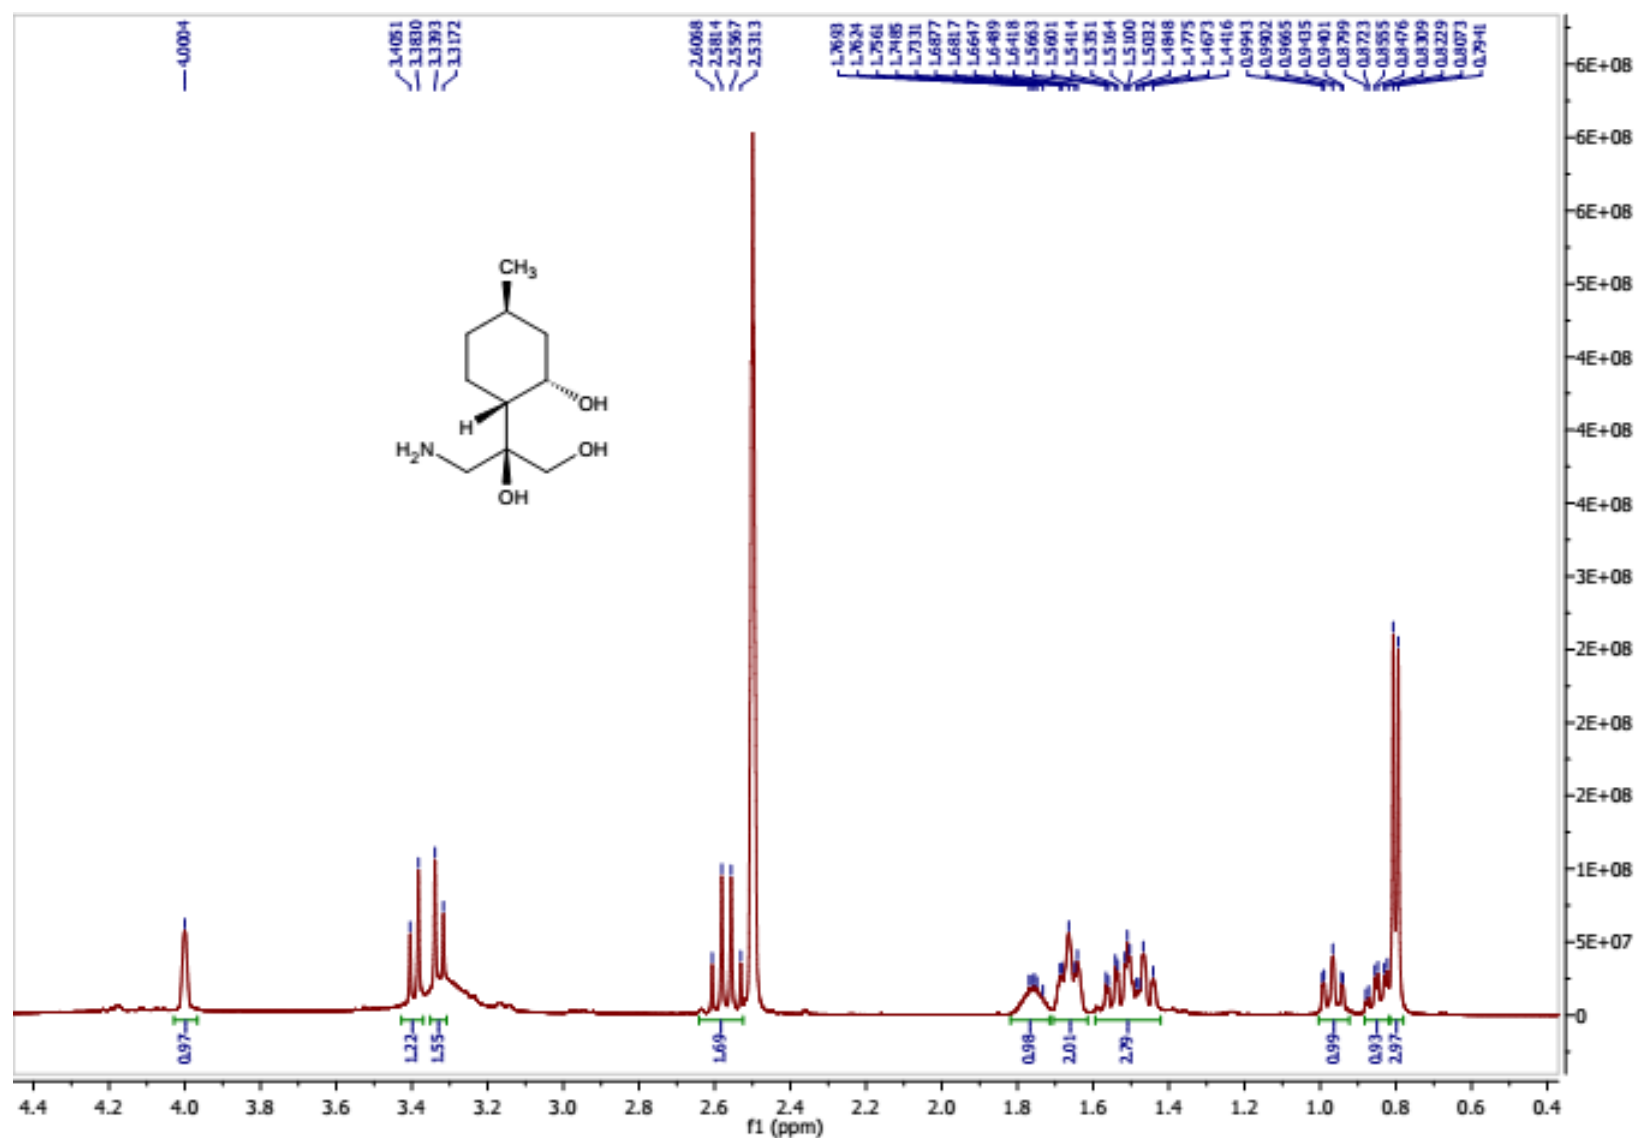

Figure S 43:  $^{13}\text{C}$ -NMR of compound **16b**

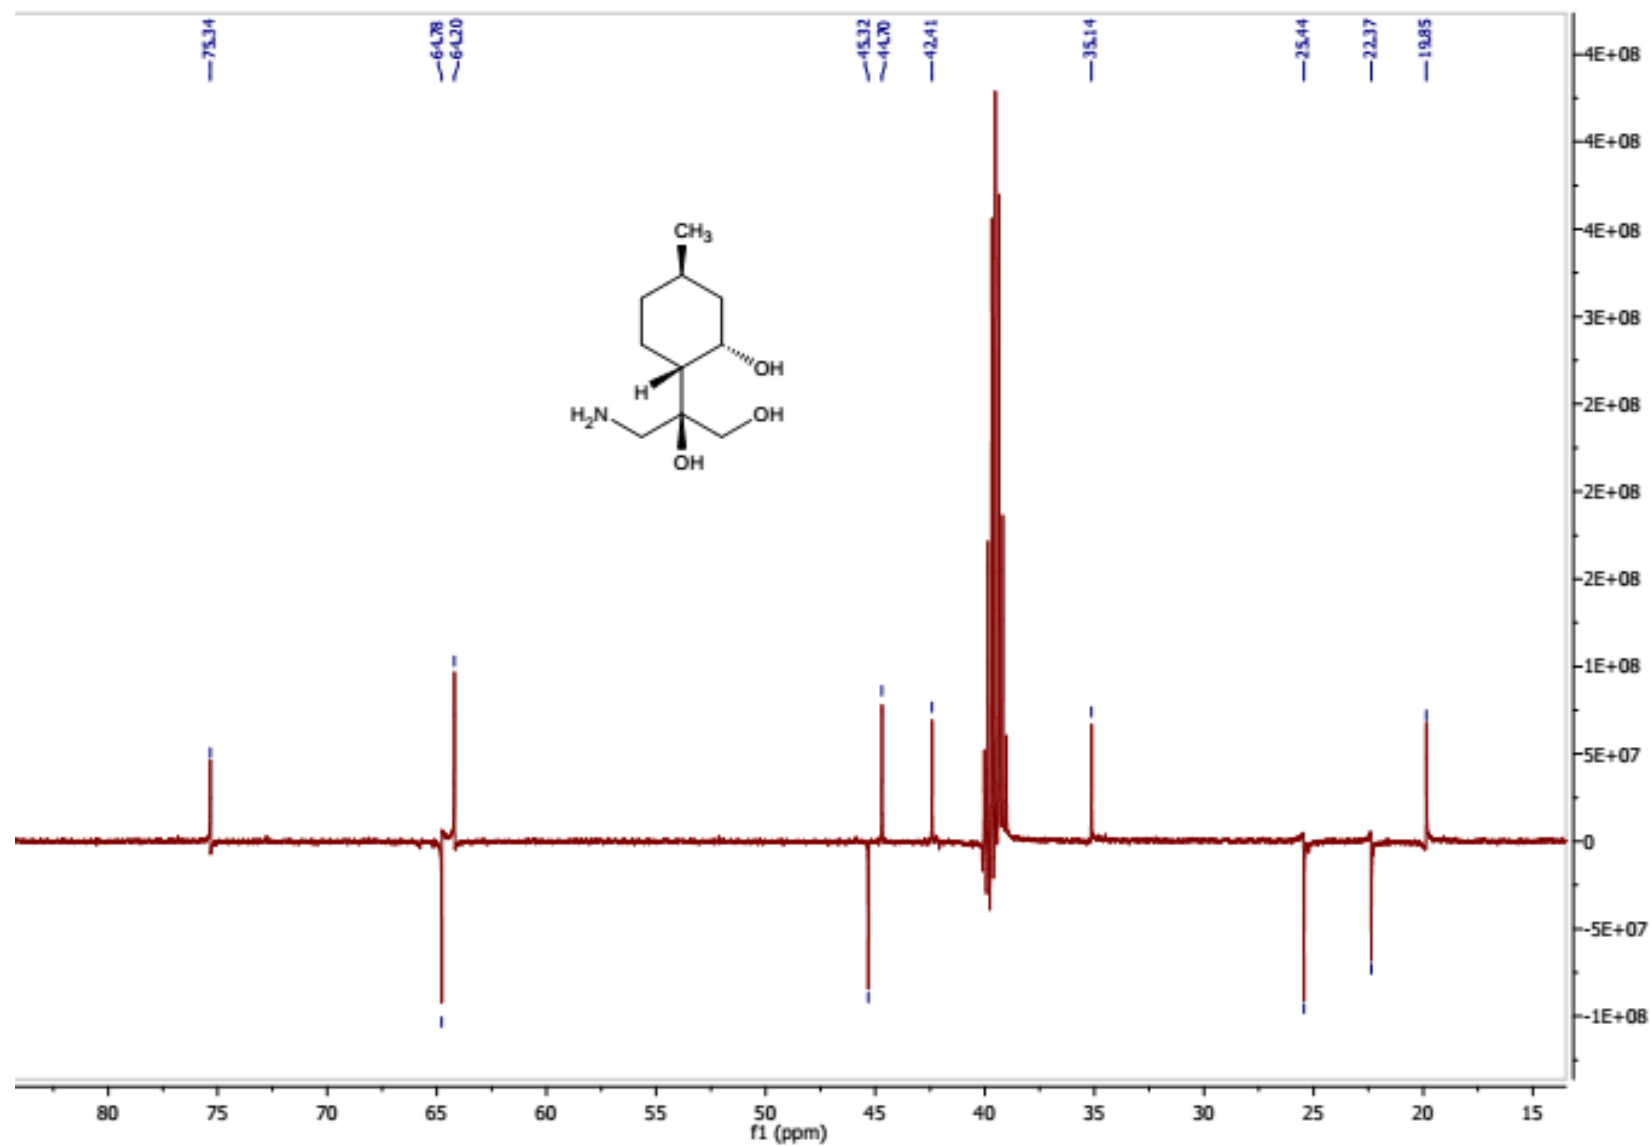

Figure S 44:  $^1\text{H}$ -NMR of compound **18a**

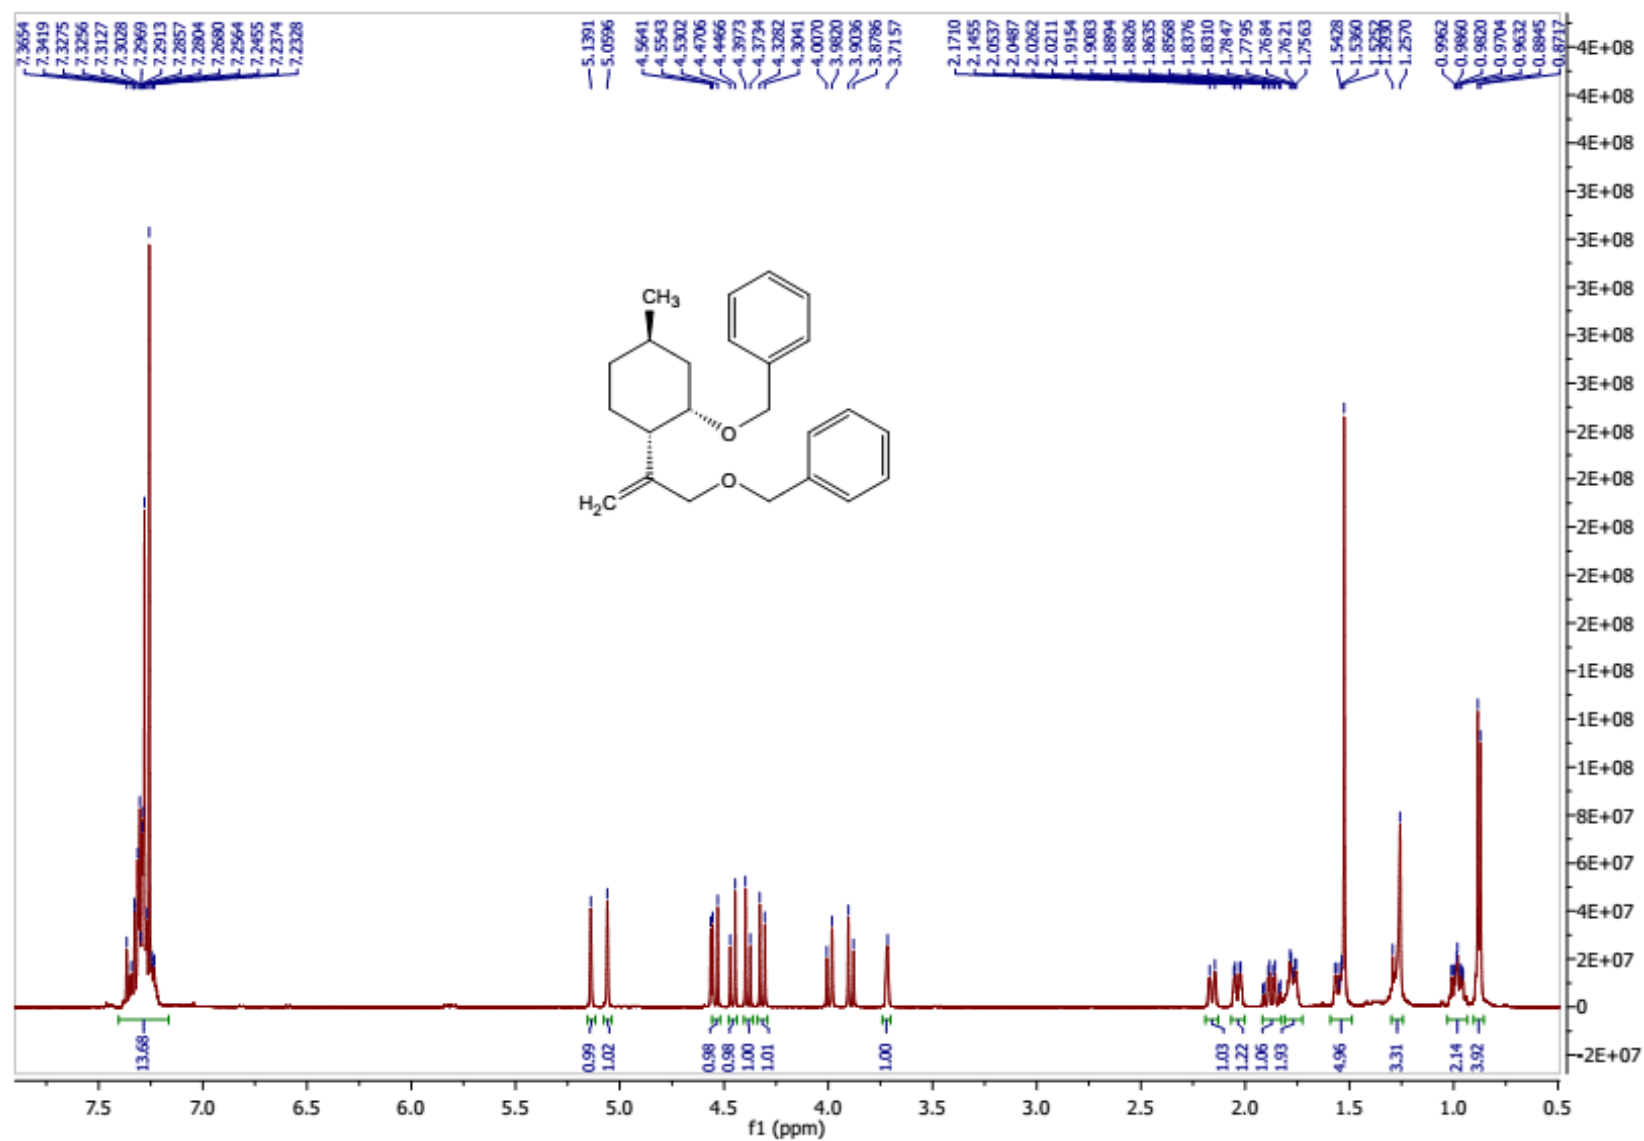

Figure S 45:  $^{13}\text{C}$ -NMR of compound **18a**

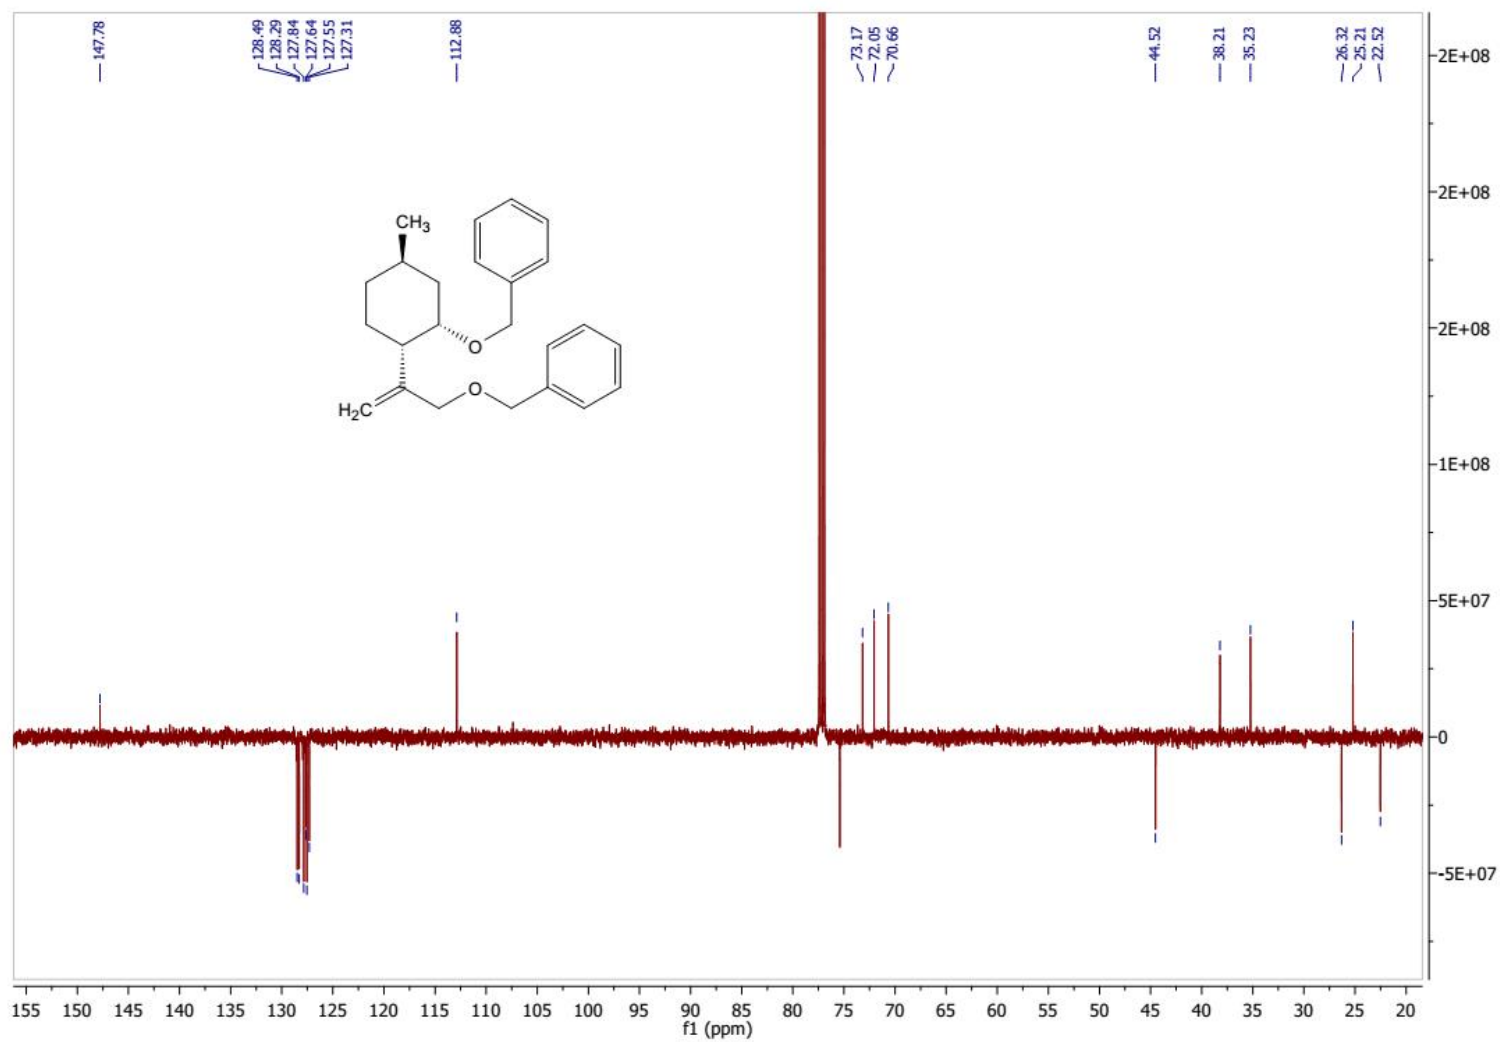

Figure S 46:  $^1\text{H}$ -NMR of compound **19a**

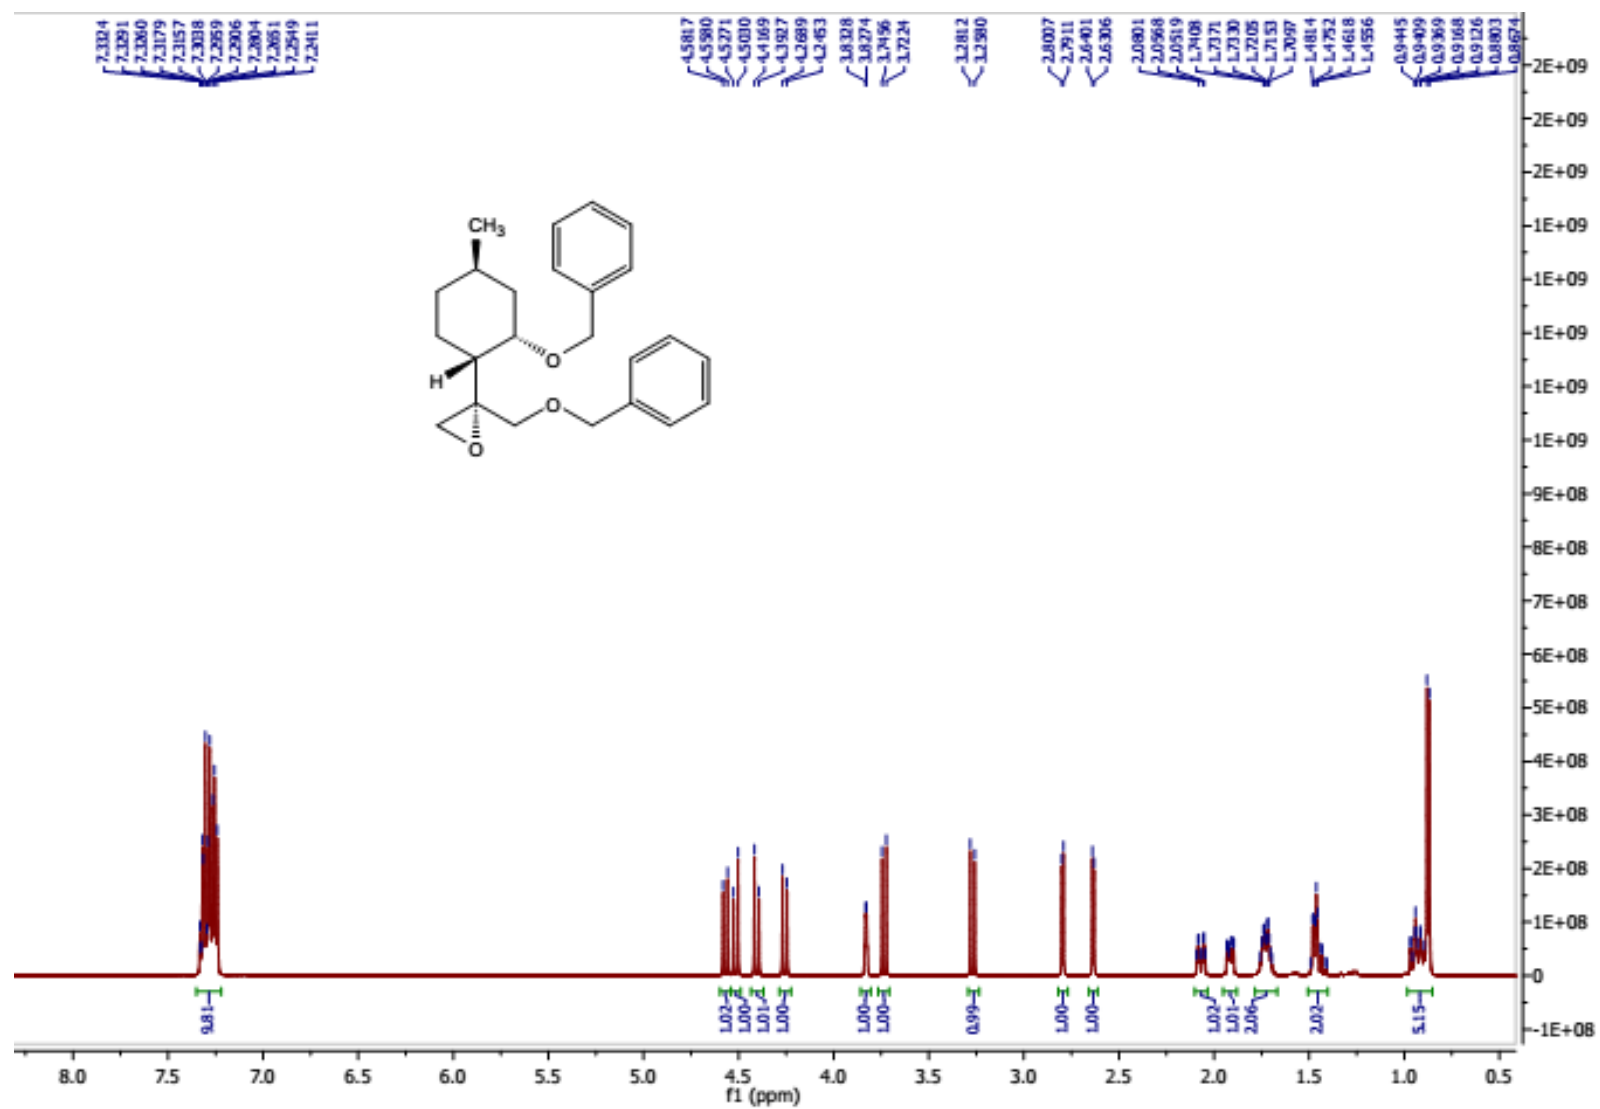

Figure S 47:  $^{13}\text{C}$ -NMR of compound **19**

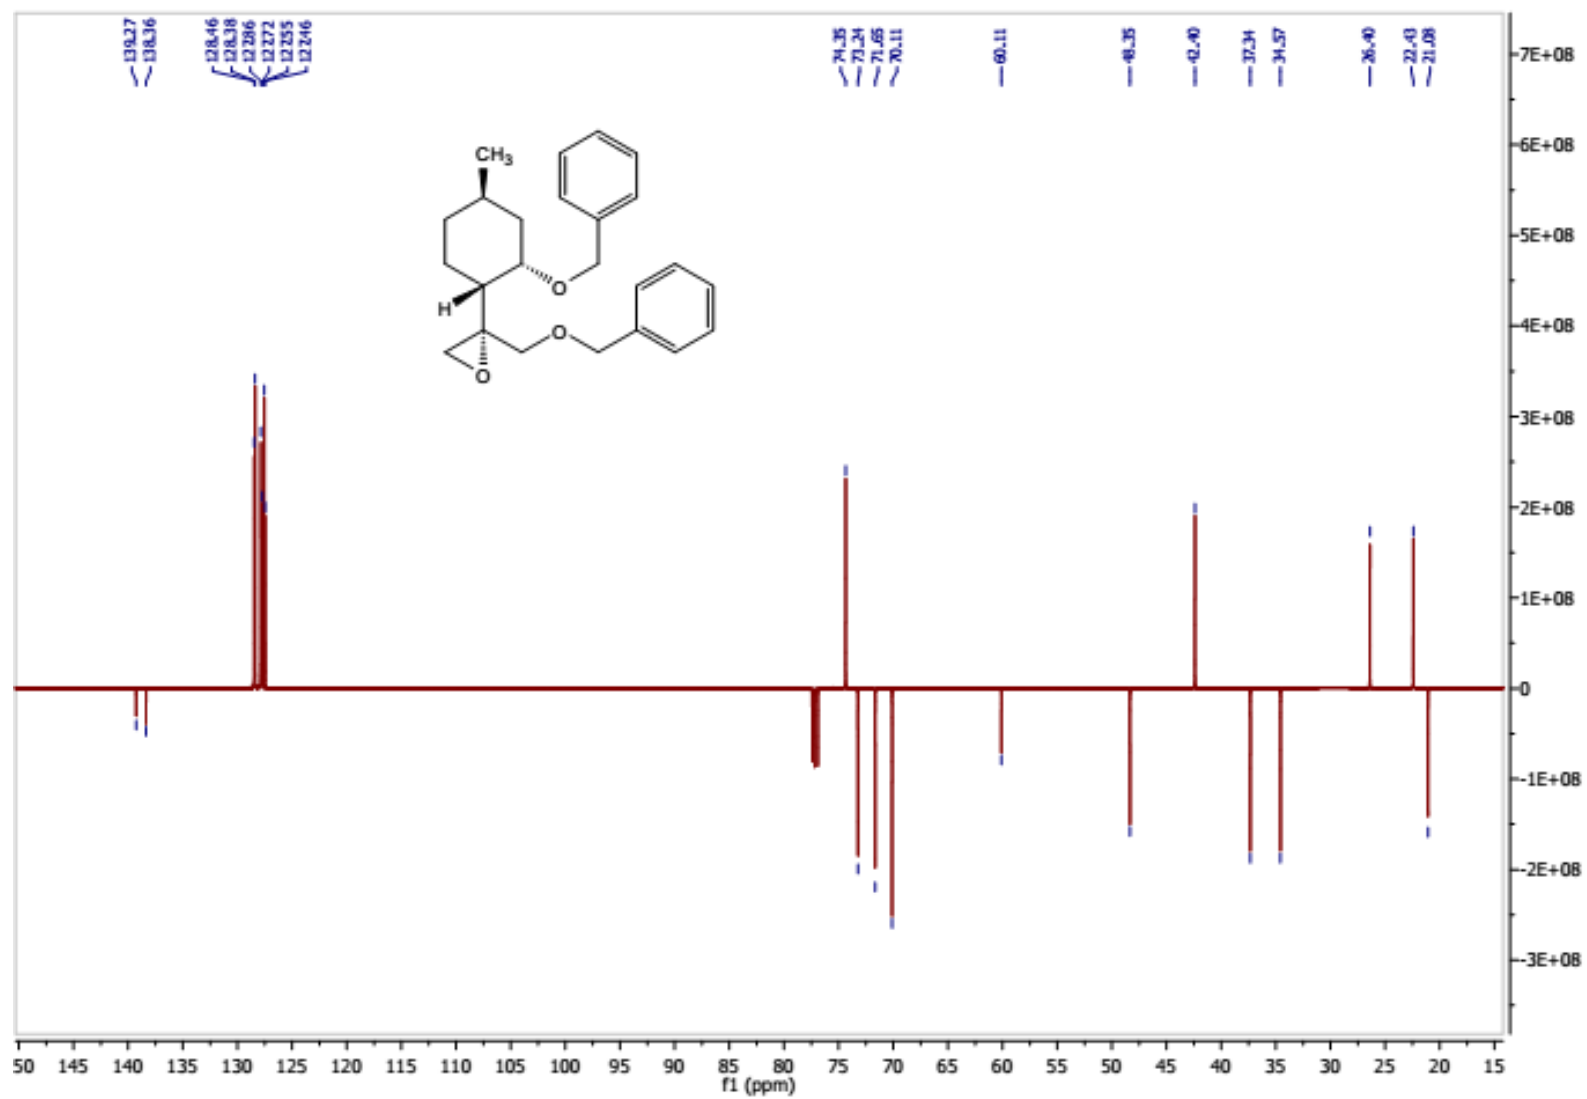

Figure S 48:  $^1\text{H}$ -NMR of compound **19b**

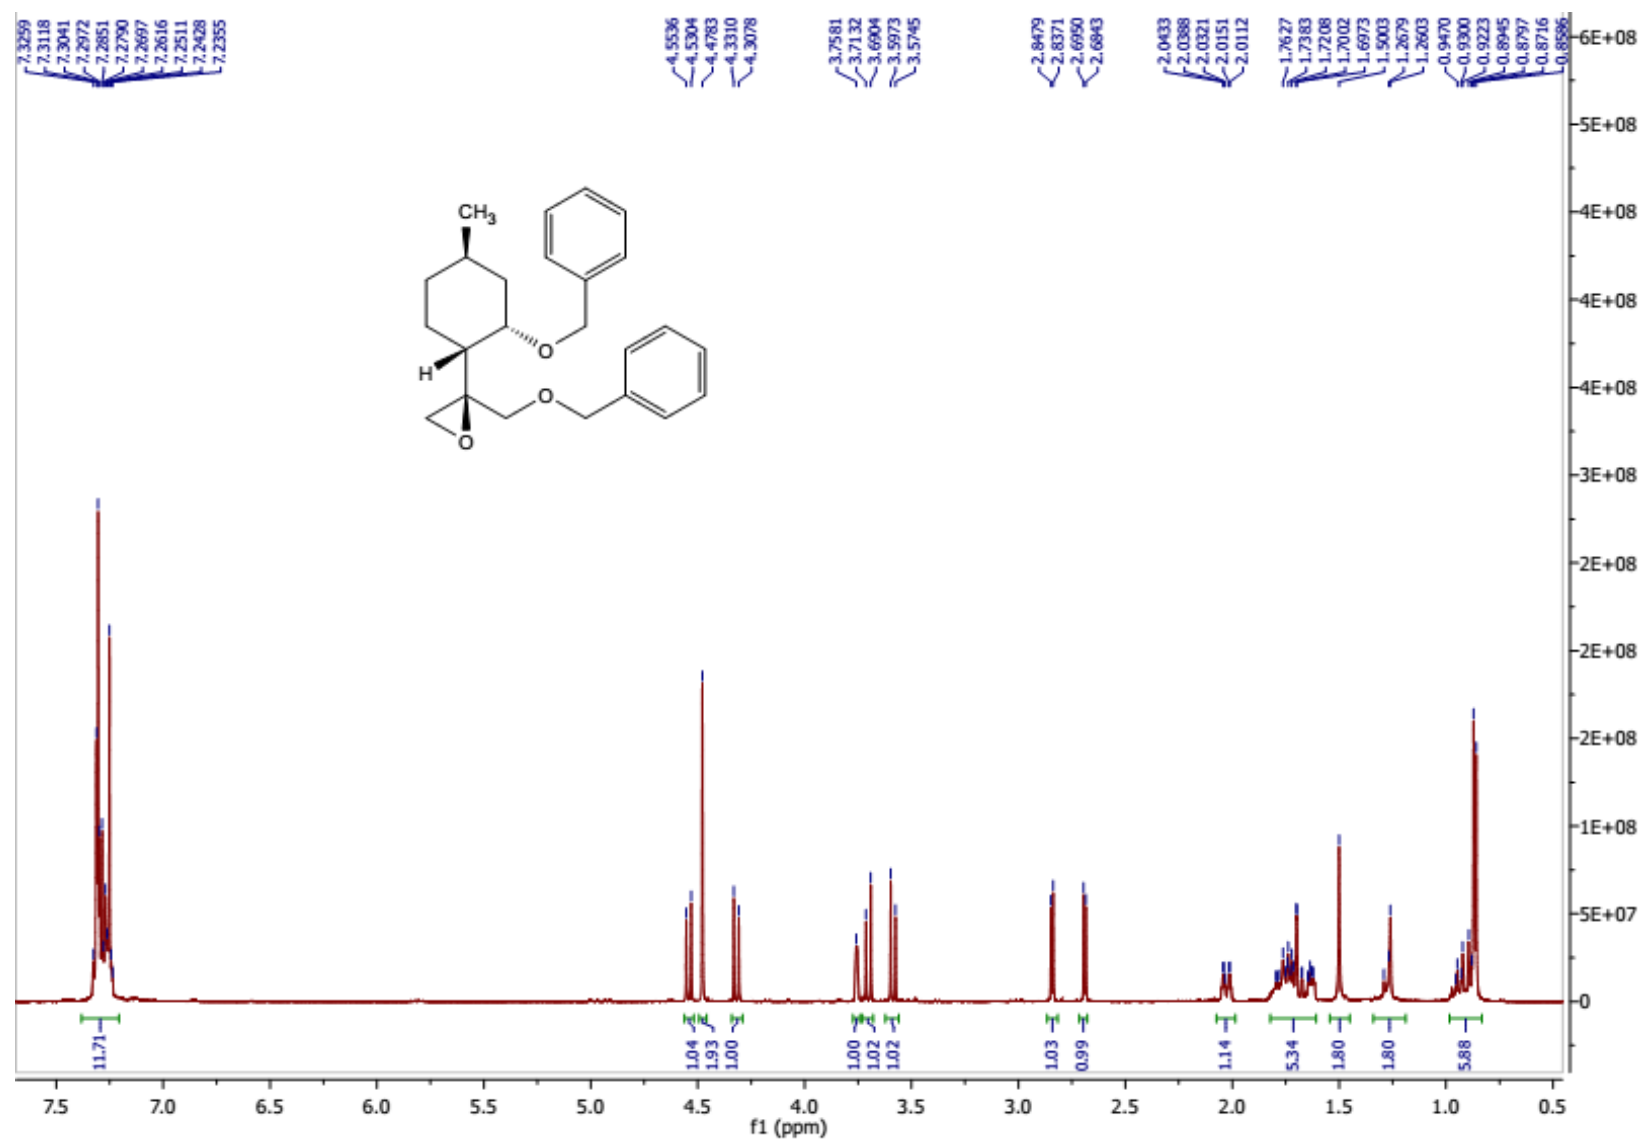

Figure S 49:  $^{13}\text{C}$ -NMR of compound **19b**

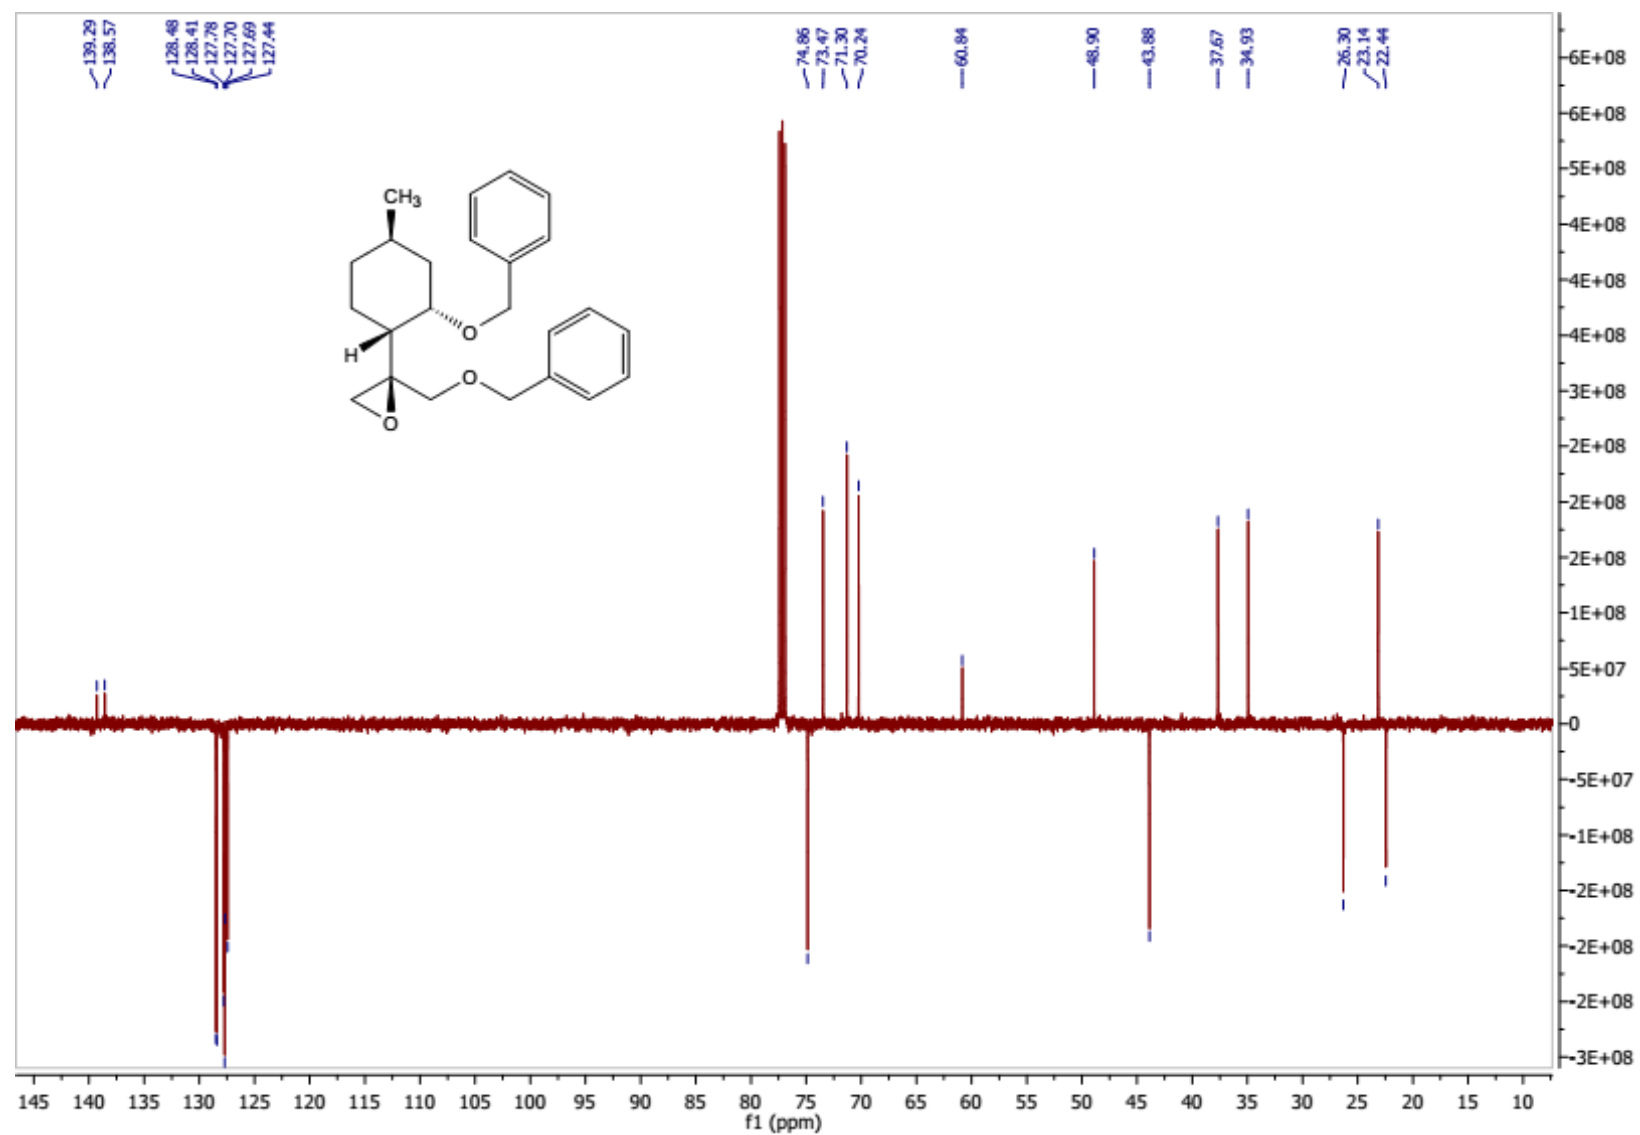



Figure S 50:  $^1\text{H}$ -NMR of compound **20a**

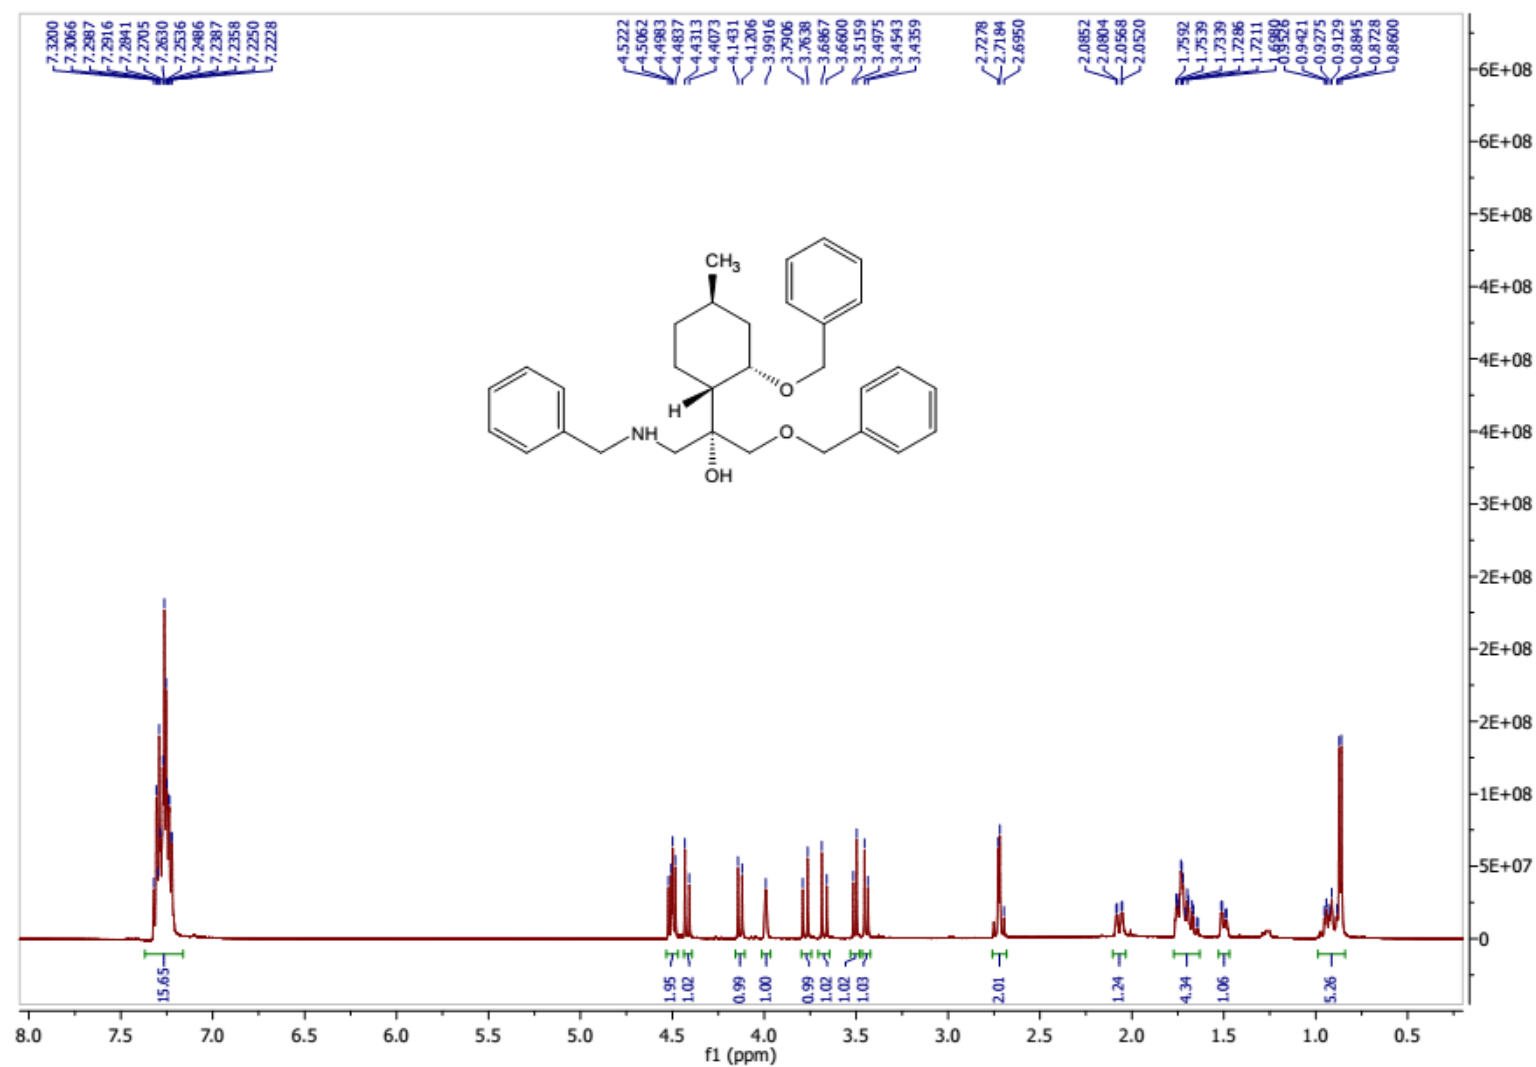

Figure S 51:  $^{13}\text{C}$ -NMR of compound **20a**

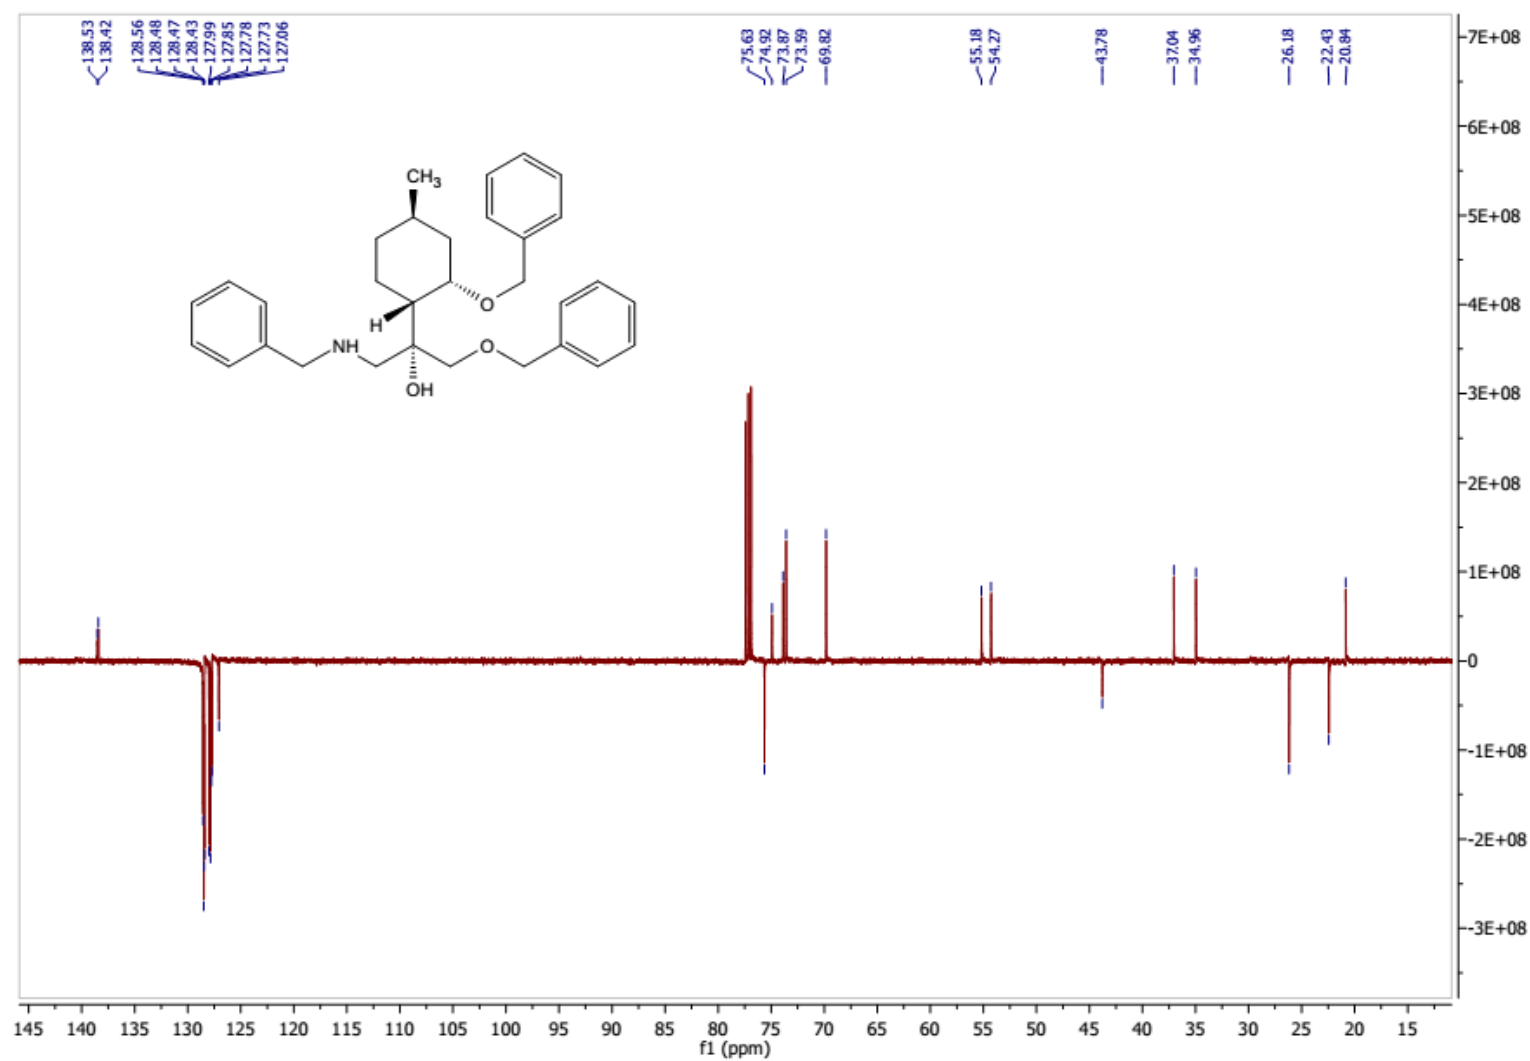

Figure S 52:  $^1\text{H}$ -NMR of compound **20b**

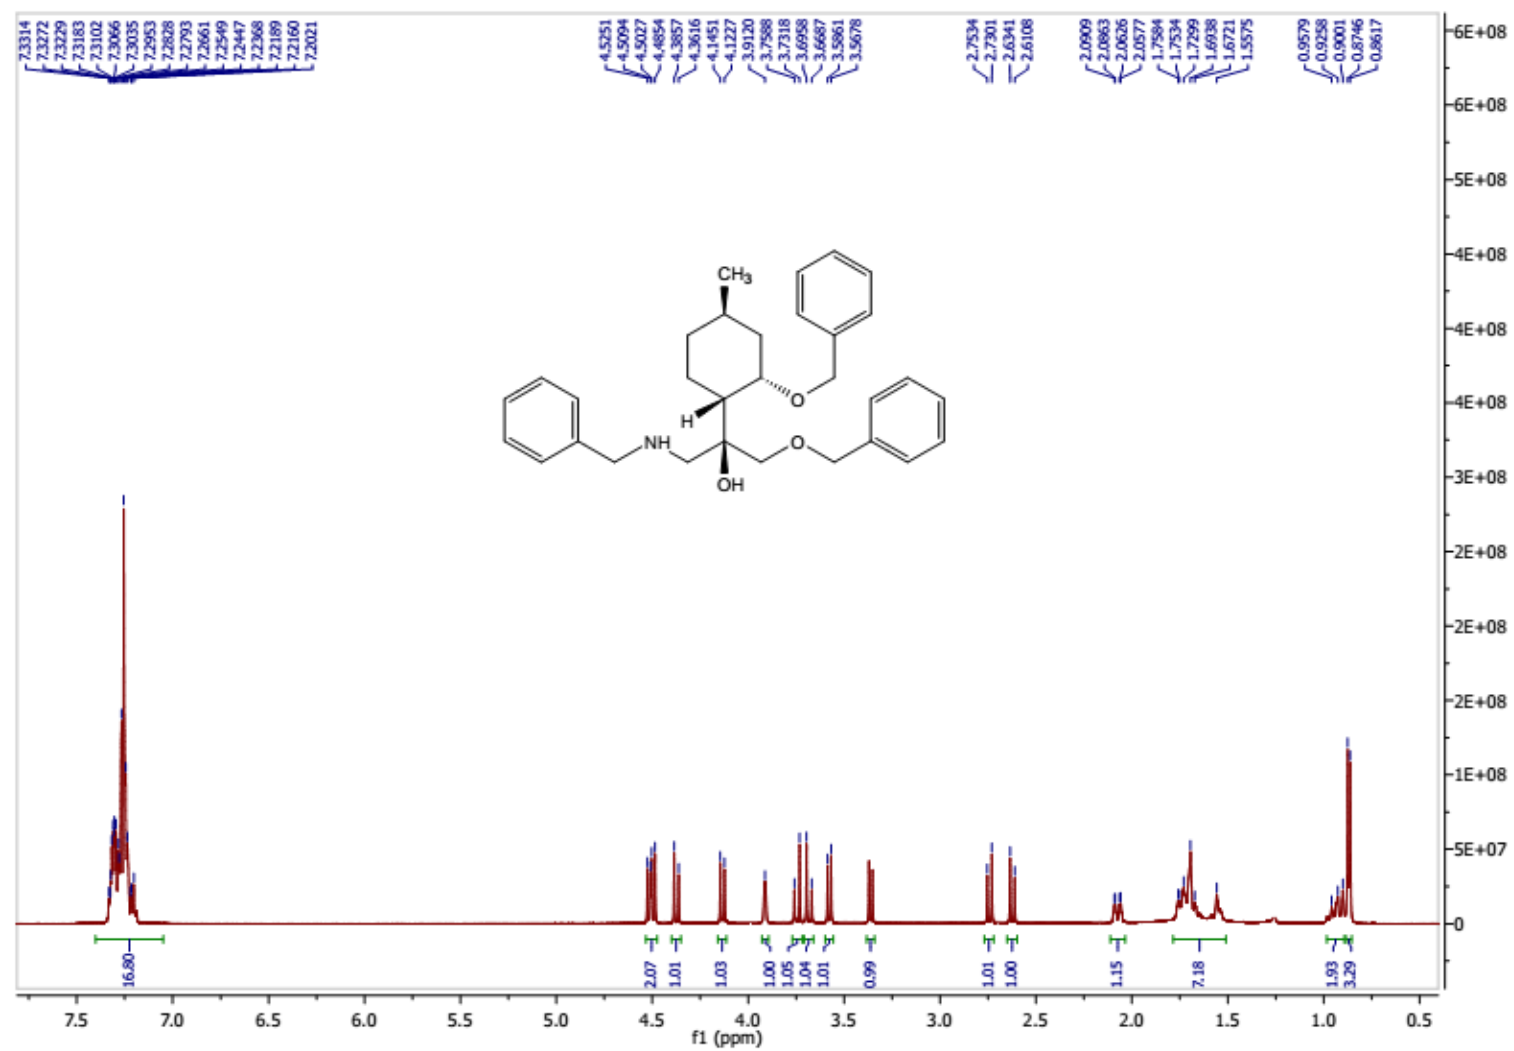

Figure S 53:  $^{13}\text{C}$ -NMR of compound **20b**

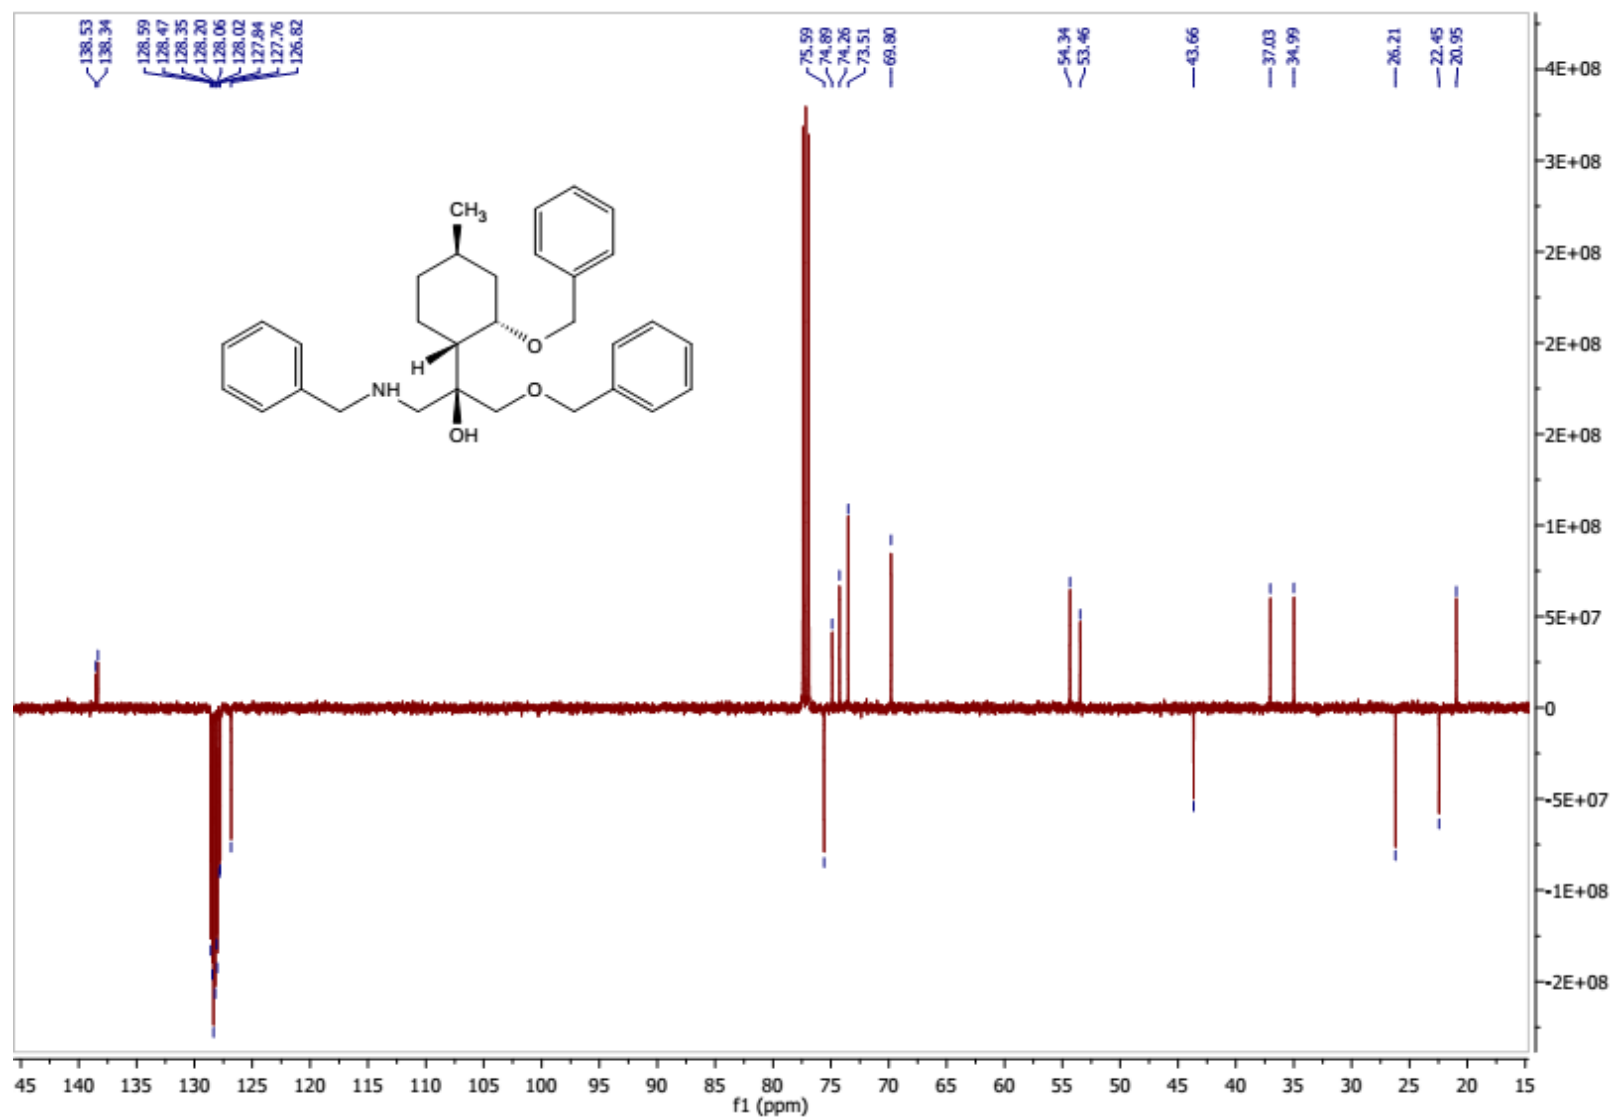

Figure S 54:  $^1\text{H}$ -NMR of compound **21a**

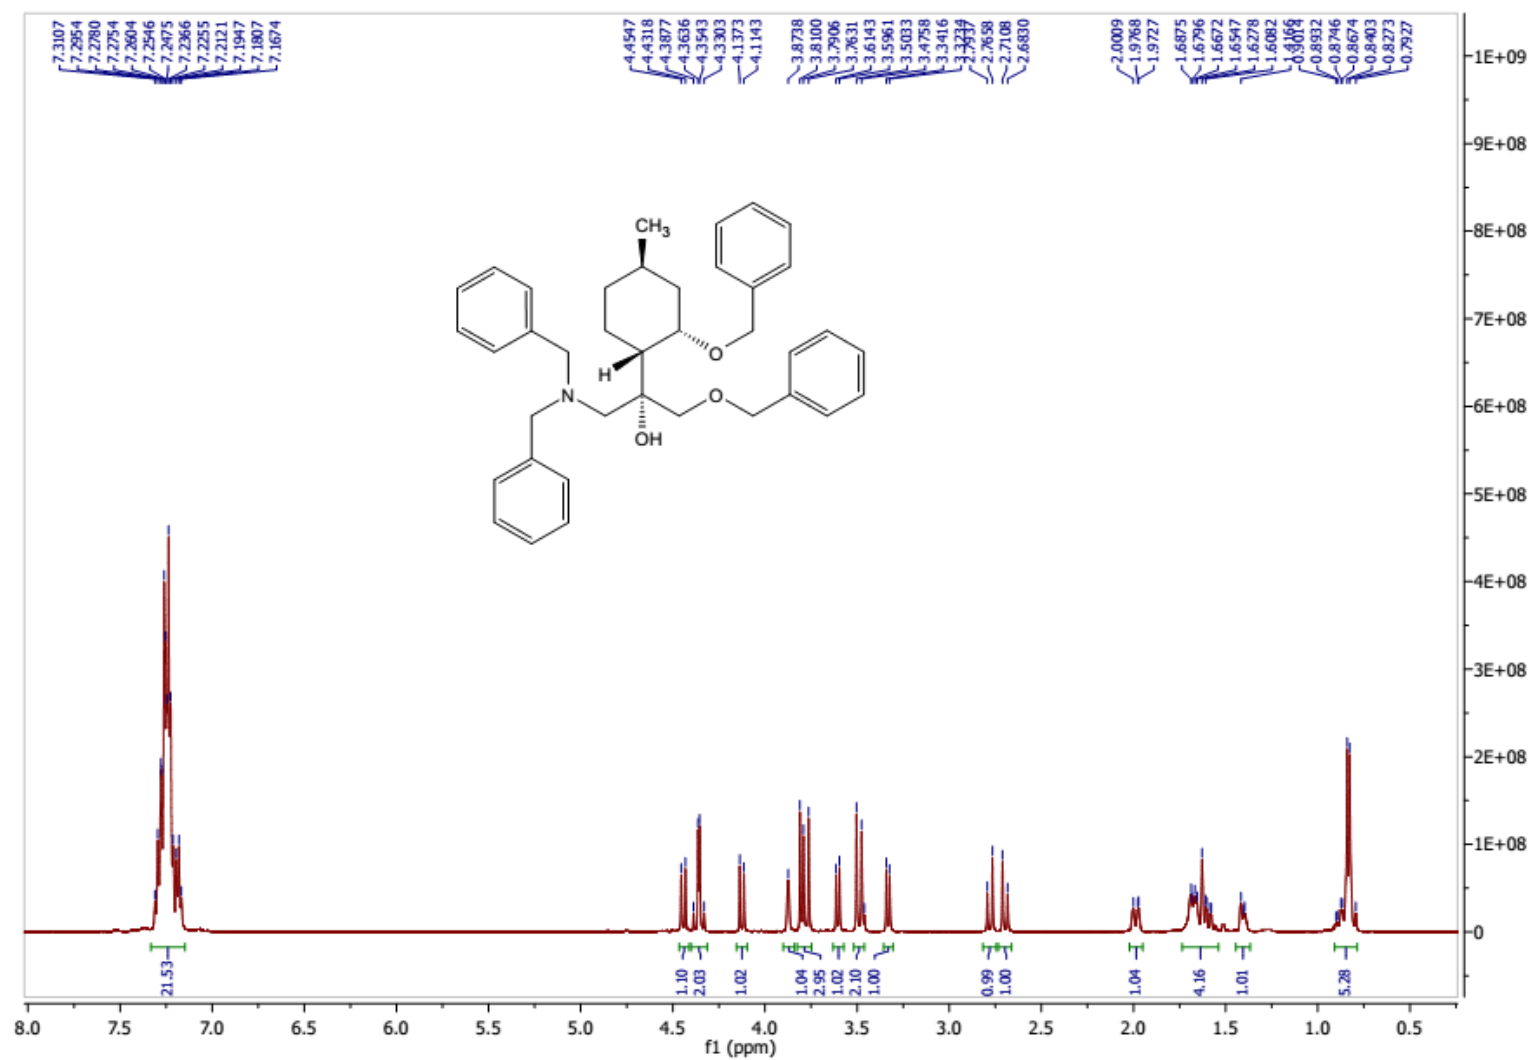

Figure S 55:  $^{13}\text{C}$ -NMR of compound **21a**

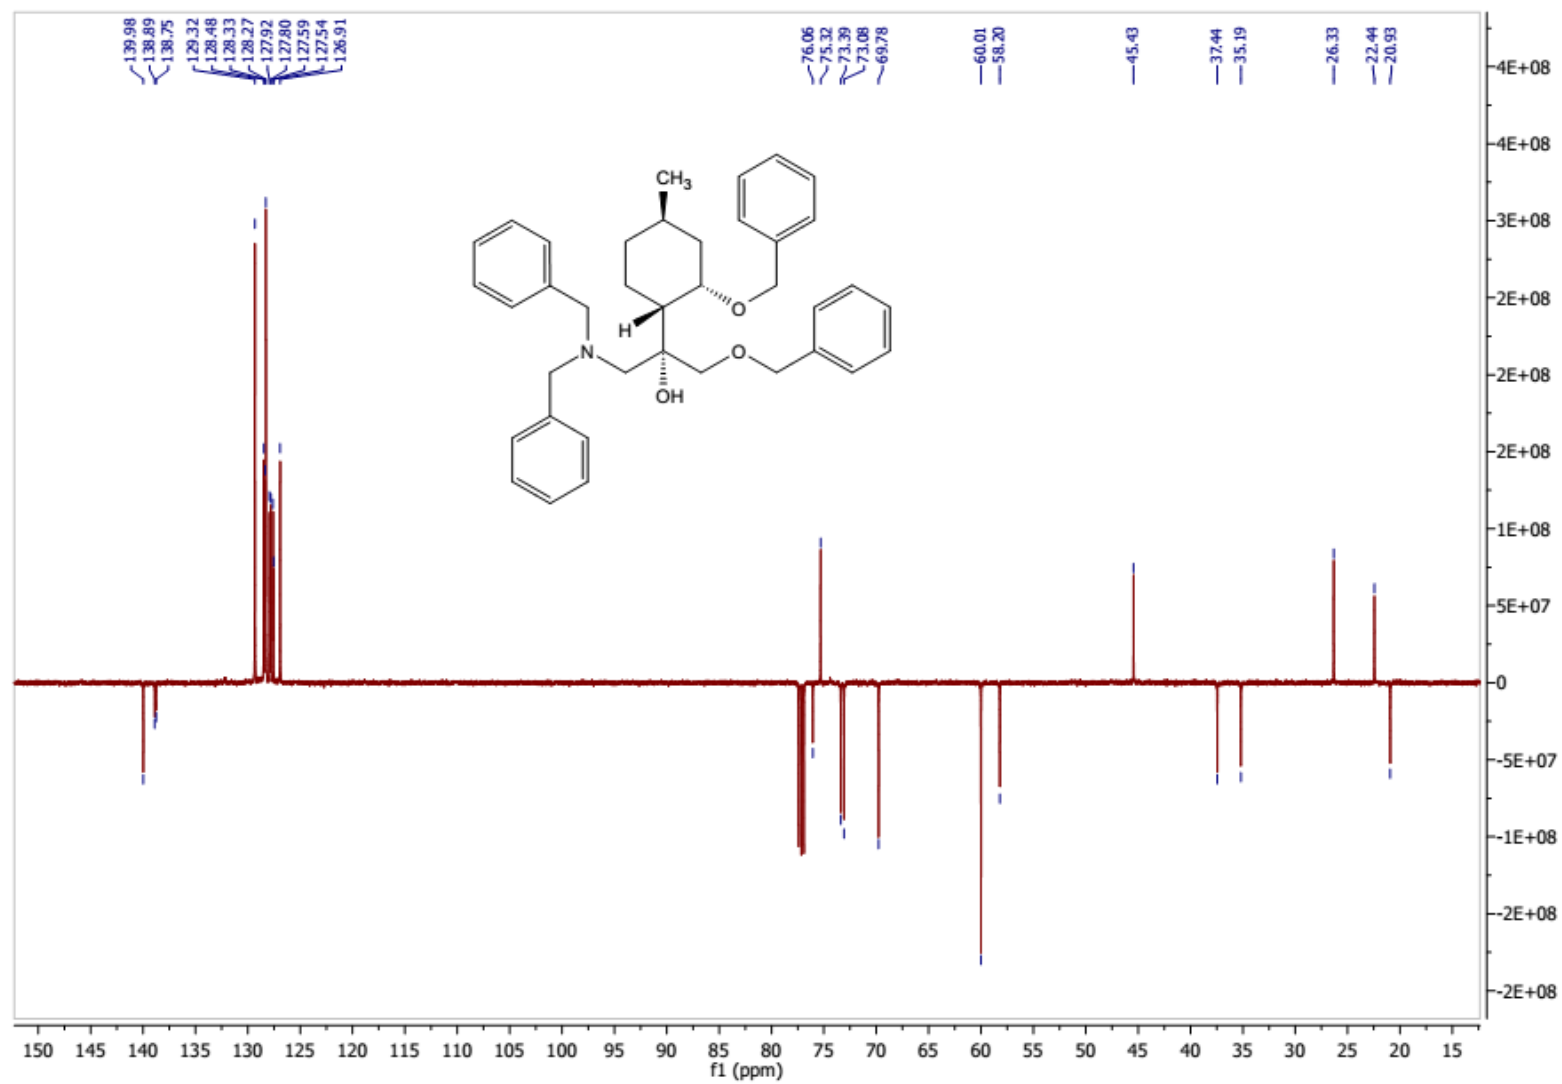

Figure S 56:  $^1\text{H}$ -NMR of compound **21b**

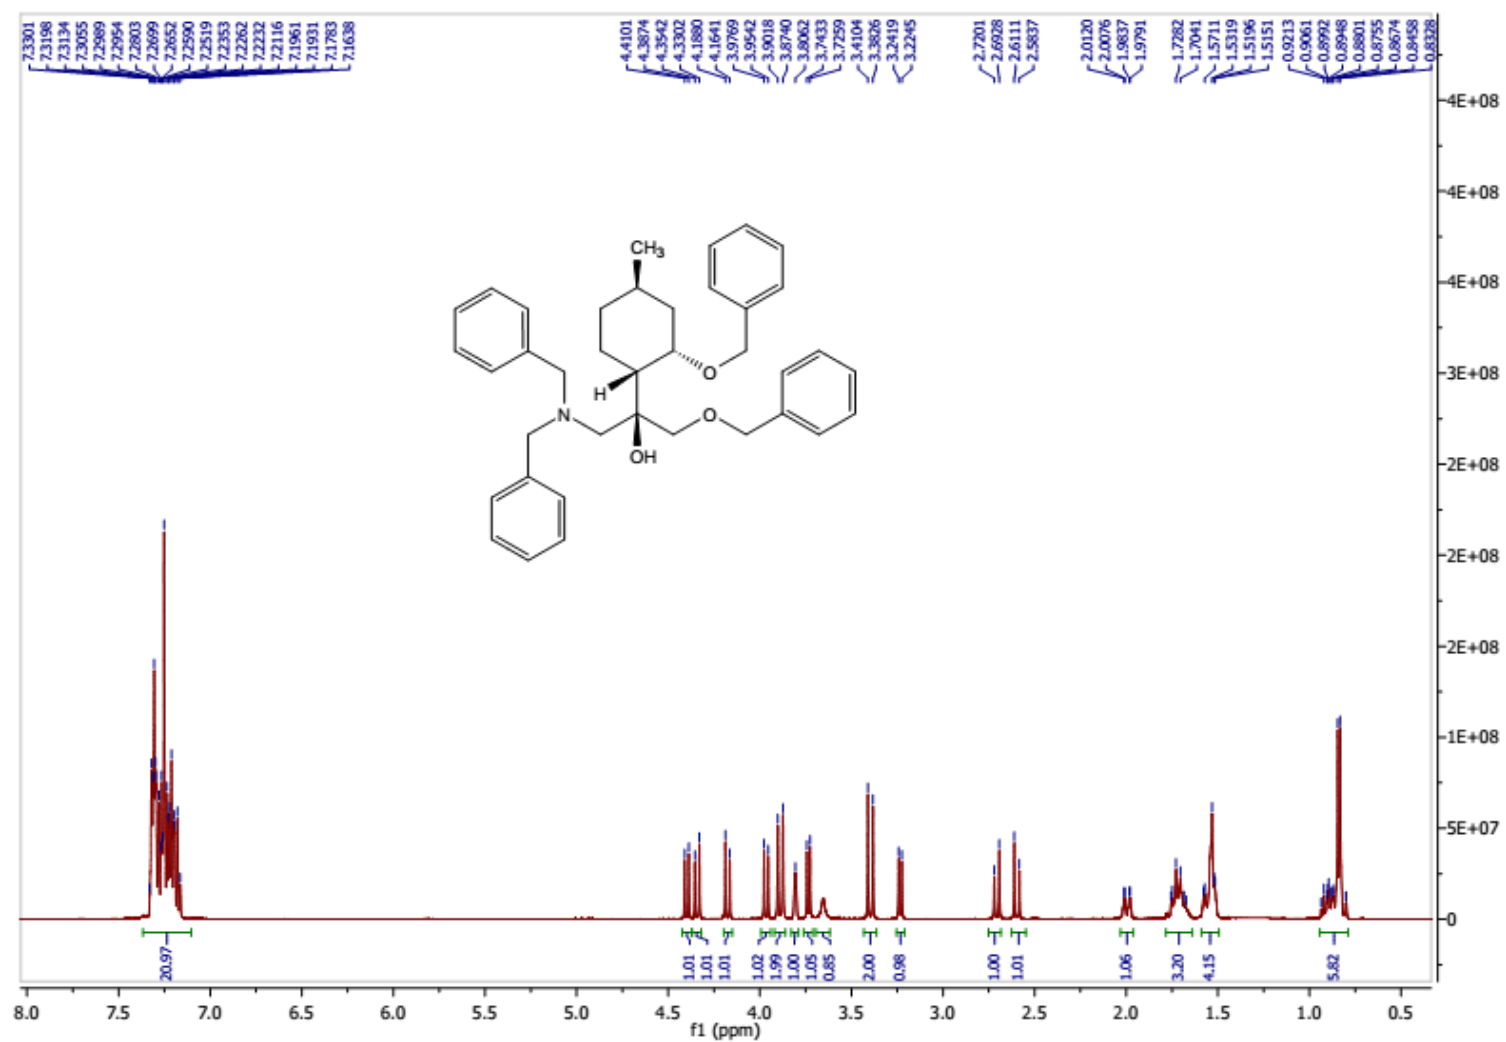

Figure S 57:  $^{13}\text{C}$ -NMR of compound **21b**

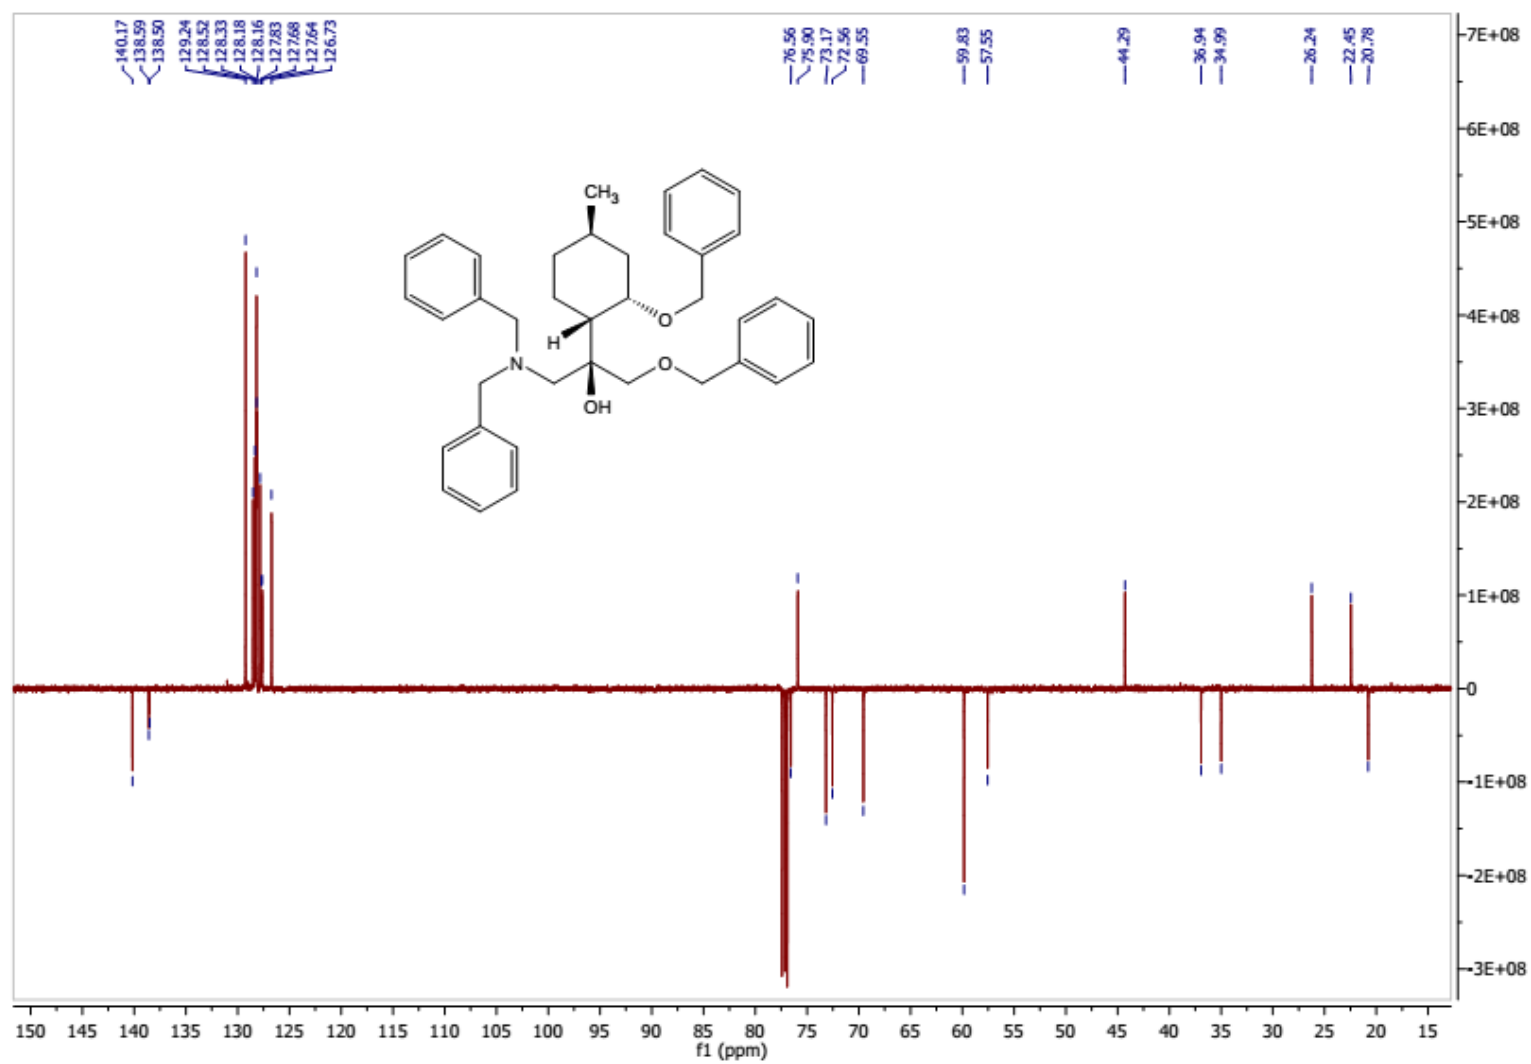



Figure S 58:  $^1\text{H}$ -NMR of compound **22a**

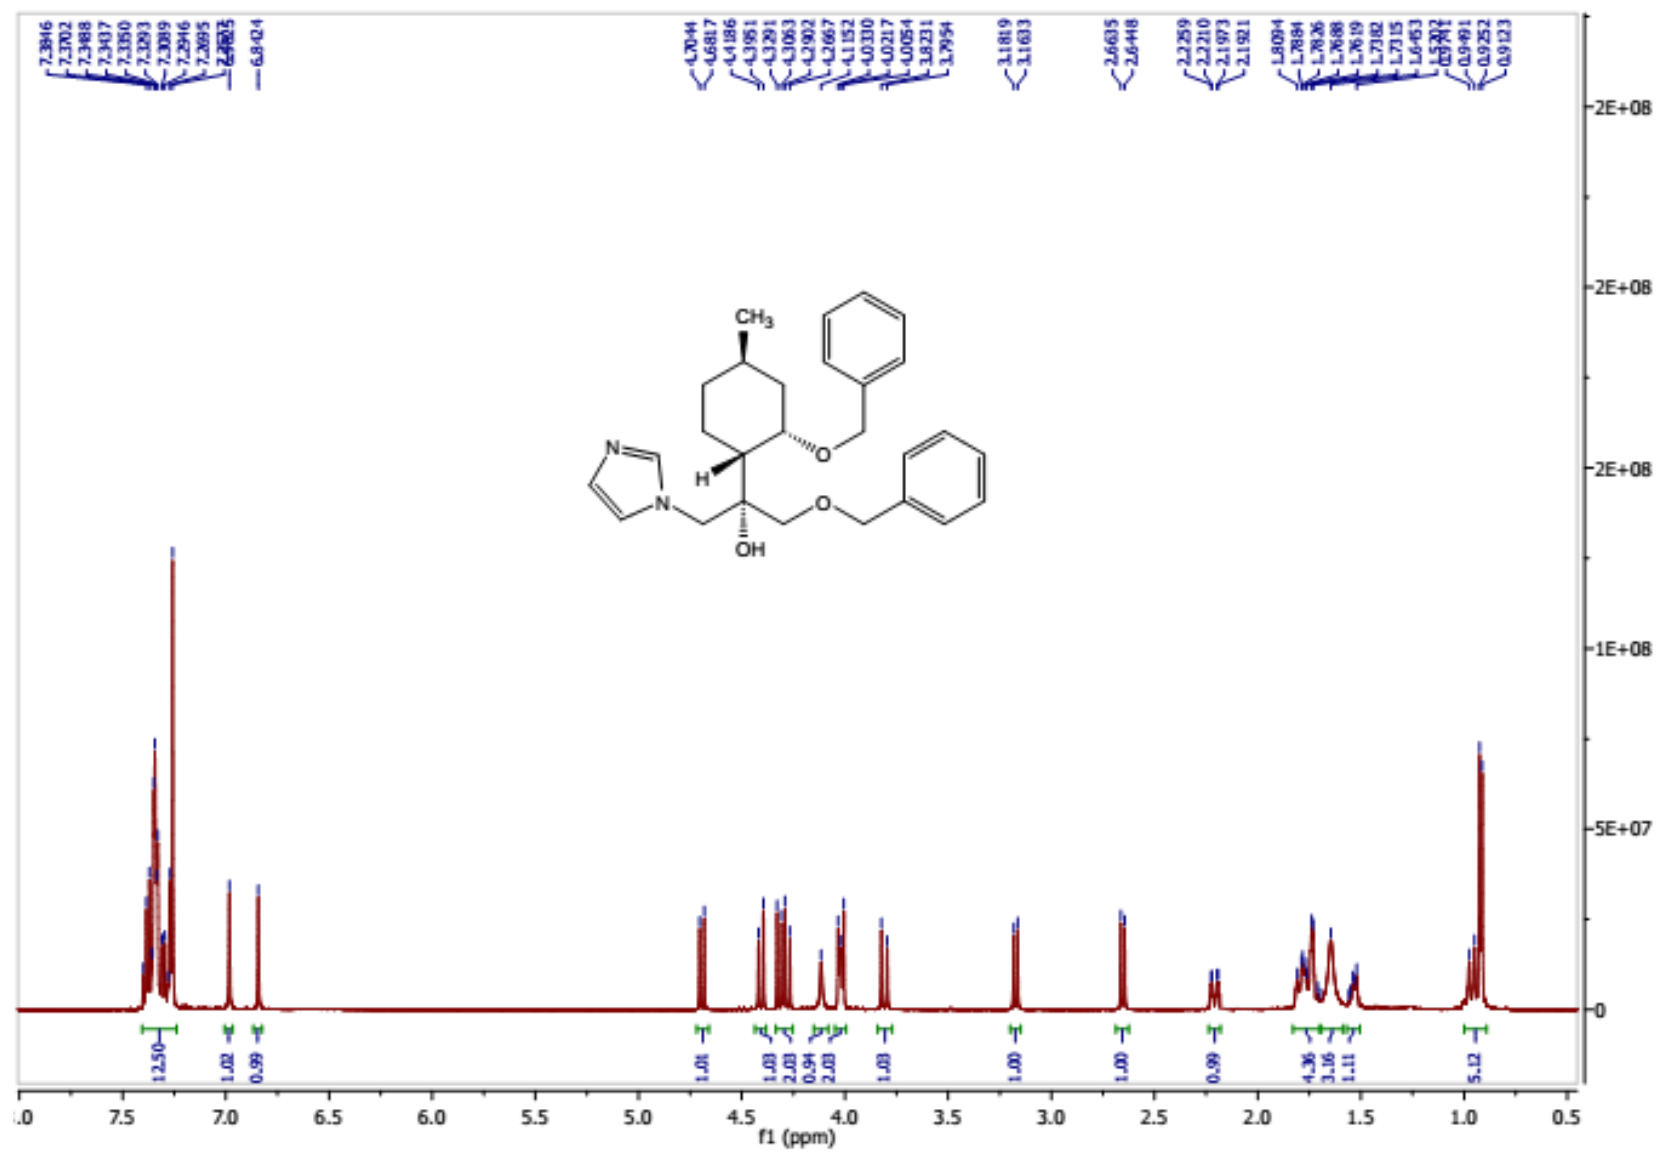

Figure S 59:  $^{13}\text{C}$ -NMR of compound **22a**

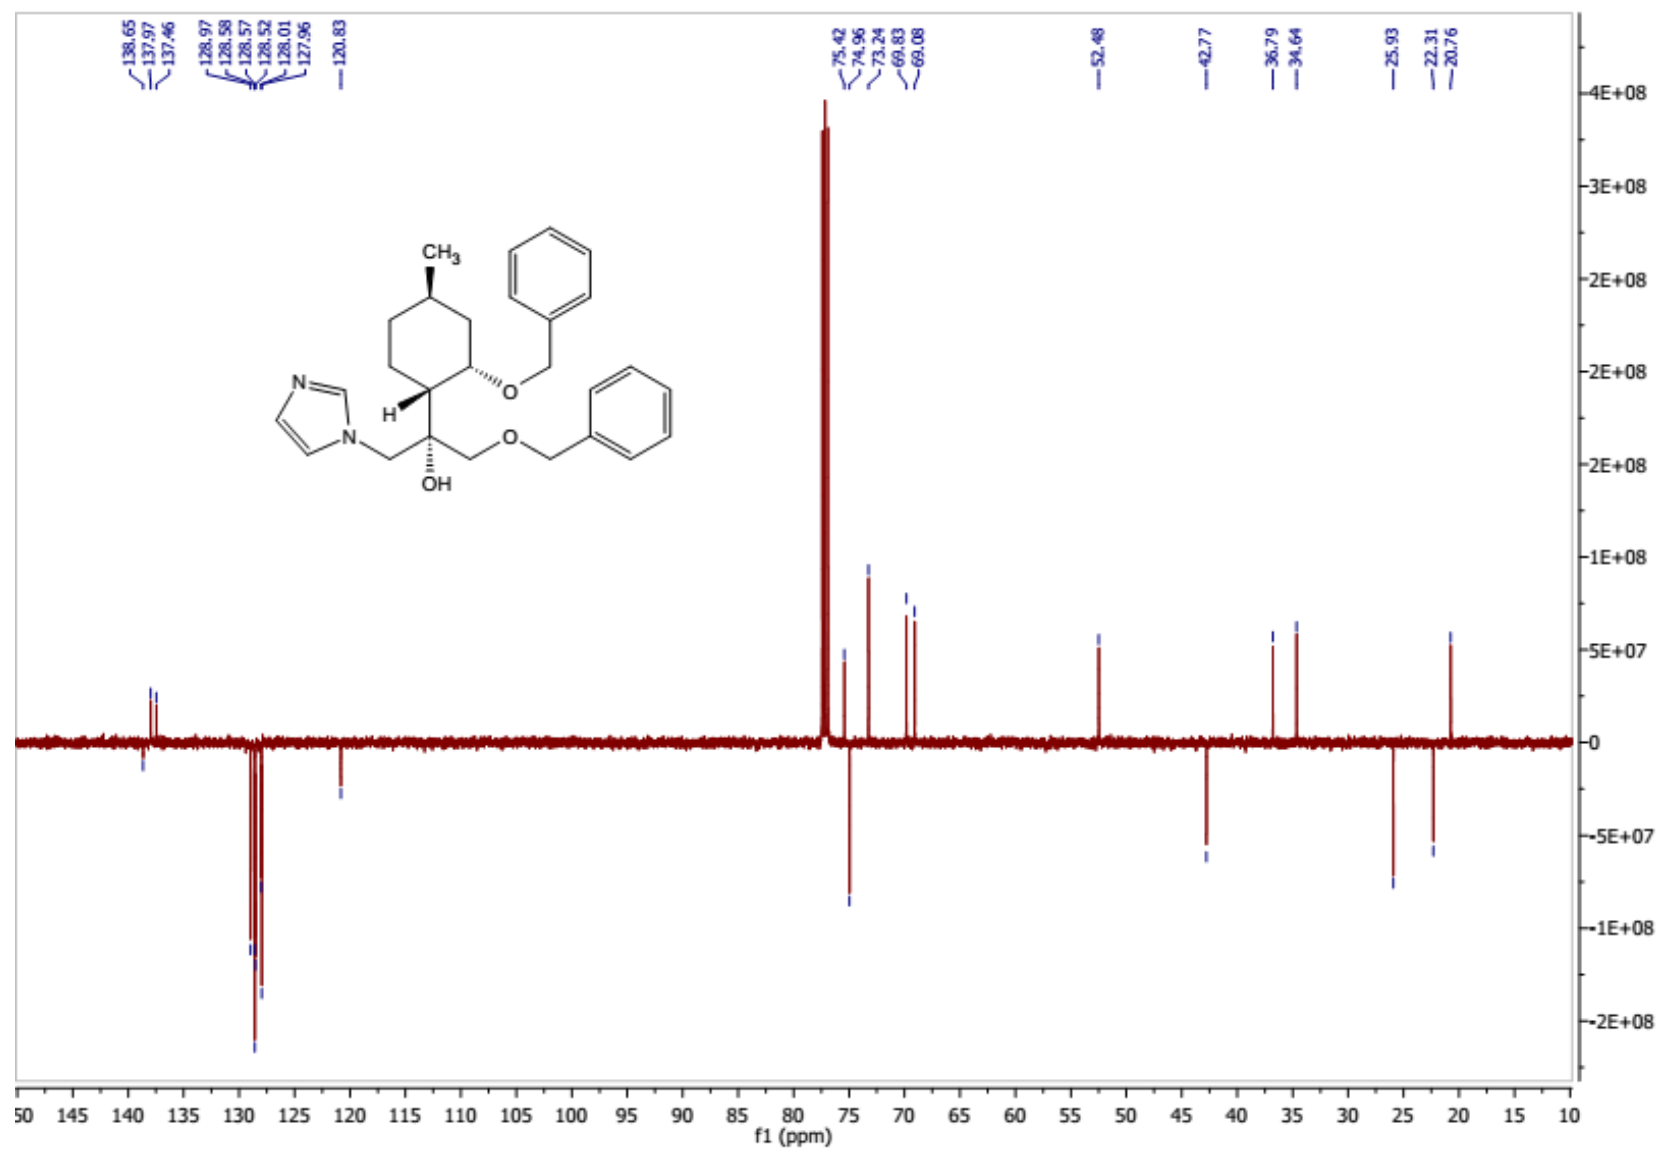

Figure S 60:  $^1\text{H}$ -NMR of compound **22b**

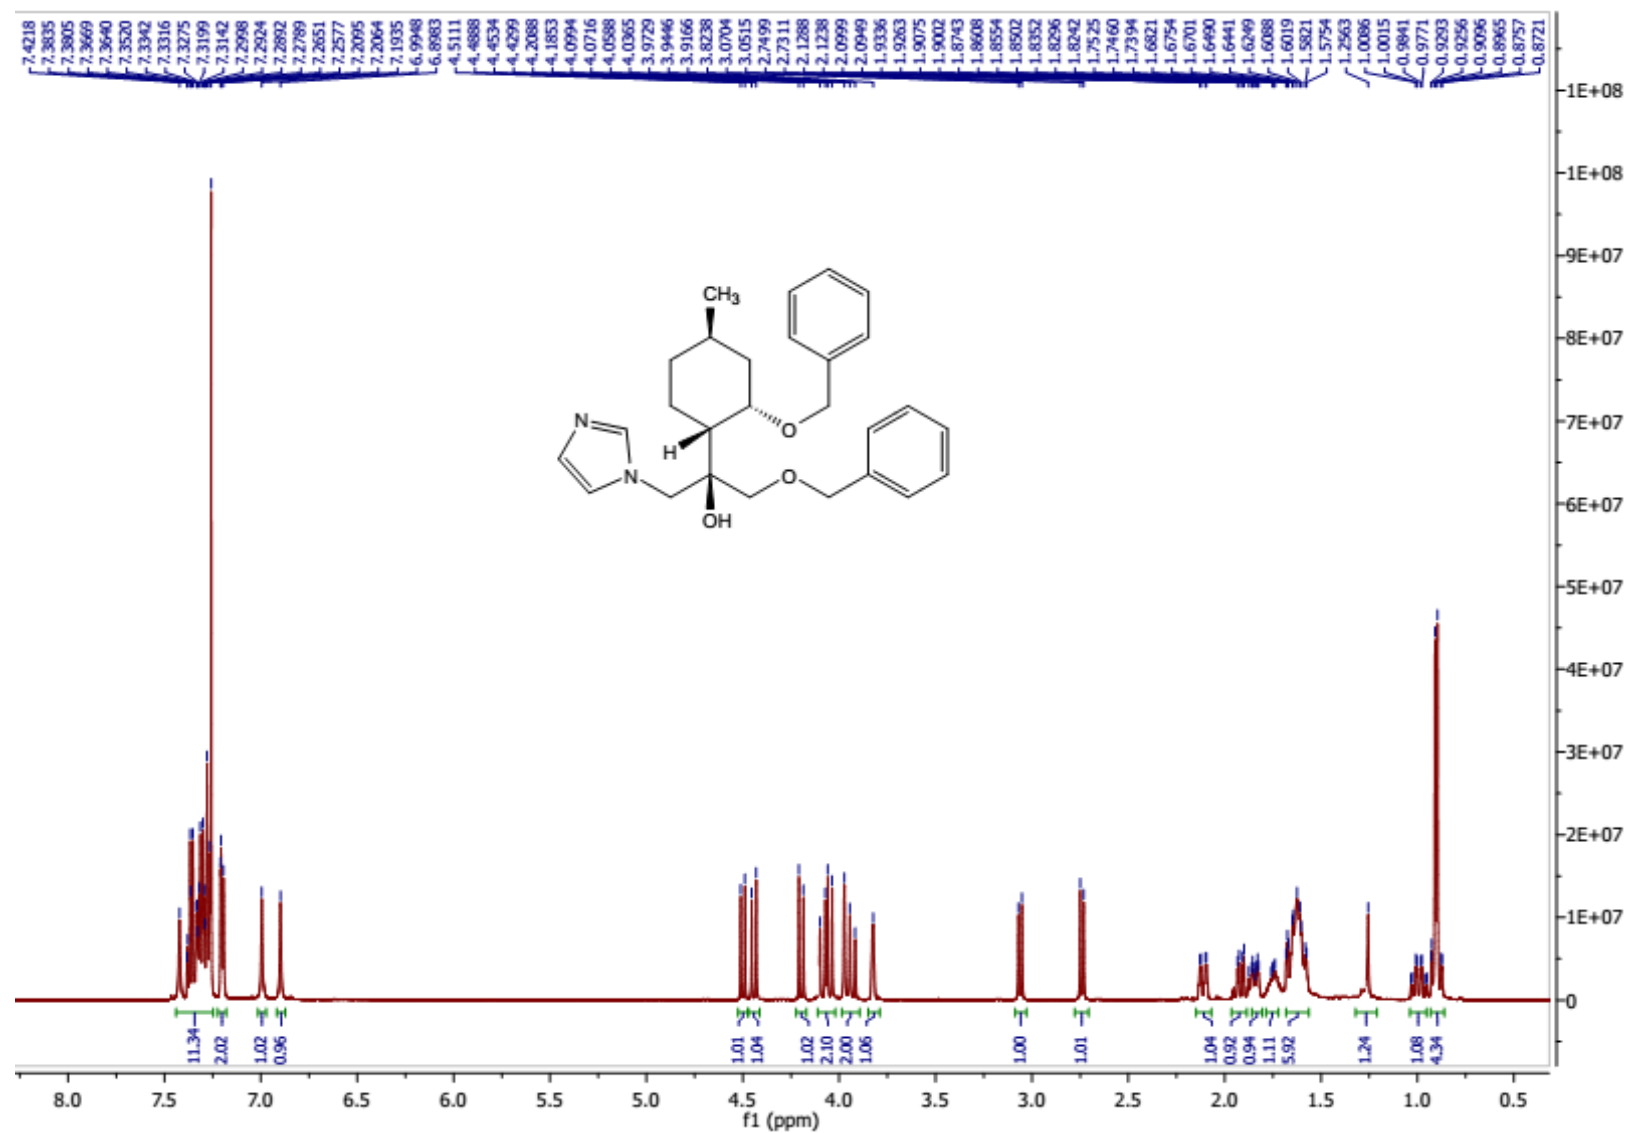

Figure S 61:  $^{13}\text{C}$ -NMR of compound **22b**

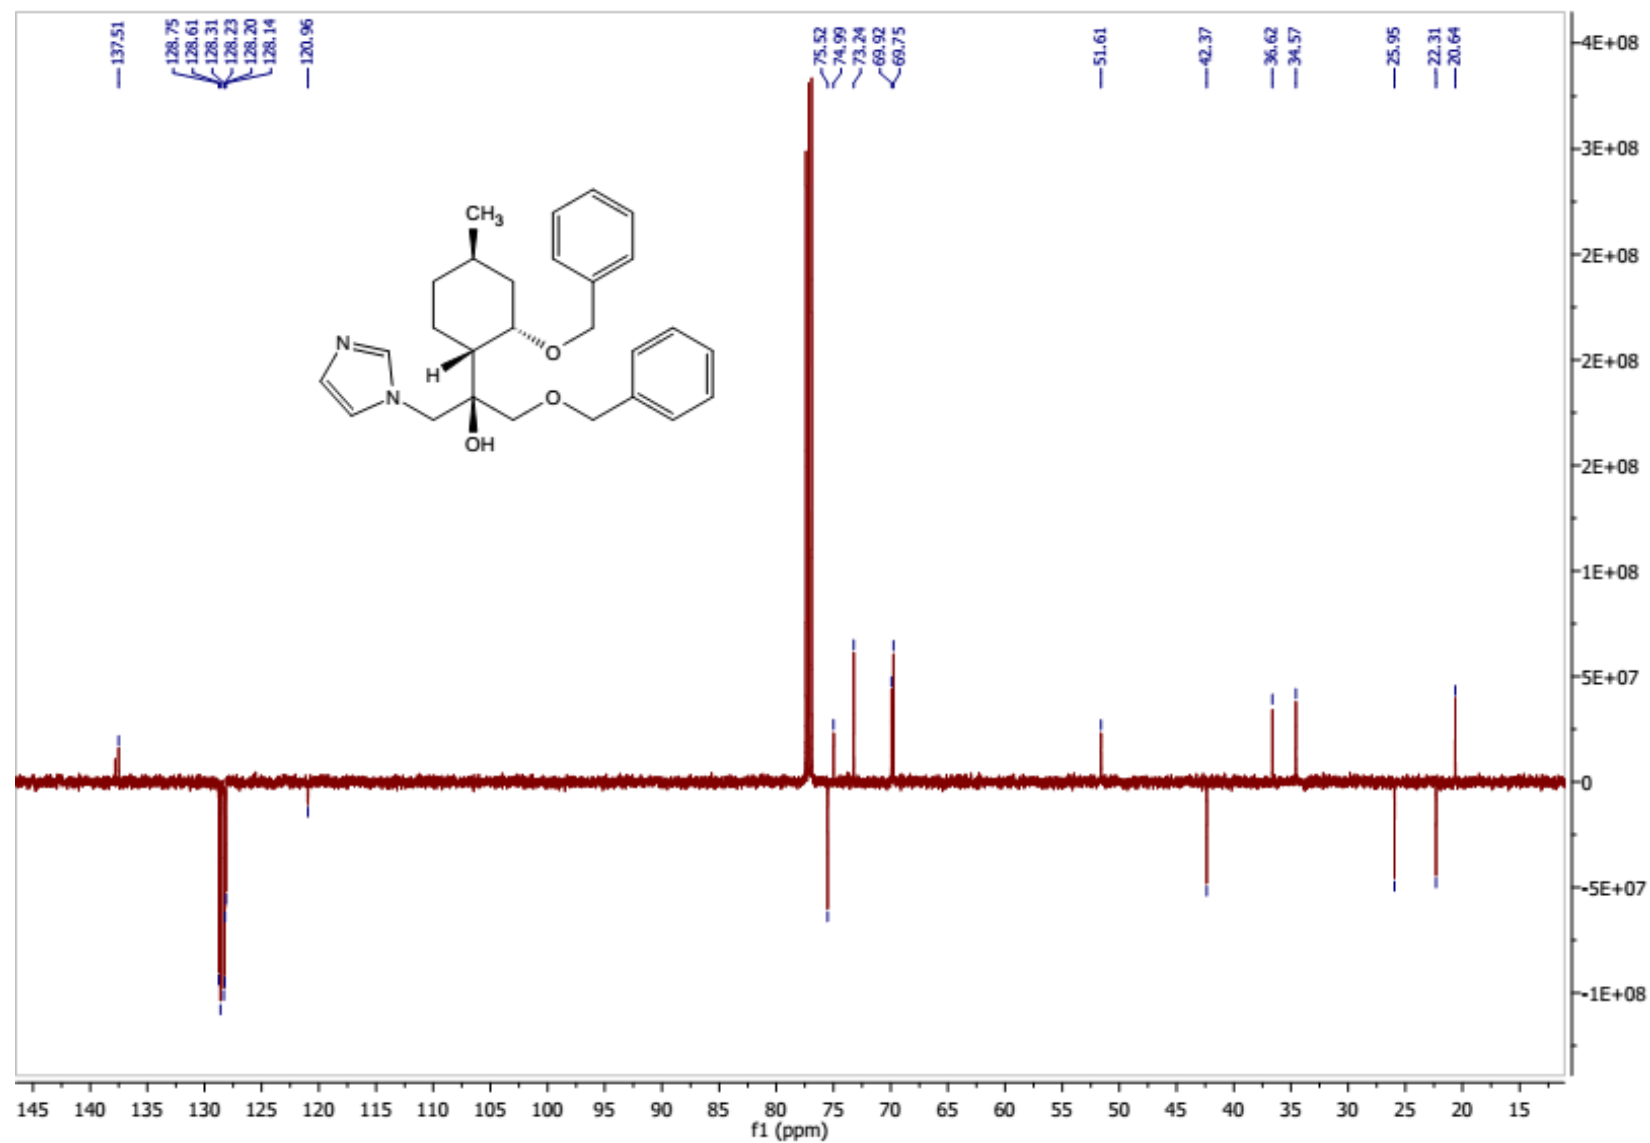

Figure S 62:  $^1\text{H}$ -NMR of compound **23a**

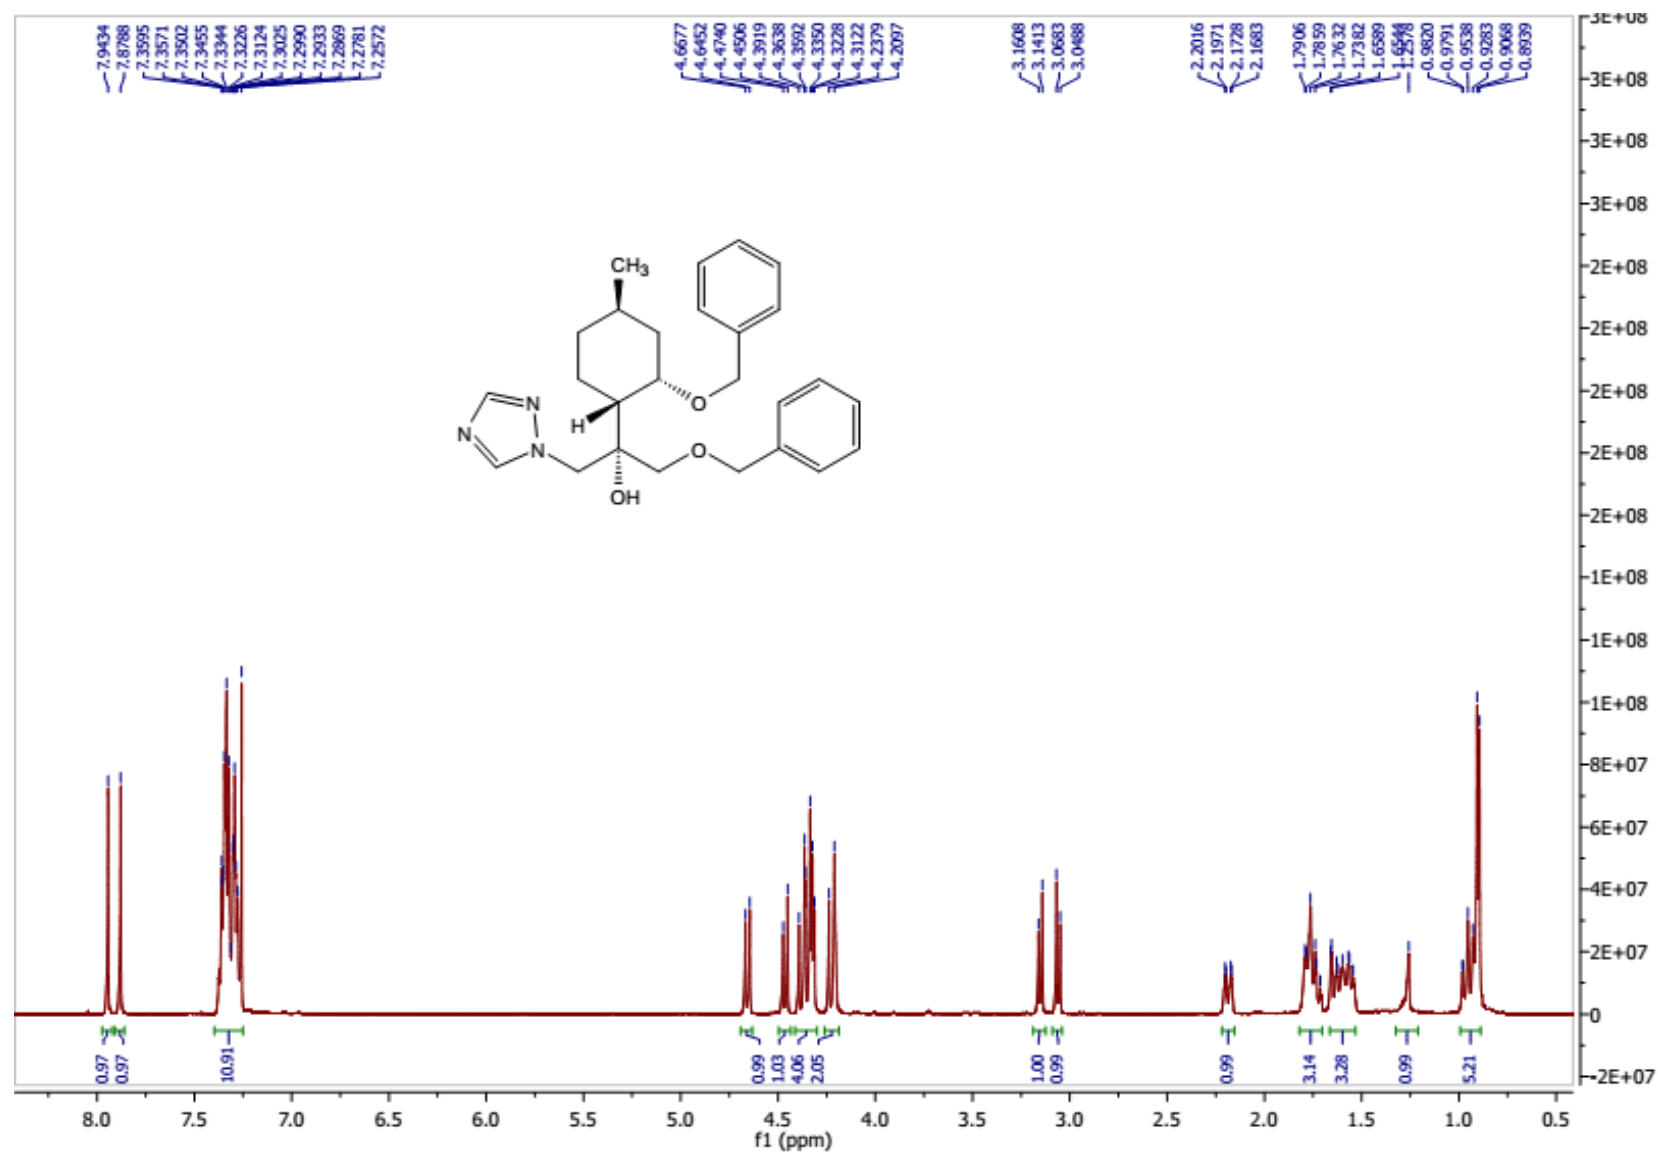

Figure S 63:  $^{13}\text{C}$ -NMR of compound **23a**

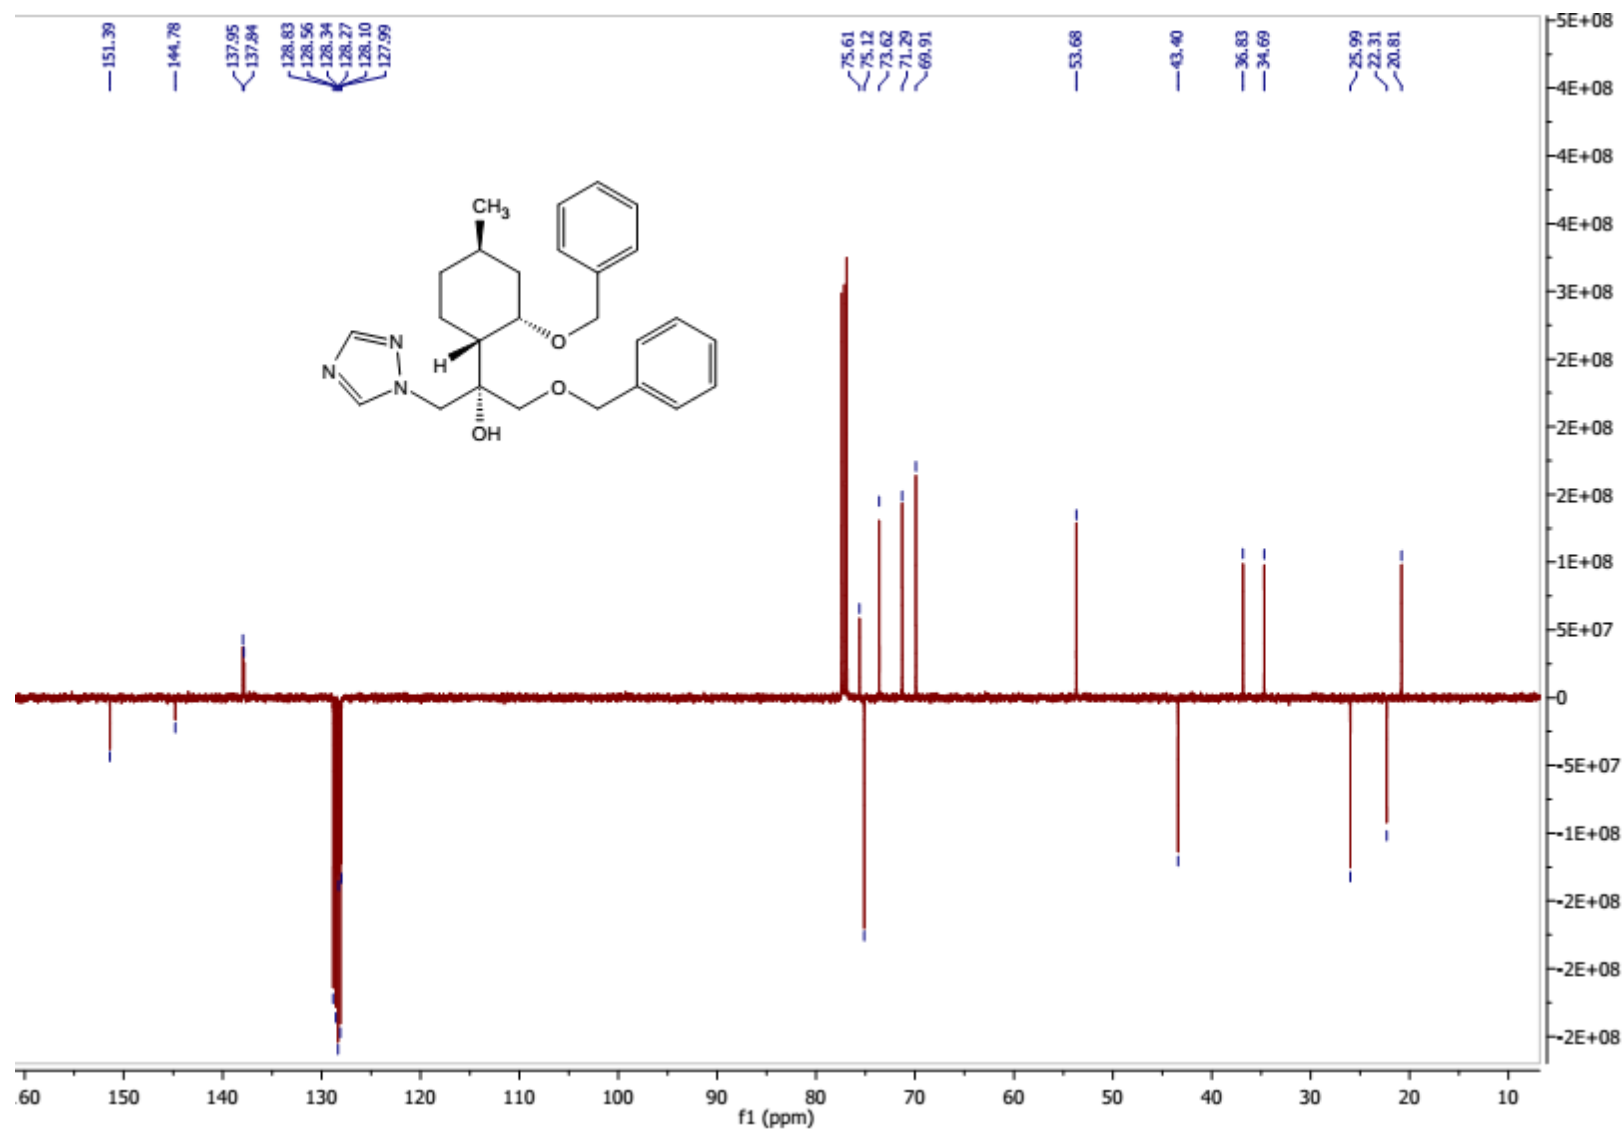

Figure S 64:  $^1\text{H}$ -NMR of compound **23b**

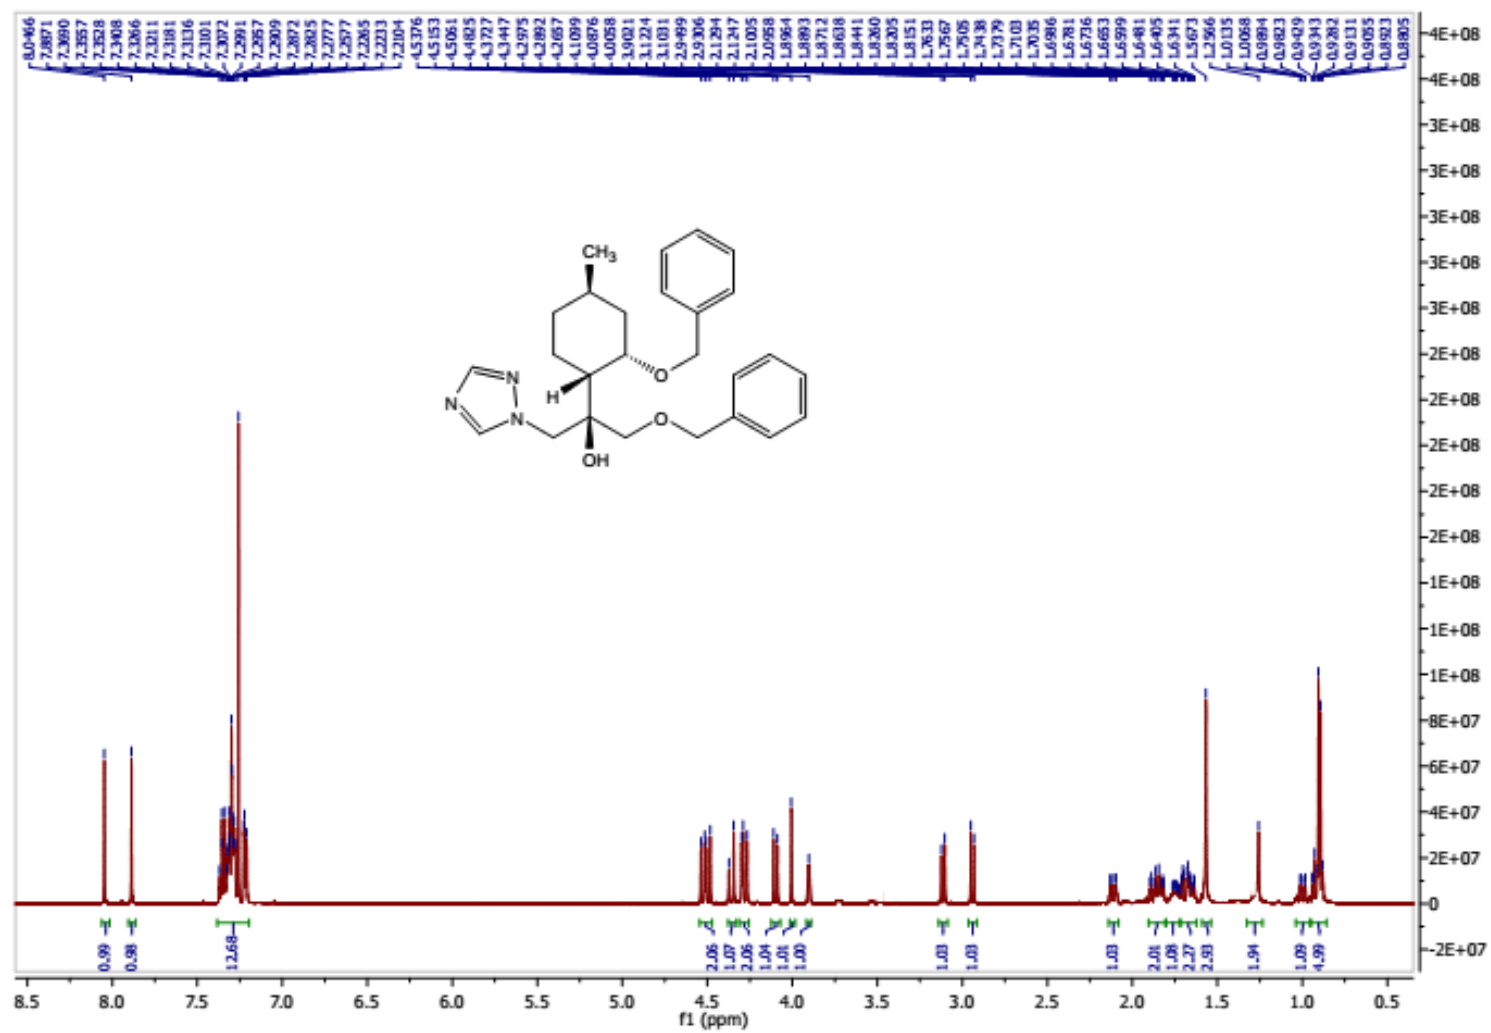

Figure S 65:  $^{13}\text{C}$ -NMR of compound **23b**

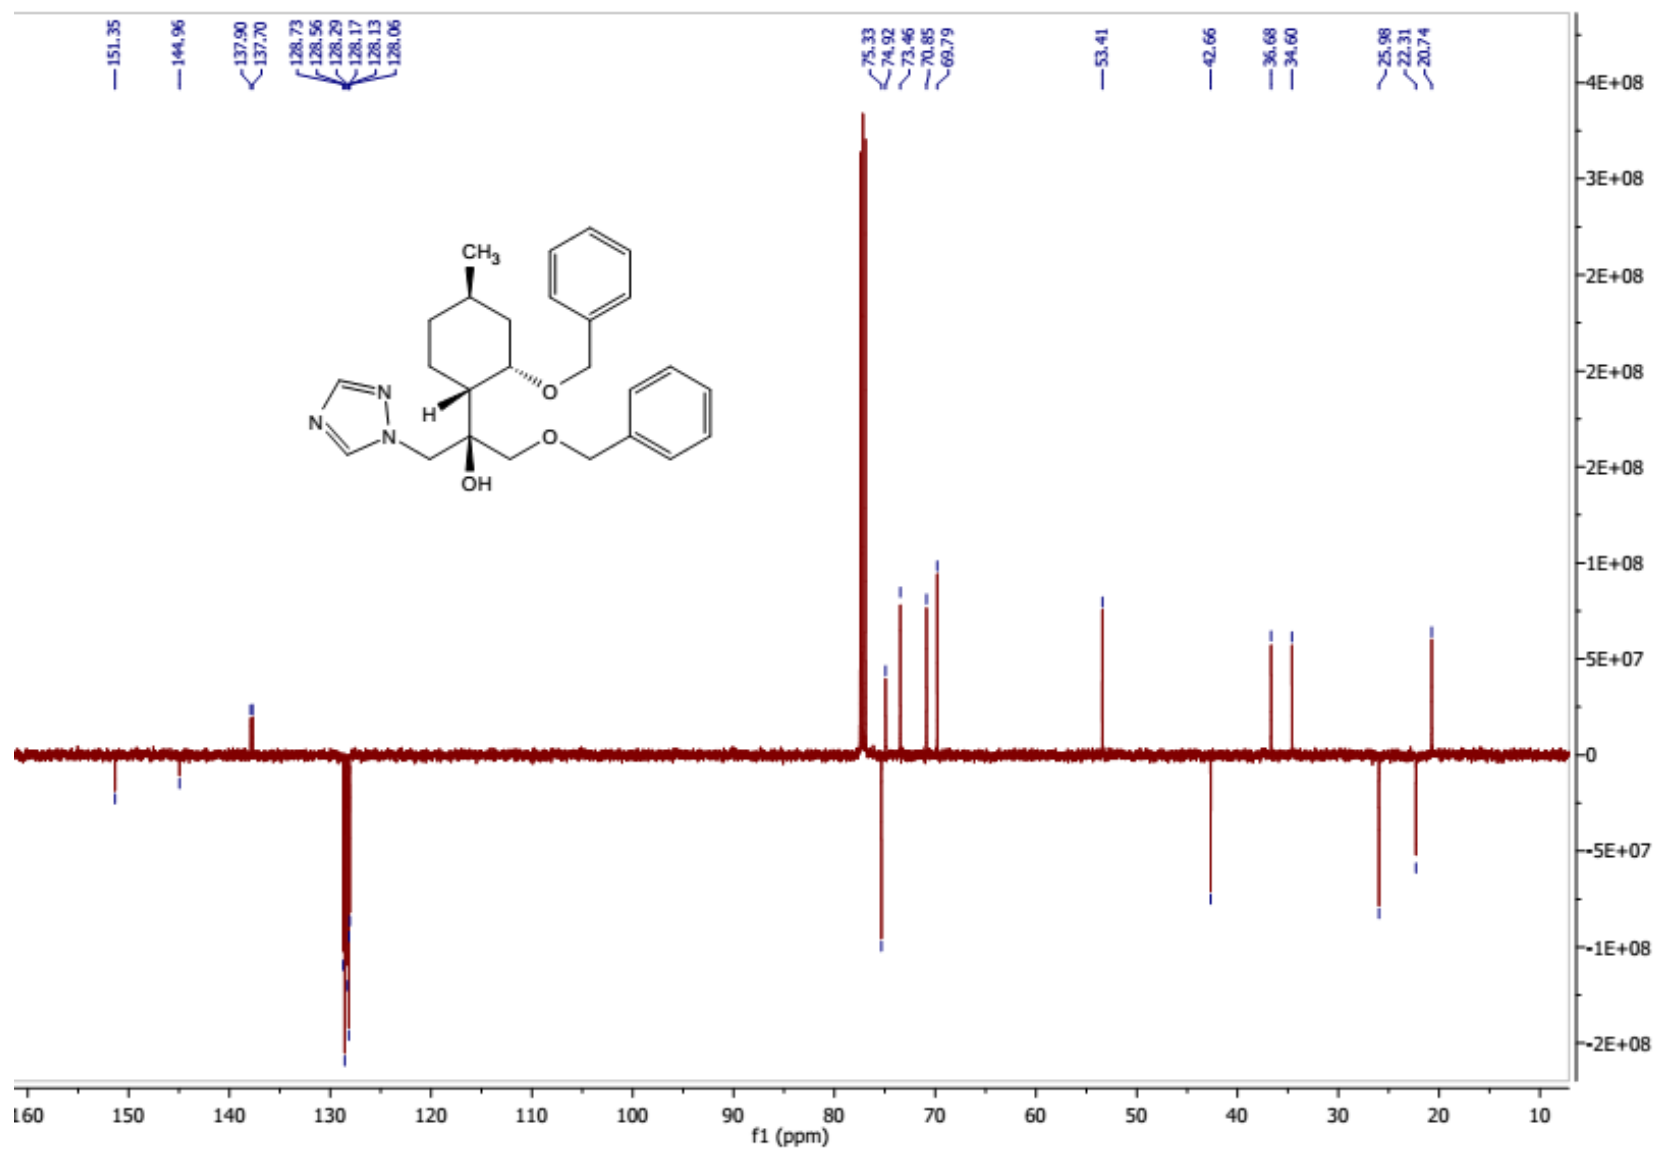



Figure S 66:  $^1\text{H}$ -NMR of compound **24a**

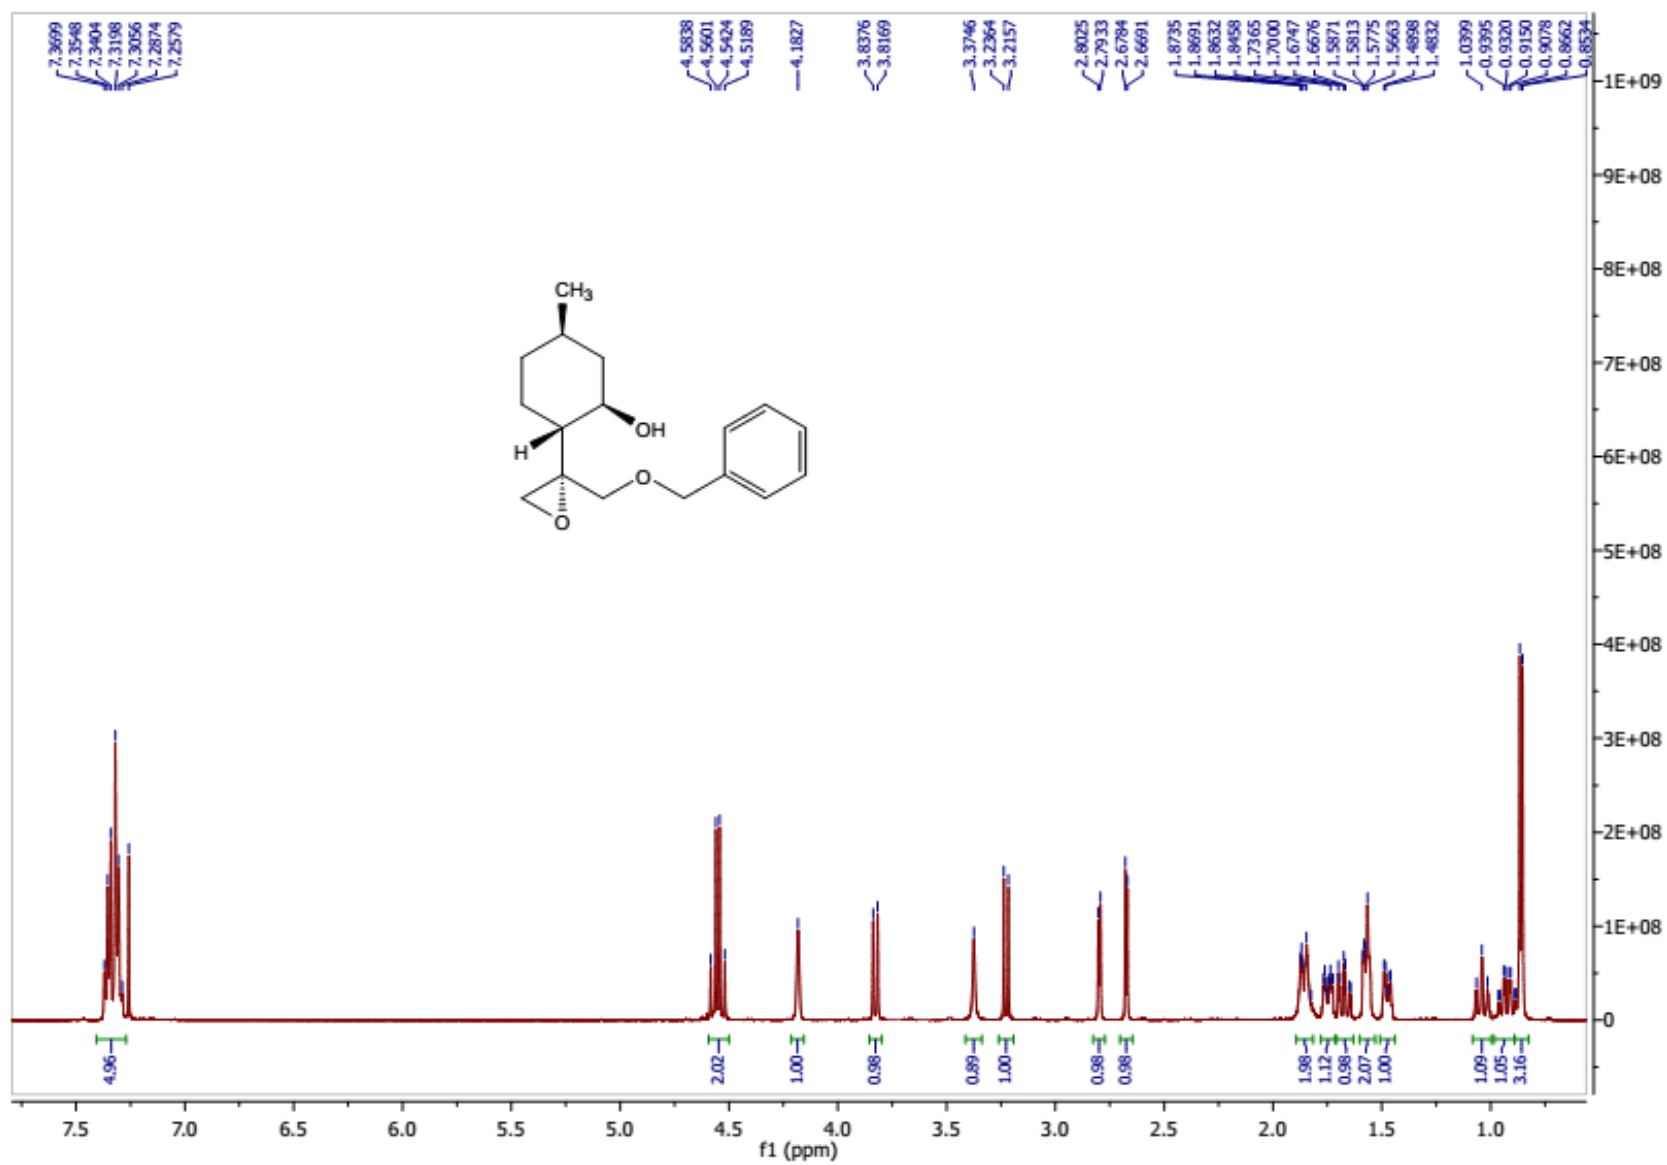

Figure S 67:  $^{13}\text{C}$ -NMR of compound **24a**

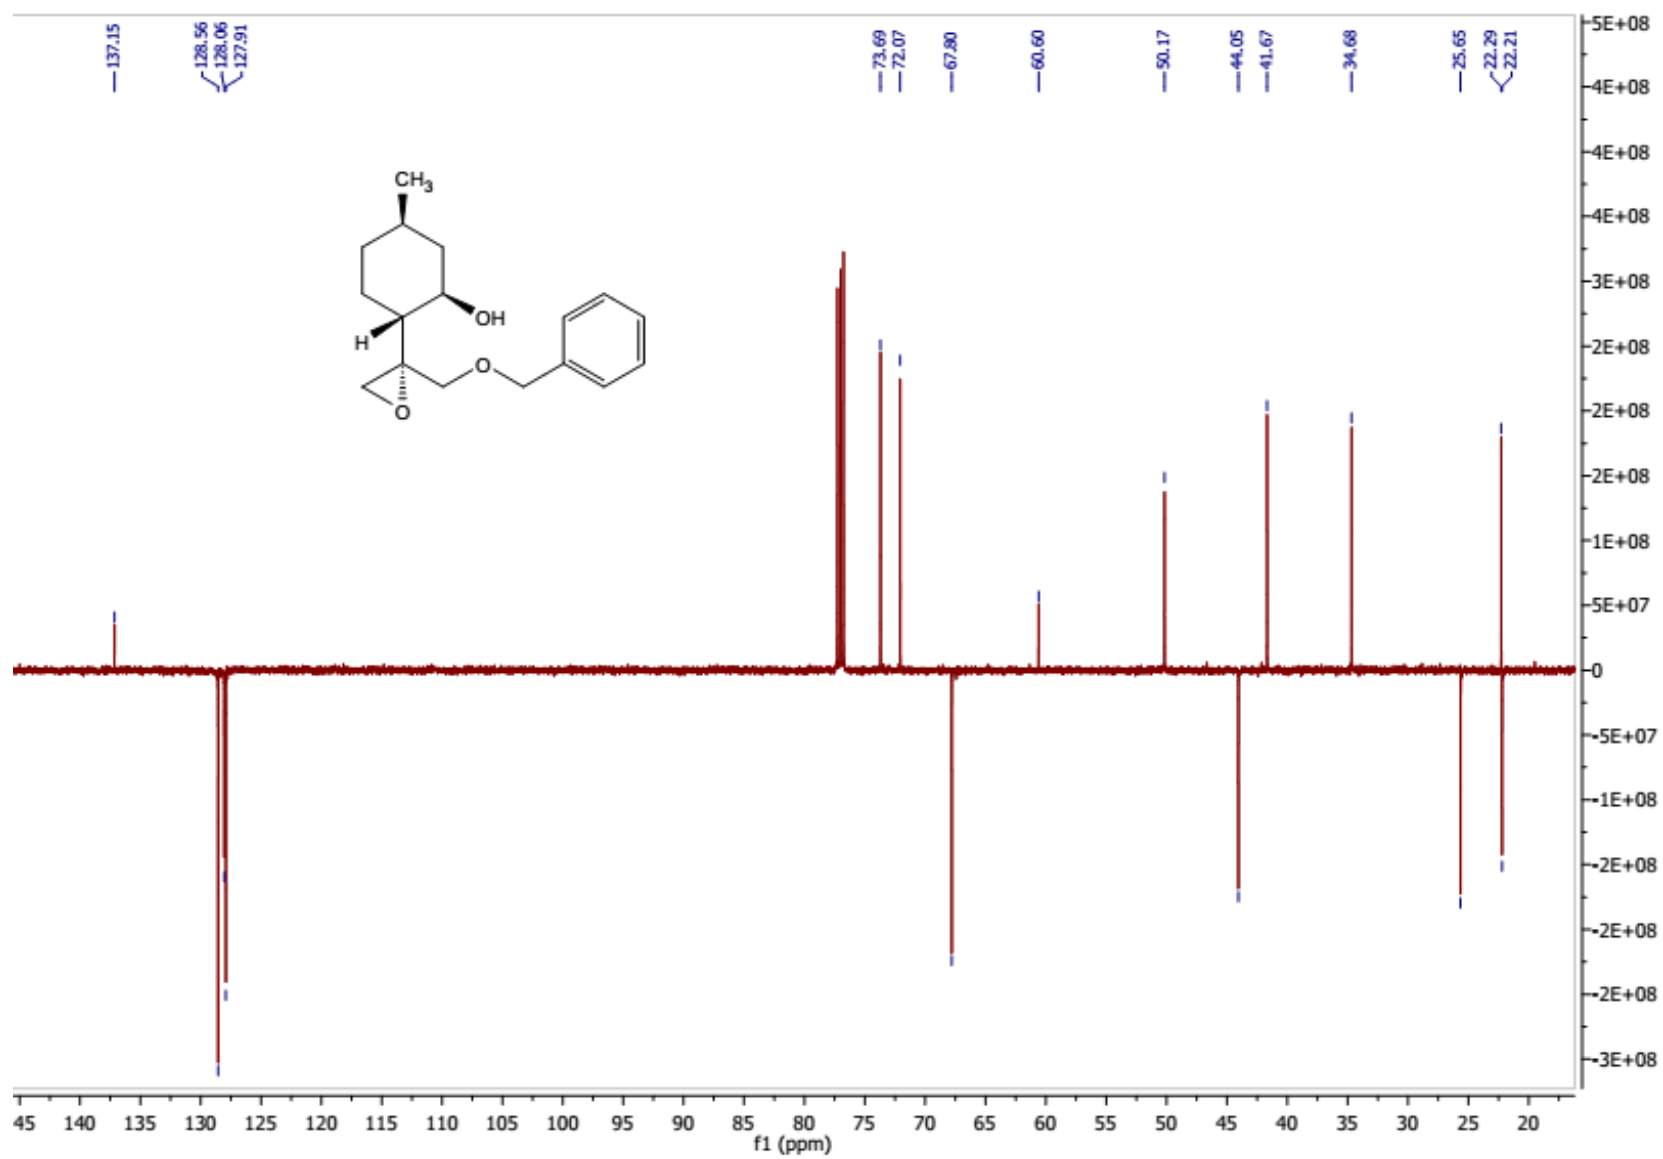

Figure S 68:  $^1\text{H}$ -NMR of compound **24b**

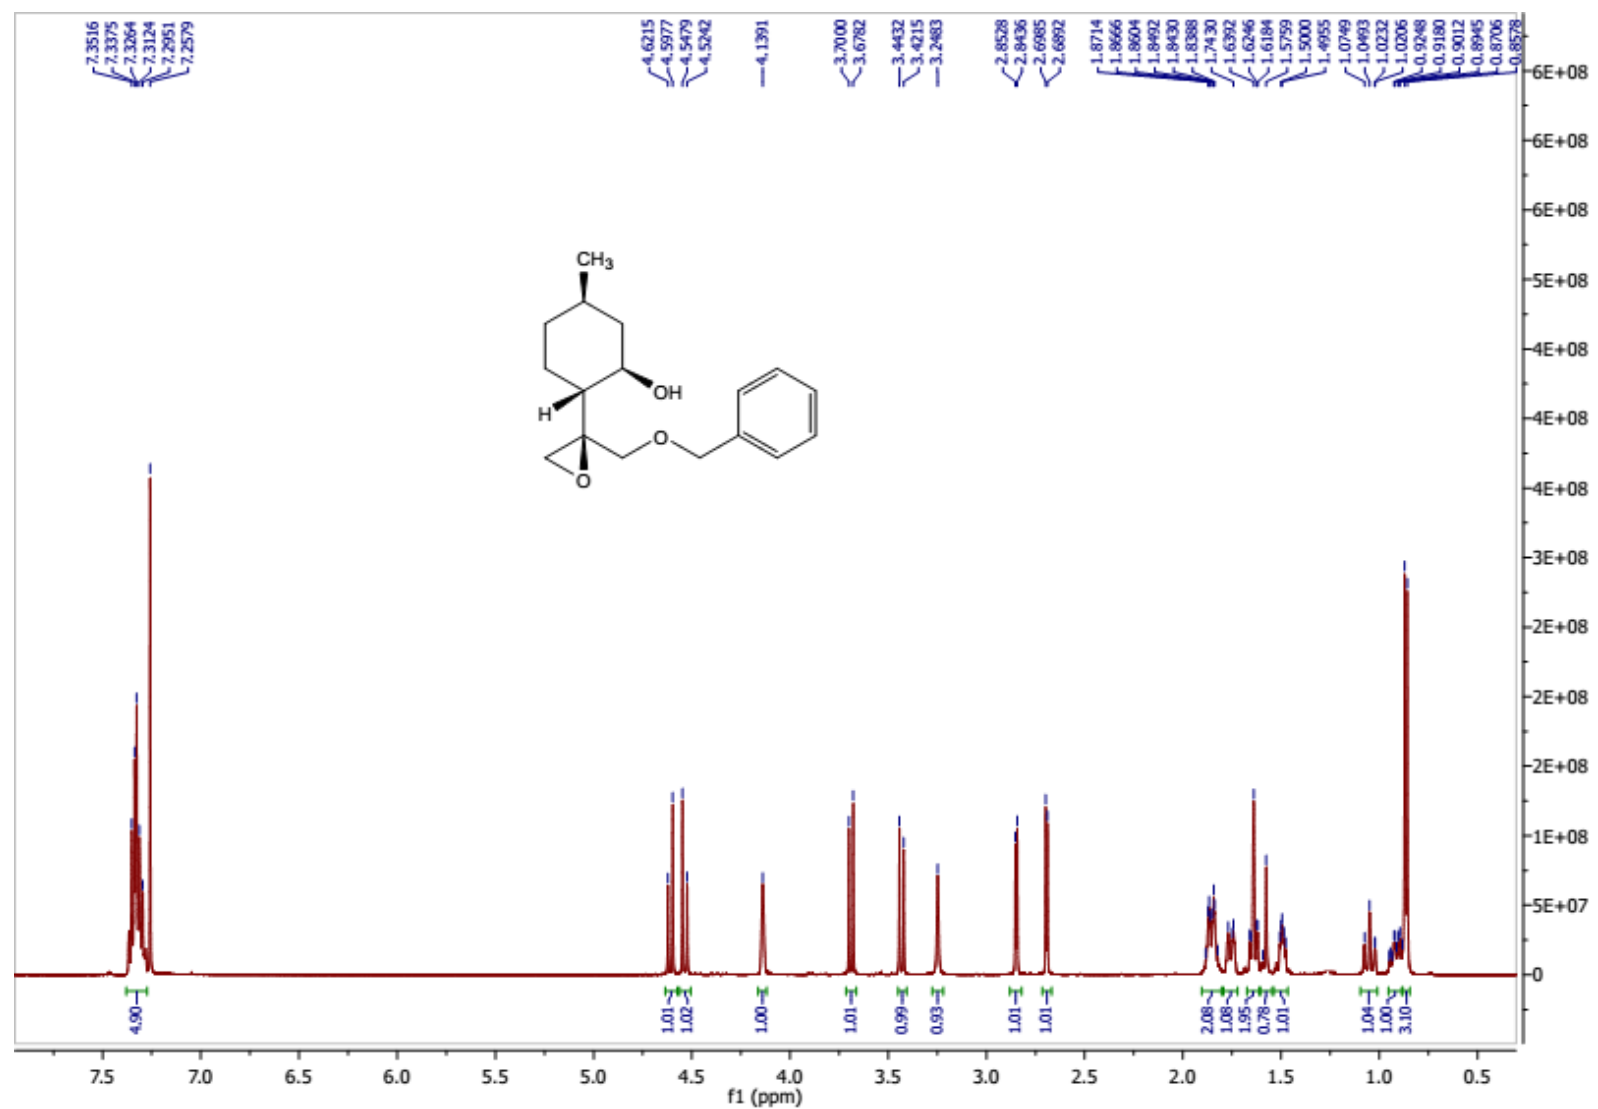

Figure S 69:  $^{13}\text{C}$ -NMR of compound **24b**

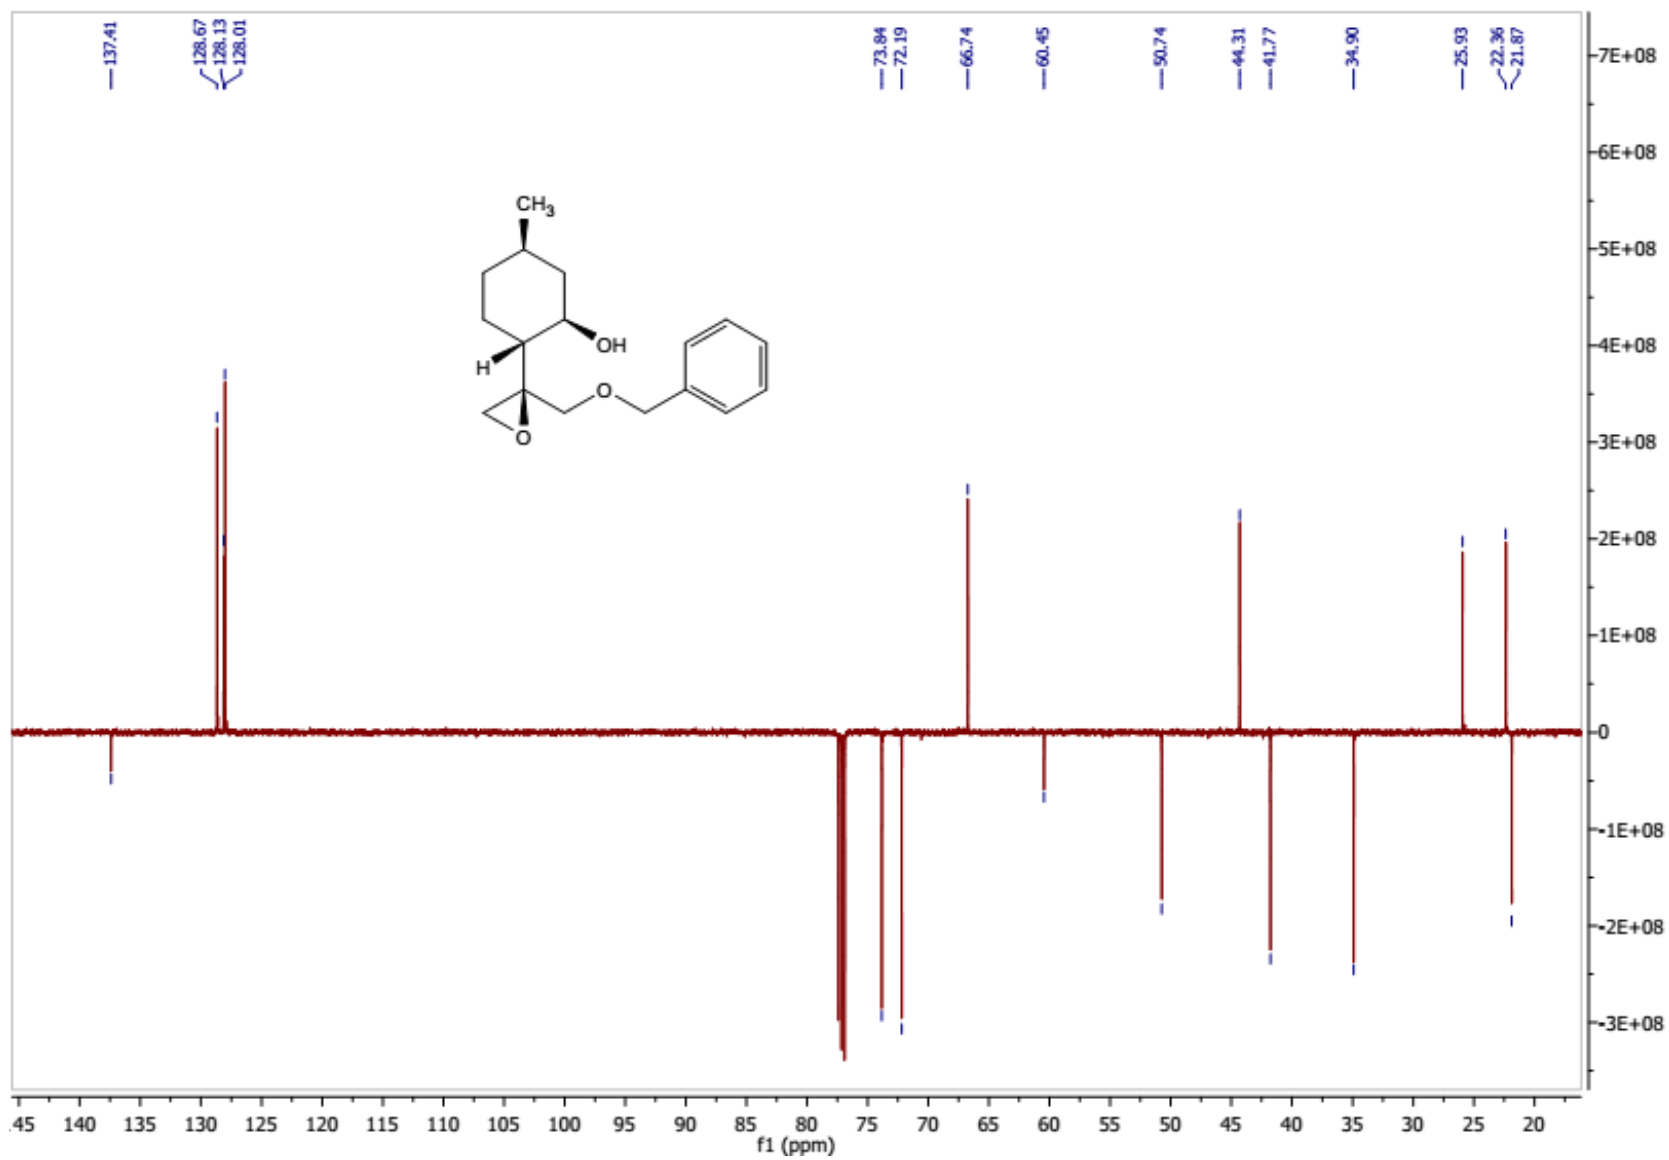

Figure S 70:  $^1\text{H}$ -NMR of compound **25a**

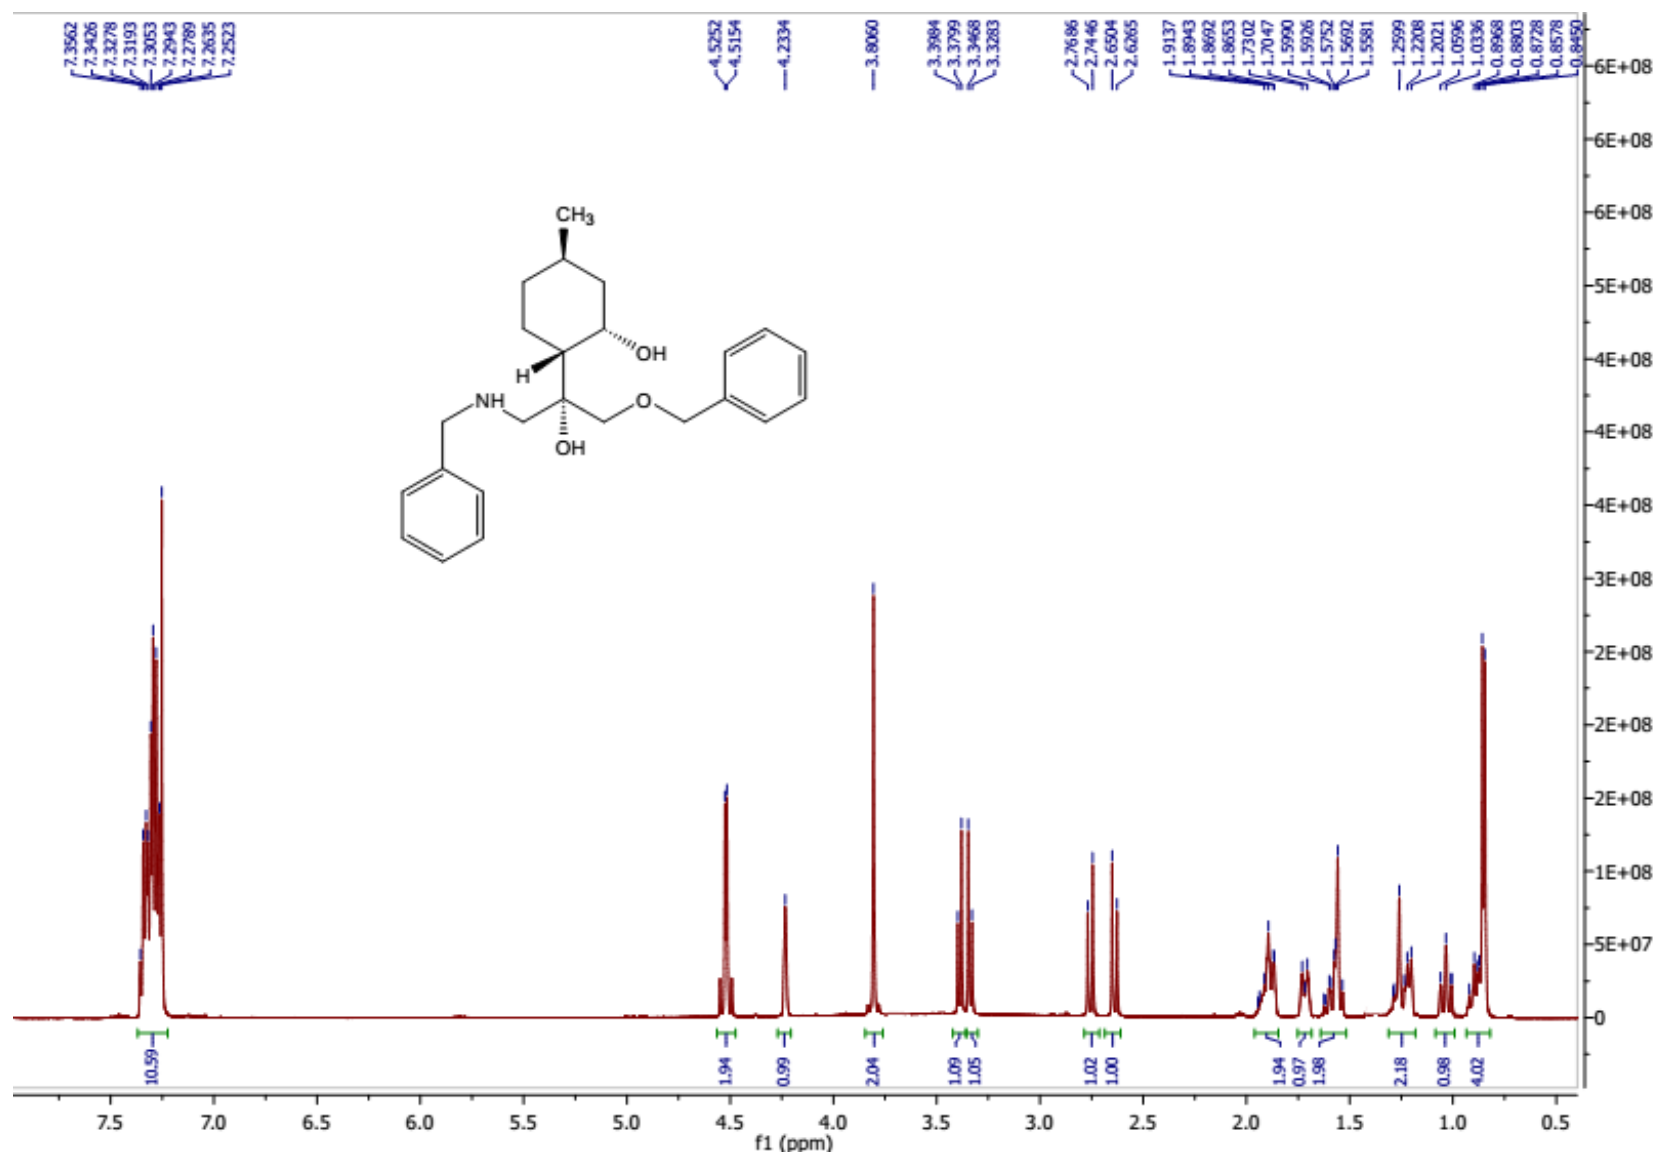

Figure S 71:  $^{13}\text{C}$ -NMR of compound **25a**

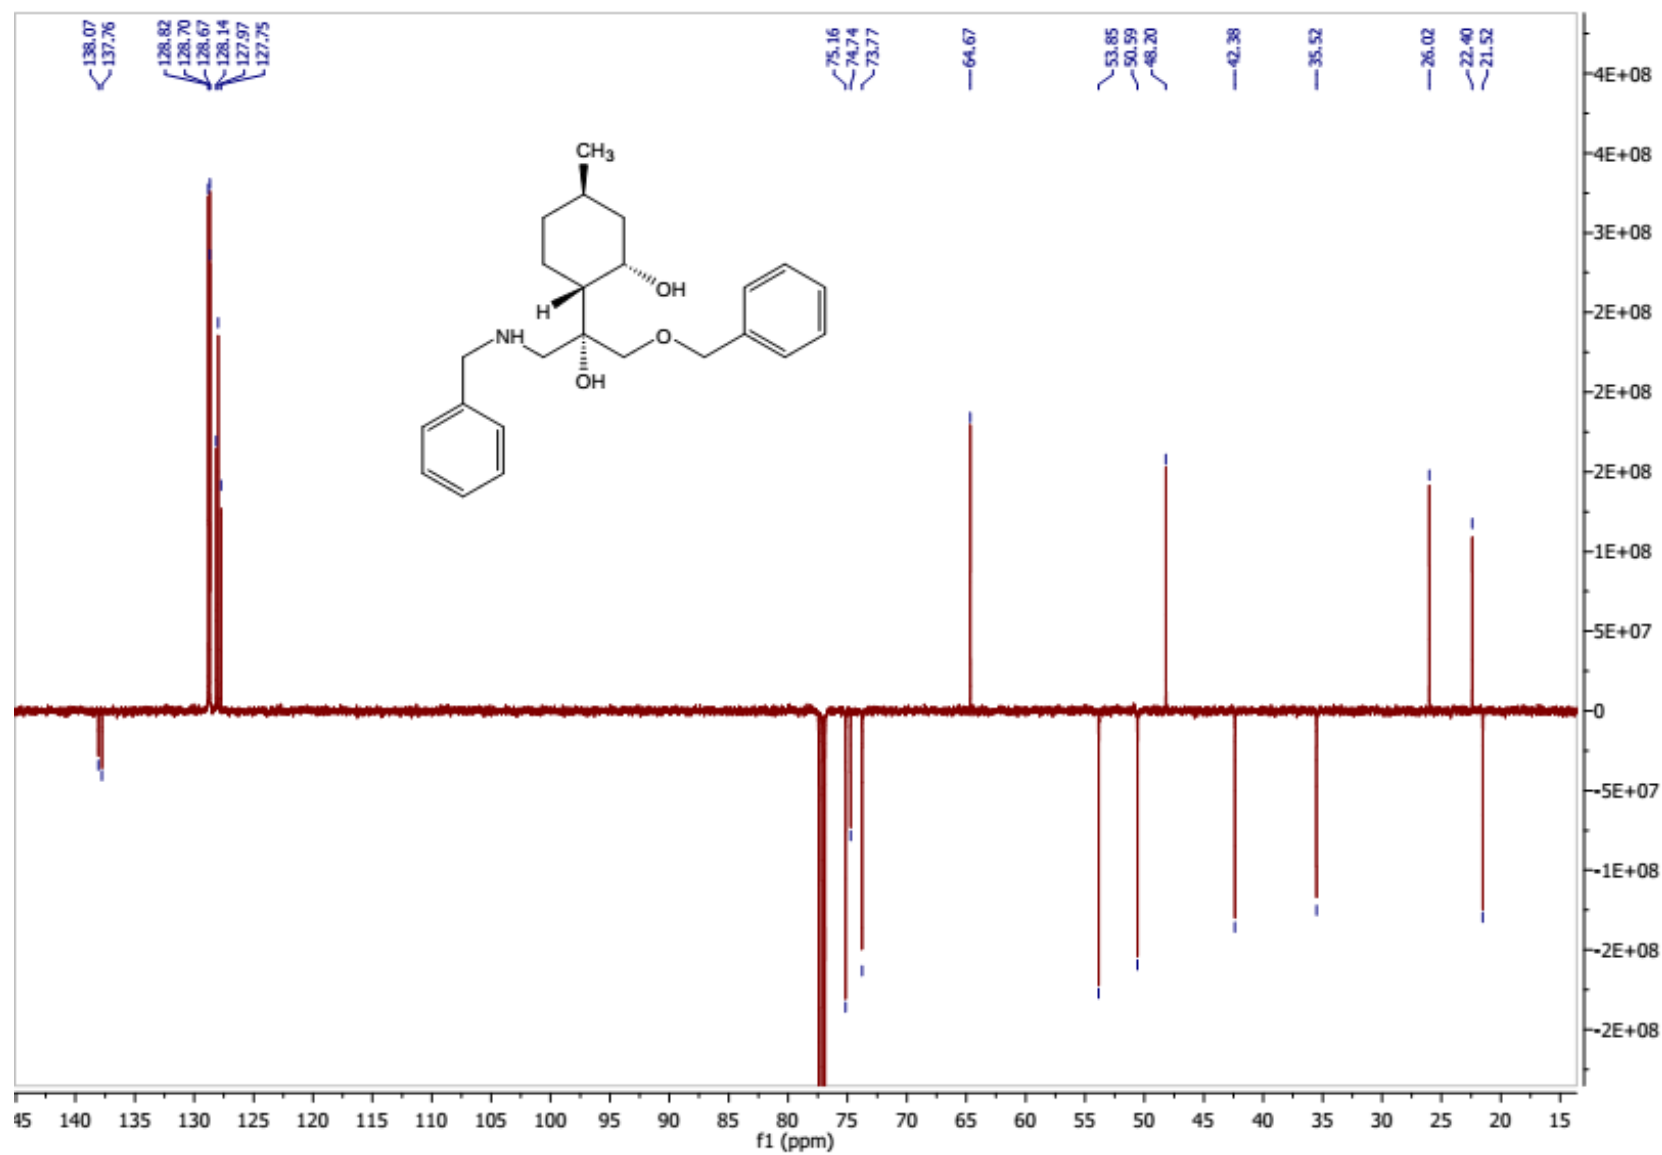

Figure S 72:  $^1\text{H}$ -NMR of compound **25b**

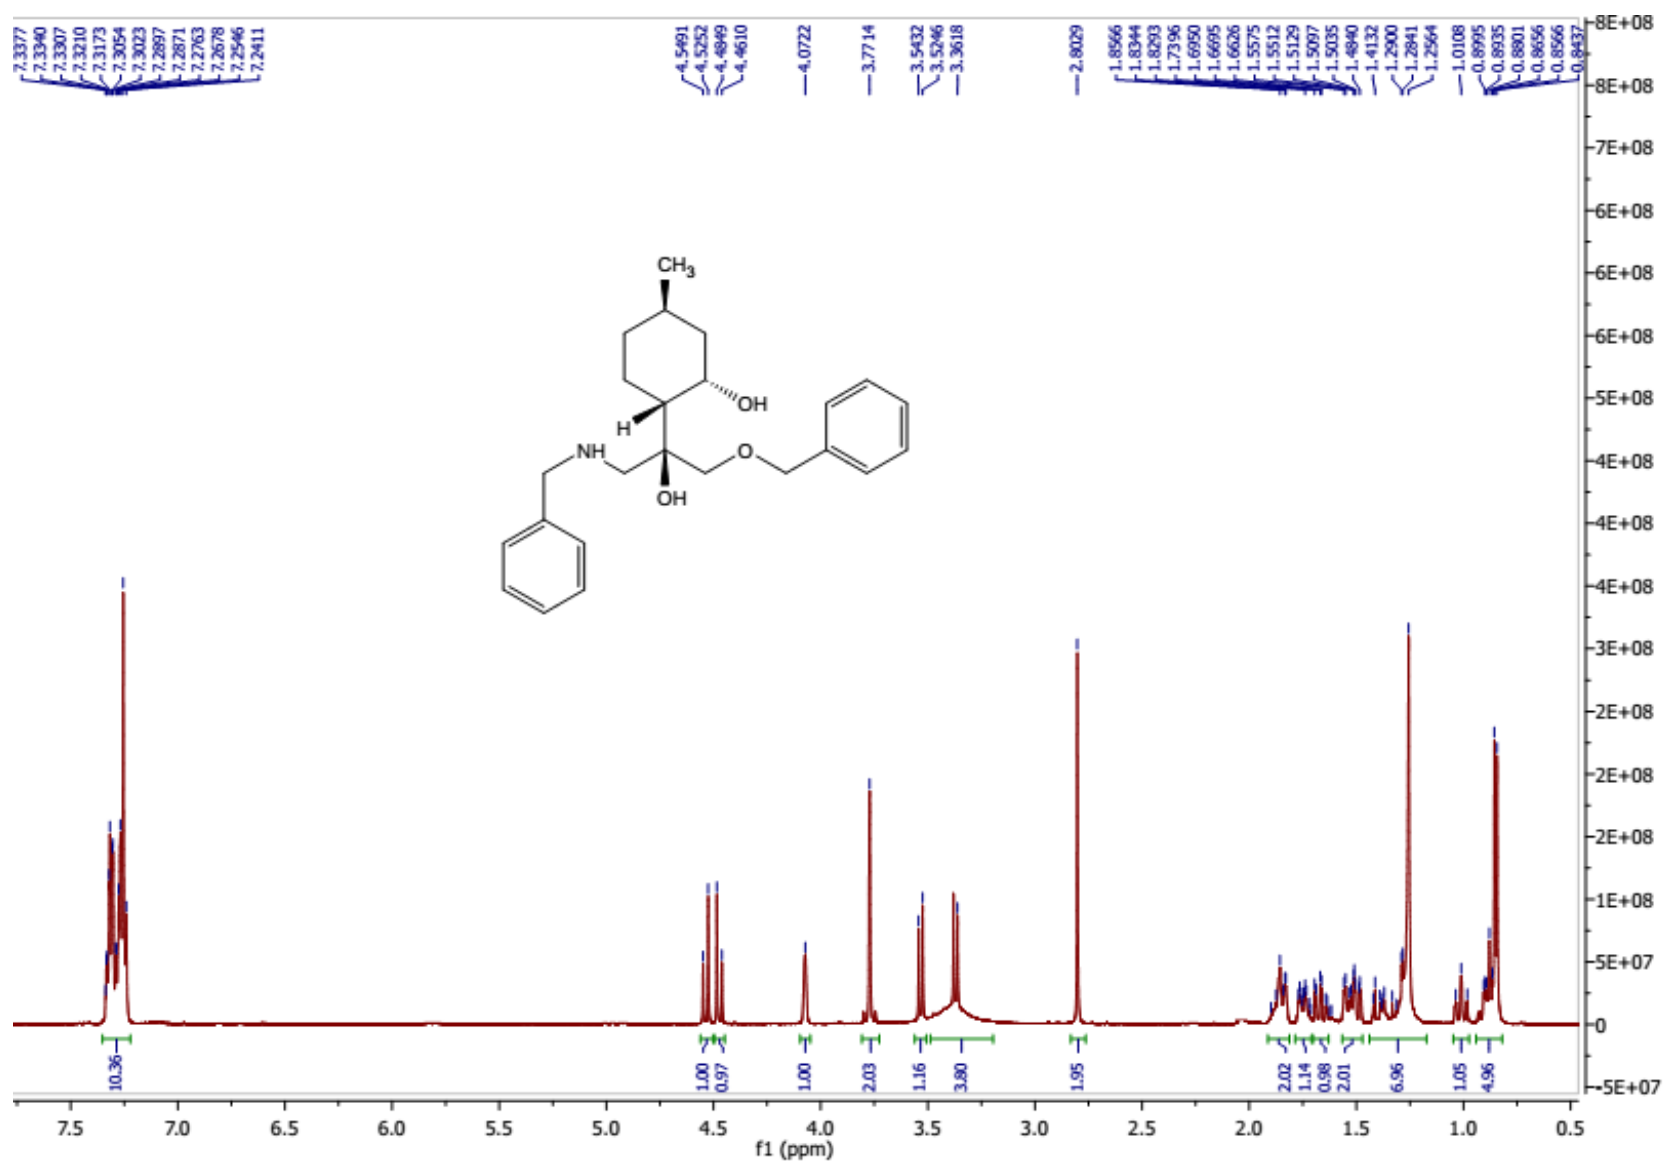

Figure S 73:  $^{13}\text{C}$ -NMR of compound **25b**

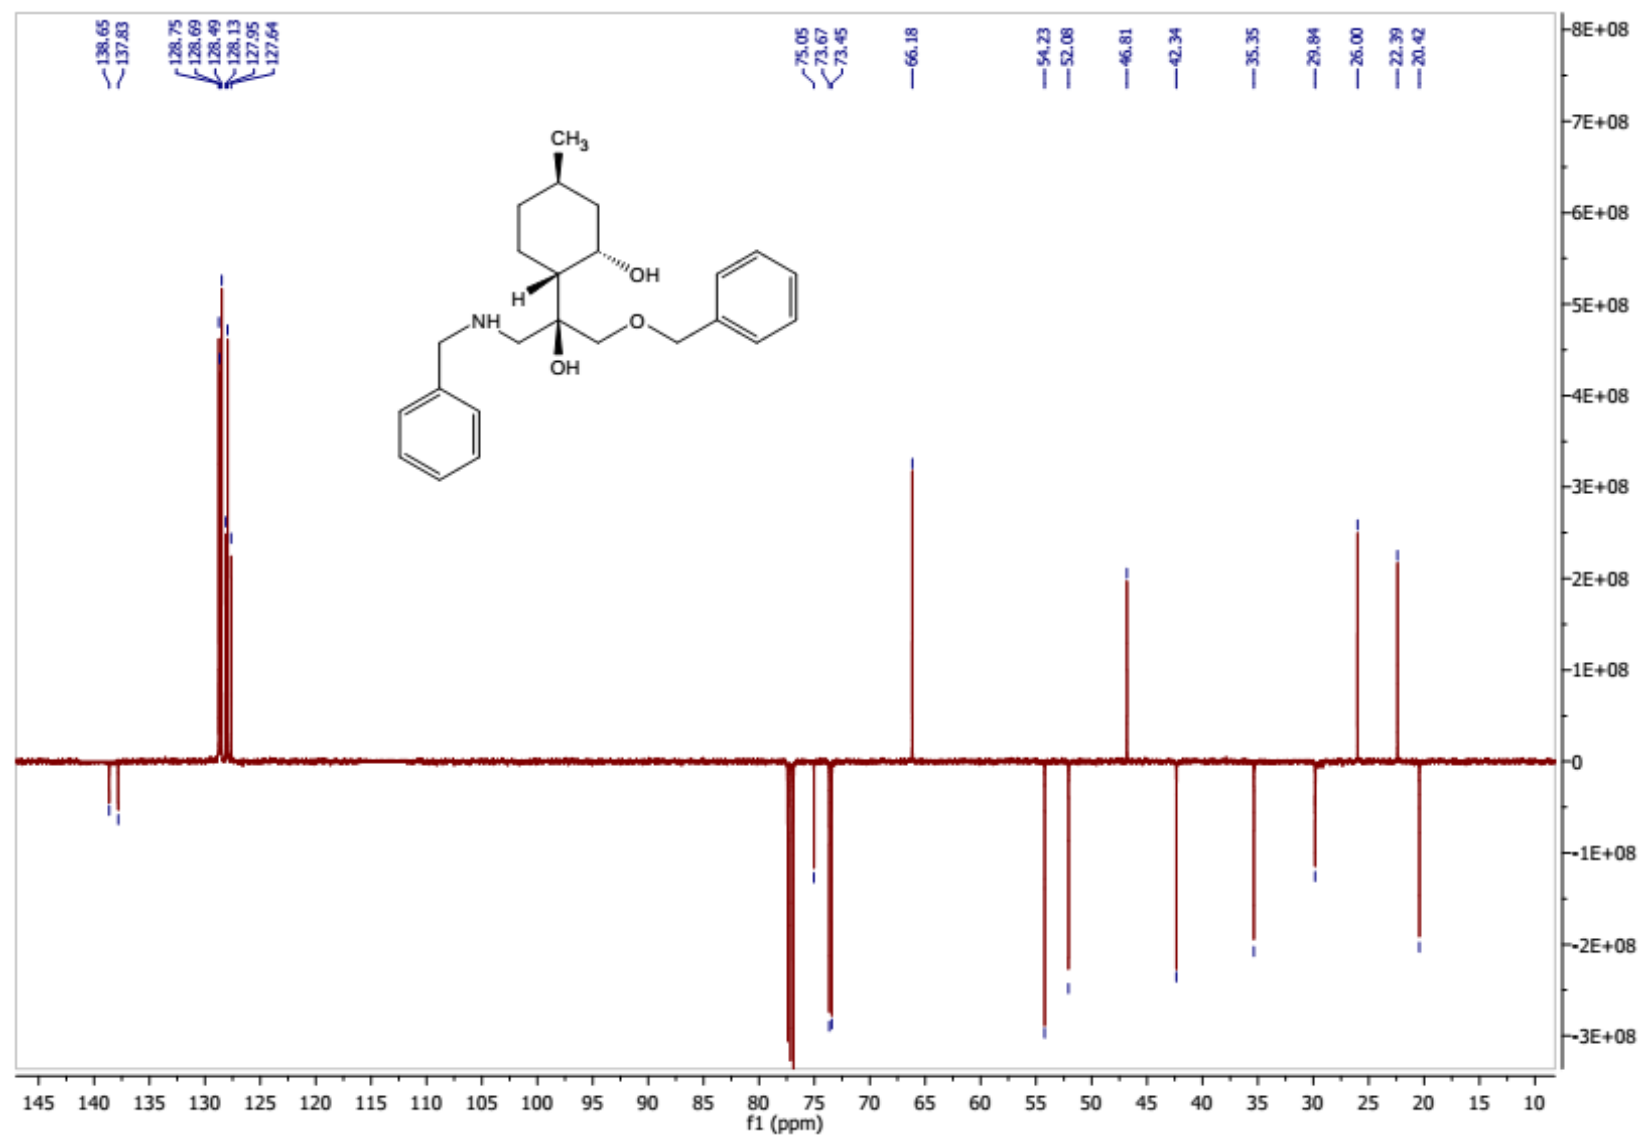



Figure S 74:  $^1\text{H}$ -NMR of compound 26a

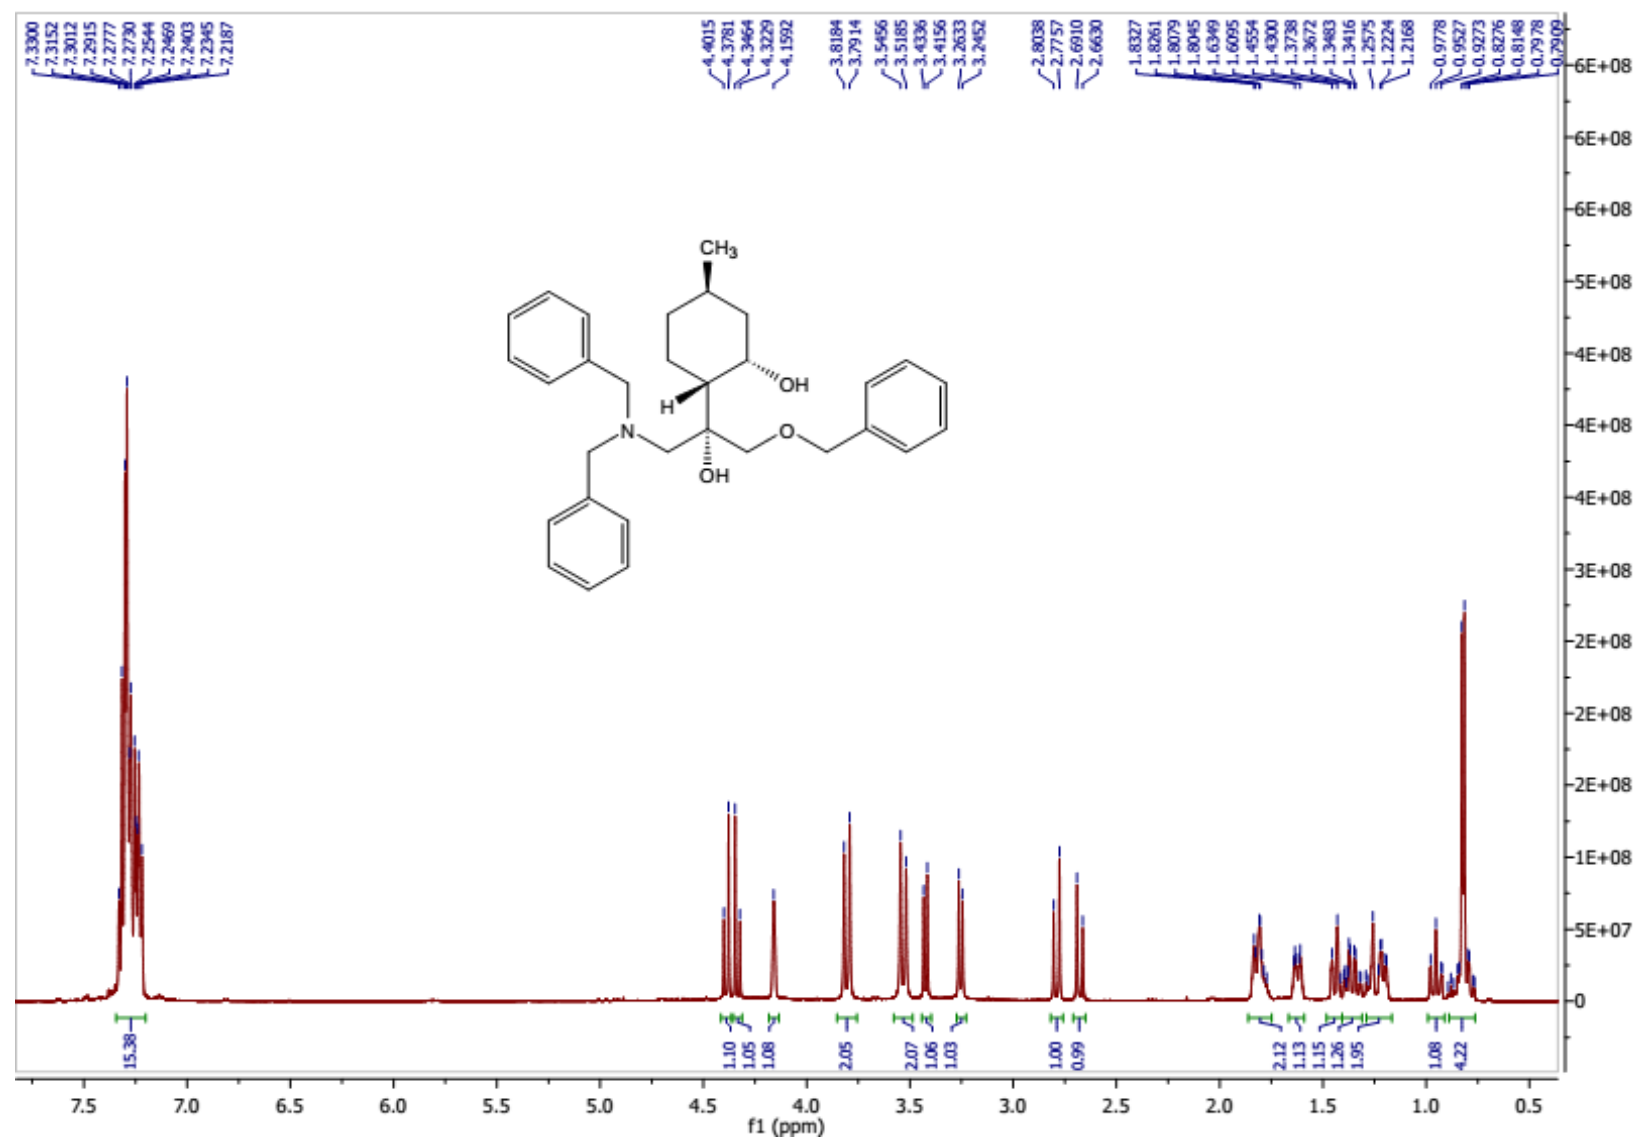

Figure S 75:  $^{13}\text{C}$ -NMR of compound **26a**

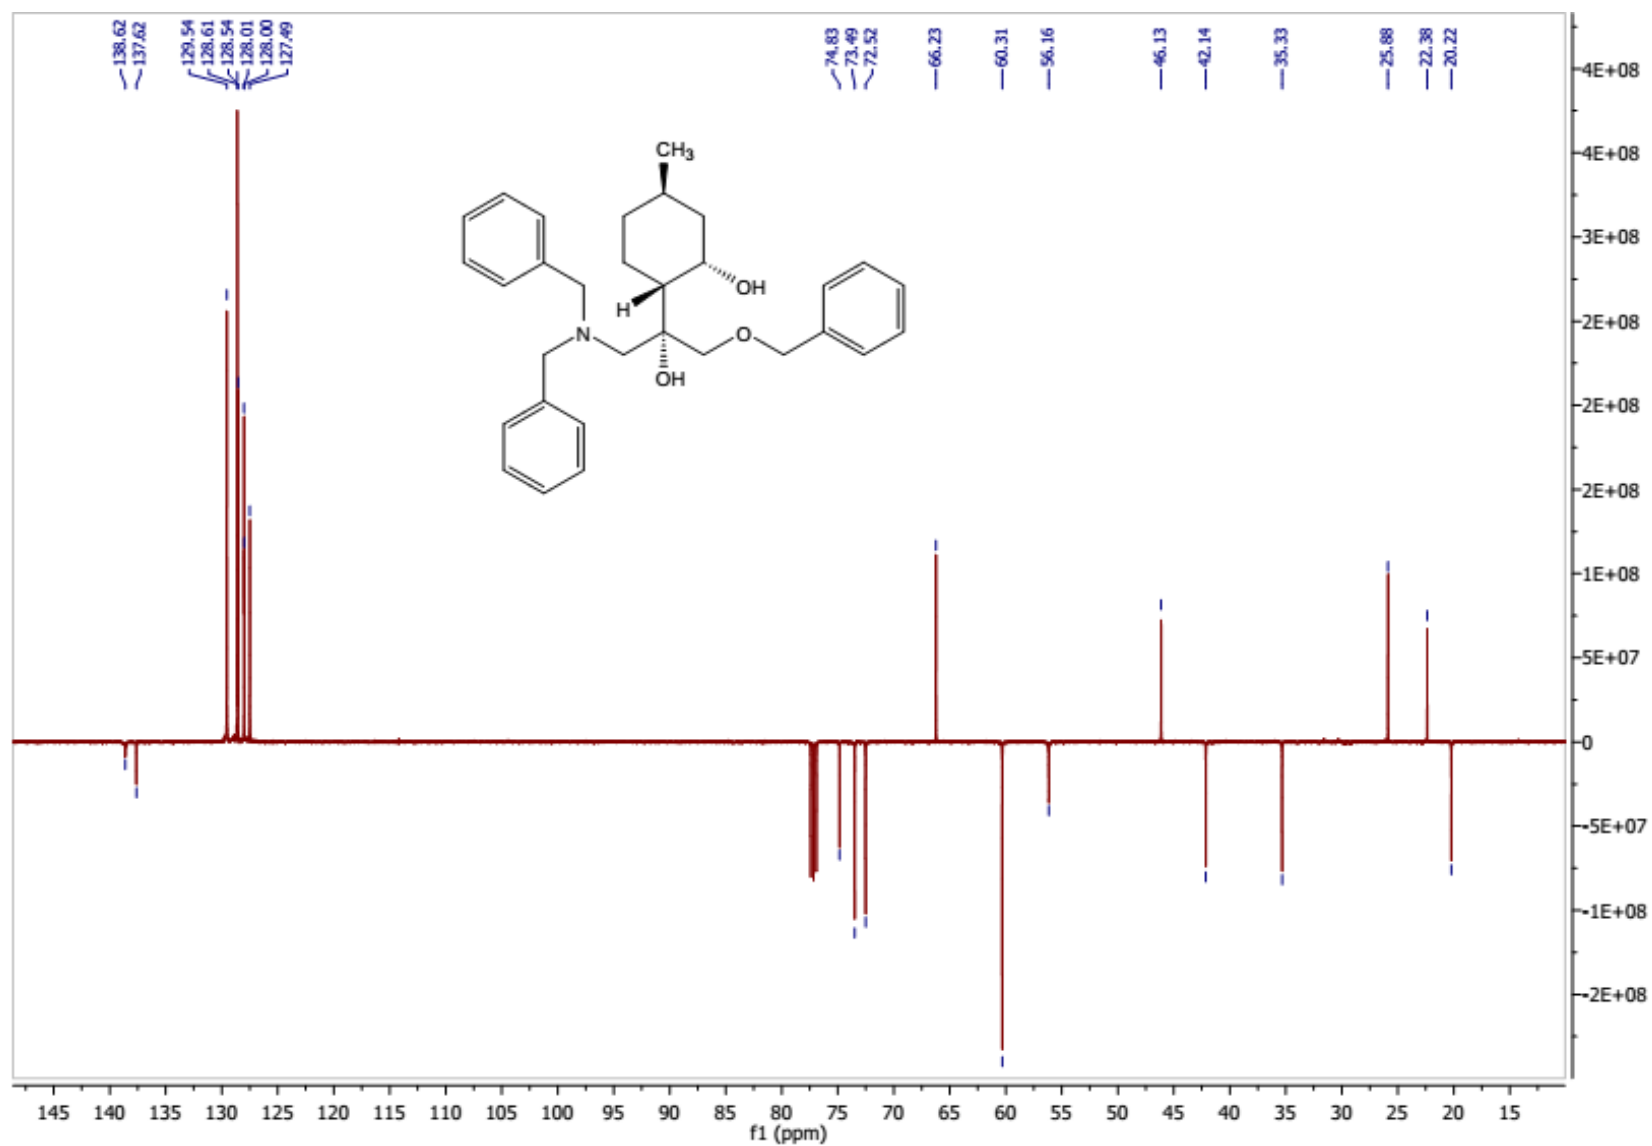

Figure S 76:  $^1\text{H}$ -NMR of compound **26b**

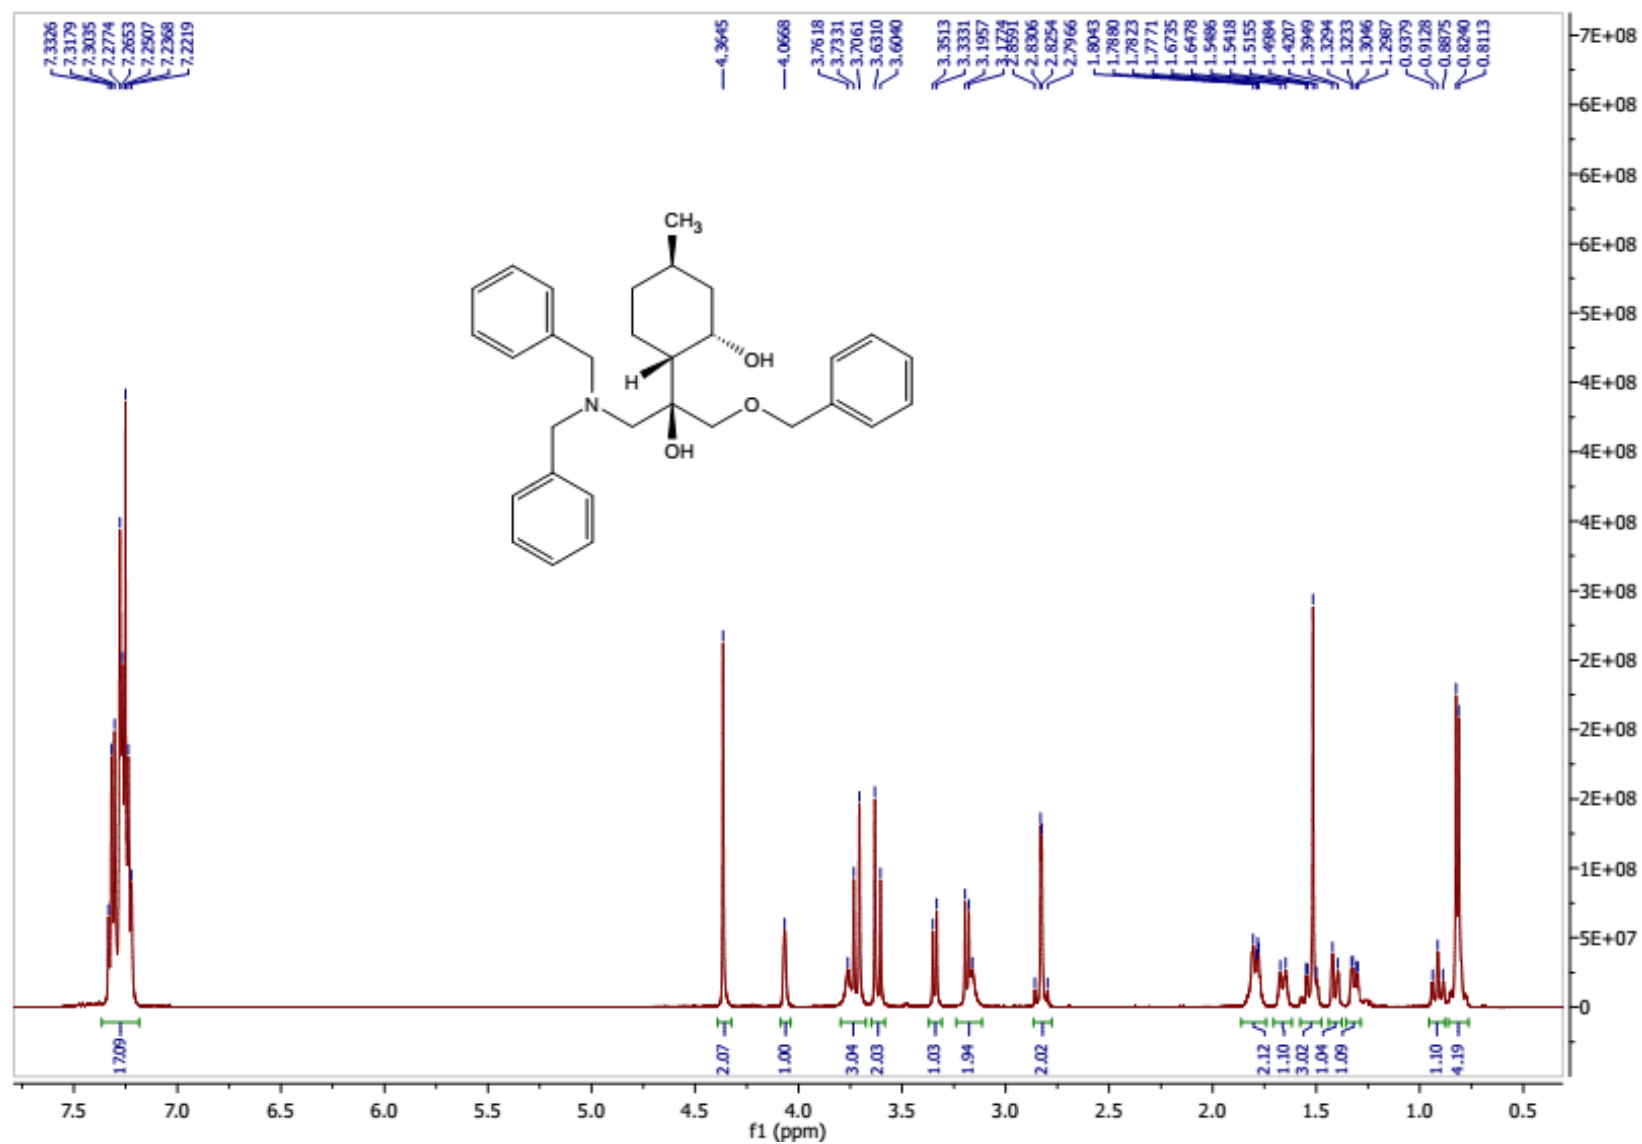

Figure S 77:  $^{13}\text{C}$ -NMR of compound **26b**

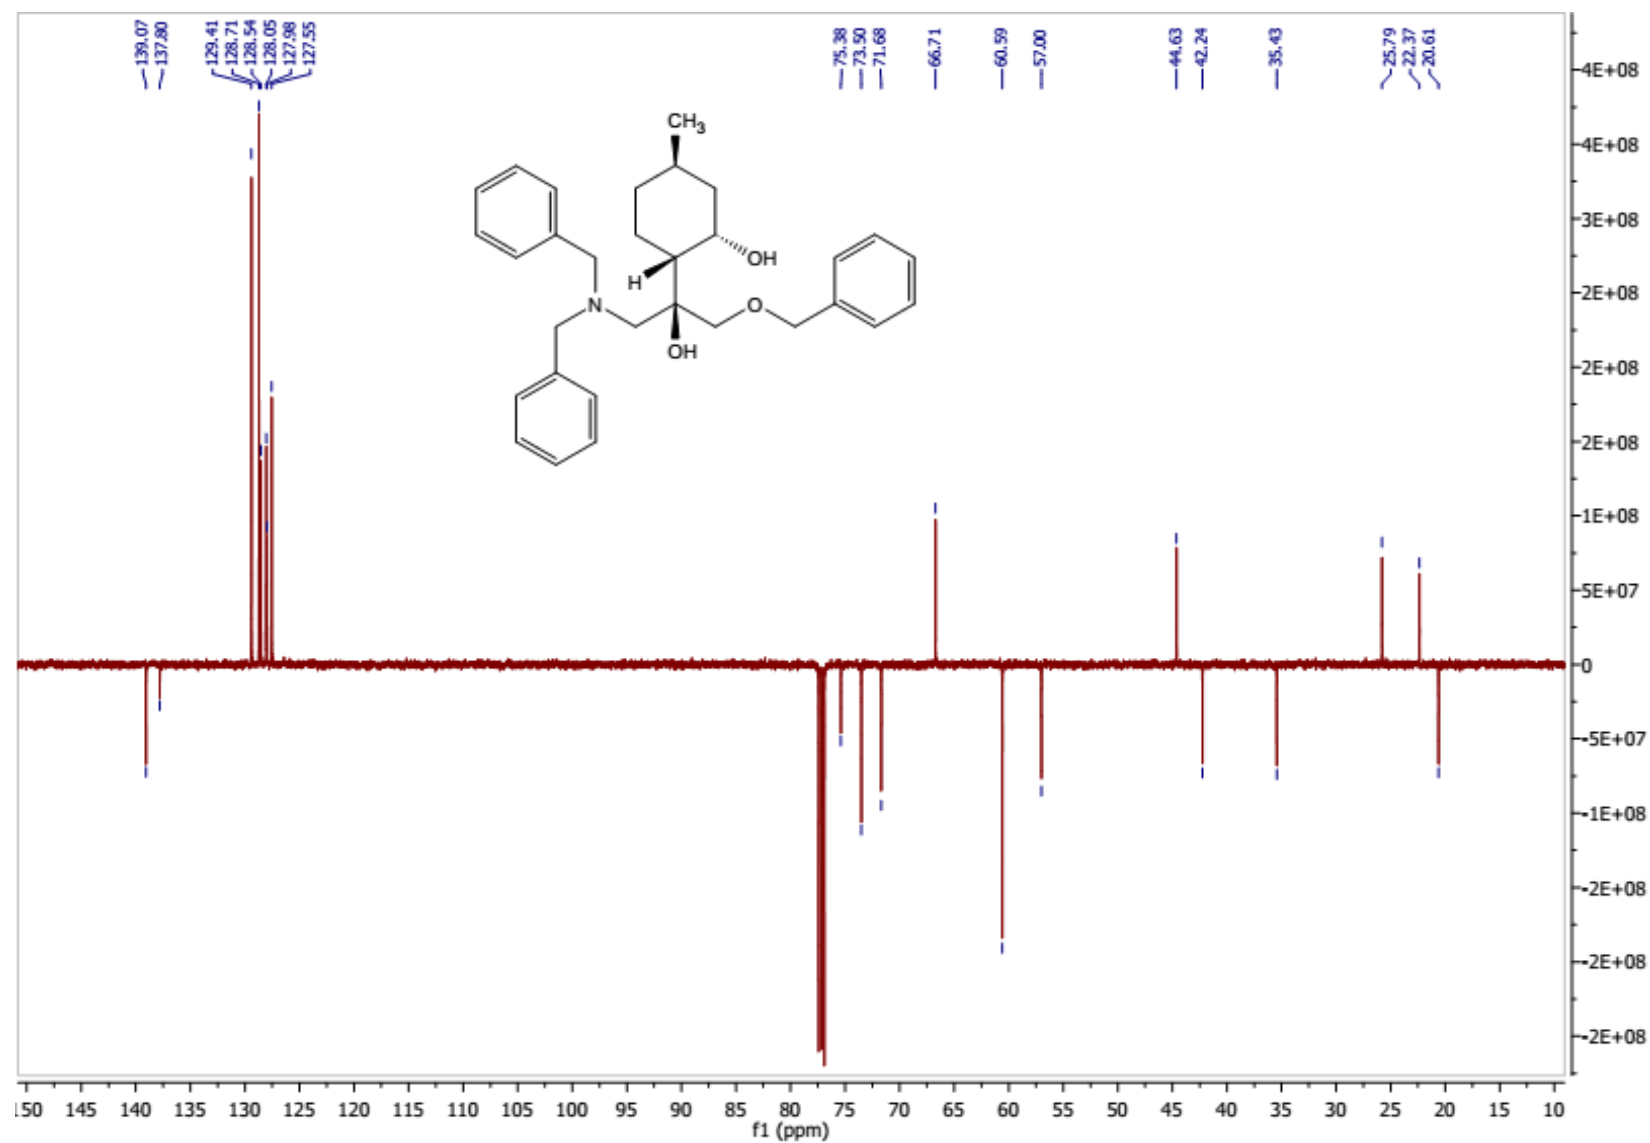

Figure S 78:  $^1\text{H}$ -NMR of compound **27a**

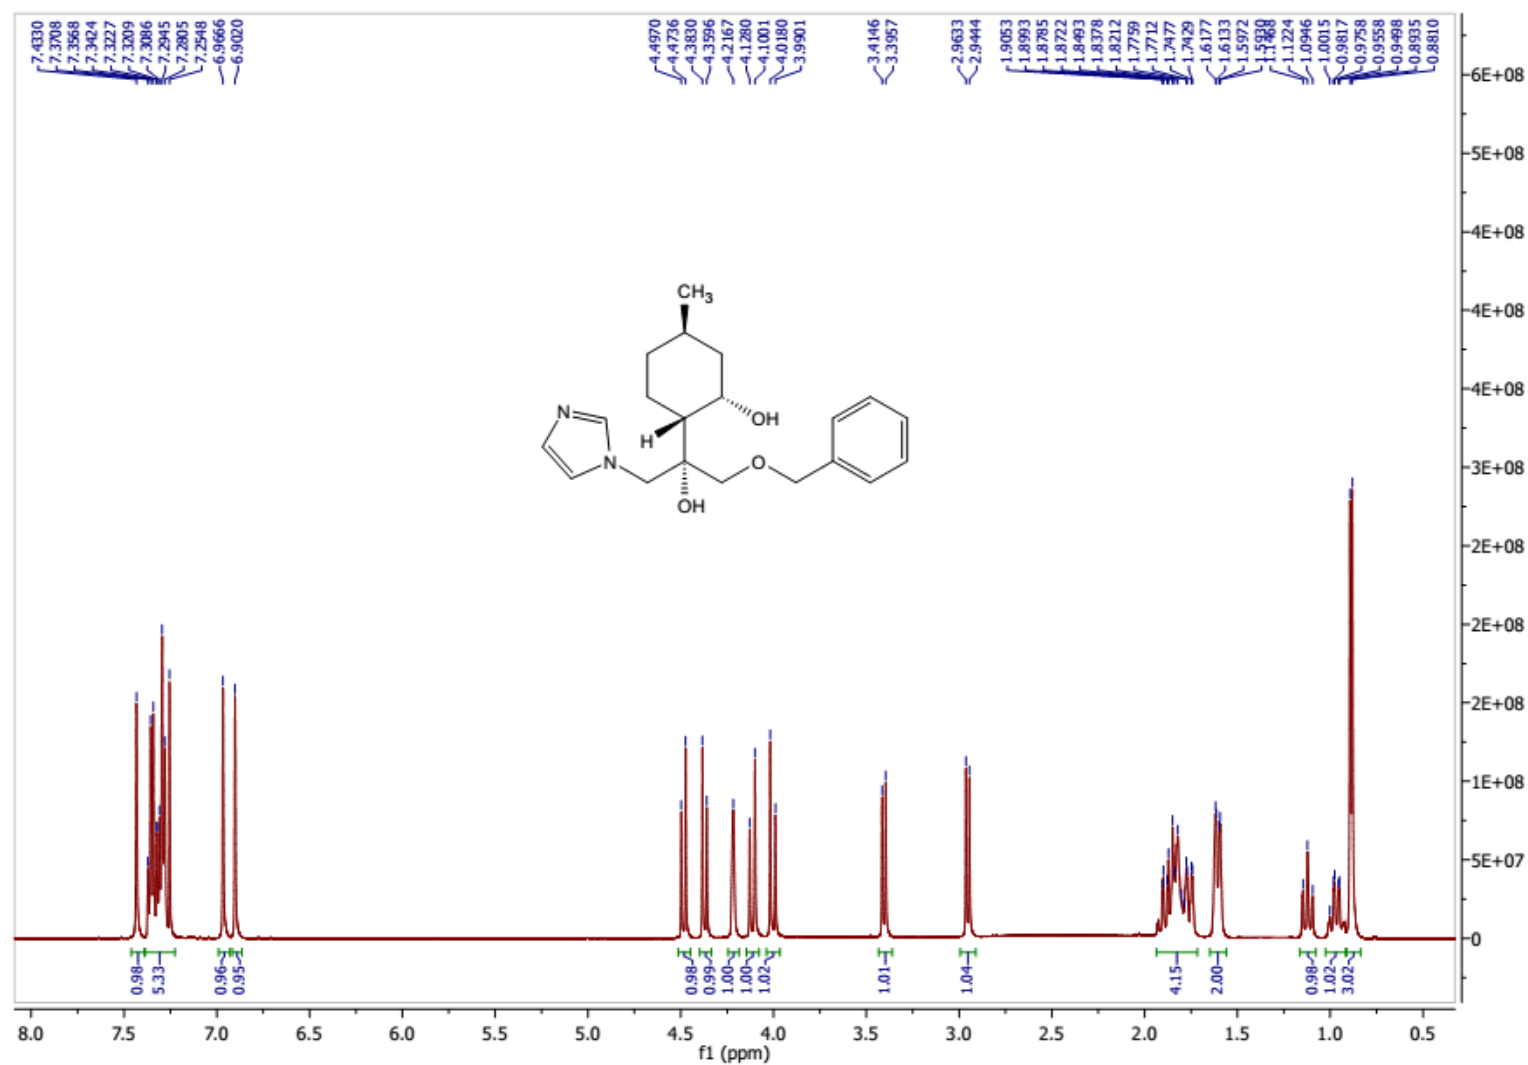

Figure S 79:  $^{13}\text{C}$ -NMR of compound **27a**

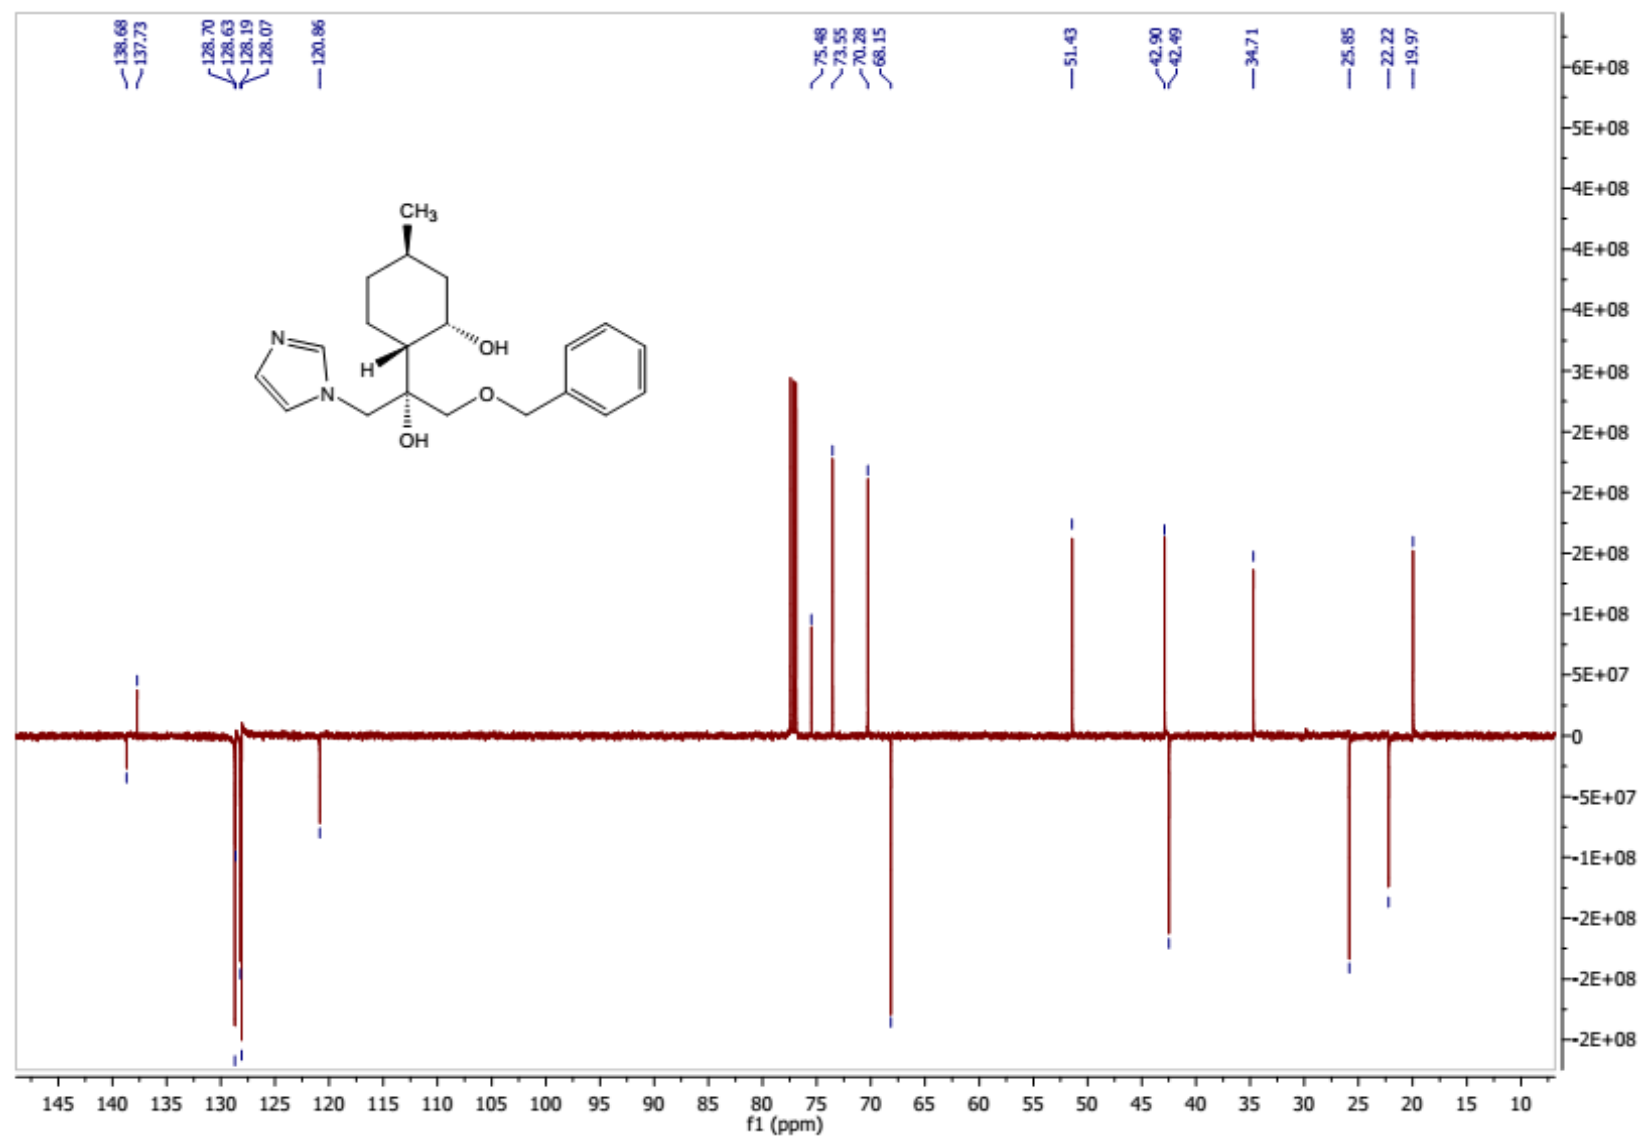

Figure S 80:  $^1\text{H}$ -NMR of compound **27b**

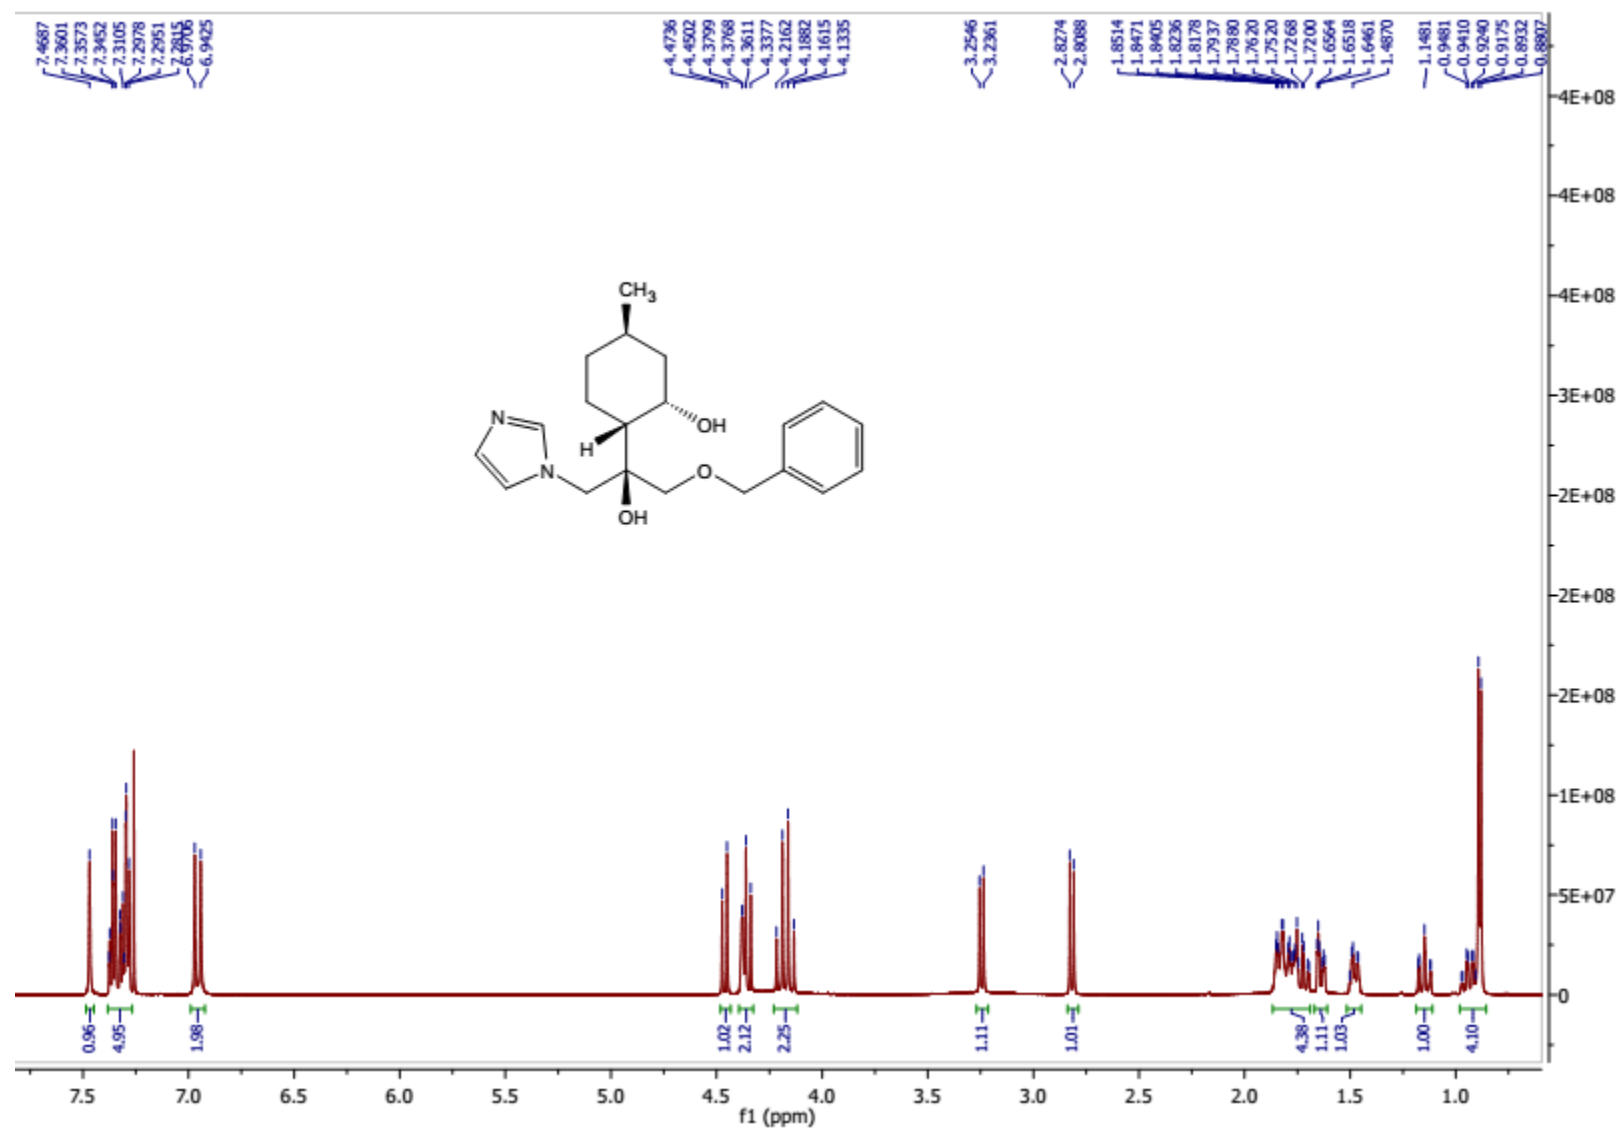

Figure S 81:  $^{13}\text{C}$ -NMR of compound **27b**

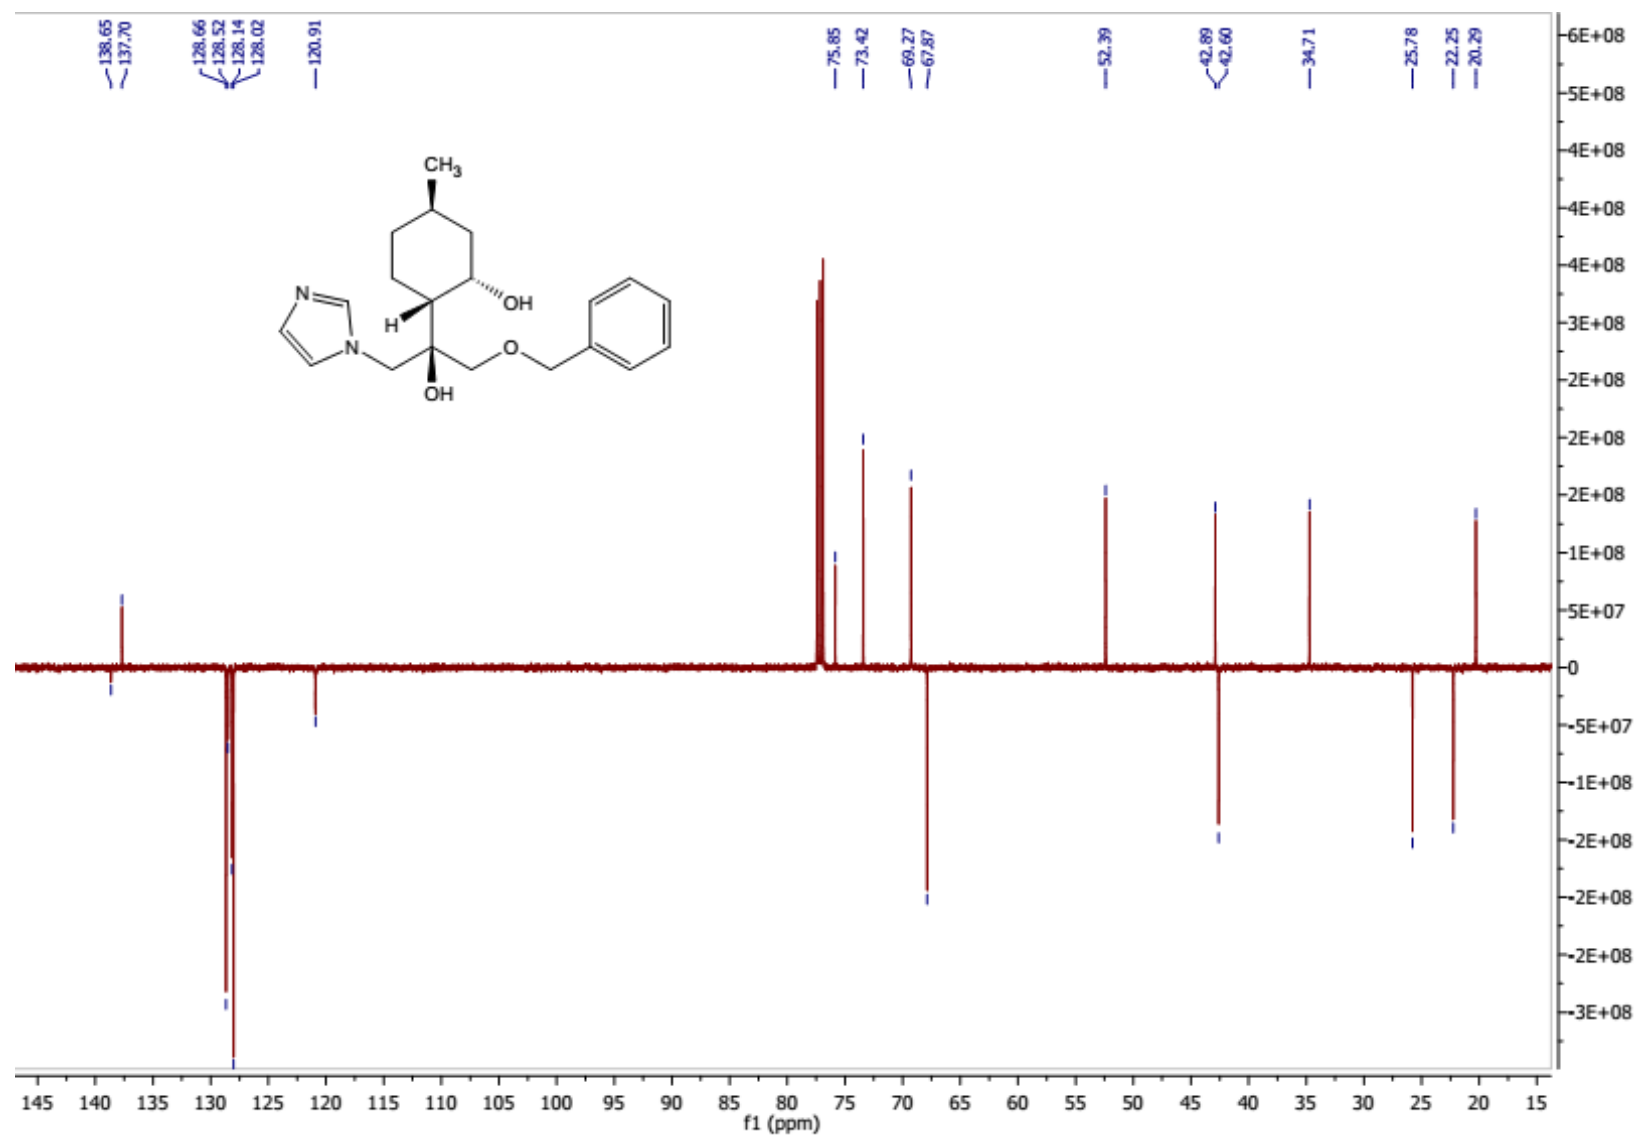



Figure S 82:  $^1\text{H}$ -NMR of compound **28a**

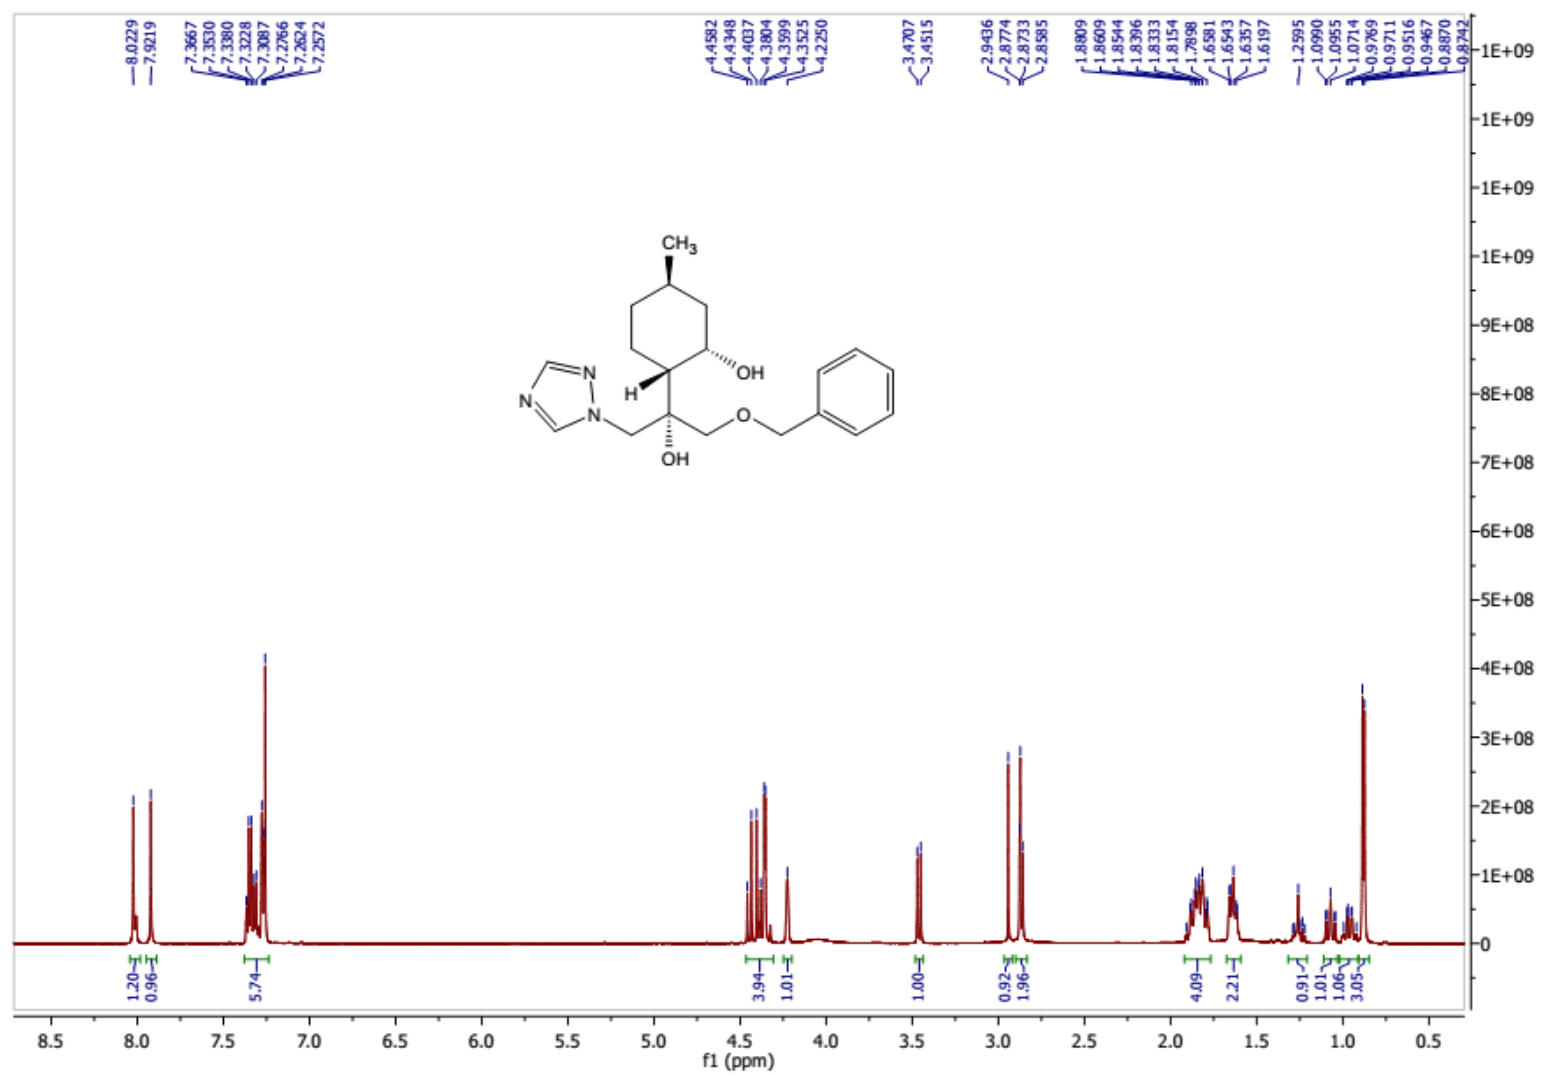

Figure S 83:  $^{13}\text{C}$ -NMR of compound **28a**

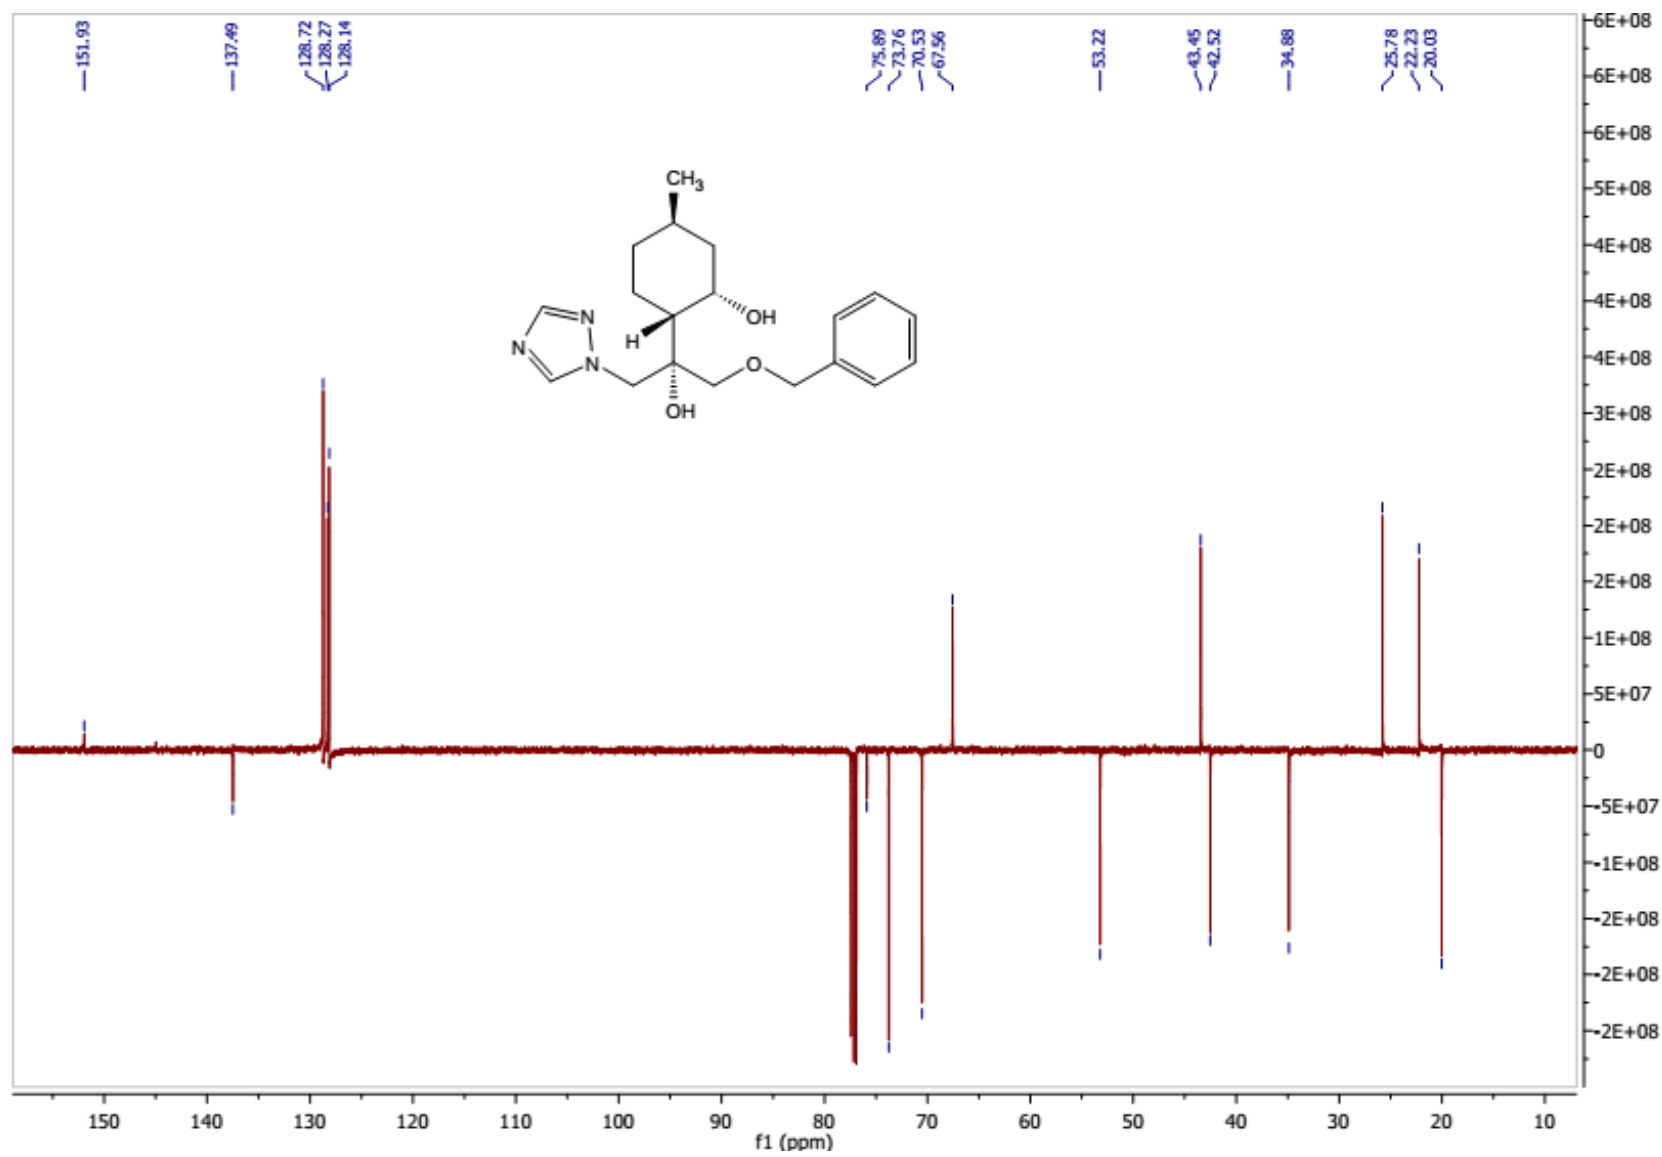

Figure S 84:  $^1\text{H}$ -NMR of compound **28b**

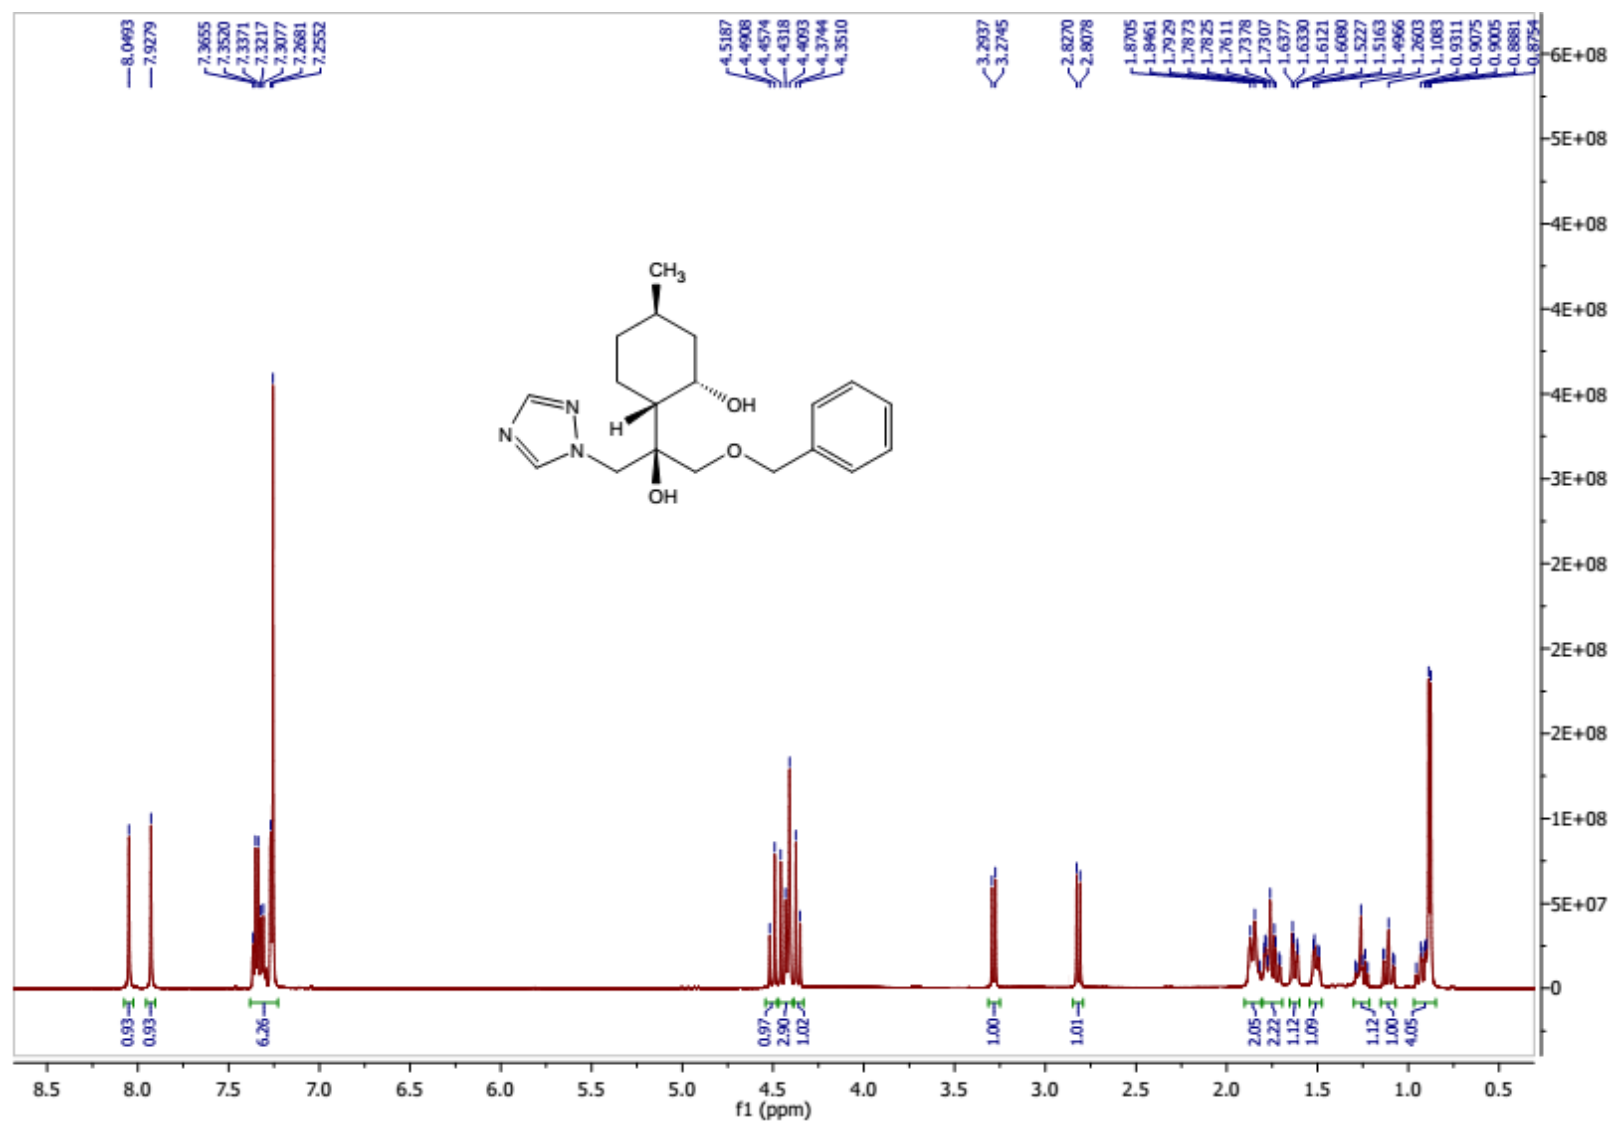

Figure S 85:  $^{13}\text{C}$ -NMR of compound **28b**

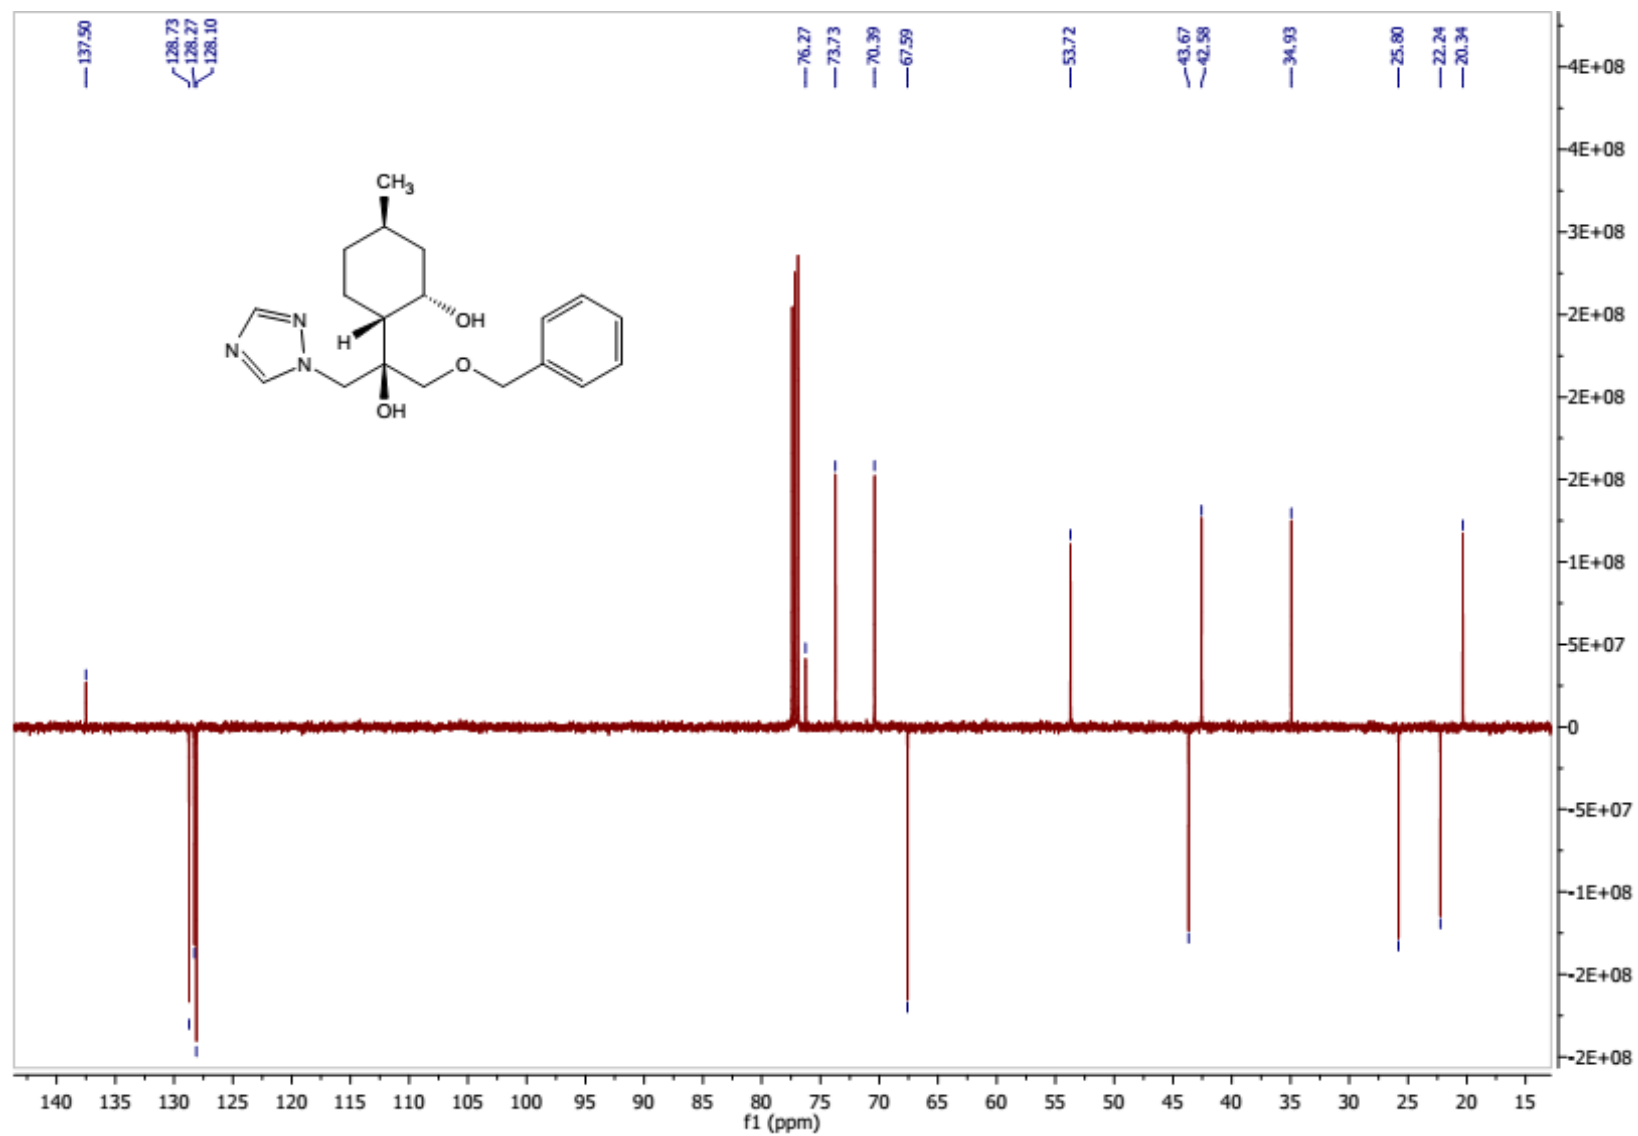

Figure S 86:  $^1\text{H}$ -NMR of compound **30b**

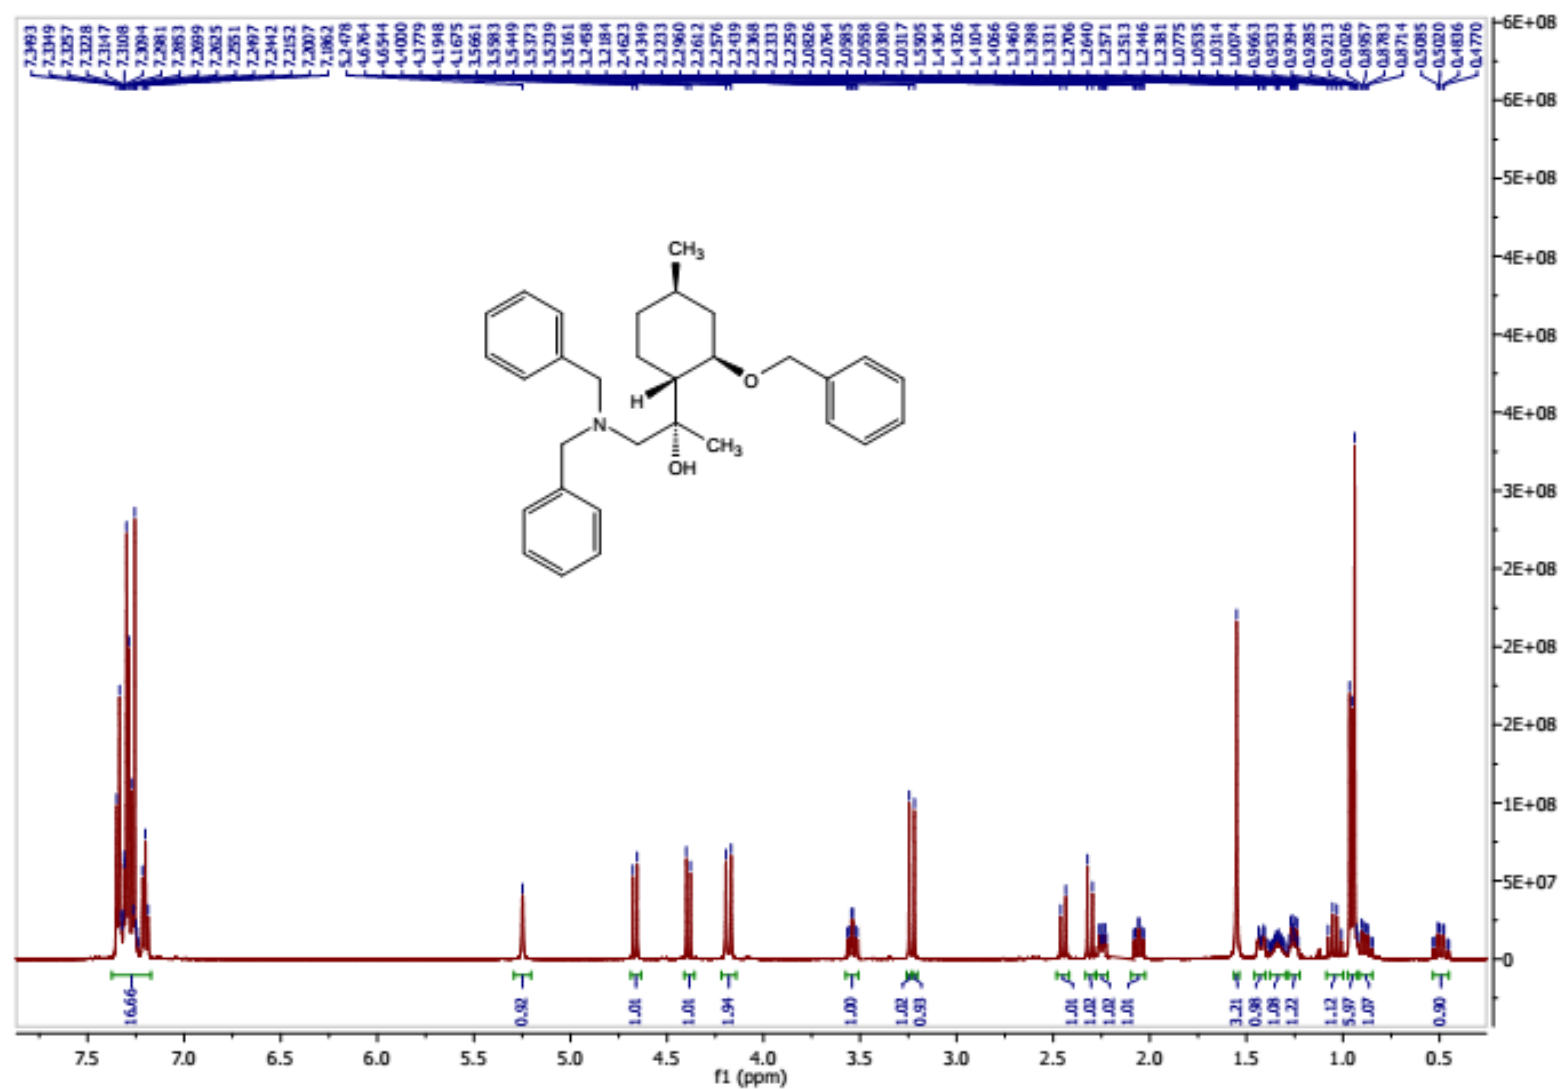

Figure S 87:  $^{13}\text{C}$ -NMR of compound **30b**

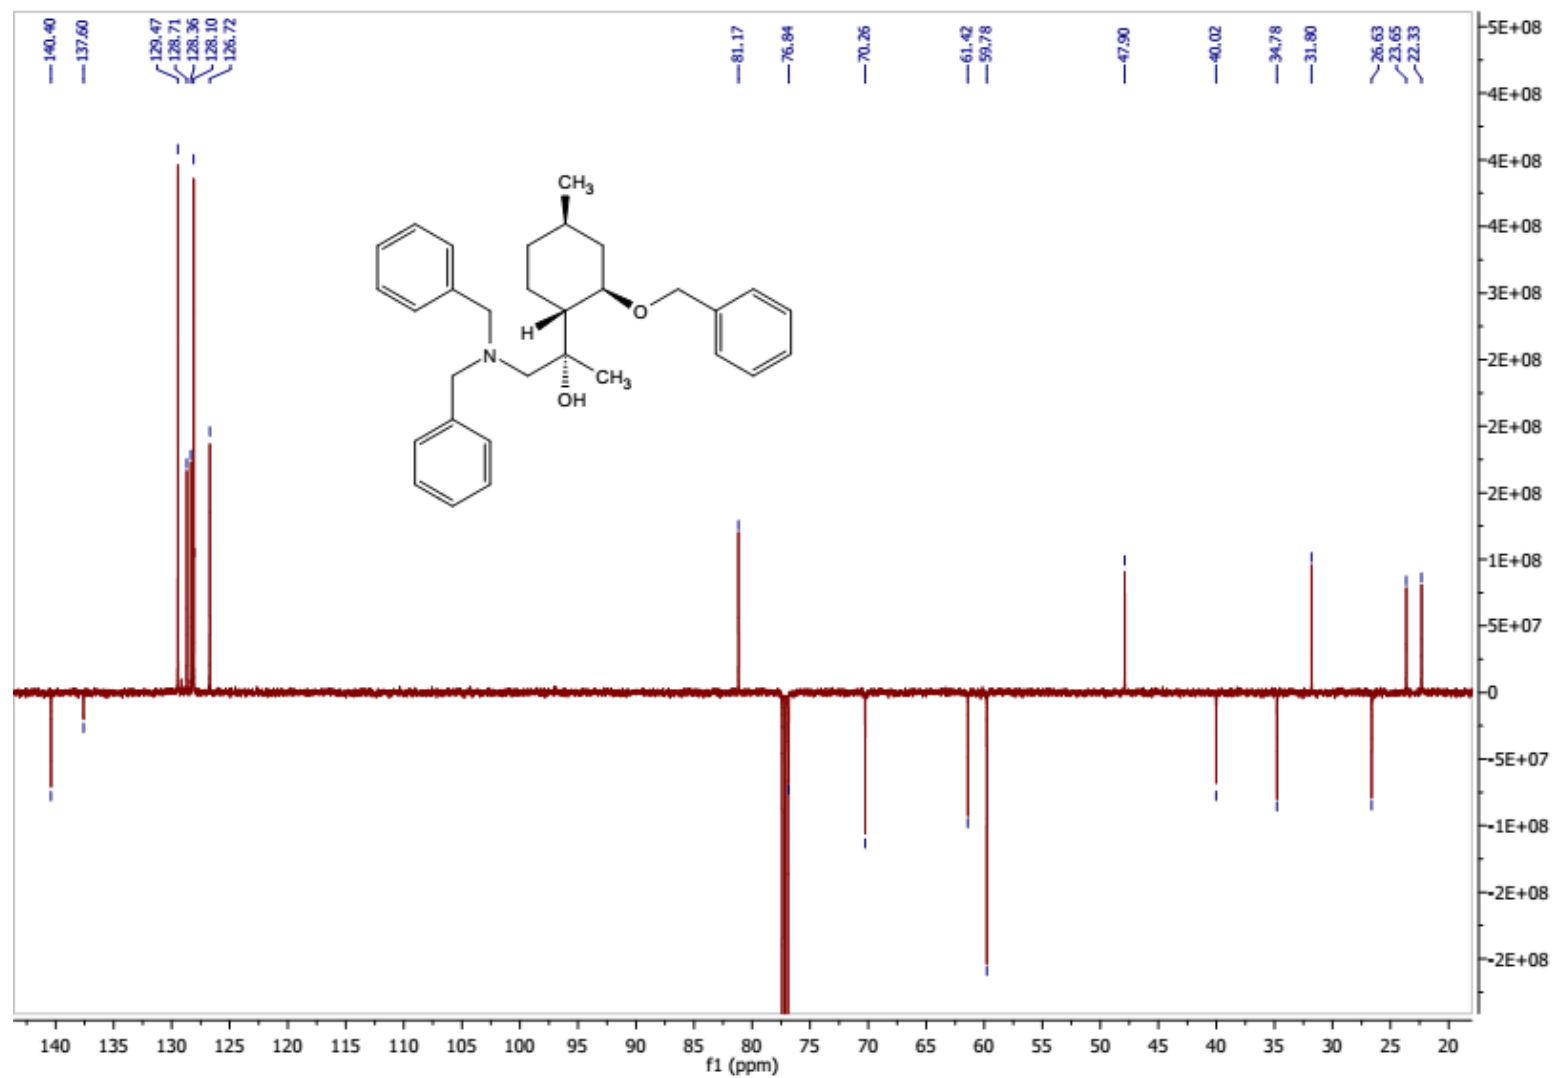

Figure S 88:  $^1\text{H}$ -NMR of compound **31a**

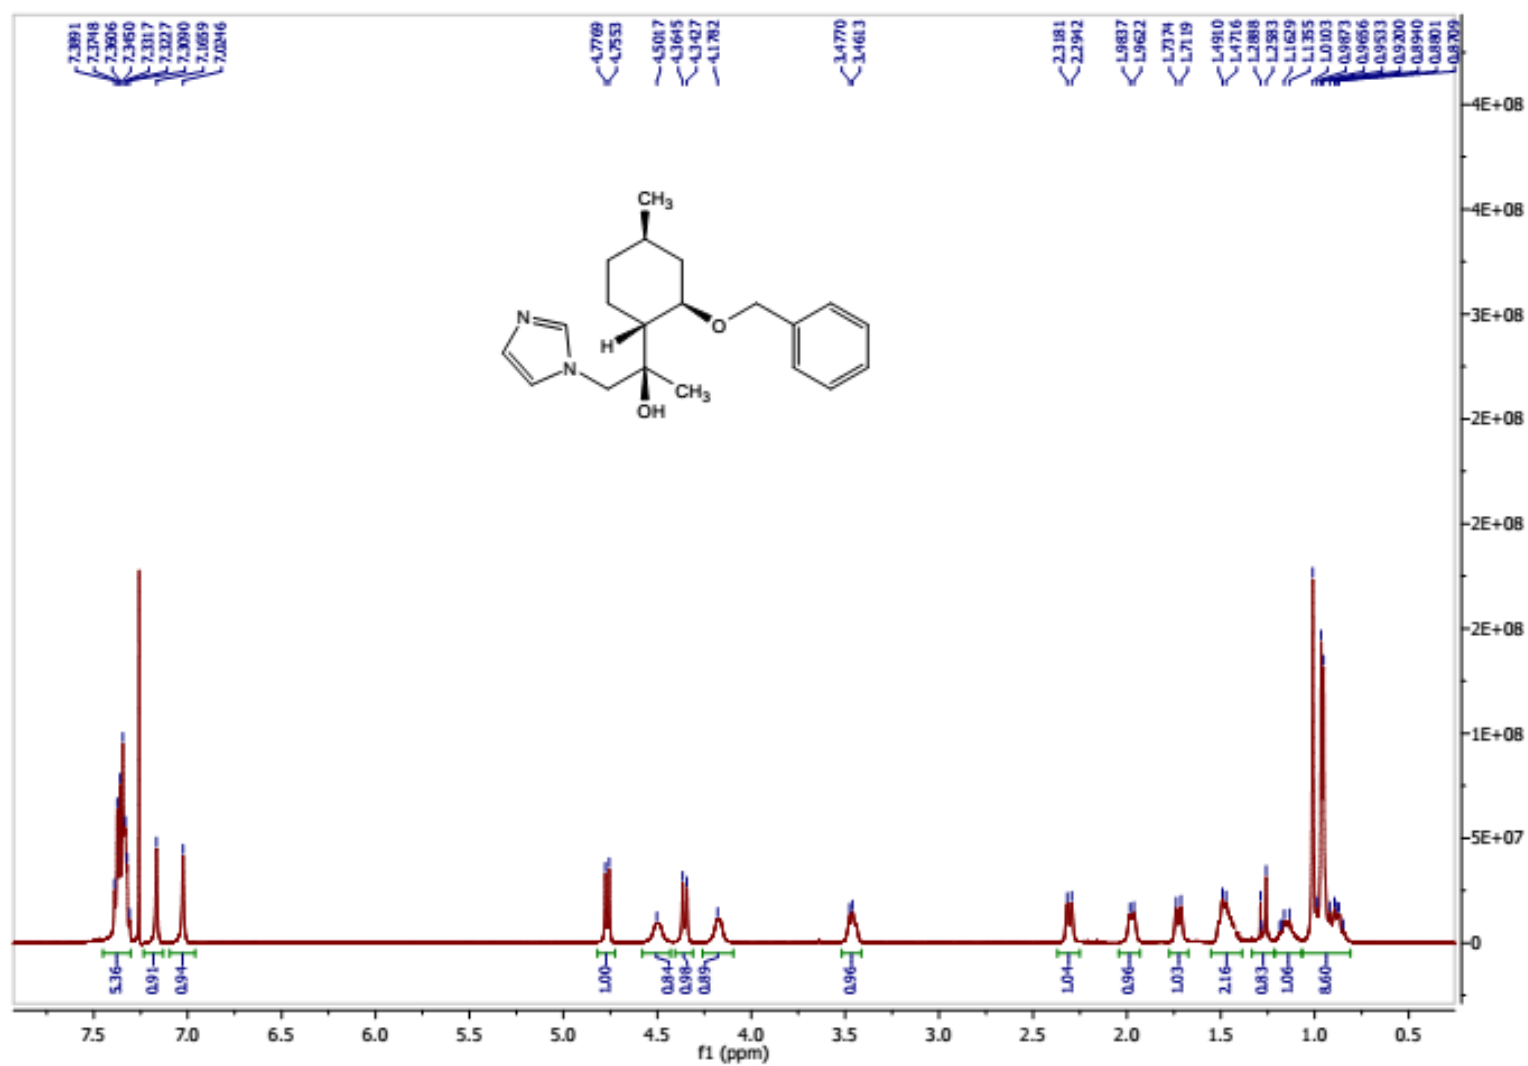

Figure S 89:  $^{13}\text{C}$ -NMR of compound **31a**

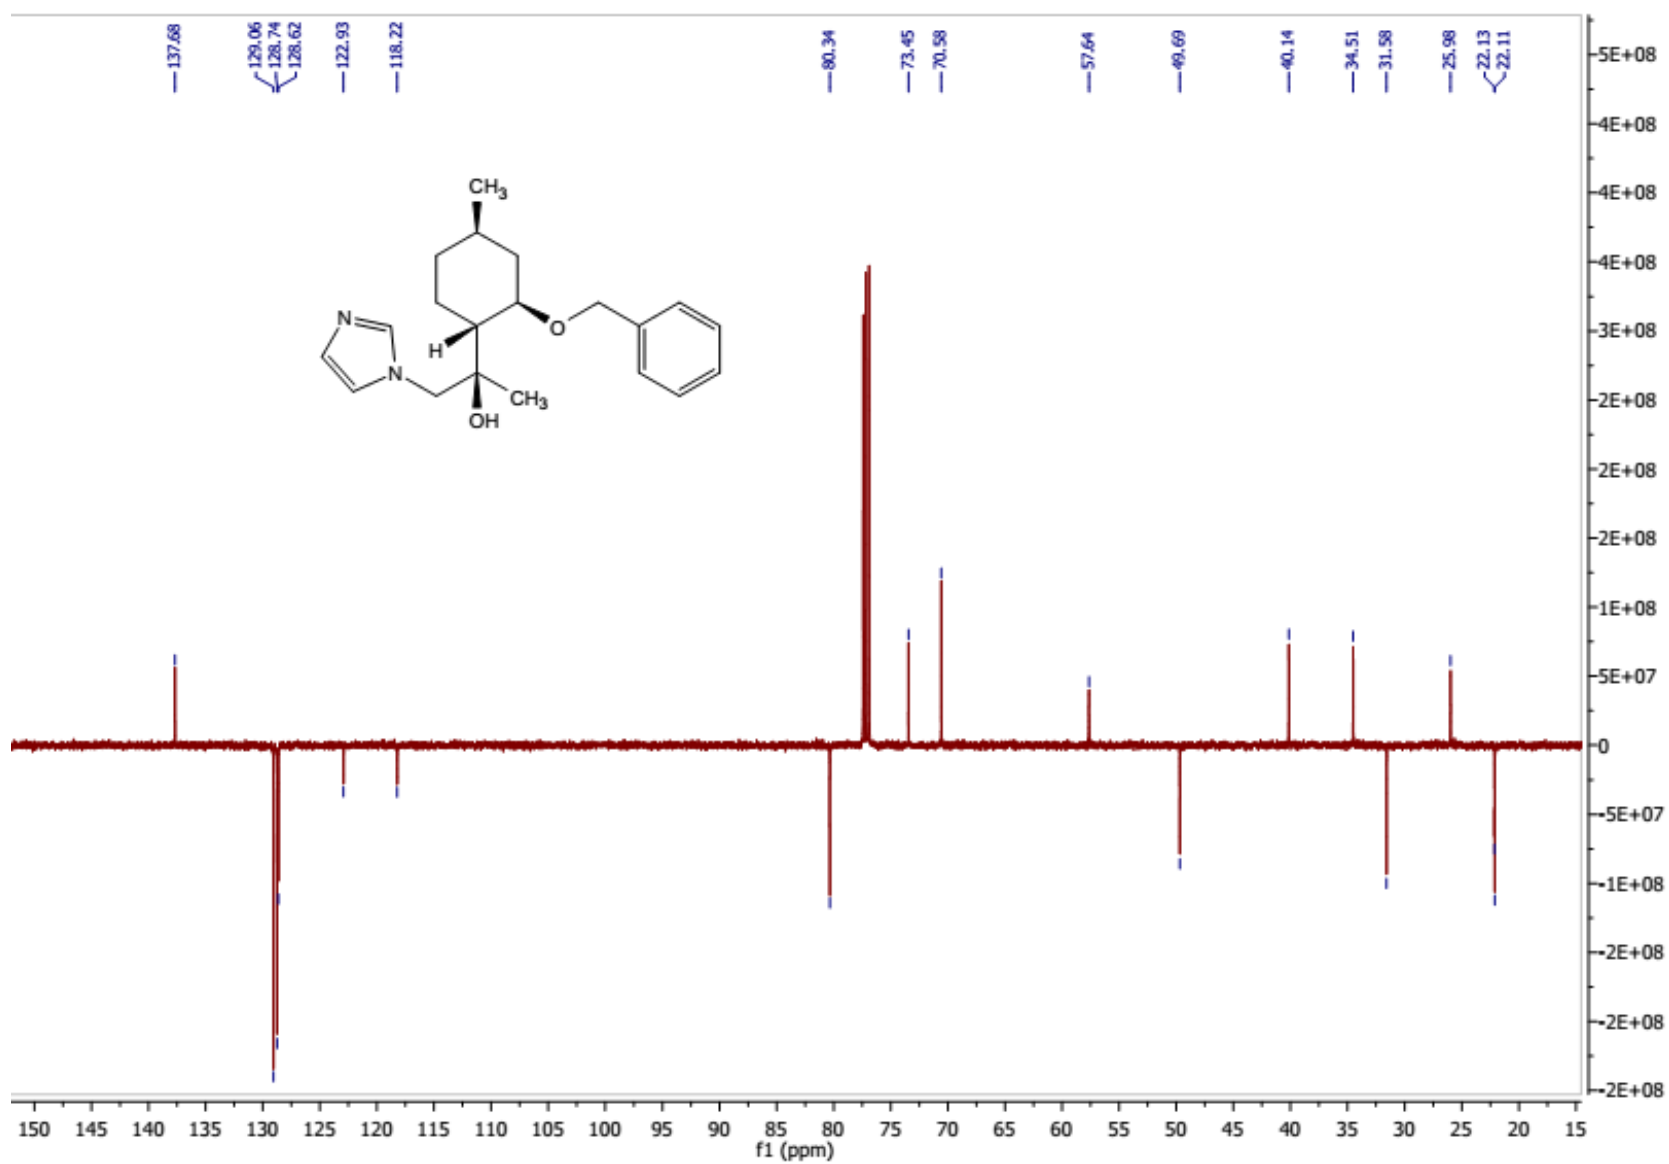



Figure S 90:  $^1\text{H}$ -NMR of compound **31b**

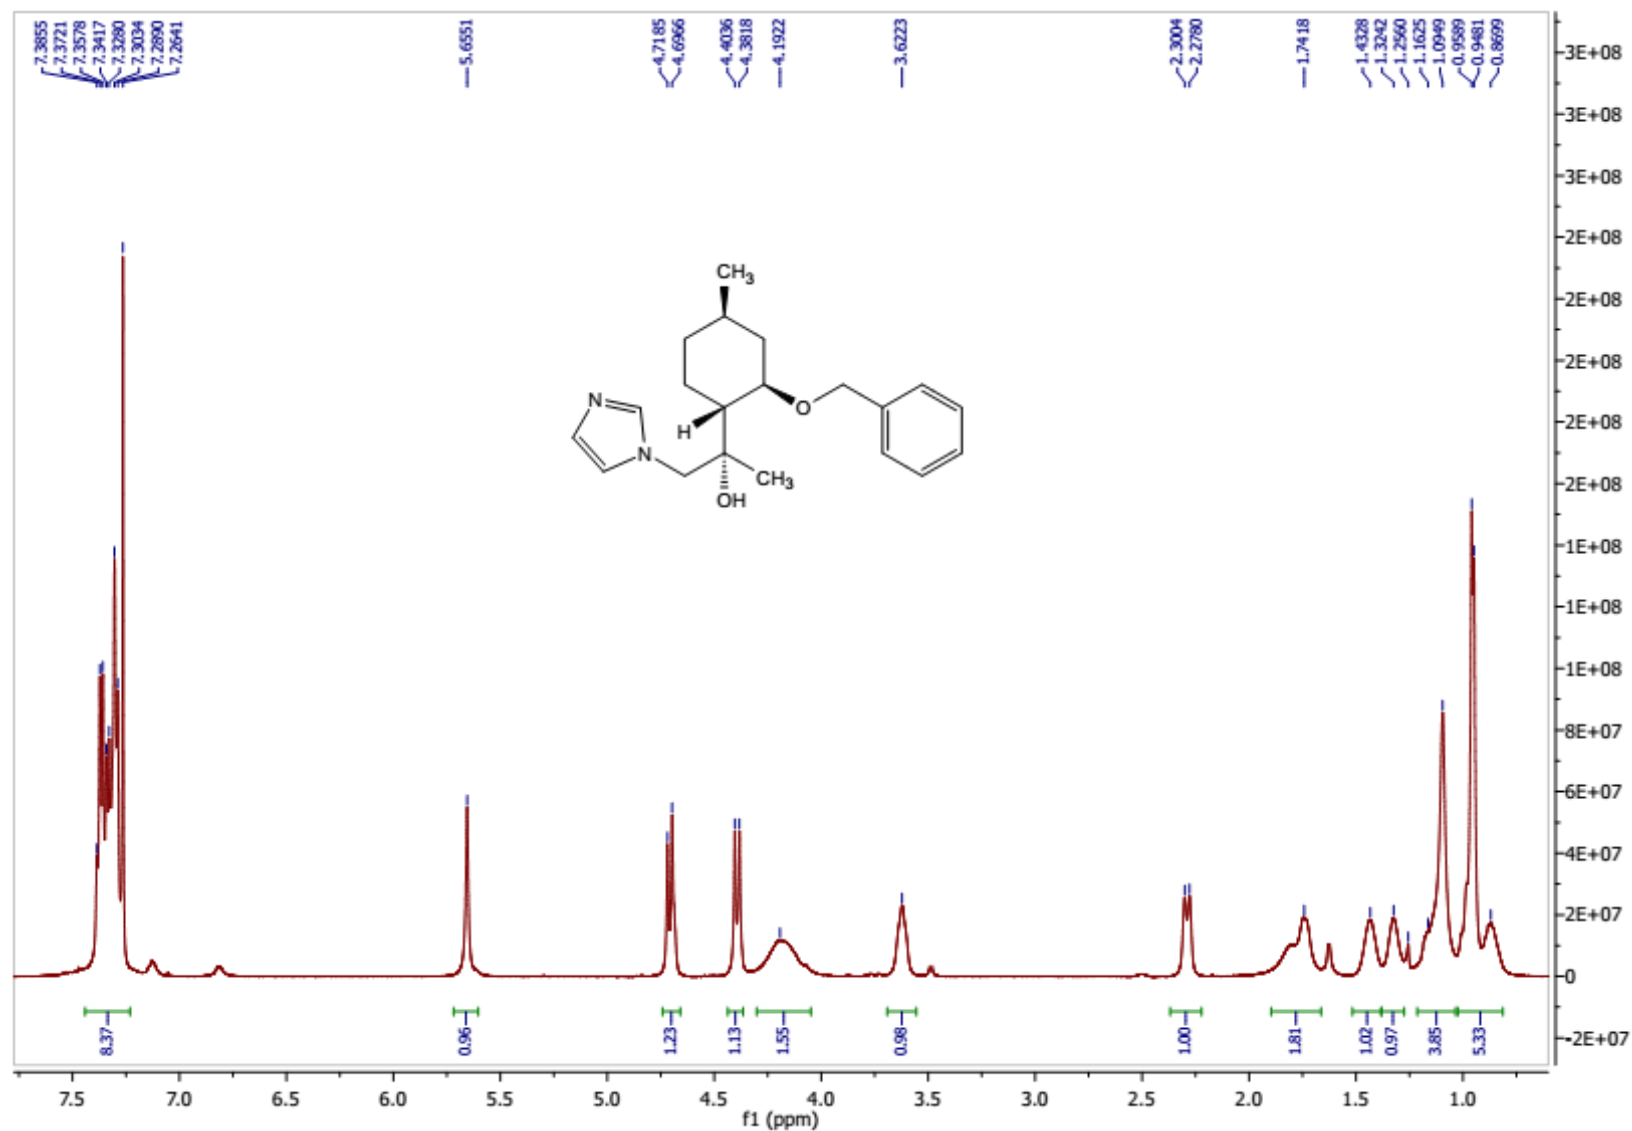

Figure S 91:  $^{13}\text{C}$ -NMR of compound **31b**

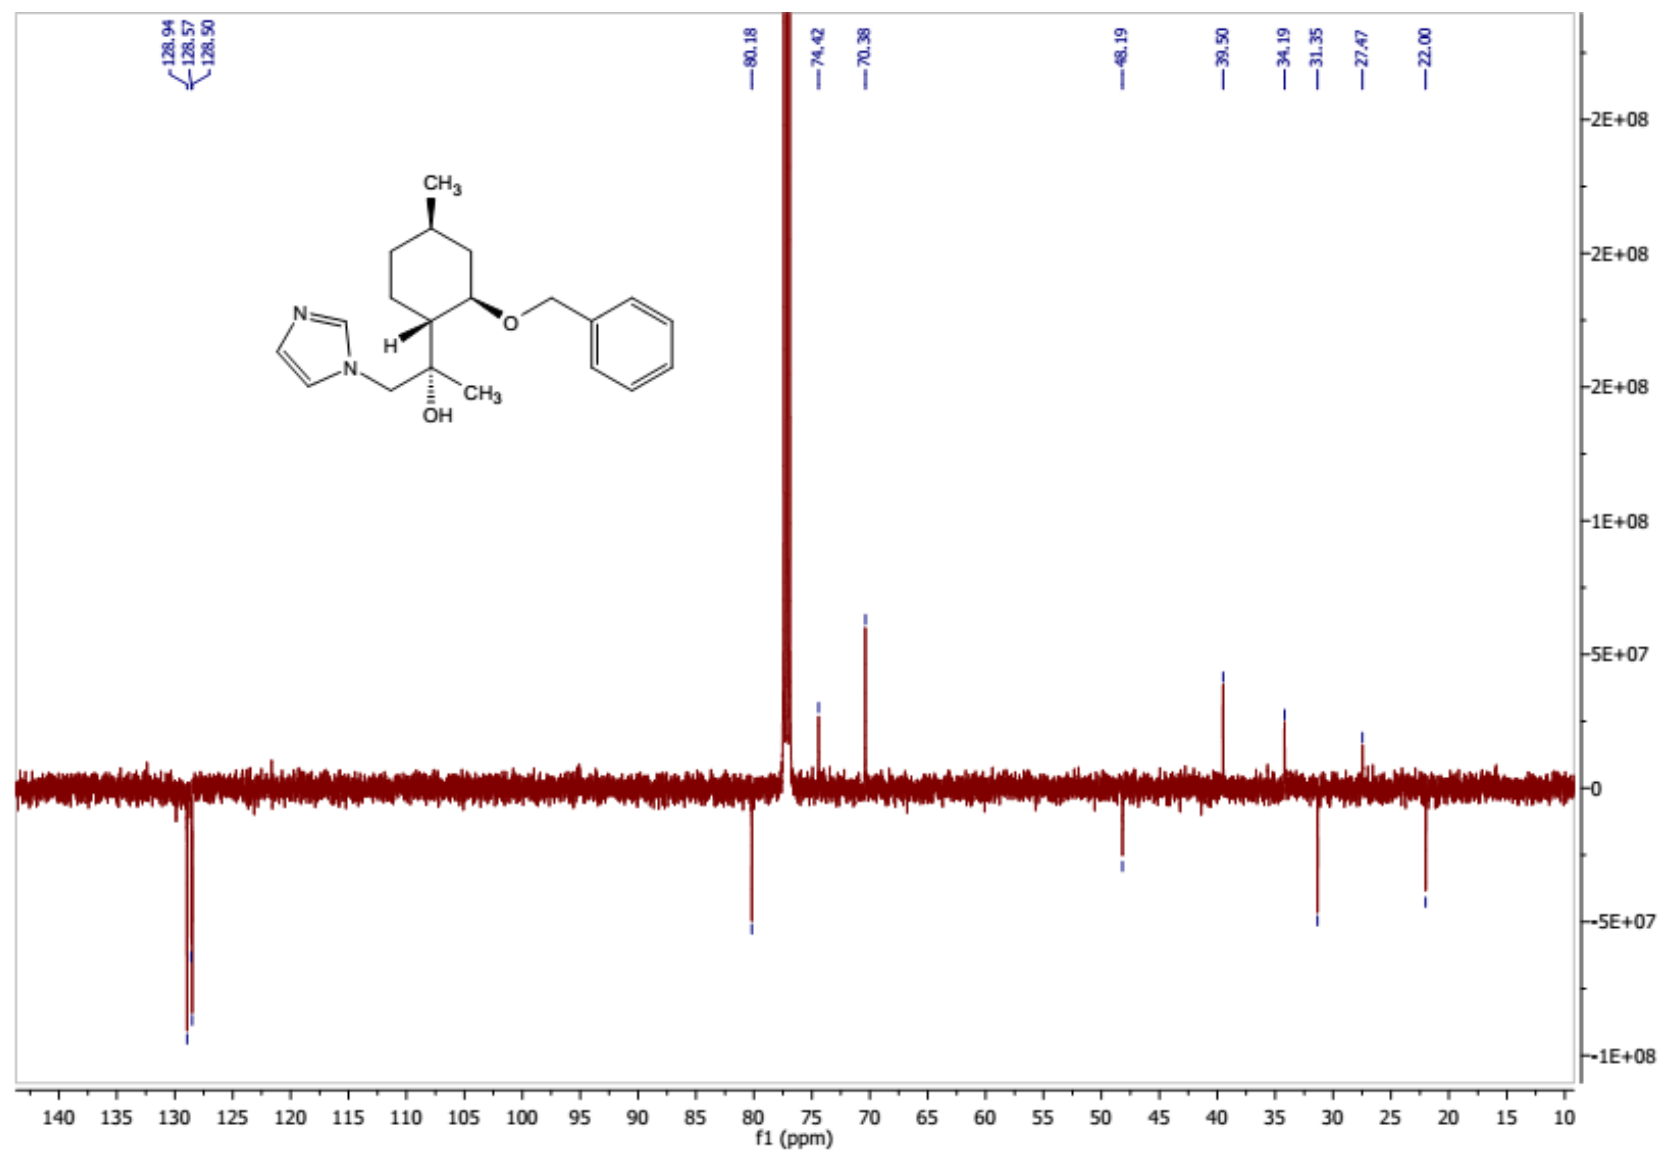

Figure S 92:  $^1\text{H}$ -NMR of compound **32a**

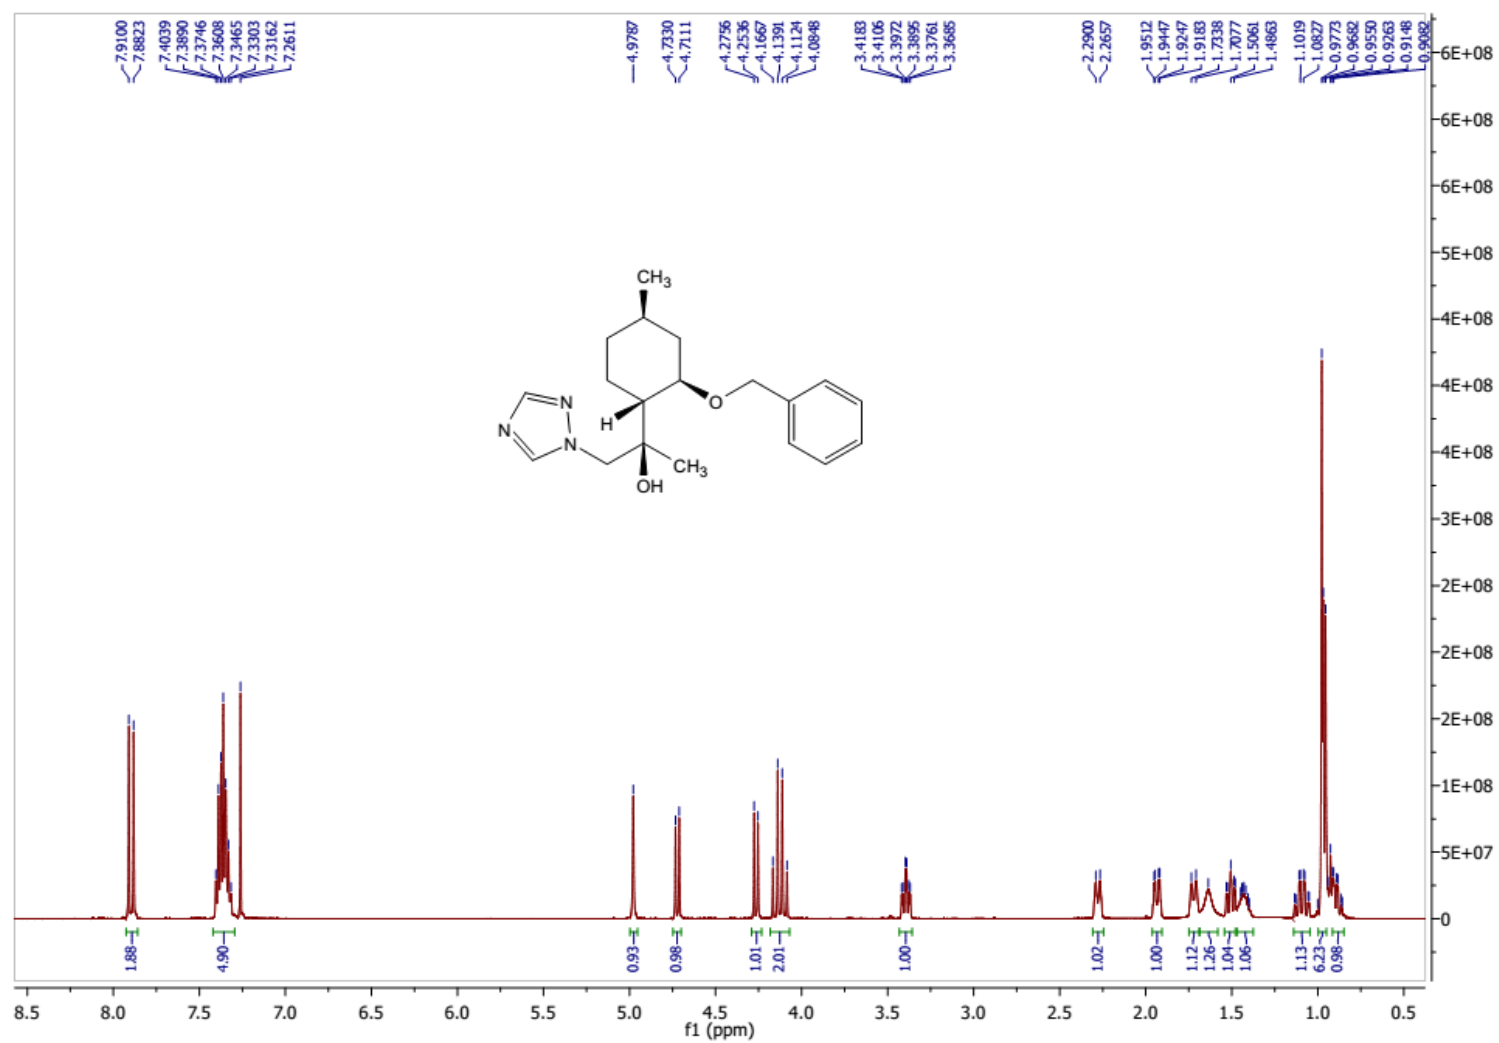

Figure S 93:  $^{13}\text{C}$ -NMR of compound **32a**

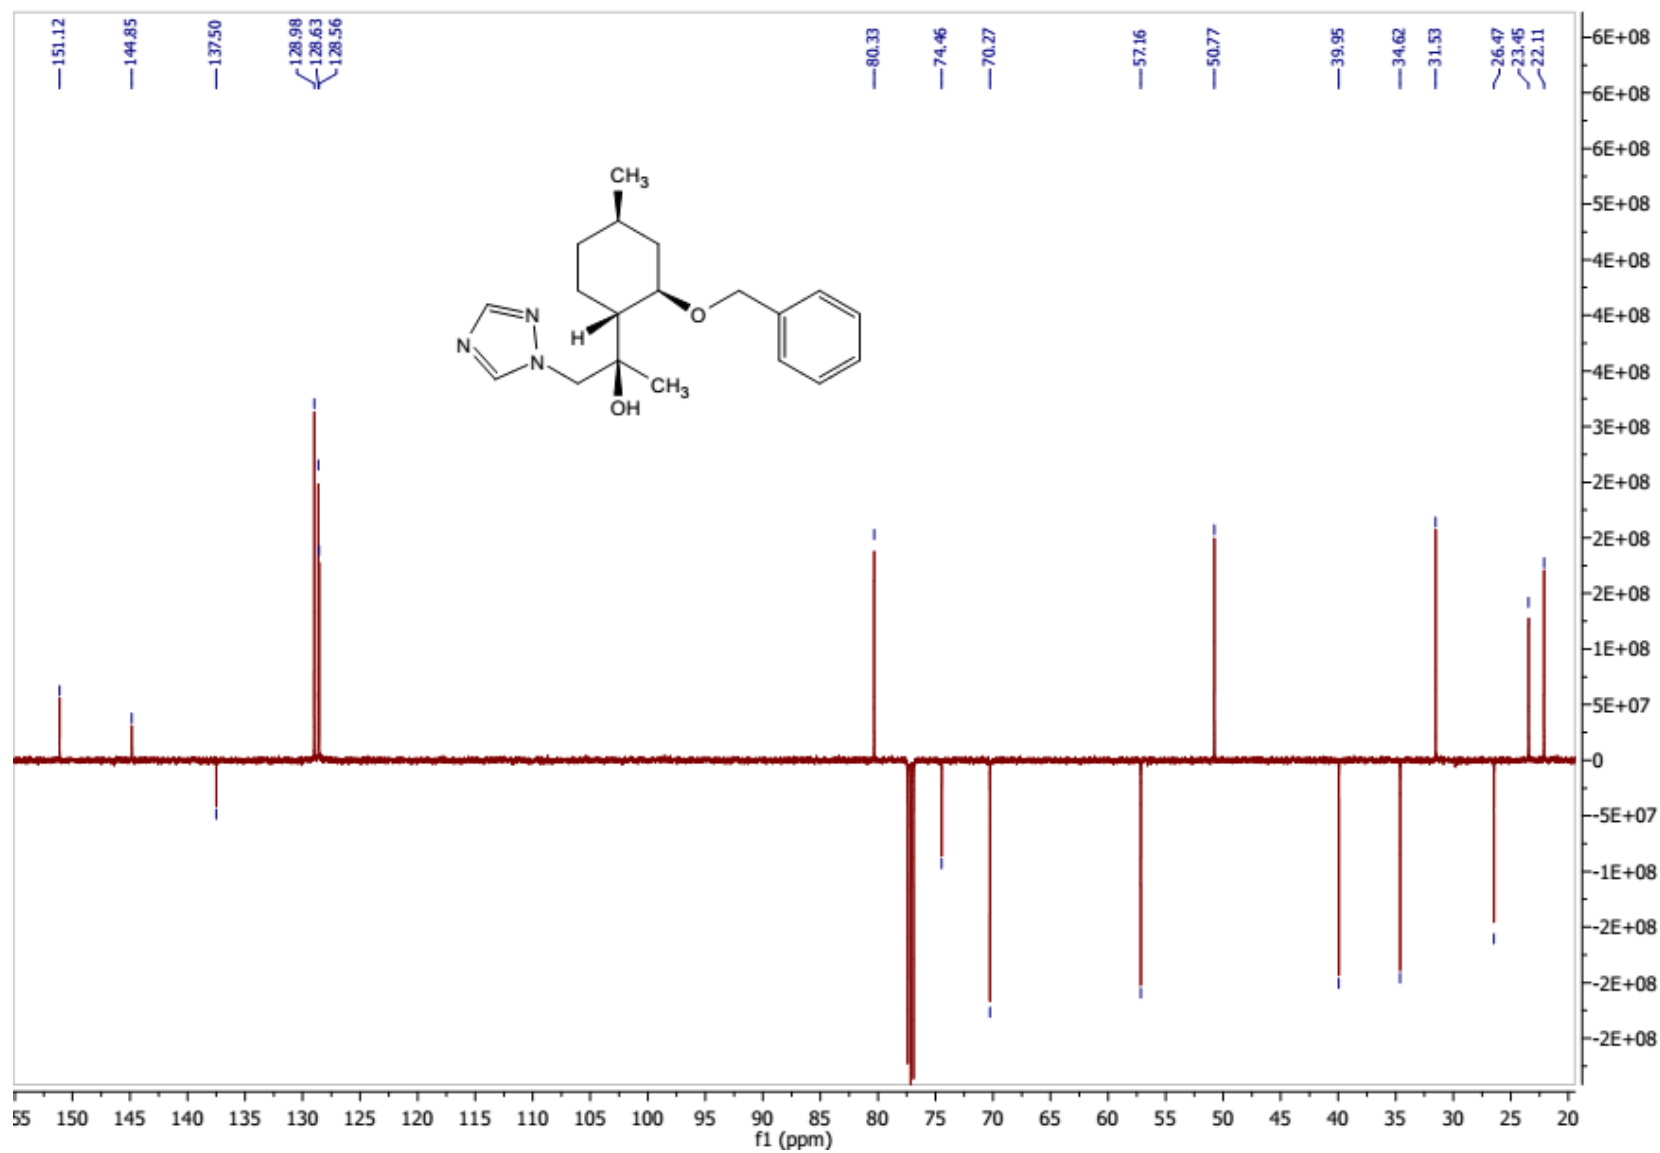

Figure S 94:  $^1\text{H}$ -NMR of compound **32b**

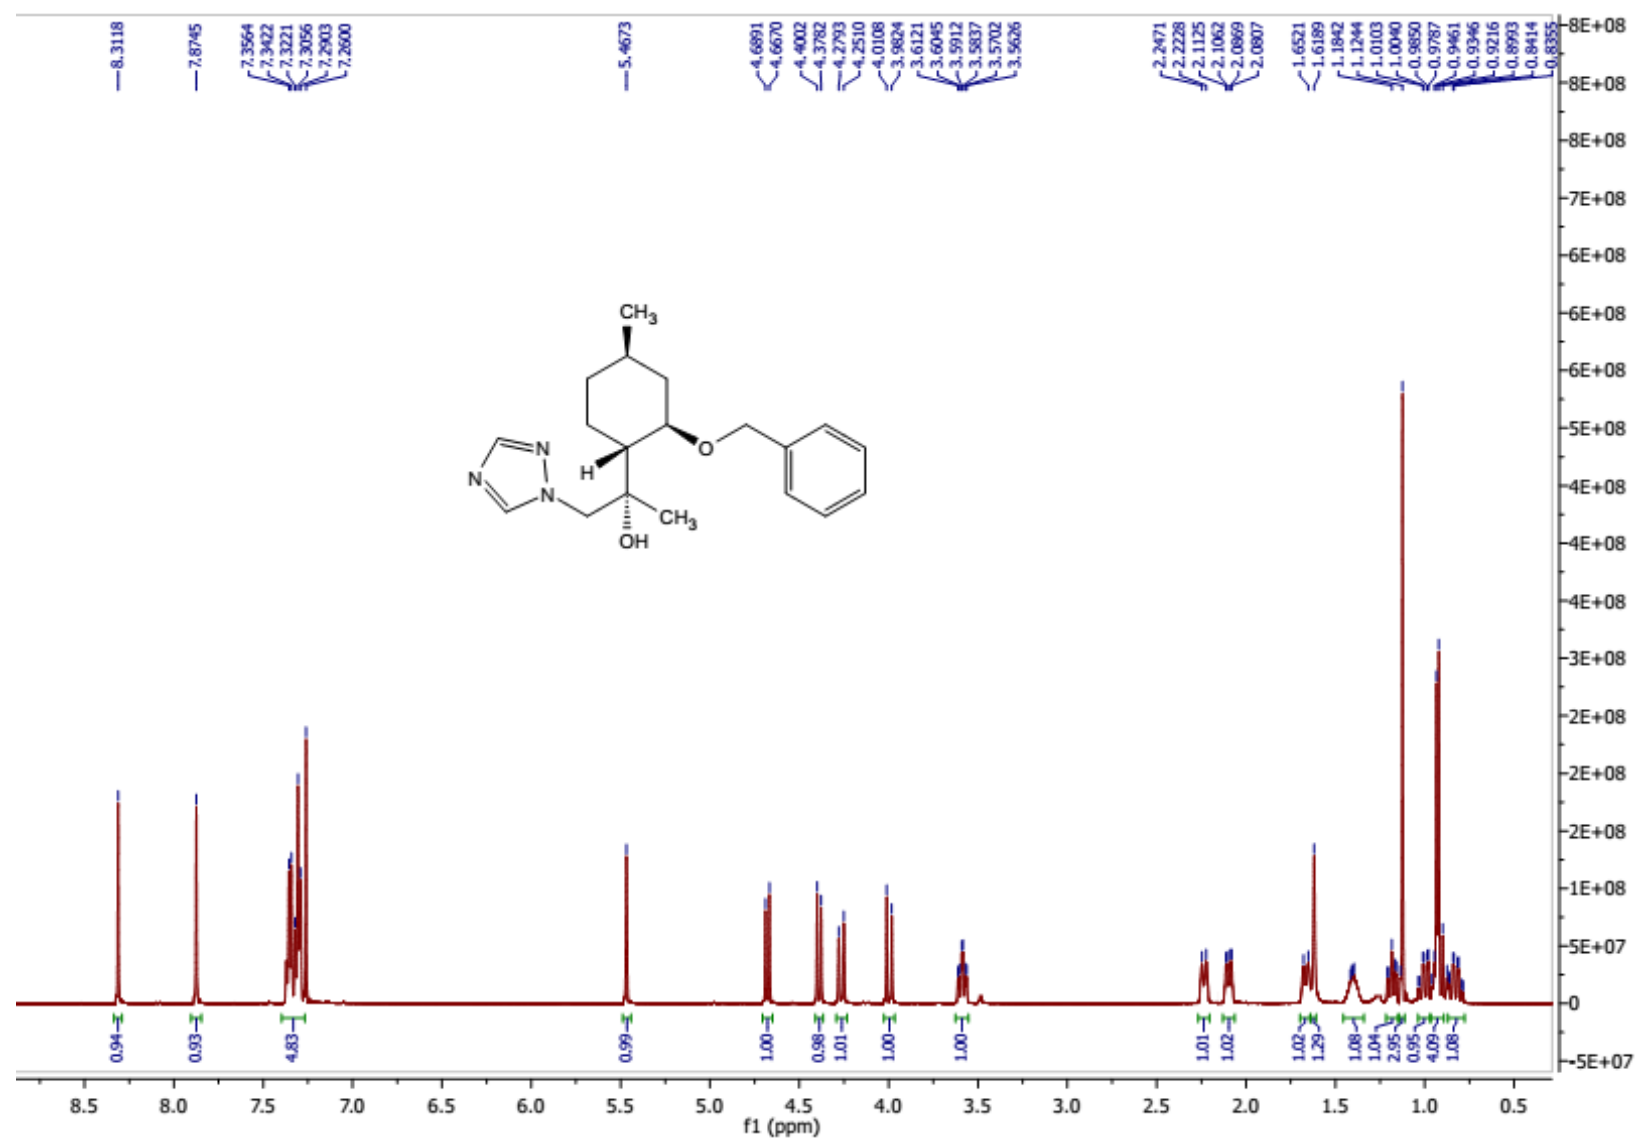

Figure S 95:  $^{13}\text{C}$ -NMR of compound **32b**

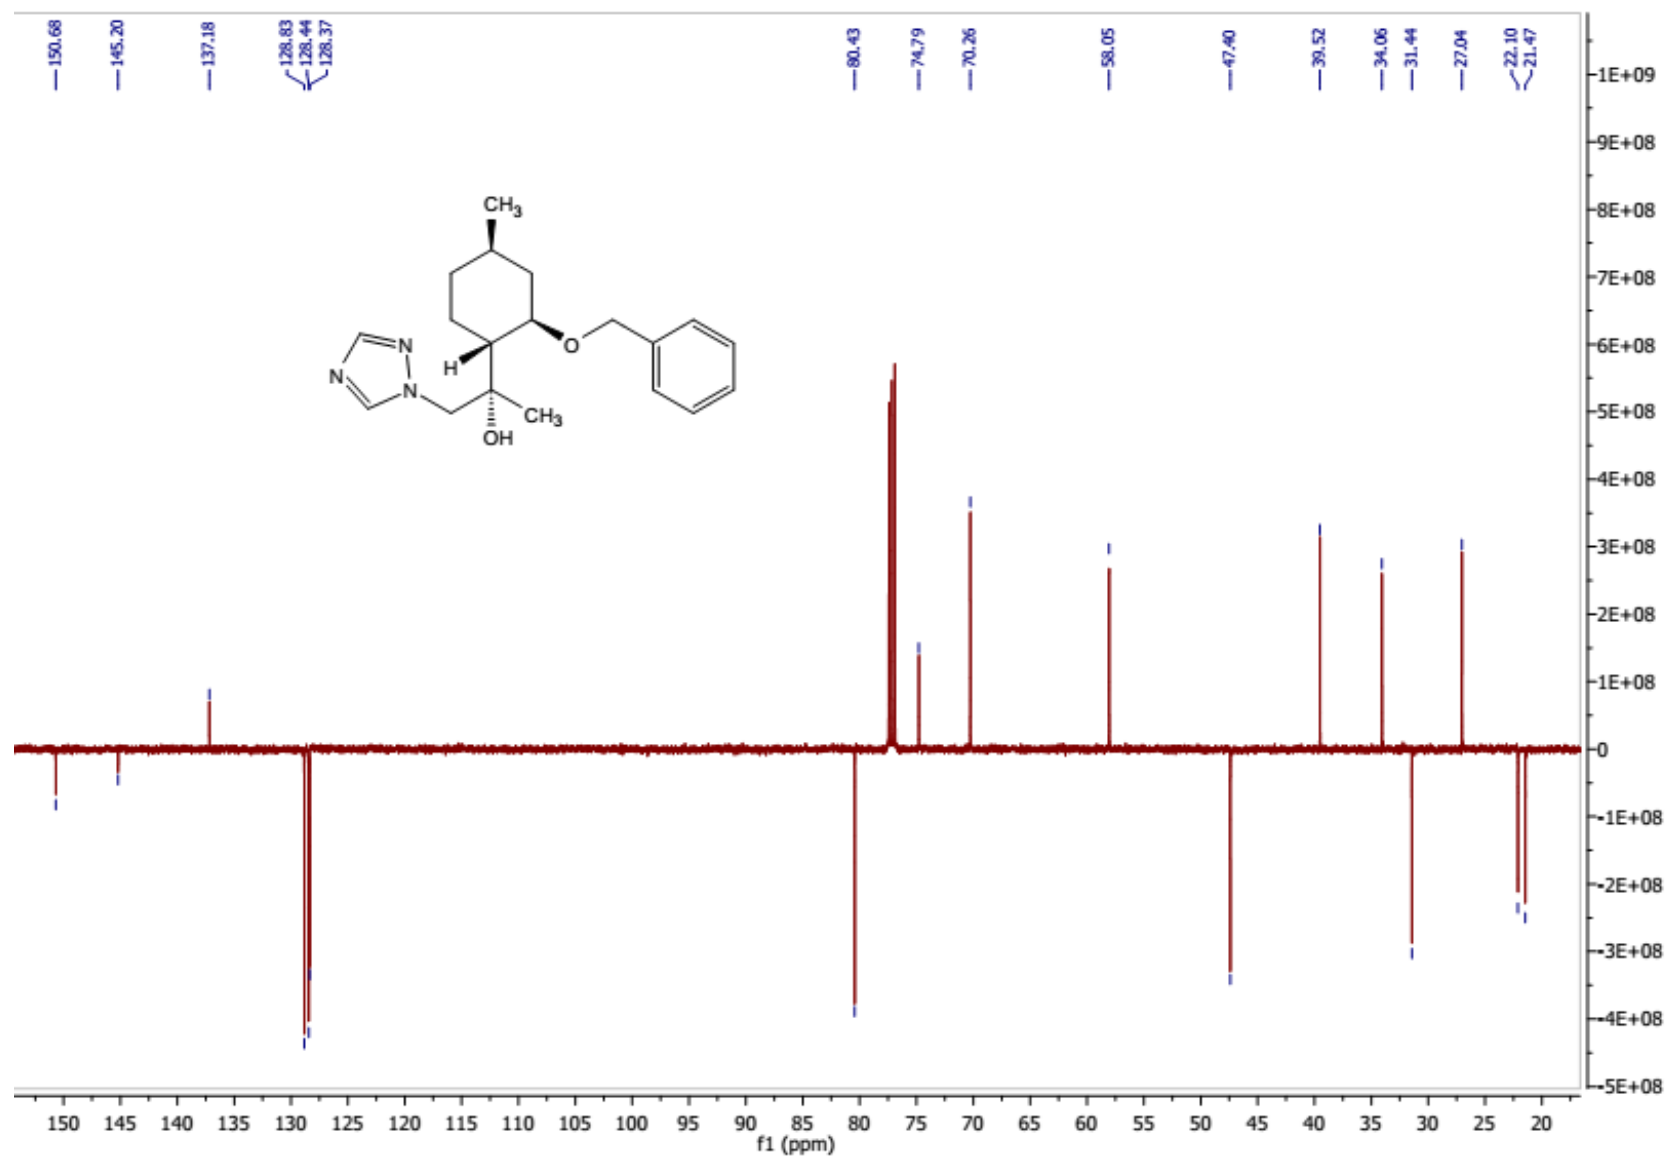

Figure S 96:  $^1\text{H}$ -NMR of compound **34a**

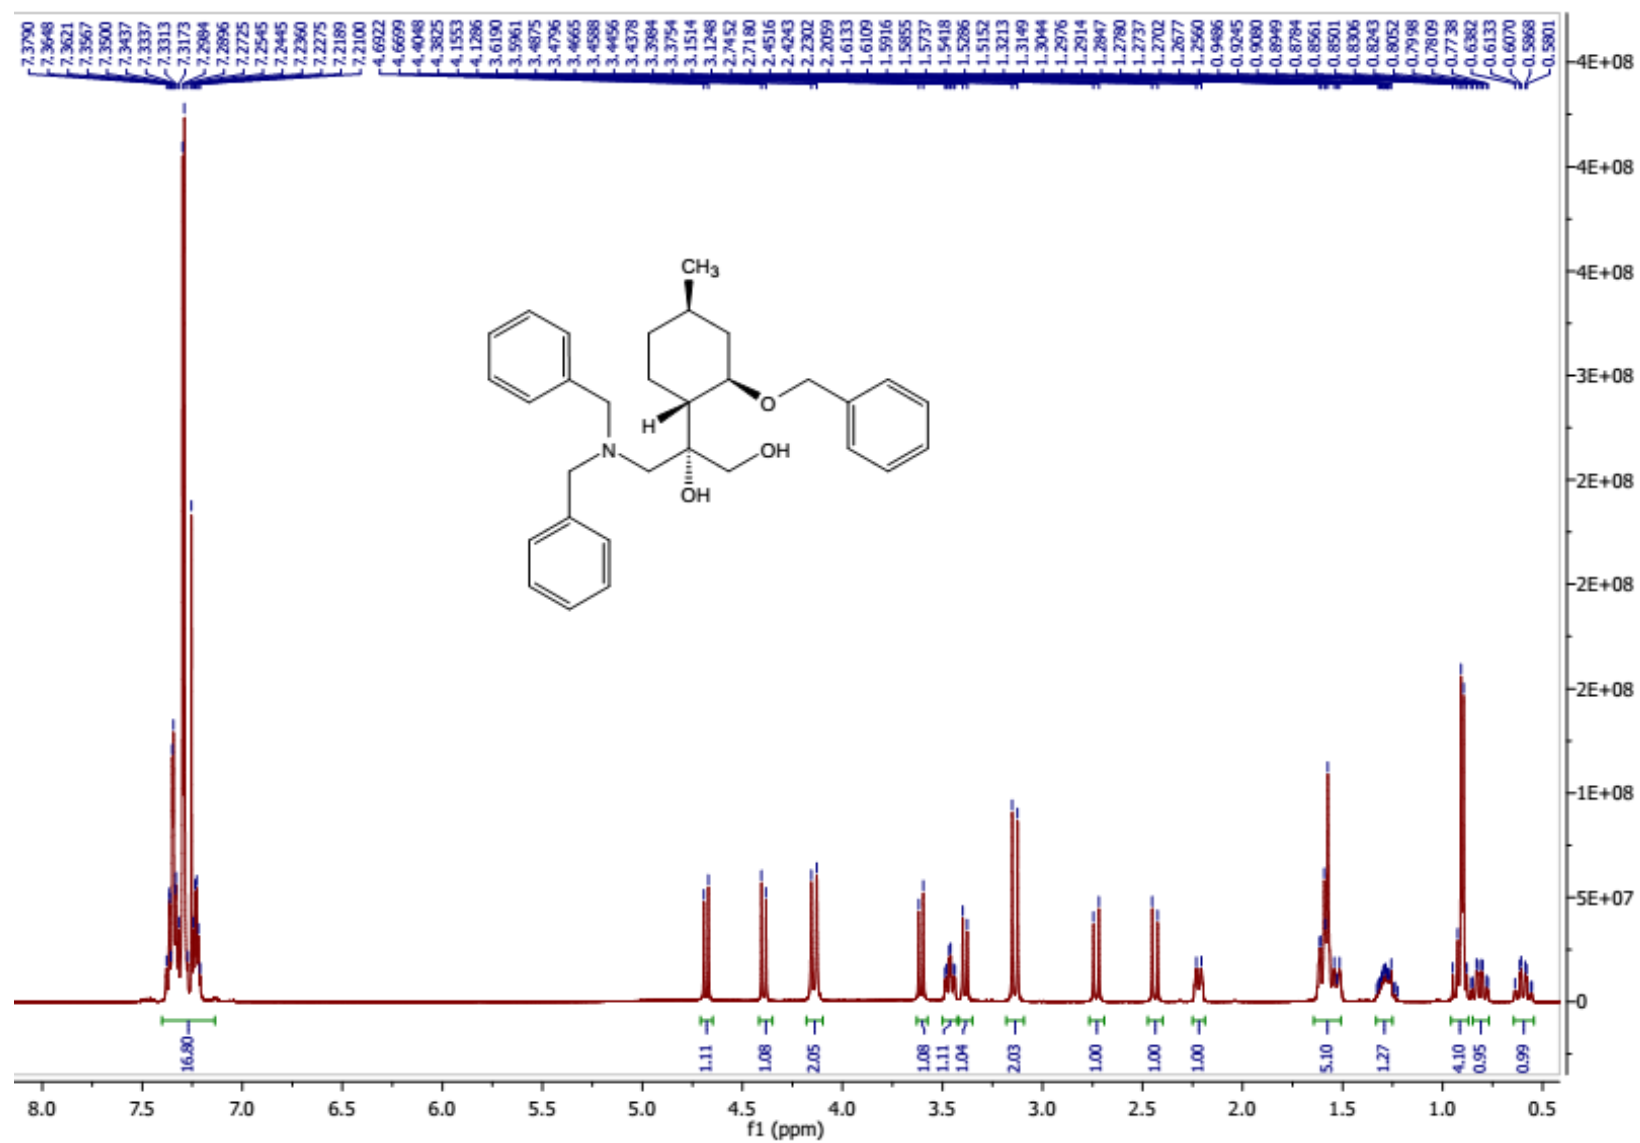

Figure S 97:  $^{13}\text{C}$ -NMR of compound **34a**

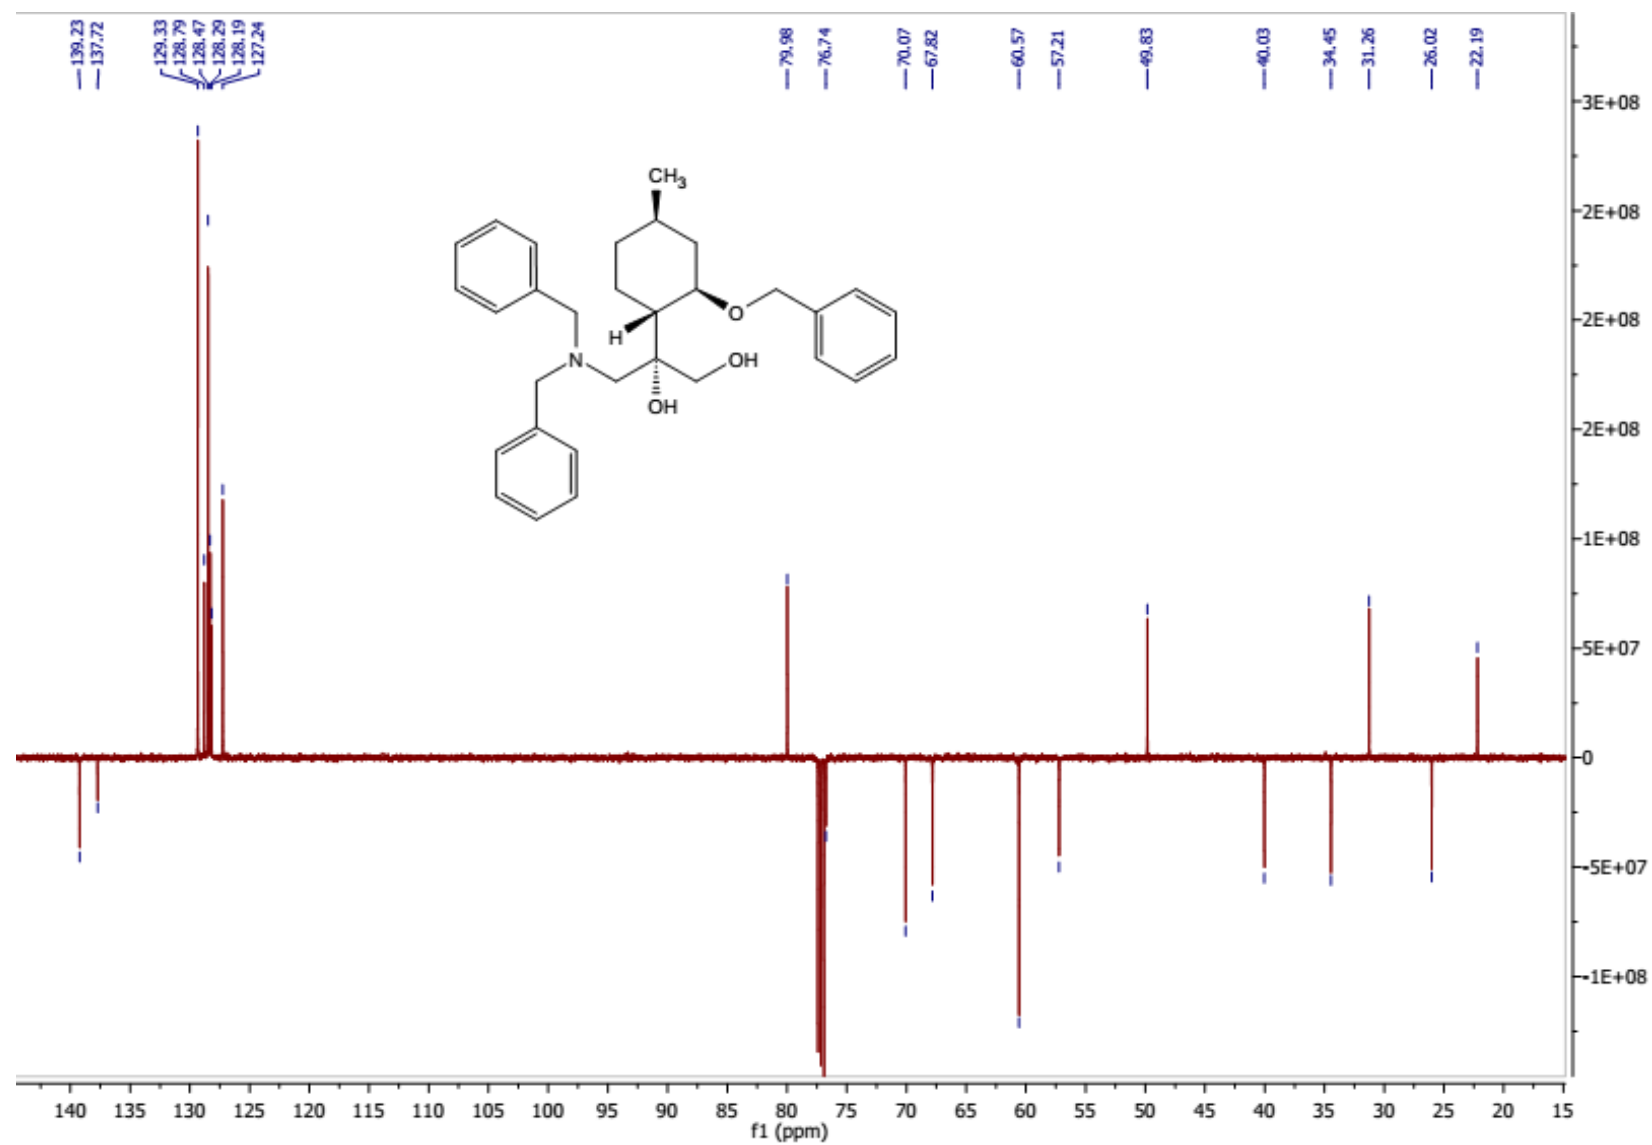



Figure S 98:  $^1\text{H}$ -NMR of compound 35a

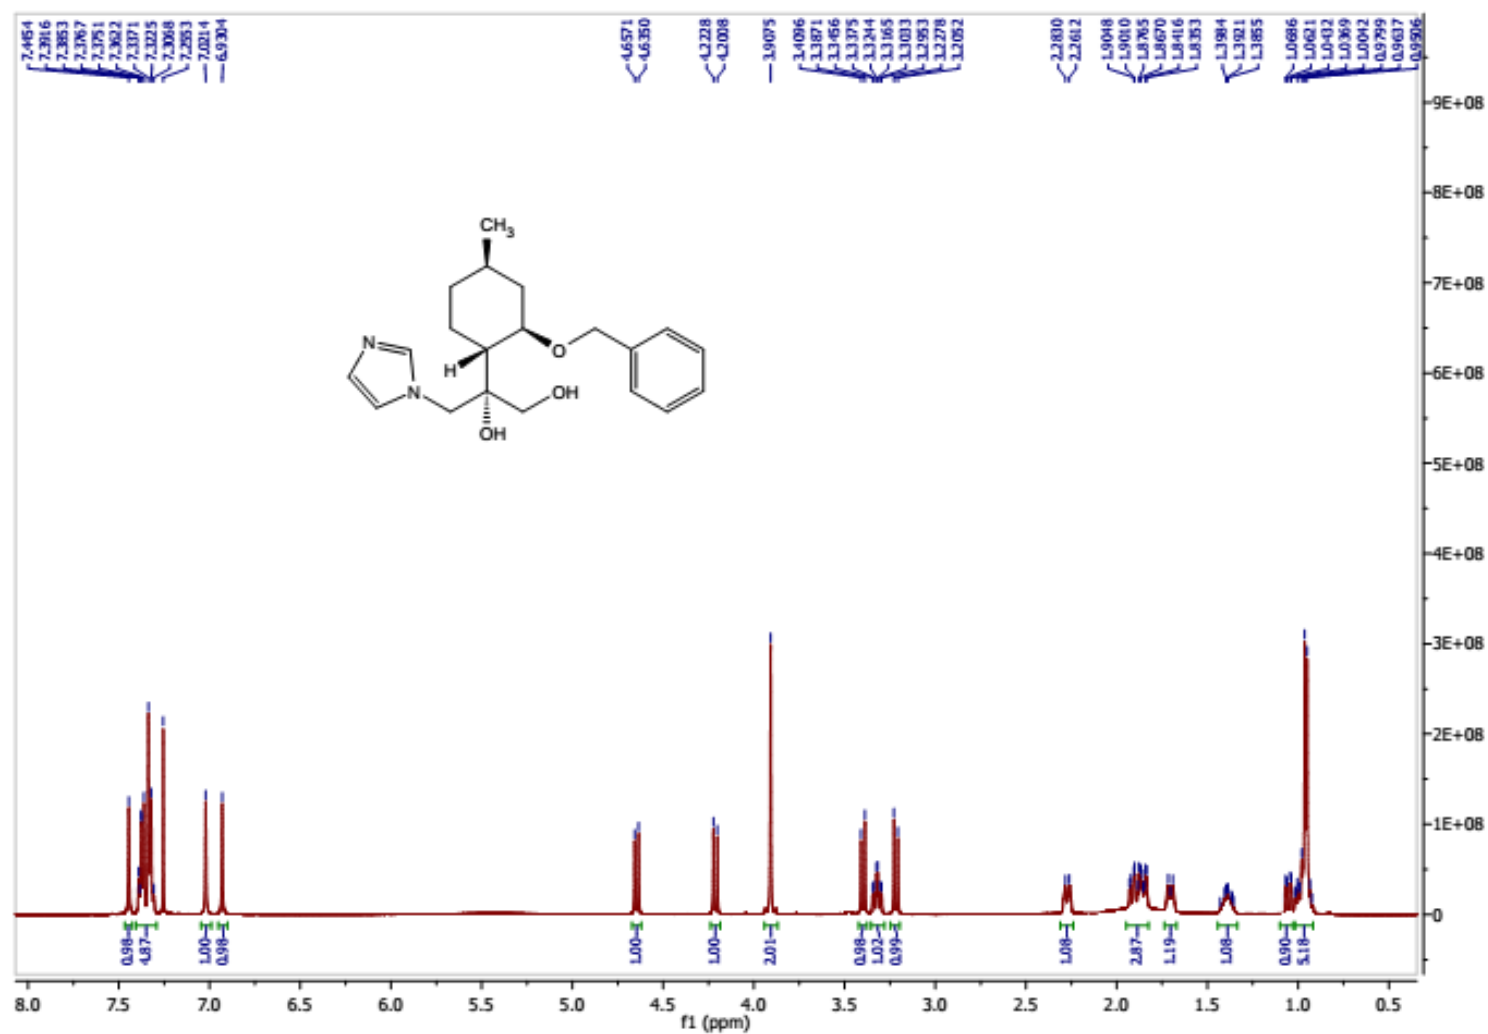

Figure S 99:  $^{13}\text{C}$ -NMR of compound **35a**

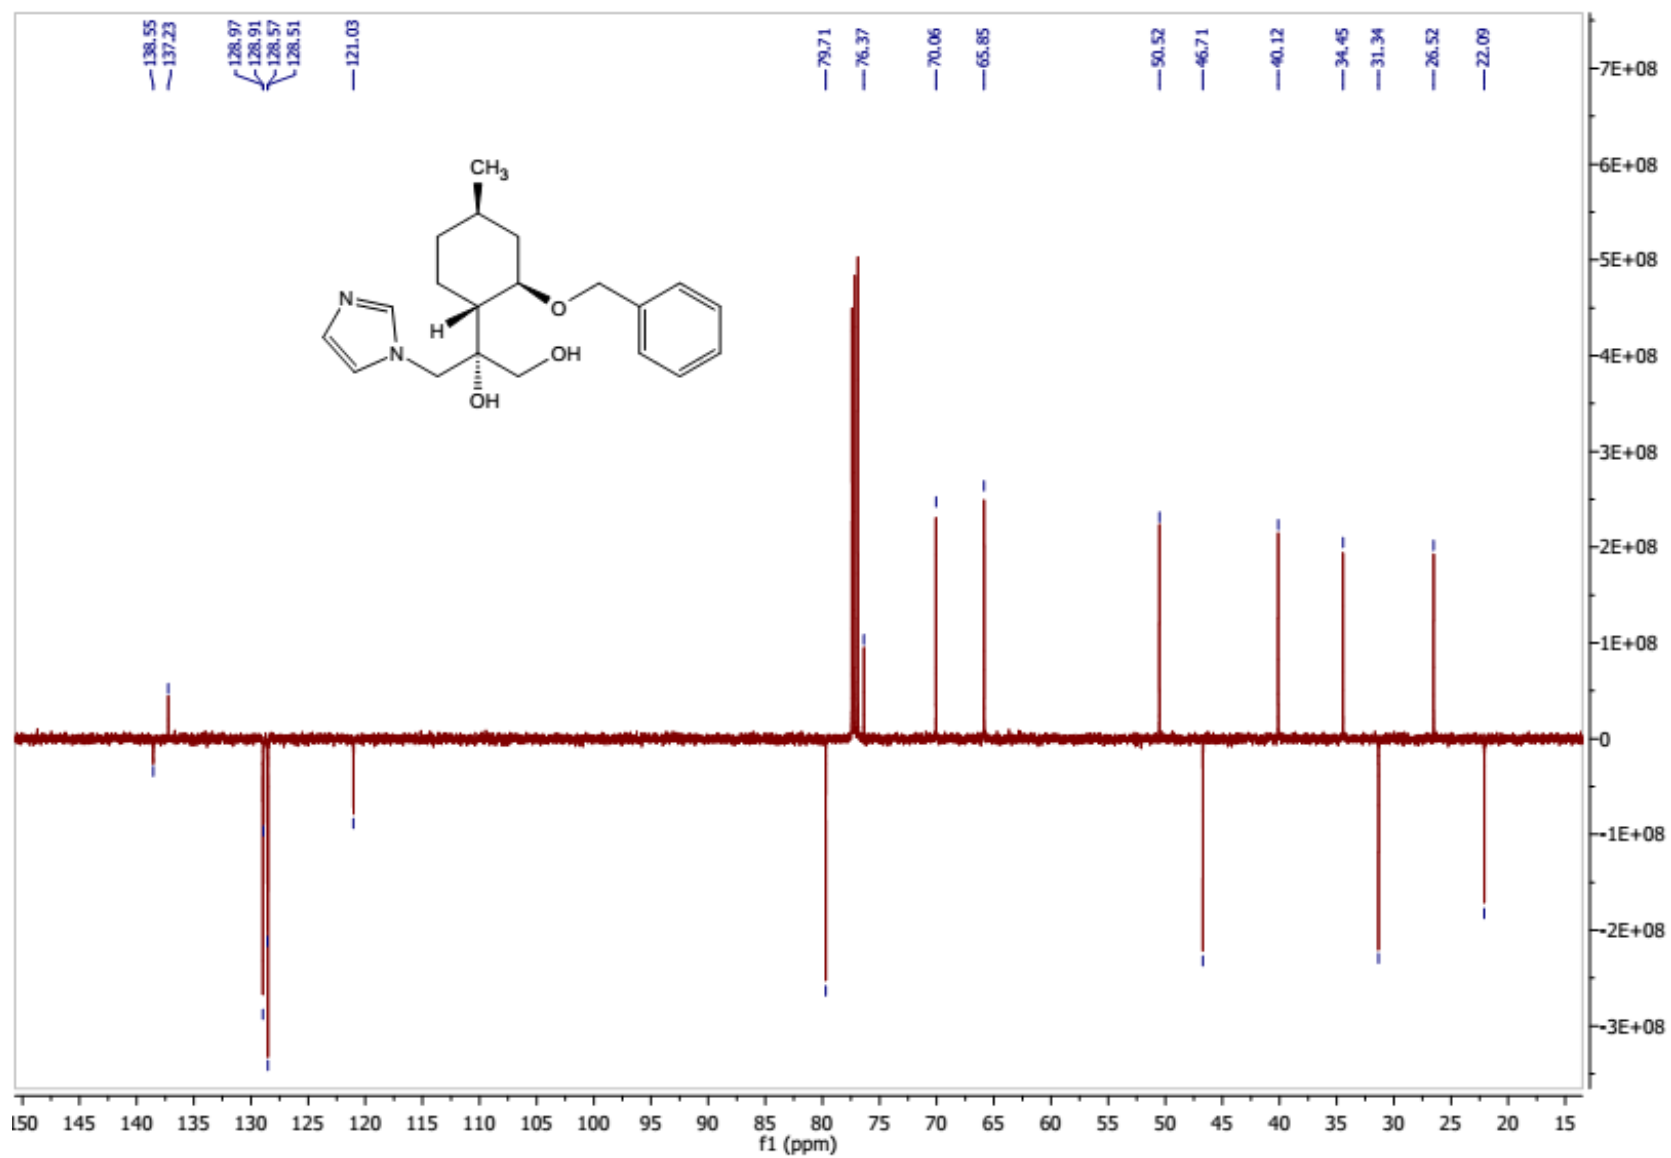

Figure S 100:  $^1\text{H}$ -NMR of compound **35b**

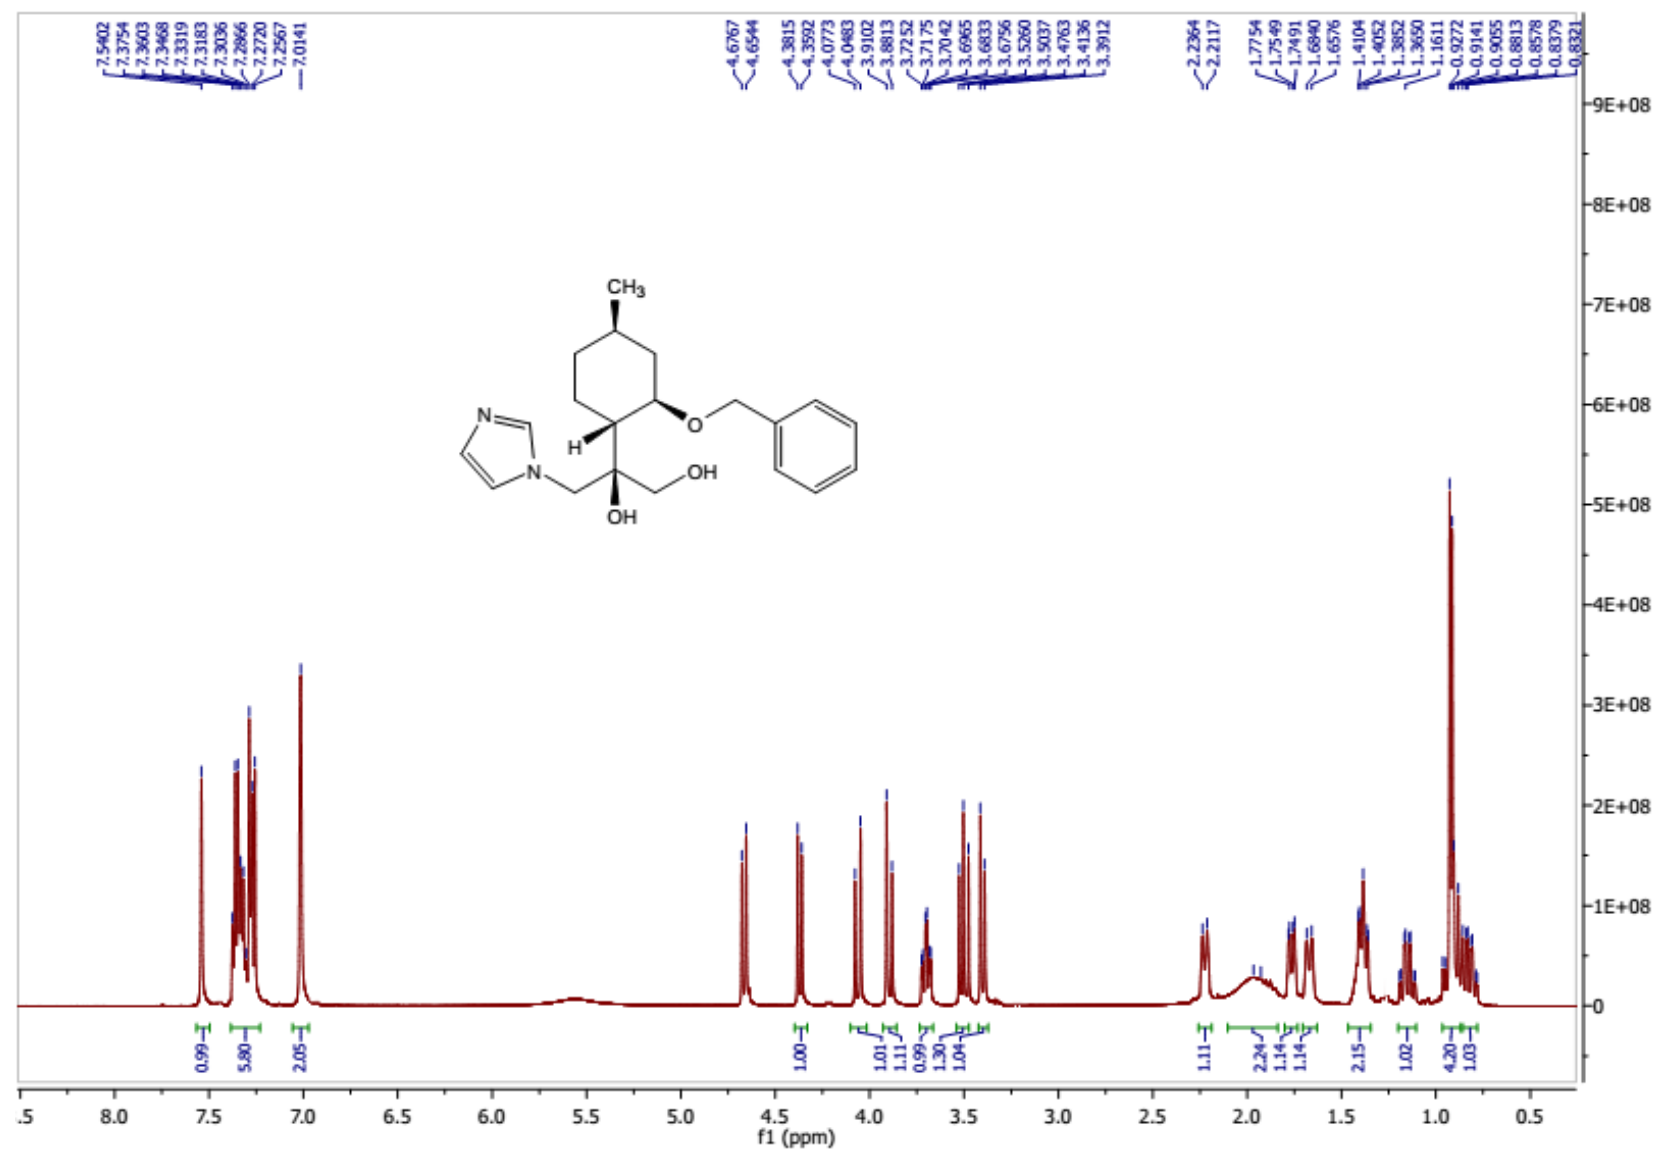

Figure S 101:  $^{13}\text{C}$ -NMR of compound **35b**

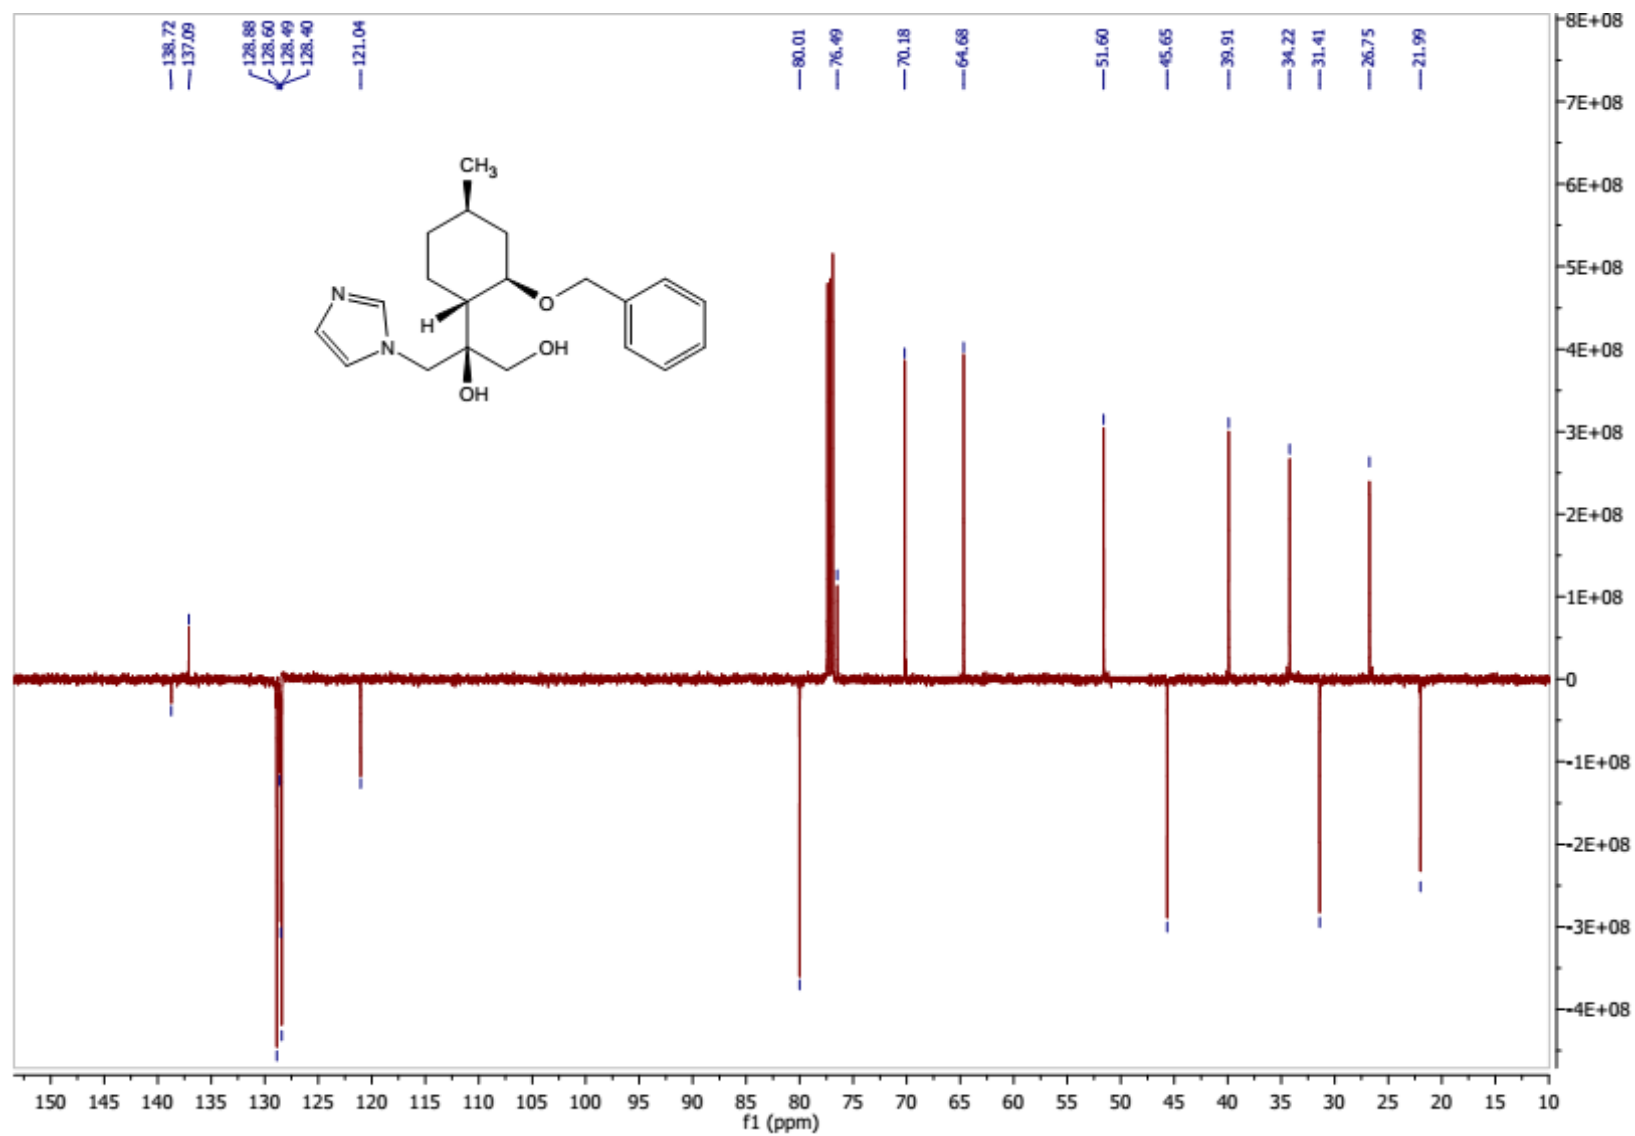

Chemical structure of compound 10 is shown above the spectrum. The structure is a cyclohexane ring with a methyl group at C1, a 1H-imidazol-2-ylmethyl group at C2, a hydroxymethyl group at C3, and a (benzyloxy)methyl group at C4.

Integration values (from left to right): 1.80, 4.62, 0.93, 1.84, 0.91, 0.99, 1.84, 1.09, 0.97, 1.93, 1.03, 0.70, 0.98, 4.80.

Peak positions (ppm) listed on the right side of the spectrum (from top to bottom): 7.9253, 7.9135, 7.4205, 7.4040, 7.3915, 7.3619, 7.3503, 7.3470, 7.3371, 7.2610, 7.1759, 7.1637, 7.1503, 7.1370, 7.1237, 7.1104, 7.0971, 7.0838, 7.0705, 7.0572, 7.0439, 7.0306, 7.0173, 7.0040, 6.9907, 6.9774, 6.9641, 6.9508, 6.9375, 6.9242, 6.9109, 6.8976, 6.8843, 6.8710, 6.8577, 6.8444, 6.8311, 6.8178, 6.8045, 6.7912, 6.7779, 6.7646, 6.7513, 6.7380, 6.7247, 6.7114, 6.6981, 6.6848, 6.6715, 6.6582, 6.6449, 6.6316, 6.6183, 6.6050, 6.5917, 6.5784, 6.5651, 6.5518, 6.5385, 6.5252, 6.5119, 6.4986, 6.4853, 6.4720, 6.4587, 6.4454, 6.4321, 6.4188, 6.4055, 6.3922, 6.3789, 6.3656, 6.3523, 6.3390, 6.3257, 6.3124, 6.2991, 6.2858, 6.2725, 6.2592, 6.2459, 6.2326, 6.2193, 6.2060, 6.1927, 6.1794, 6.1661, 6.1528, 6.1395, 6.1262, 6.1129, 6.0996, 6.0863, 6.0730, 6.0597, 6.0464, 6.0331, 6.0198, 6.0065, 5.9932, 5.9799, 5.9666, 5.9533, 5.9400, 5.9267, 5.9134, 5.9001, 5.8868, 5.8735, 5.8602, 5.8469, 5.8336, 5.8203, 5.8070, 5.7937, 5.7804, 5.7671, 5.7538, 5.7405, 5.7272, 5.7139, 5.7006, 5.6873, 5.6740, 5.6607, 5.6474, 5.6341, 5.6208, 5.6075, 5.5942, 5.5809, 5.5676, 5.5543, 5.5410, 5.5277, 5.5144, 5.5011, 5.4878, 5.4745, 5.4612, 5.4479, 5.4346, 5.4213, 5.4080, 5.3947, 5.3814, 5.3681, 5.3548, 5.3415, 5.3282, 5.3149, 5.3016, 5.2883, 5.2750, 5.2617, 5.2484, 5.2351, 5.2218, 5.2085, 5.1952, 5.1819, 5.1686, 5.1553, 5.1420, 5.1287, 5.1154, 5.1021, 5.0888, 5.0755, 5.0622, 5.0489, 5.0356, 5.0223, 5.0090, 4.9957, 4.9824, 4.9691, 4.9558, 4.9425, 4.9292, 4.9159, 4.9026, 4.8893, 4.8760, 4.8627, 4.8494, 4.8361, 4.8228, 4.8095, 4.7962, 4.7829, 4.7696, 4.7563, 4.7430, 4.7297, 4.7164, 4.7031, 4.6898, 4.6765, 4.6632, 4.6499, 4.6366, 4.6233, 4.6100, 4.5967, 4.5834, 4.5701, 4.5568, 4.5435, 4.5302, 4.5169, 4.5036, 4.4903, 4.4770, 4.4637, 4.4504, 4.4371, 4.4238, 4.4105, 4.3972, 4.3839, 4.3706, 4.3573, 4.3440, 4.3307, 4.3174, 4.3041, 4.2908, 4.2775, 4.2642, 4.2509, 4.2376, 4.2243, 4.2110, 4.1977, 4.1844, 4.1711, 4.1578, 4.1445, 4.1312, 4.1179, 4.1046, 4.0913, 4.0780, 4.0647, 4.0514, 4.0381, 4.0248, 4.0115, 3.9982, 3.9849, 3.9716, 3.9583, 3.9450, 3.9317, 3.9184, 3.9051, 3.8918, 3.8785, 3.8652, 3.8519, 3.8386, 3.8253, 3.8120, 3.7987, 3.7854, 3.7721, 3.7588, 3.7455, 3.7322, 3.7189, 3.7056, 3.6923, 3.6790, 3.6657, 3.6524, 3.6391, 3.6258, 3.6125, 3.5992, 3.5859, 3.5726, 3.5593, 3.5460, 3.5327, 3.5194, 3.5061, 3.4928, 3.4795, 3.4662, 3.4529, 3.4396, 3.4263, 3.4130, 3.3997, 3.3864, 3.3731, 3.3598, 3.3465, 3.3332, 3.3199, 3.3066, 3.2933, 3.2800, 3.2667, 3.2534, 3.2401, 3.2268, 3.2135, 3.2002, 3.1869, 3.1736, 3.1603, 3.1470, 3.1337, 3.1204, 3.1071, 3.0938, 3.0805, 3.0672, 3.0539, 3.0406, 3.0273, 3.0140, 3.0007, 2.9874, 2.9741, 2.9608, 2.9475, 2.9342, 2.9209, 2.9076, 2.8943, 2.8810, 2.8677, 2.8544, 2.8411, 2.8278, 2.8145, 2.8012, 2.7879, 2.7746, 2.7613, 2.7480, 2.7347, 2.7214, 2.7081, 2.6948, 2.6815, 2.6682, 2.6549, 2.6416, 2.6283, 2.6150, 2.6017, 2.5884, 2.5751, 2.5618, 2.5485, 2.5352, 2.5219, 2.5086, 2.4953, 2.4820, 2.4687, 2.4554, 2.4421, 2.4288, 2.4155, 2.4022, 2.3889, 2.3756, 2.3623, 2.3490, 2.3357, 2.3224, 2.3091, 2.2958, 2.2825, 2.2692, 2.2559, 2.2426, 2.2293, 2.2160, 2.2027, 2.1894, 2.1761, 2.1628, 2.1495, 2.1362, 2.1229, 2.1096, 2.0963, 2.0830, 2.0697, 2.0564, 2.0431, 2.0298, 2.0165, 2.0032, 1.9899, 1.9766, 1.9633, 1.9500, 1.9367, 1.9234, 1.9101, 1.8968, 1.8835, 1.8702, 1.8569, 1.8436, 1.8303, 1.8170, 1.8037, 1.7904, 1.7771, 1.7638, 1.7505, 1.7372, 1.7239, 1.7106, 1.6973, 1.6840, 1.6707, 1.6574, 1.6441, 1.6308, 1.6175, 1.6042, 1.5909, 1.5776, 1.5643, 1.5510, 1.5377, 1.5244, 1.5111, 1.4978, 1.4845, 1.4712, 1.4579, 1.4446, 1.4313, 1.4180, 1.4047, 1.3914, 1.3781, 1.3648, 1.3515, 1.3382, 1.3249, 1.3116, 1.2983, 1.2850, 1.2717, 1.2584, 1.2451, 1.2318, 1.2185, 1.2052, 1.1919, 1.1786, 1.1653, 1.1520, 1.1387, 1.1254, 1.1121, 1.0988, 1.0855, 1.0722, 1.0589, 1

Figure S 103:  $^{13}\text{C}$ -NMR of compound **36a**

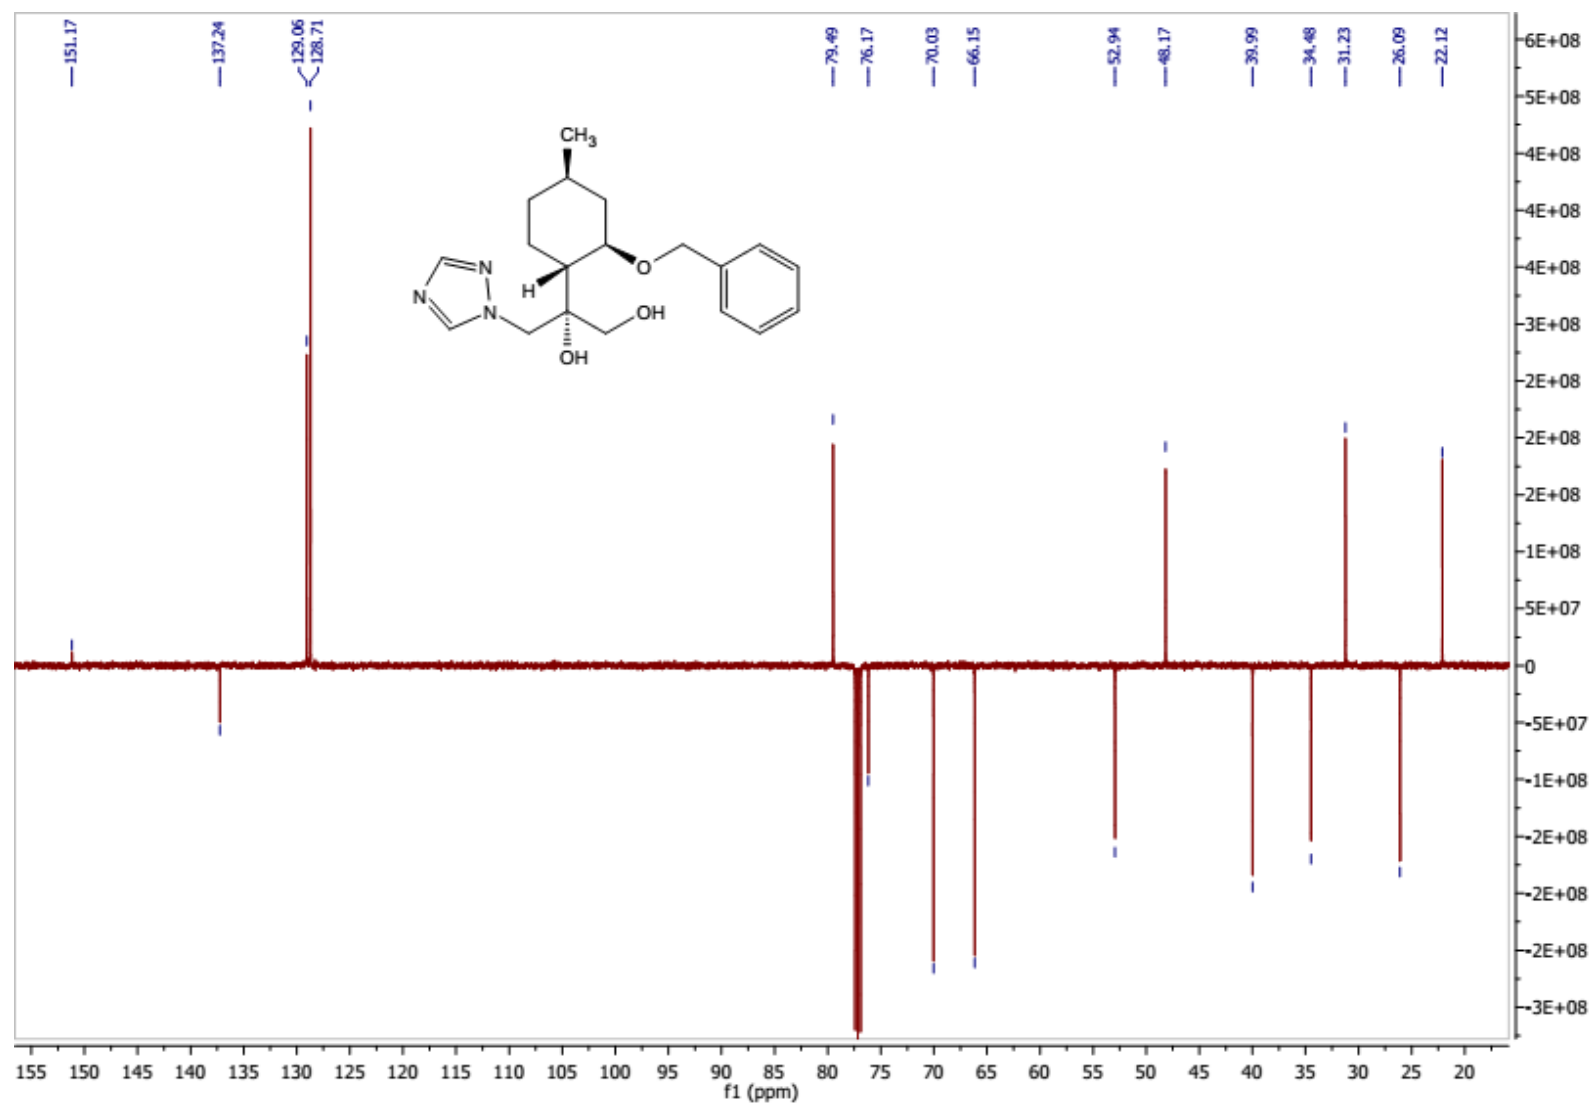

Figure S 104:  $^1\text{H}$ -NMR of compound **36b**

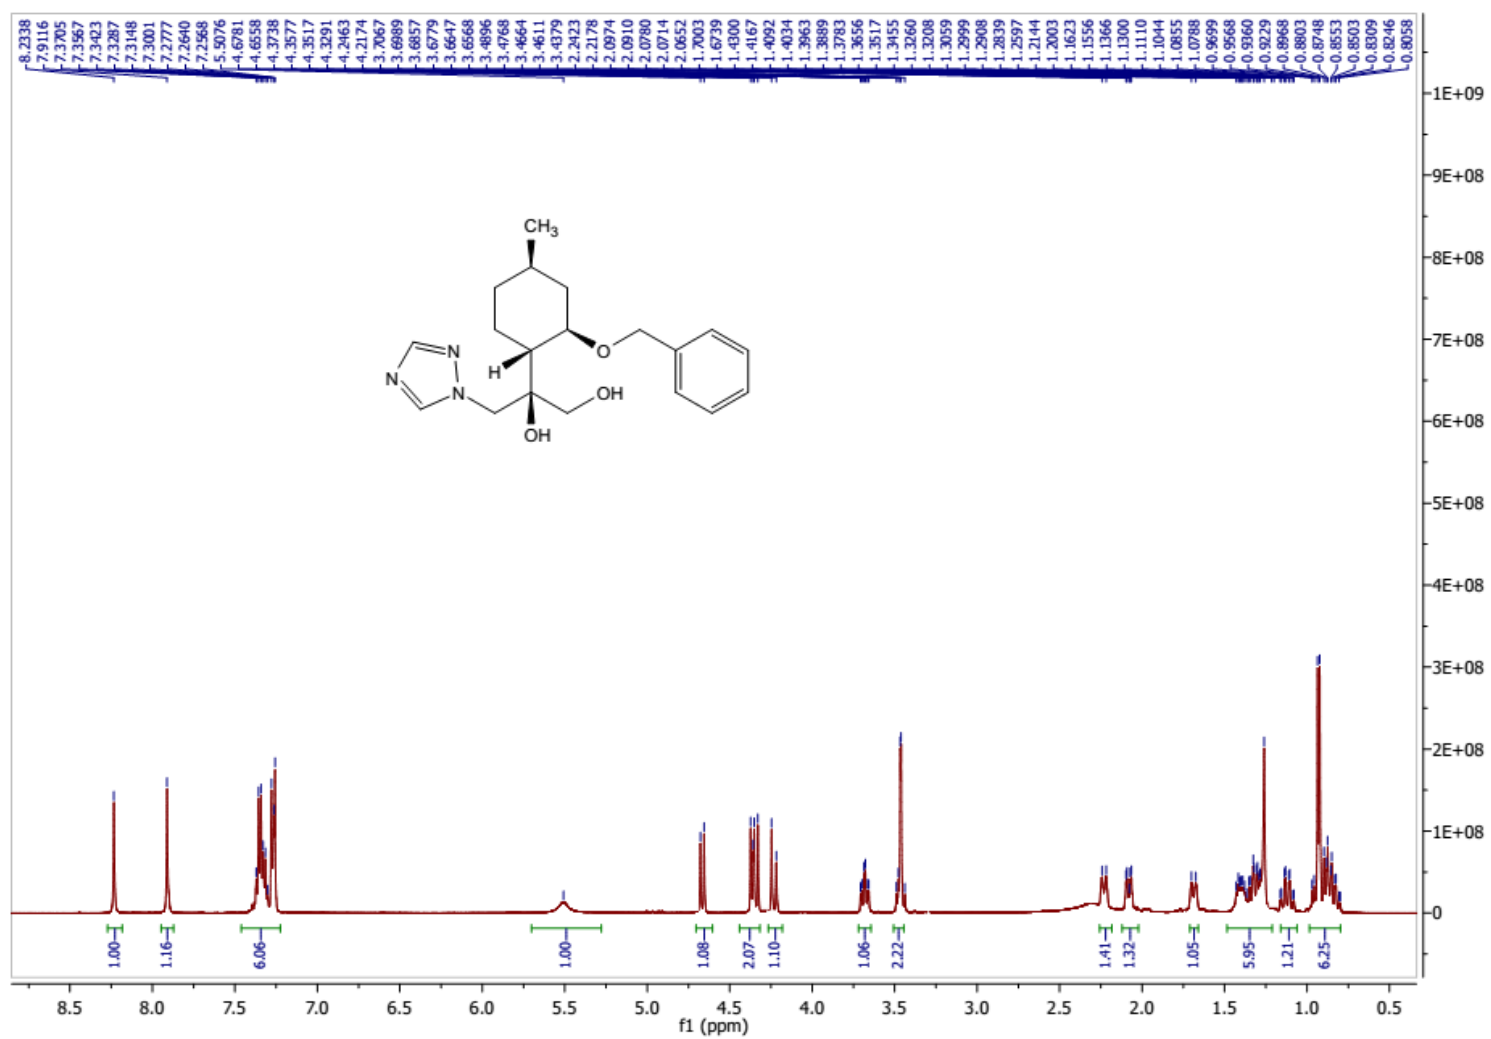

Figure S 105:  $^{13}\text{C}$ -NMR of compound **36b**

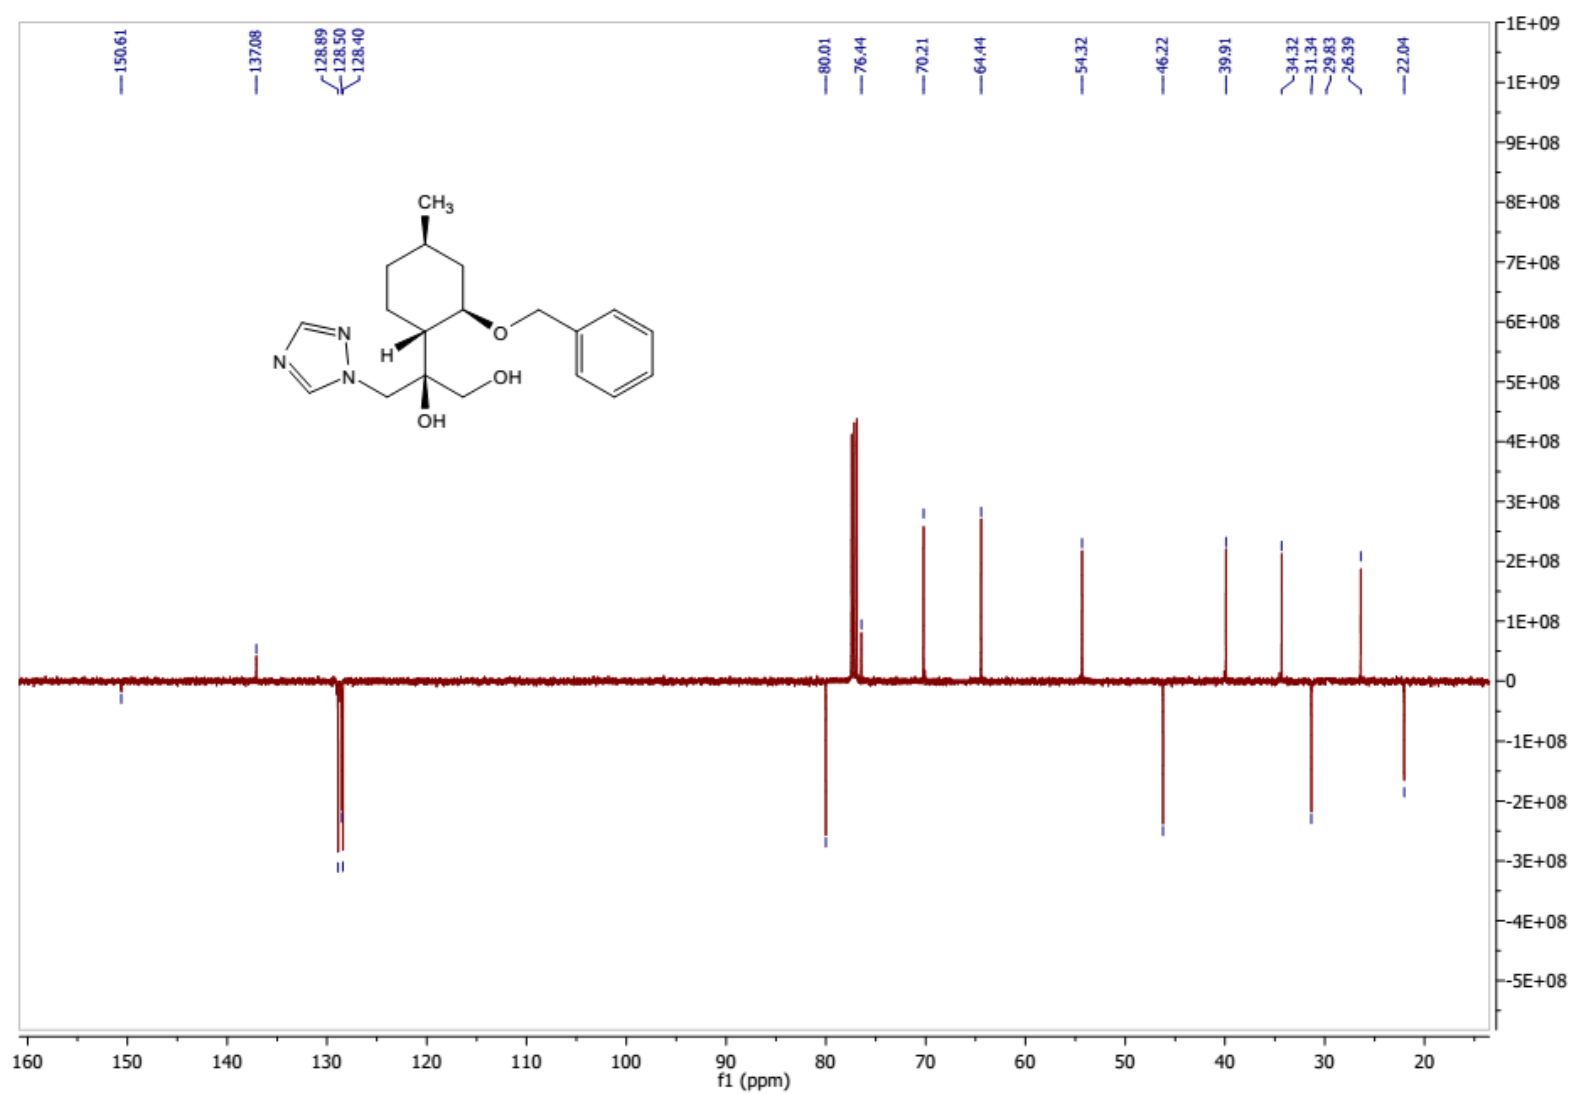



Figure S 106:  $^1\text{H}$ -NMR of compound 38a

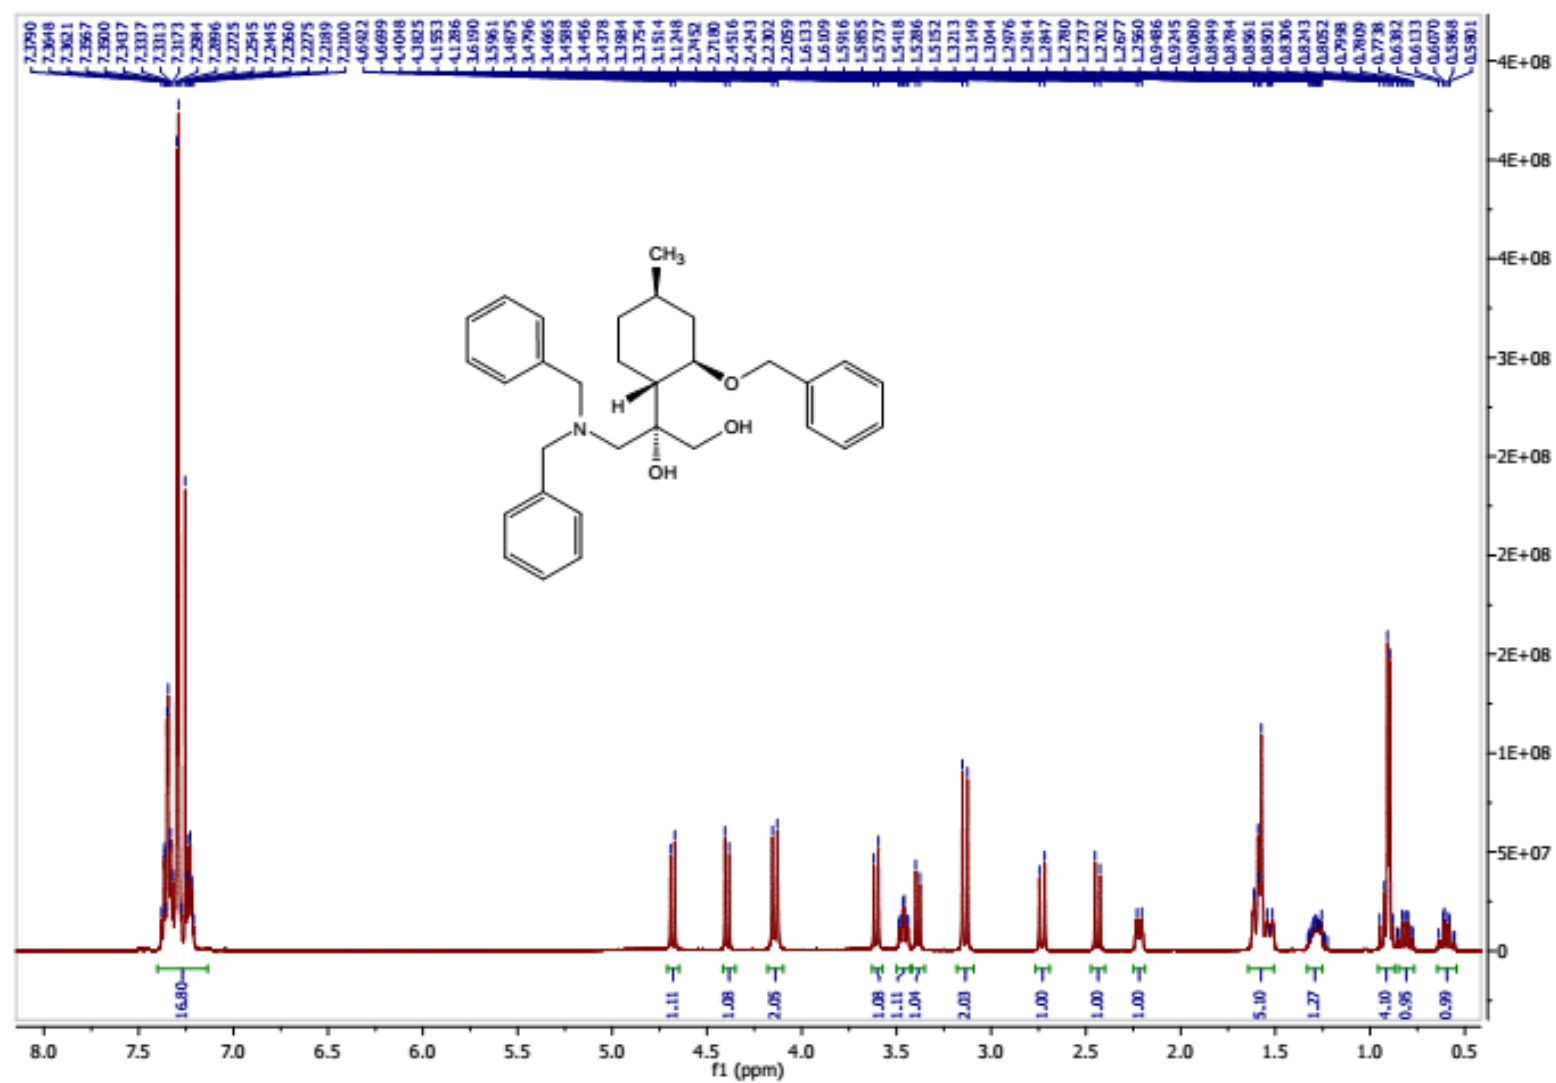

Figure S 107:  $^{13}\text{C}$ -NMR of compound **38b**

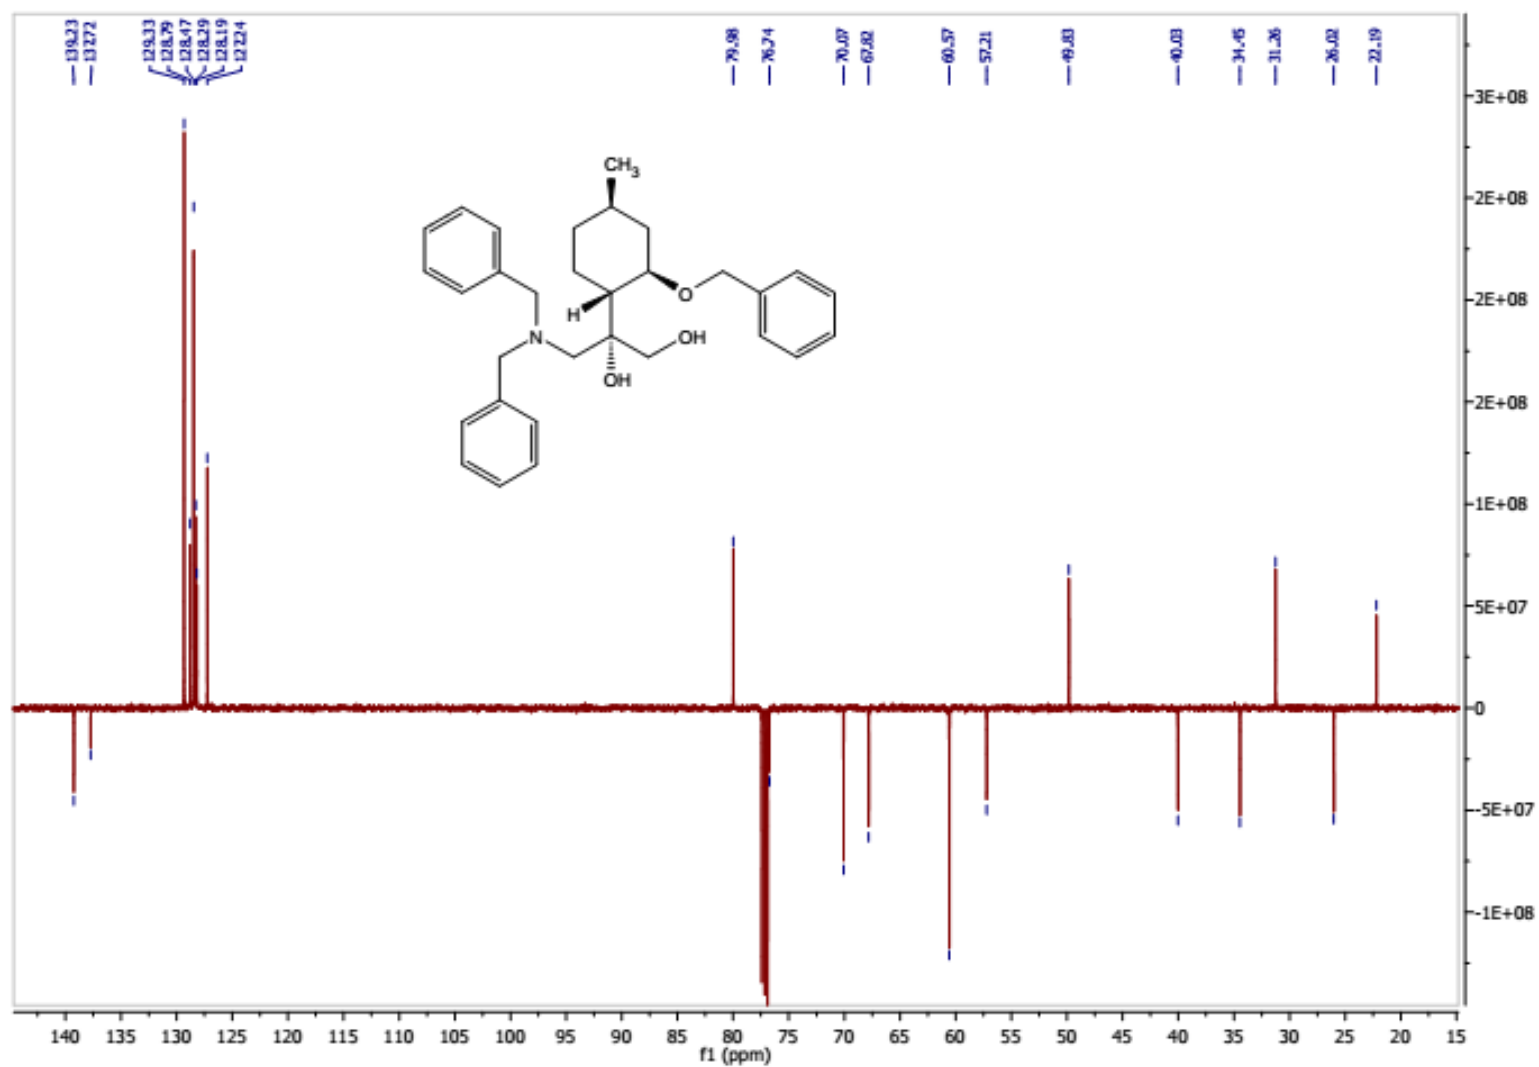

Figure S 108:  $^1\text{H}$ -NMR of compound **38b**

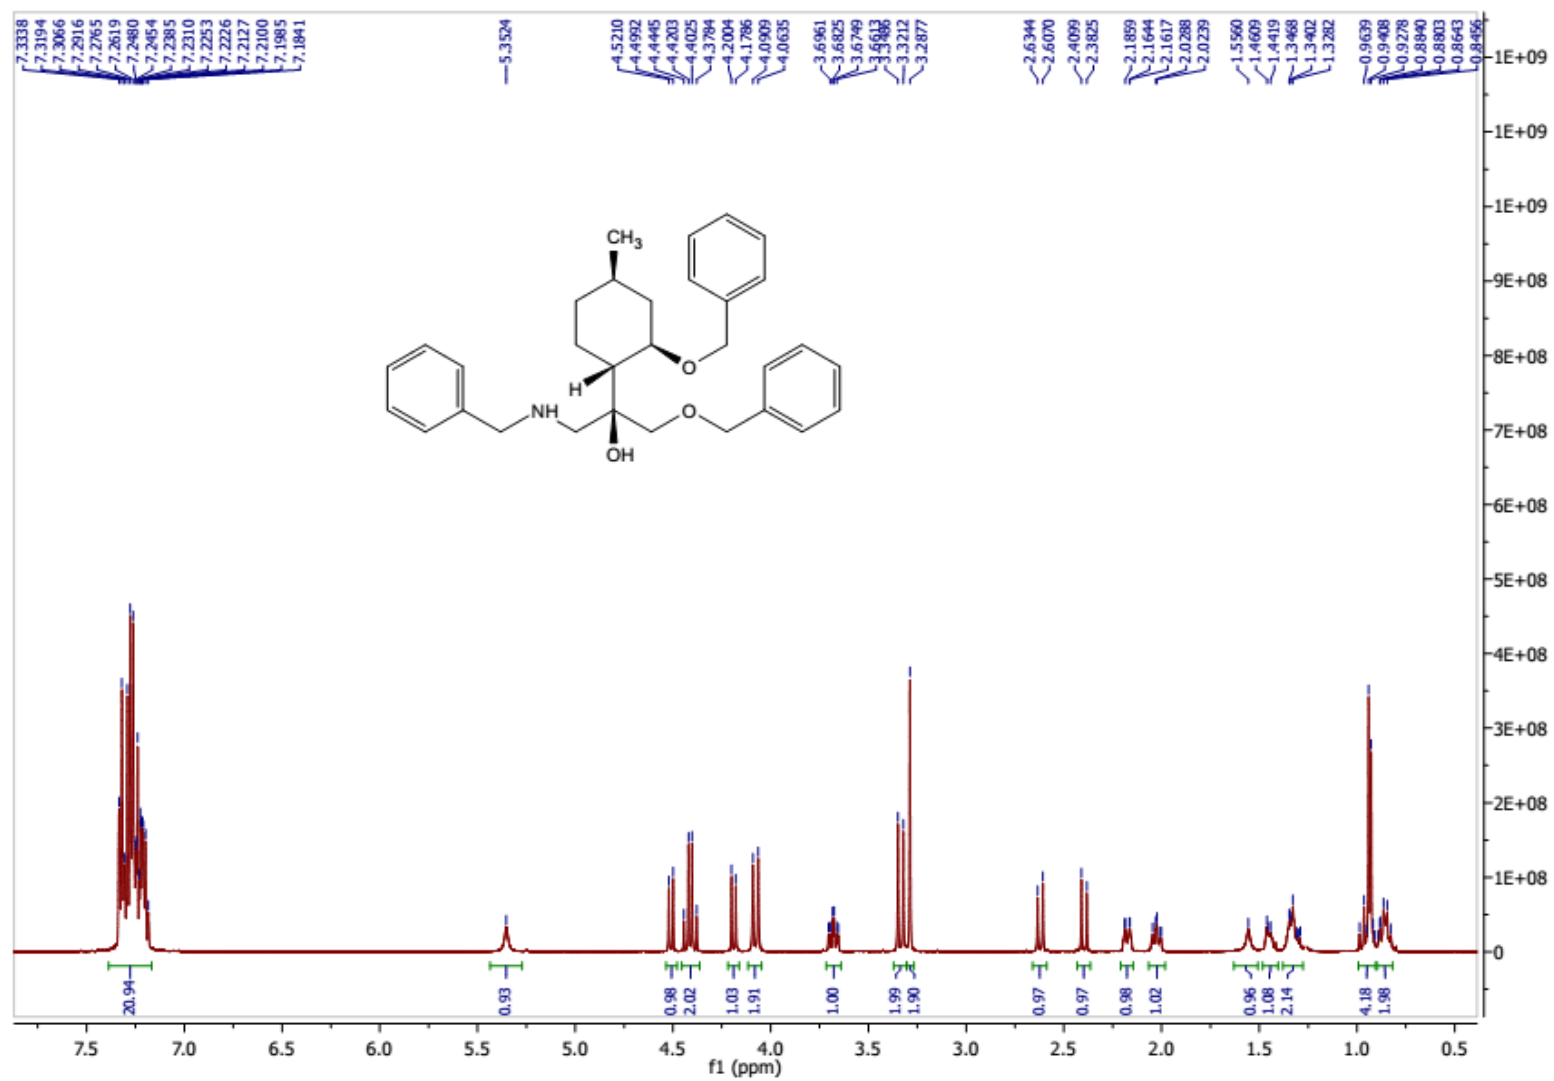

Figure S 109:  $^{13}\text{C}$ -NMR of compound **38b**

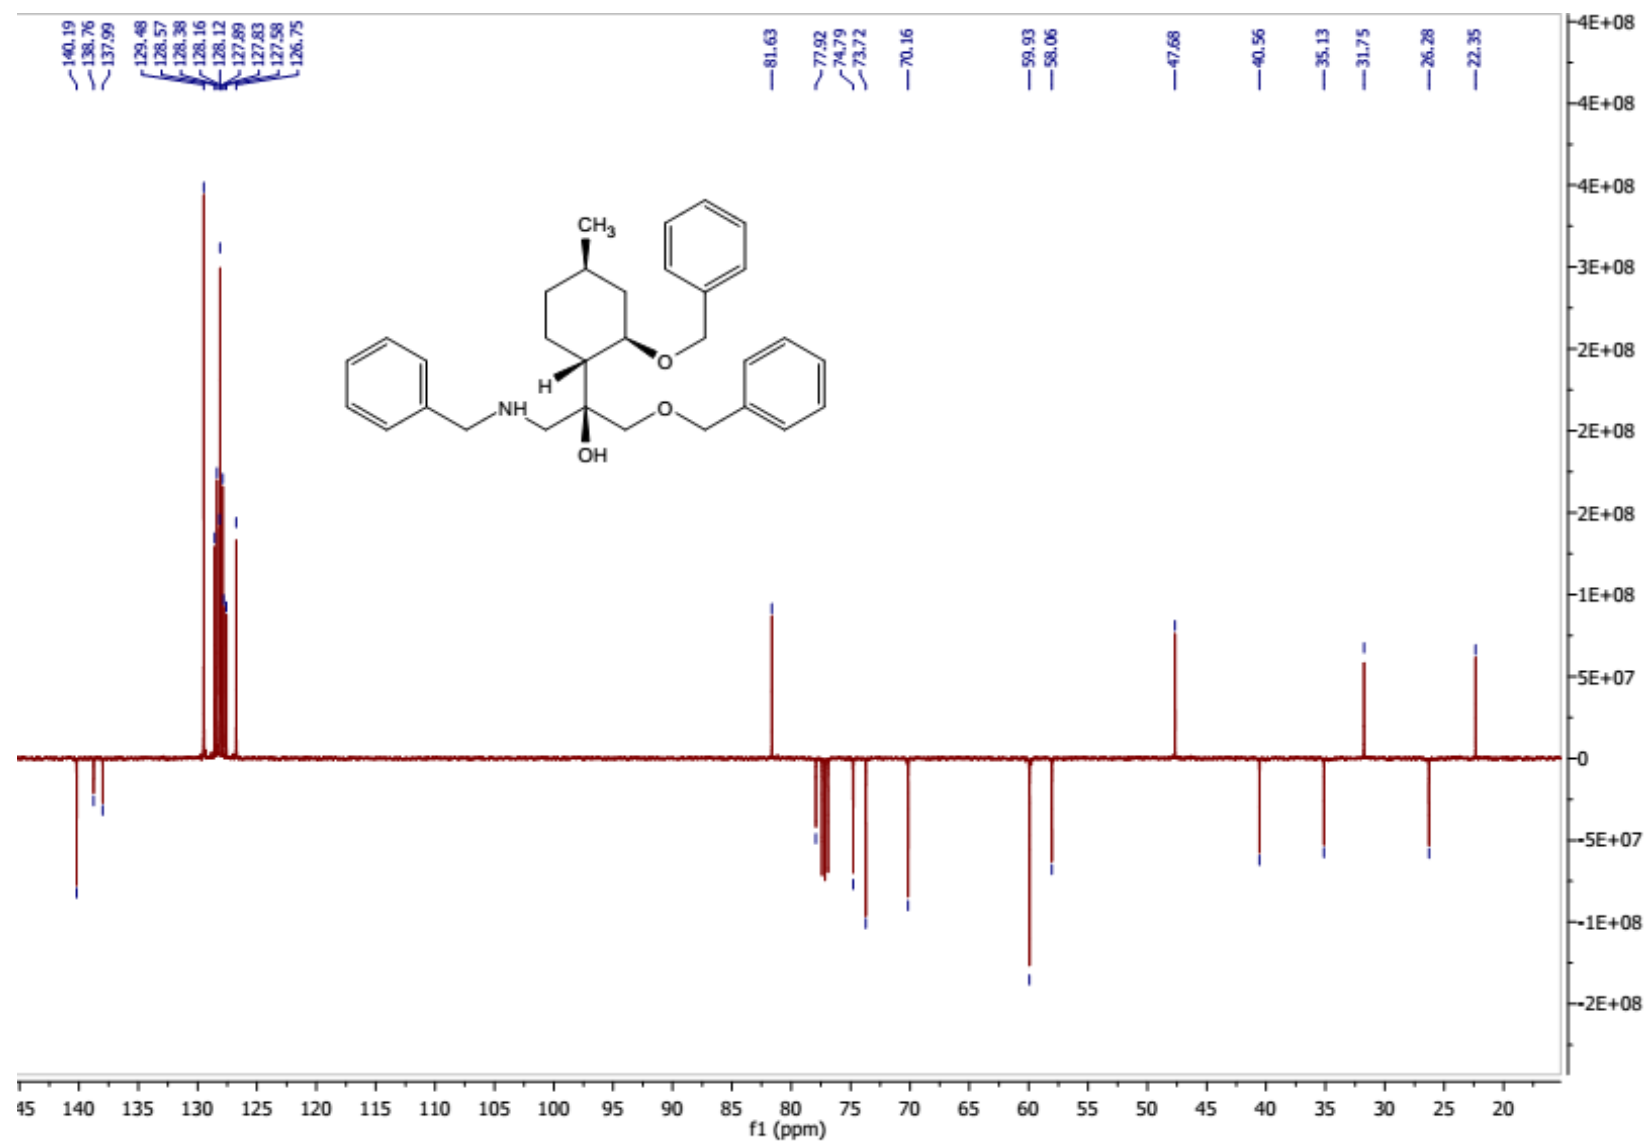

Figure S 110:  $^1\text{H}$ -NMR of compound **39a**

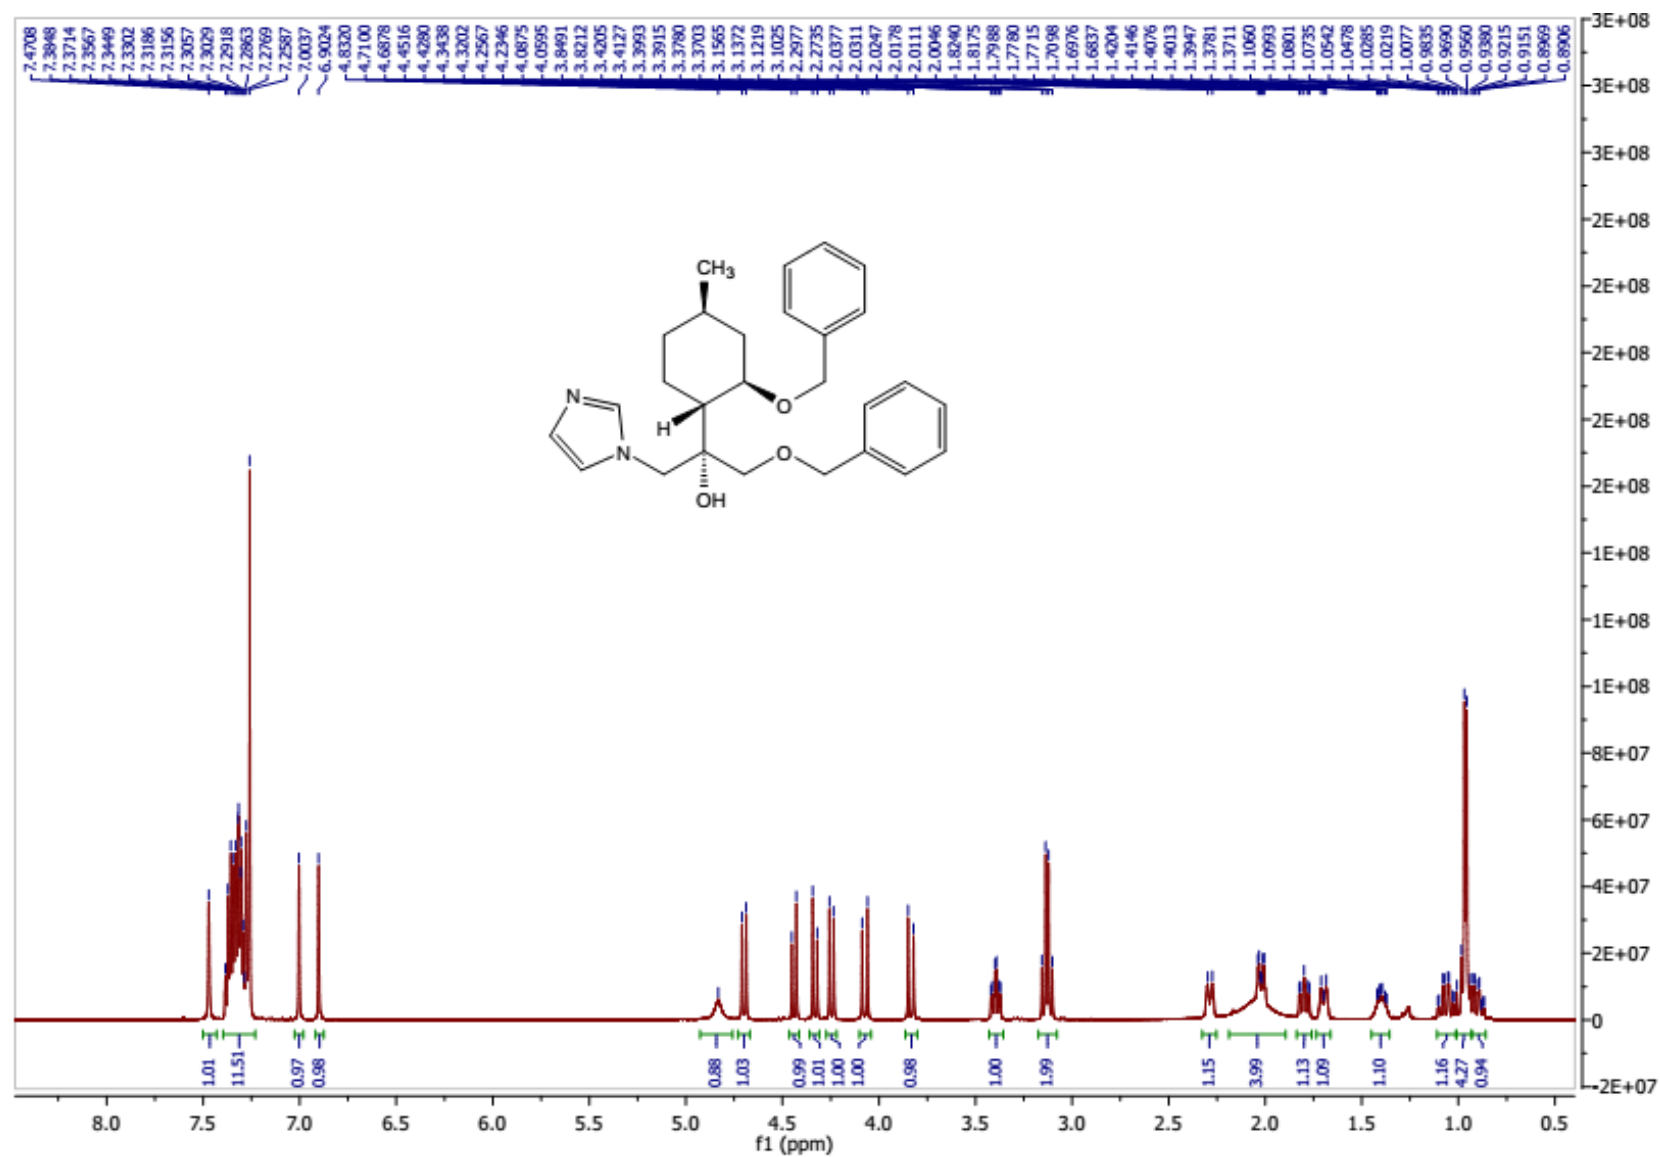

$^{13}\text{C}$ -NMR of compound **39a**

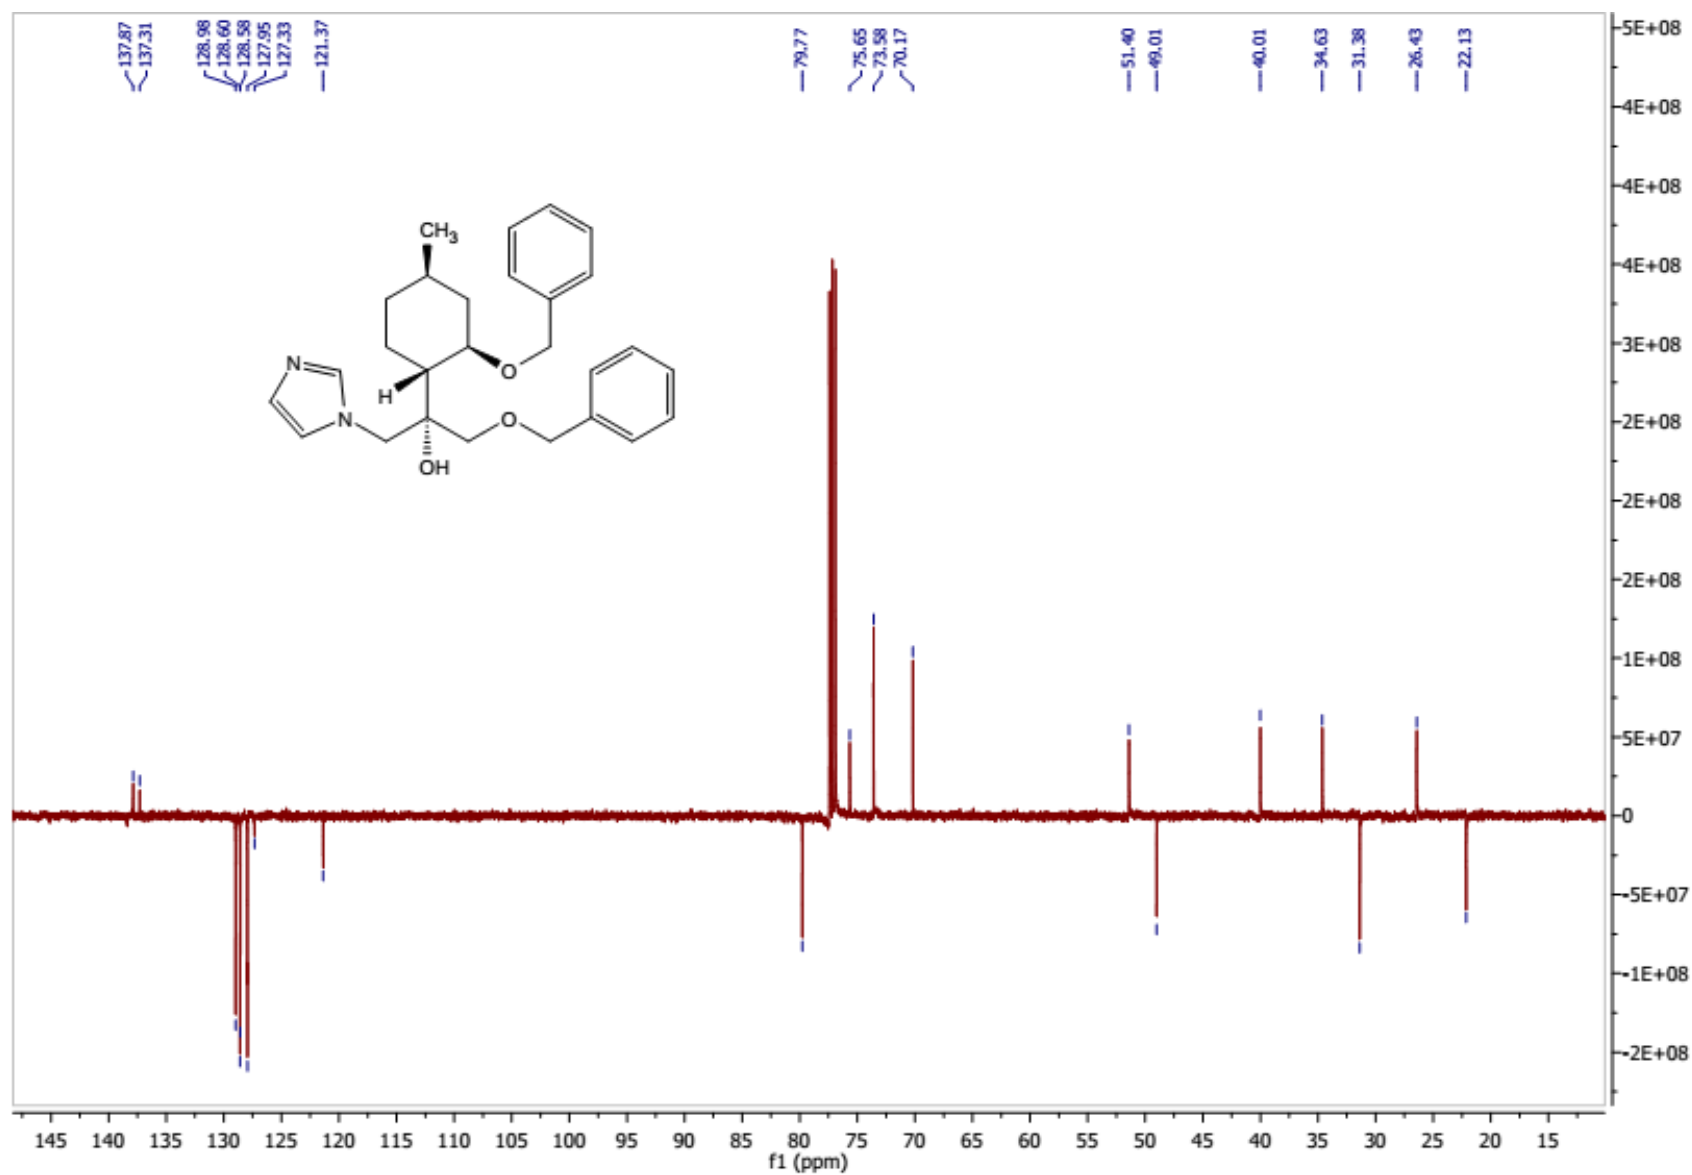

Figure S 111:  $^1\text{H}$ -NMR of compound **39b**

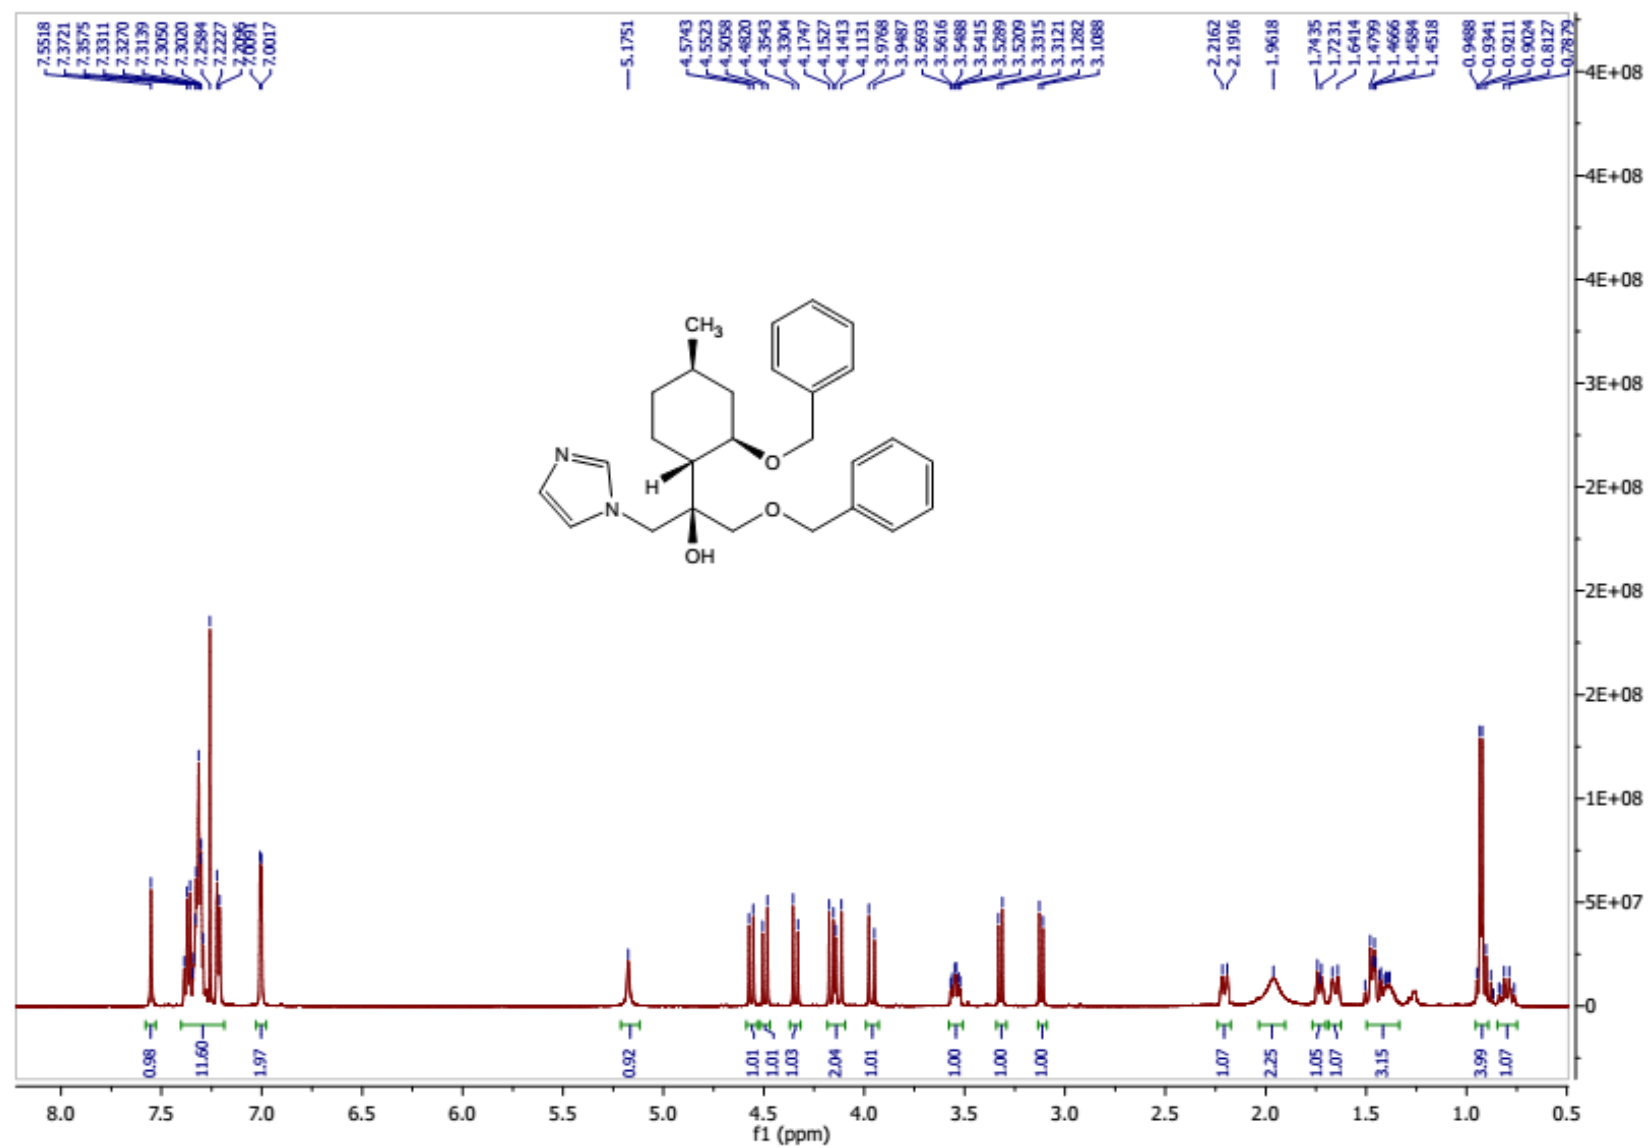

Figure S 112:  $^{13}\text{C}$ -NMR of compound **39b**

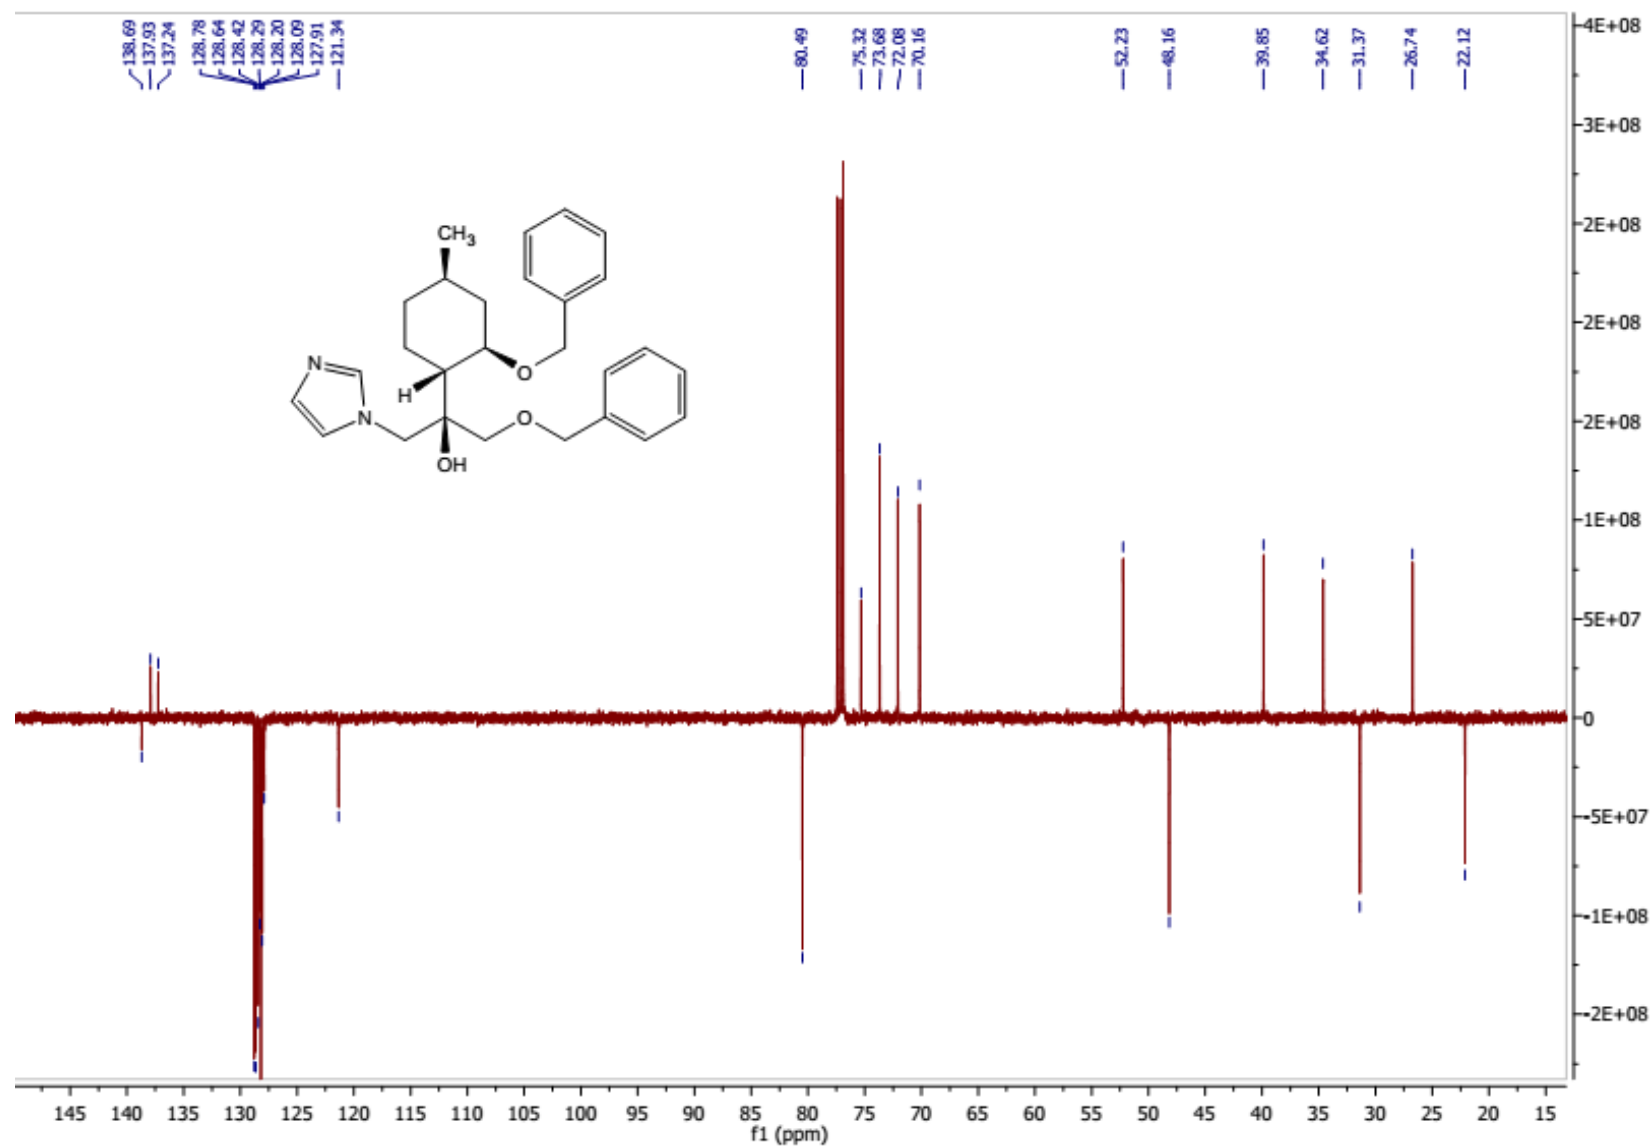



Figure S 113:  $^1\text{H}$ -NMR of compound 40a

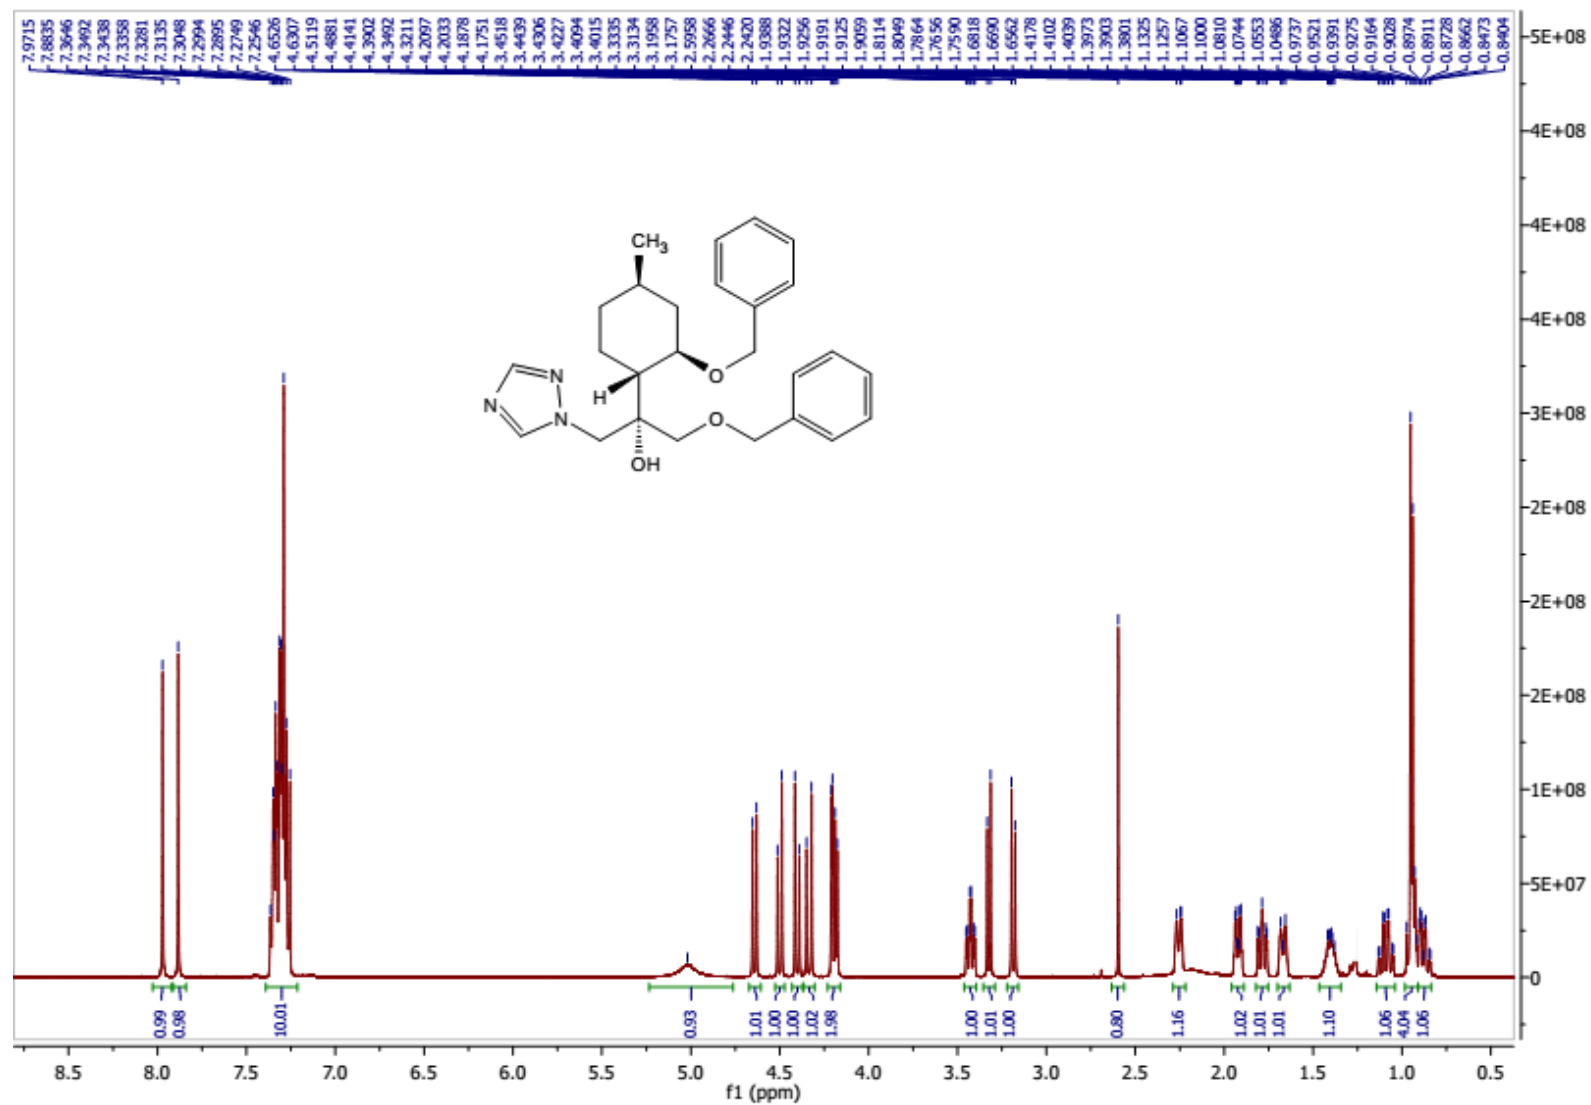

Figure S 114:  $^{13}\text{C}$ -NMR of compound **40a**

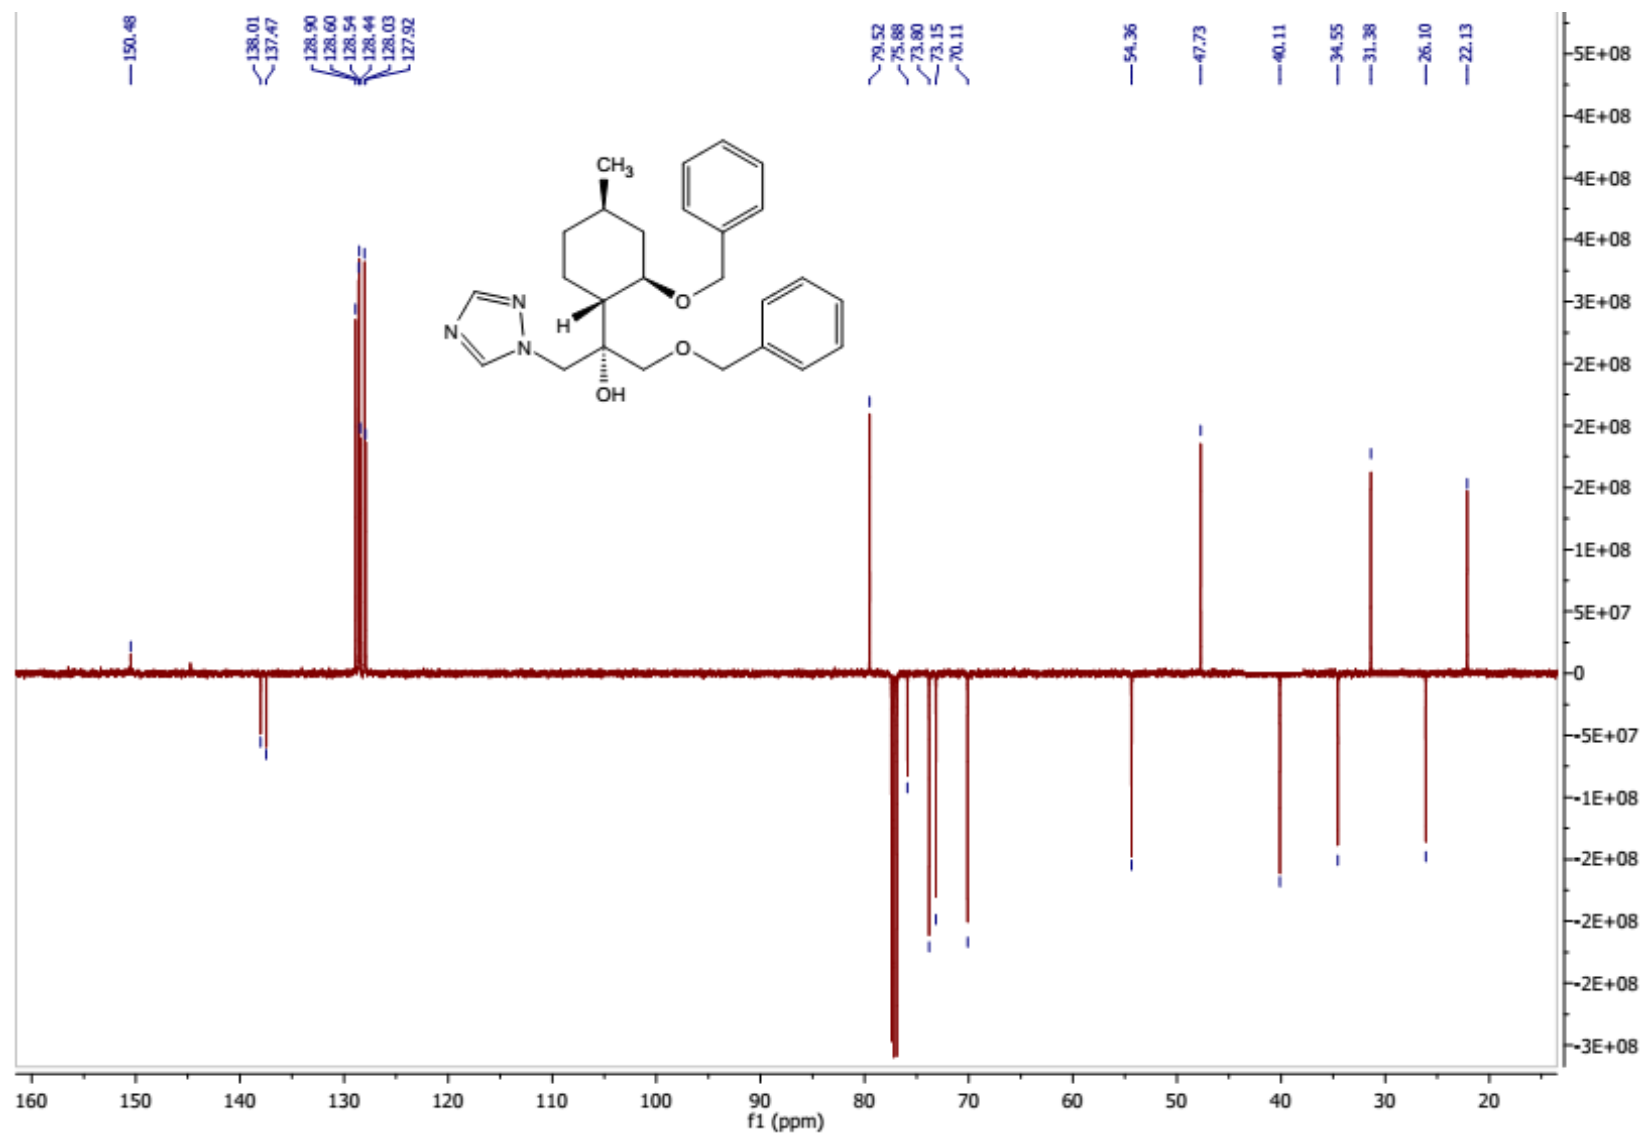

Figure S 115:  $^1\text{H}$ -NMR of compound **40b**

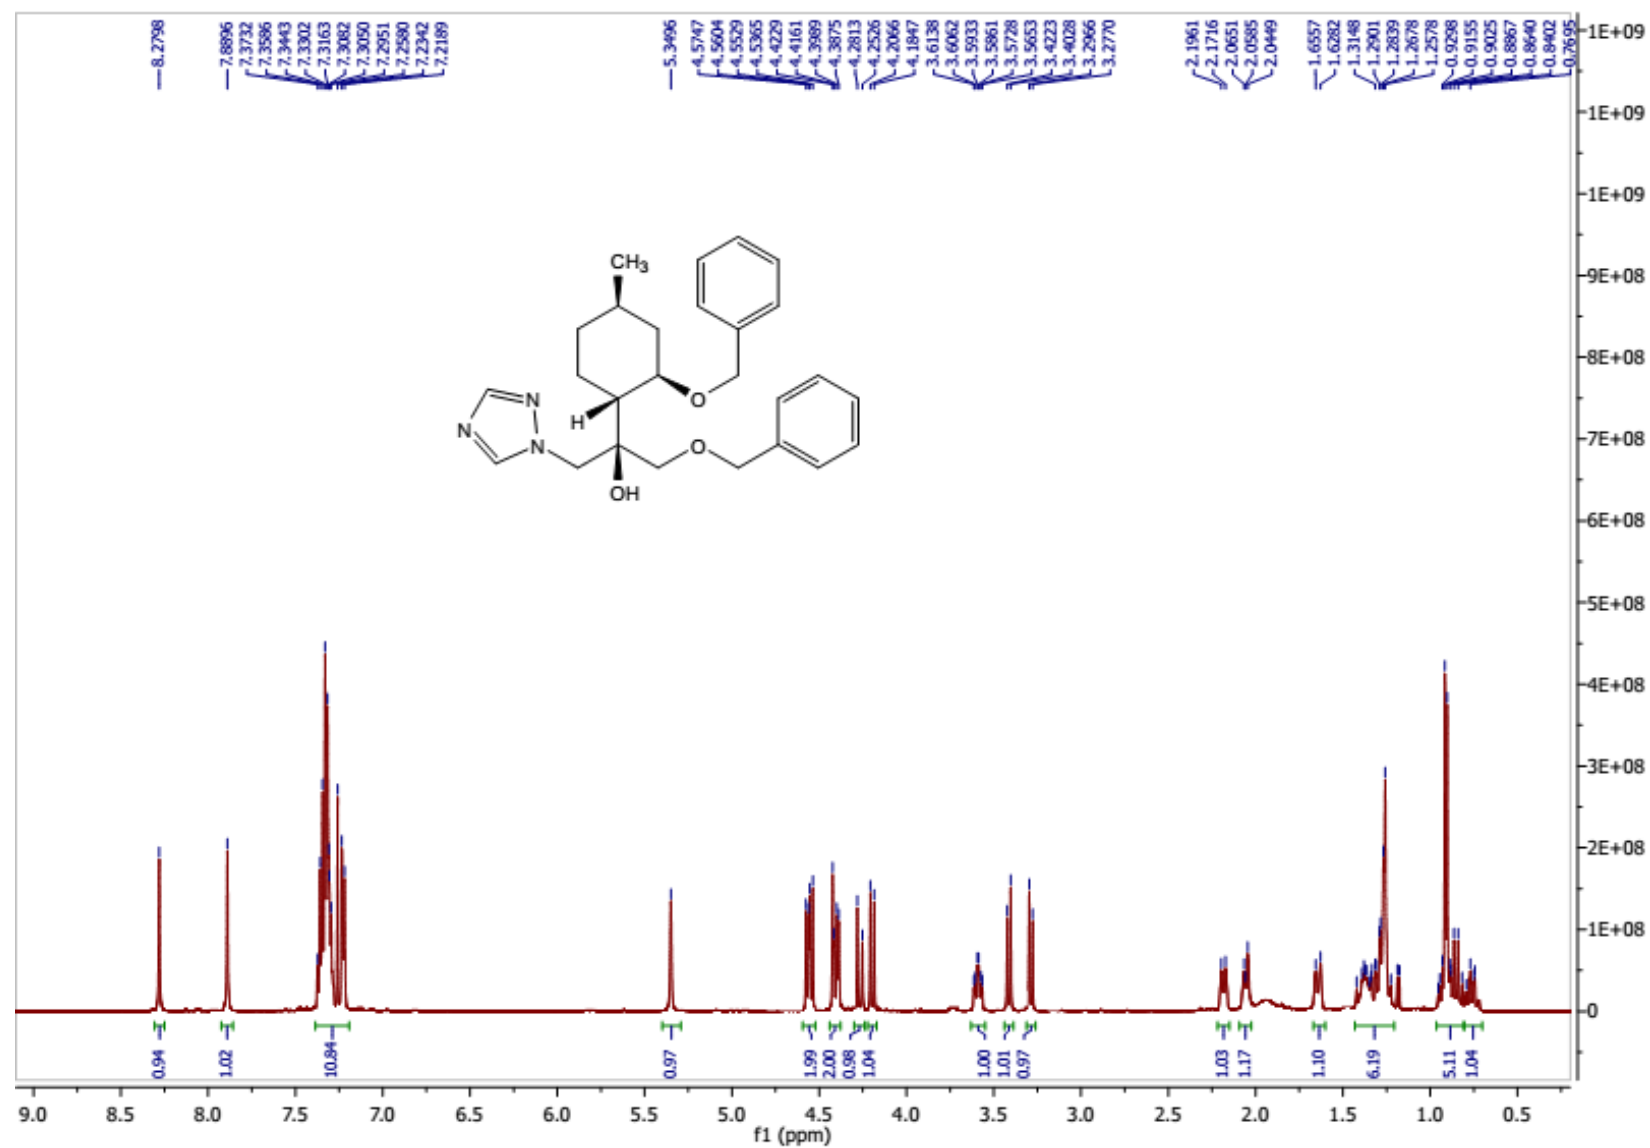

Figure S 116:  $^{13}\text{C}$ -NMR of compound **40b**

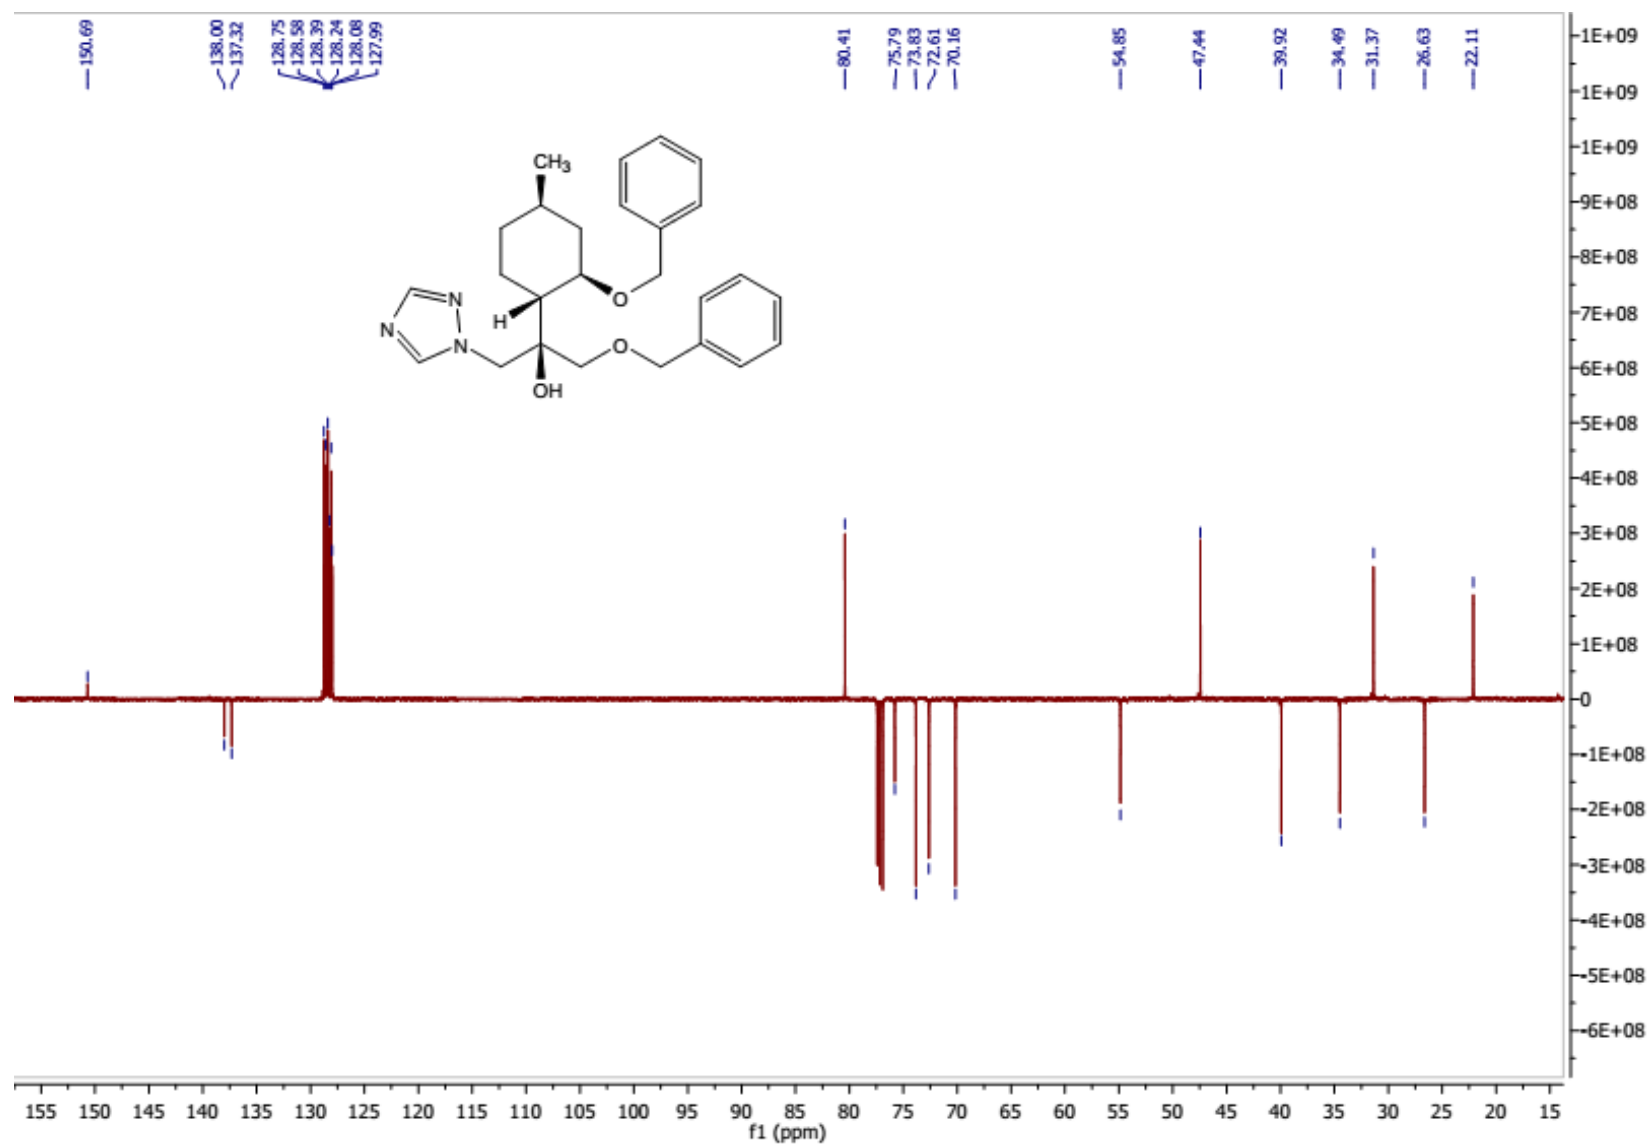

Figure S 117:  $^1\text{H}$ -NMR of compound **41a**

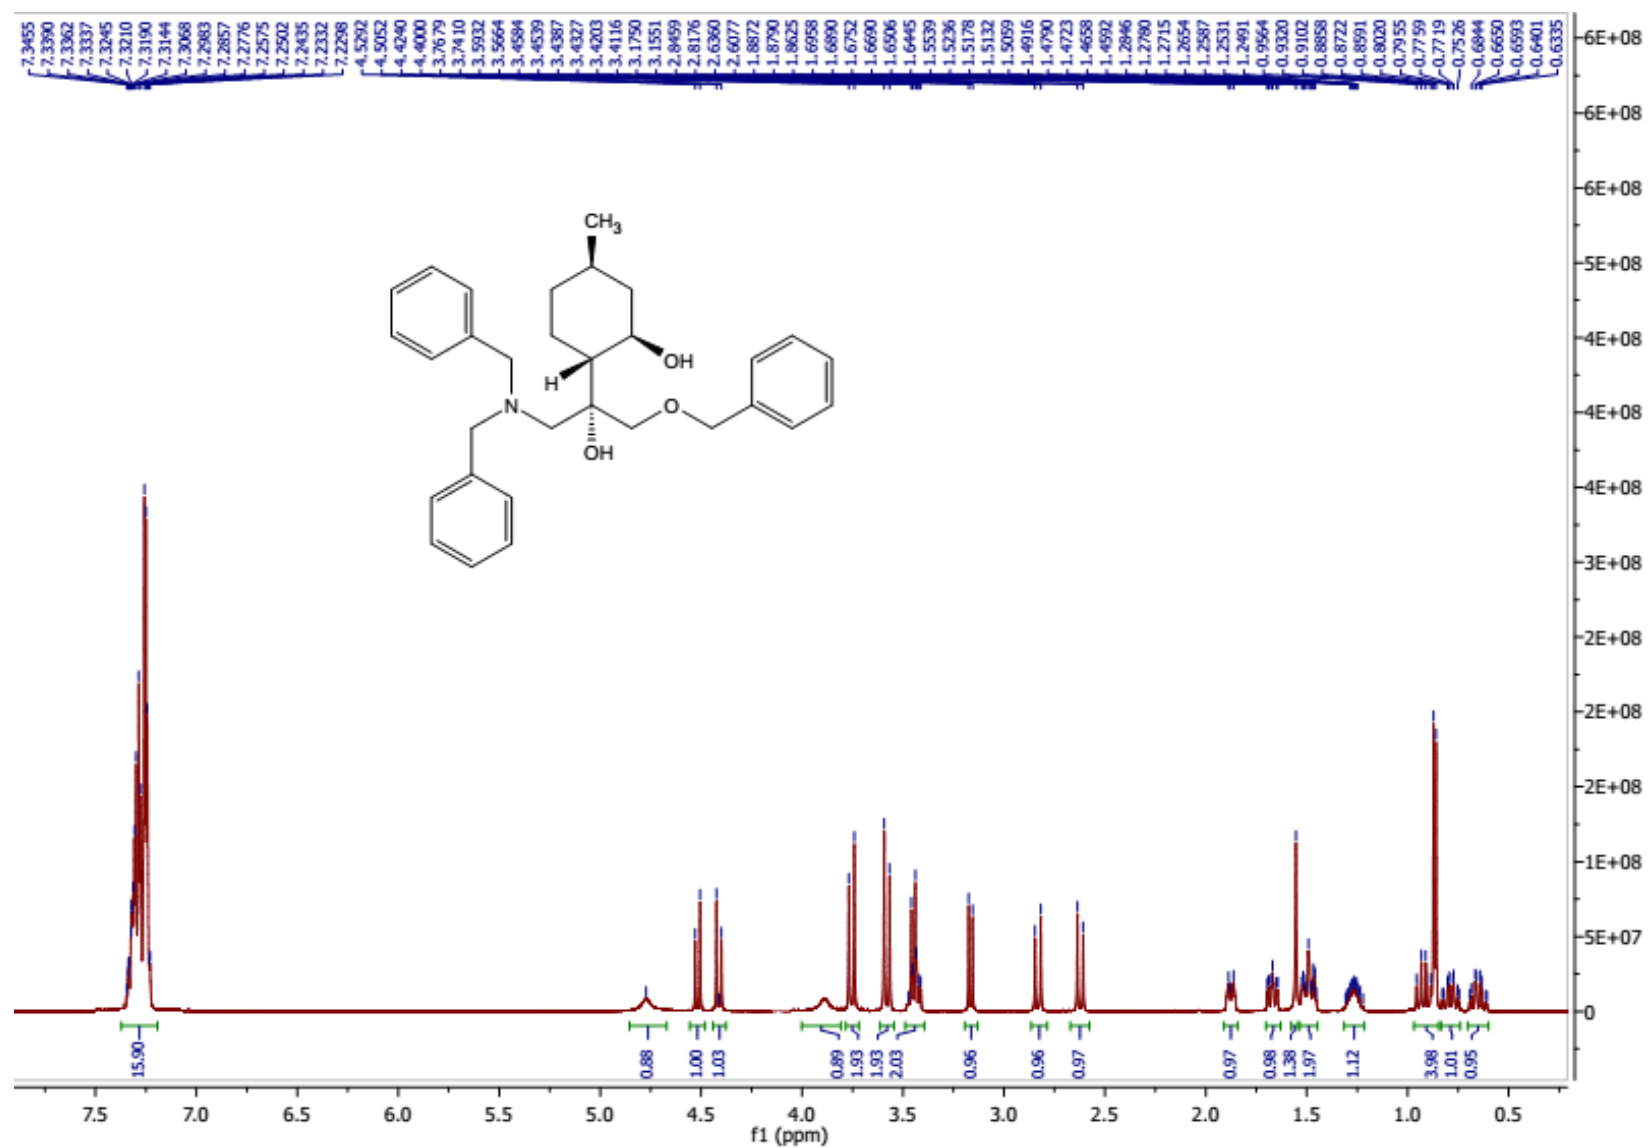

Figure S 118:  $^{13}\text{C}$ -NMR of compound **41a**

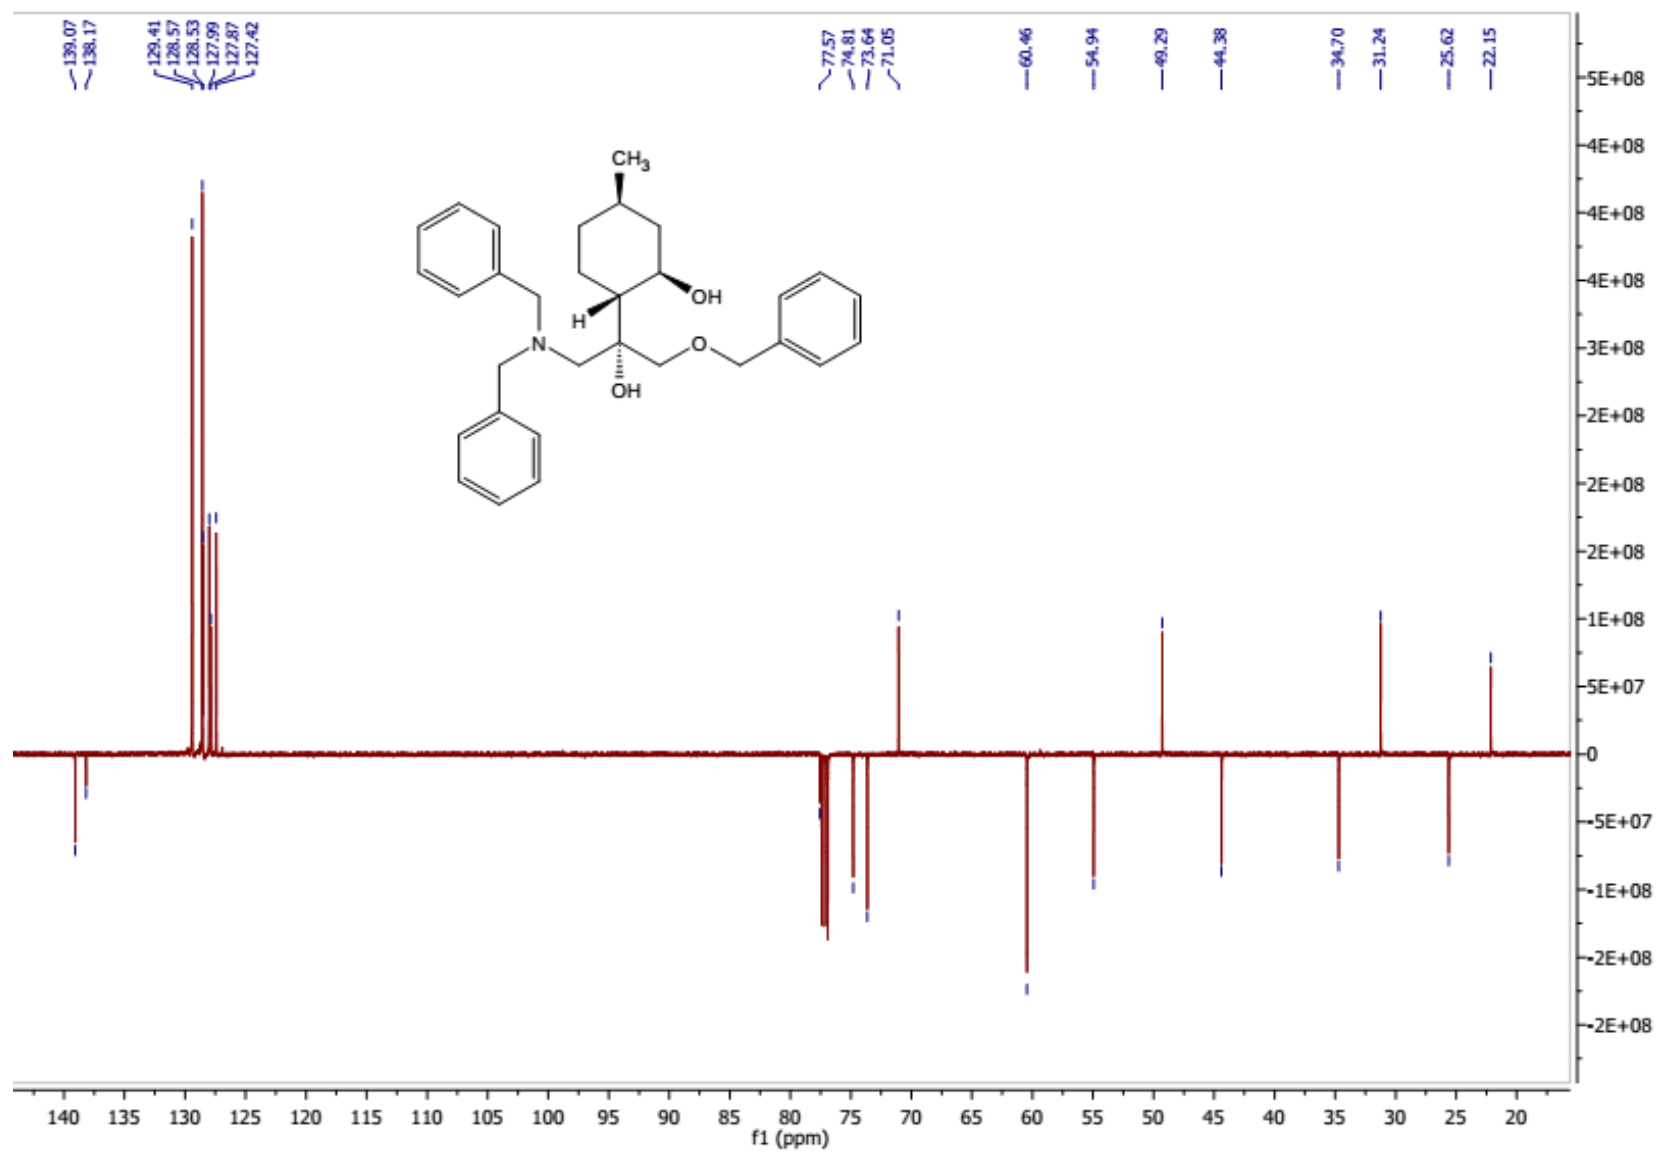

Figure S 119:  $^1\text{H}$ -NMR of compound **41b**

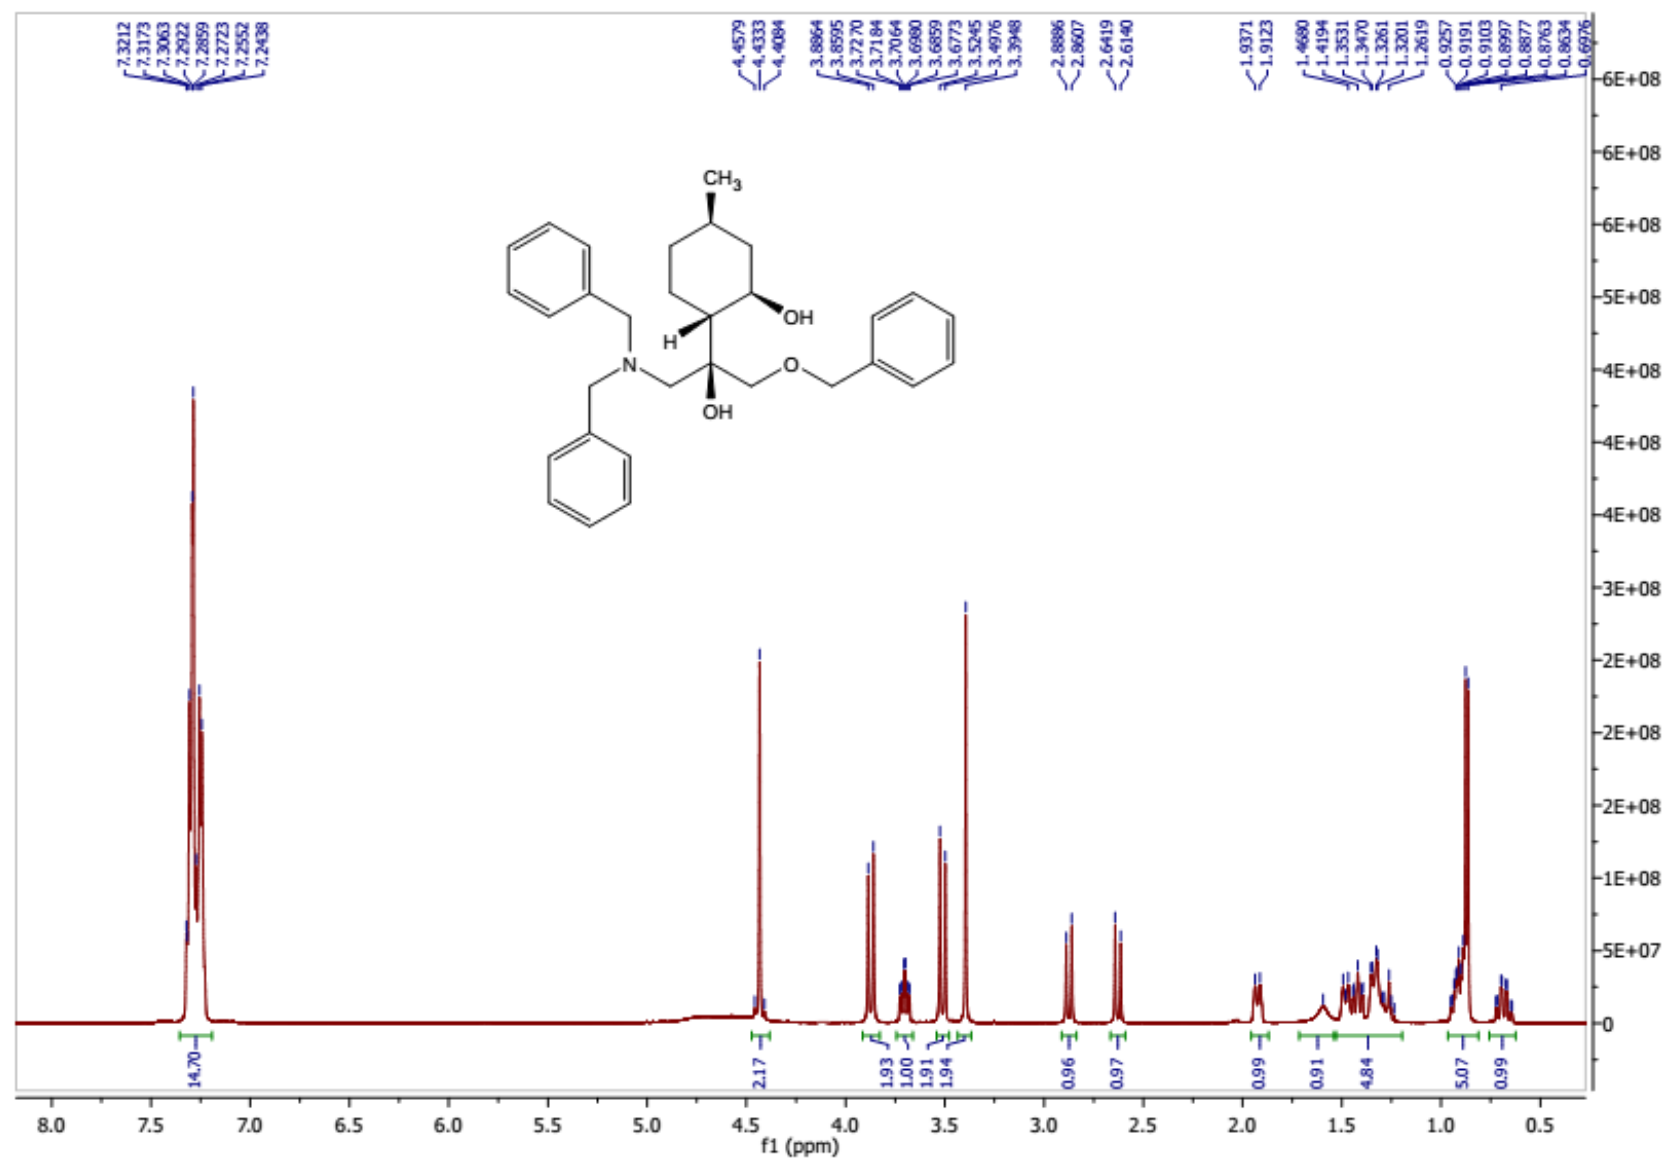

Figure S 120:  $^{13}\text{C}$ -NMR of compound **41b**

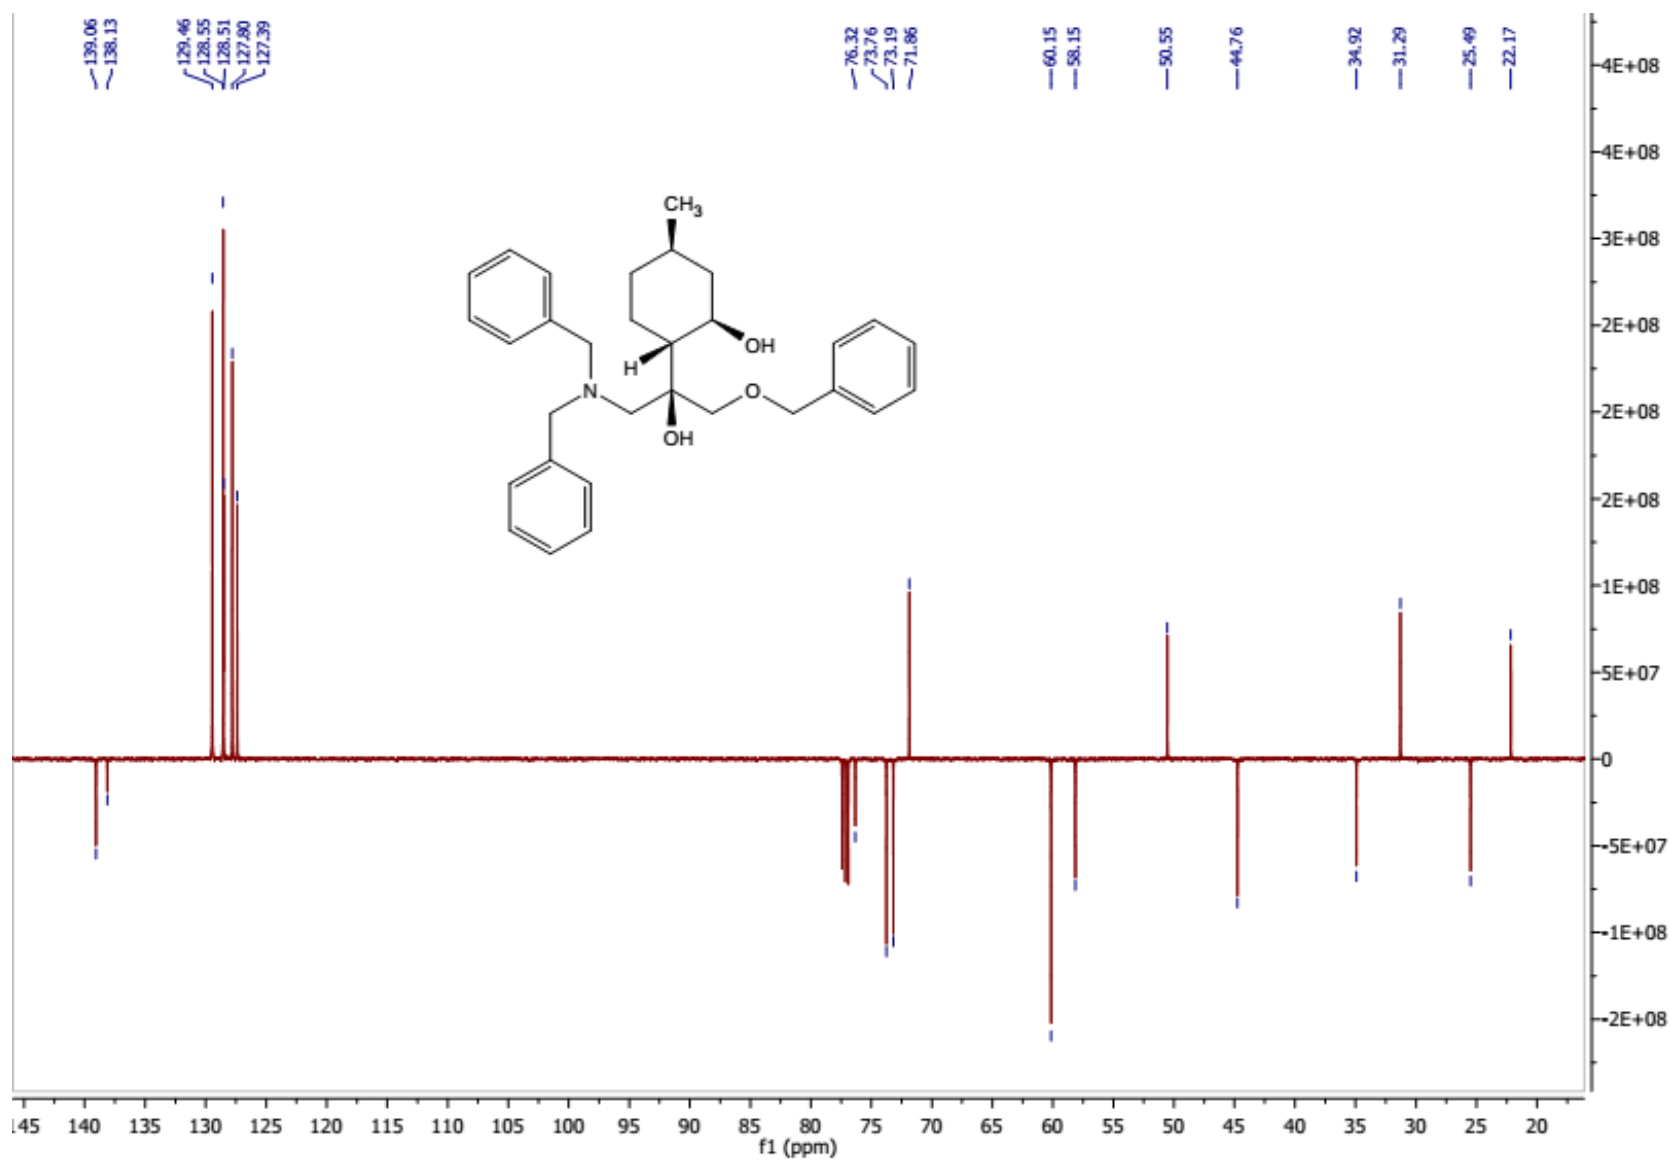



Figure S 121:  $^1\text{H}$ -NMR of compound **42a**

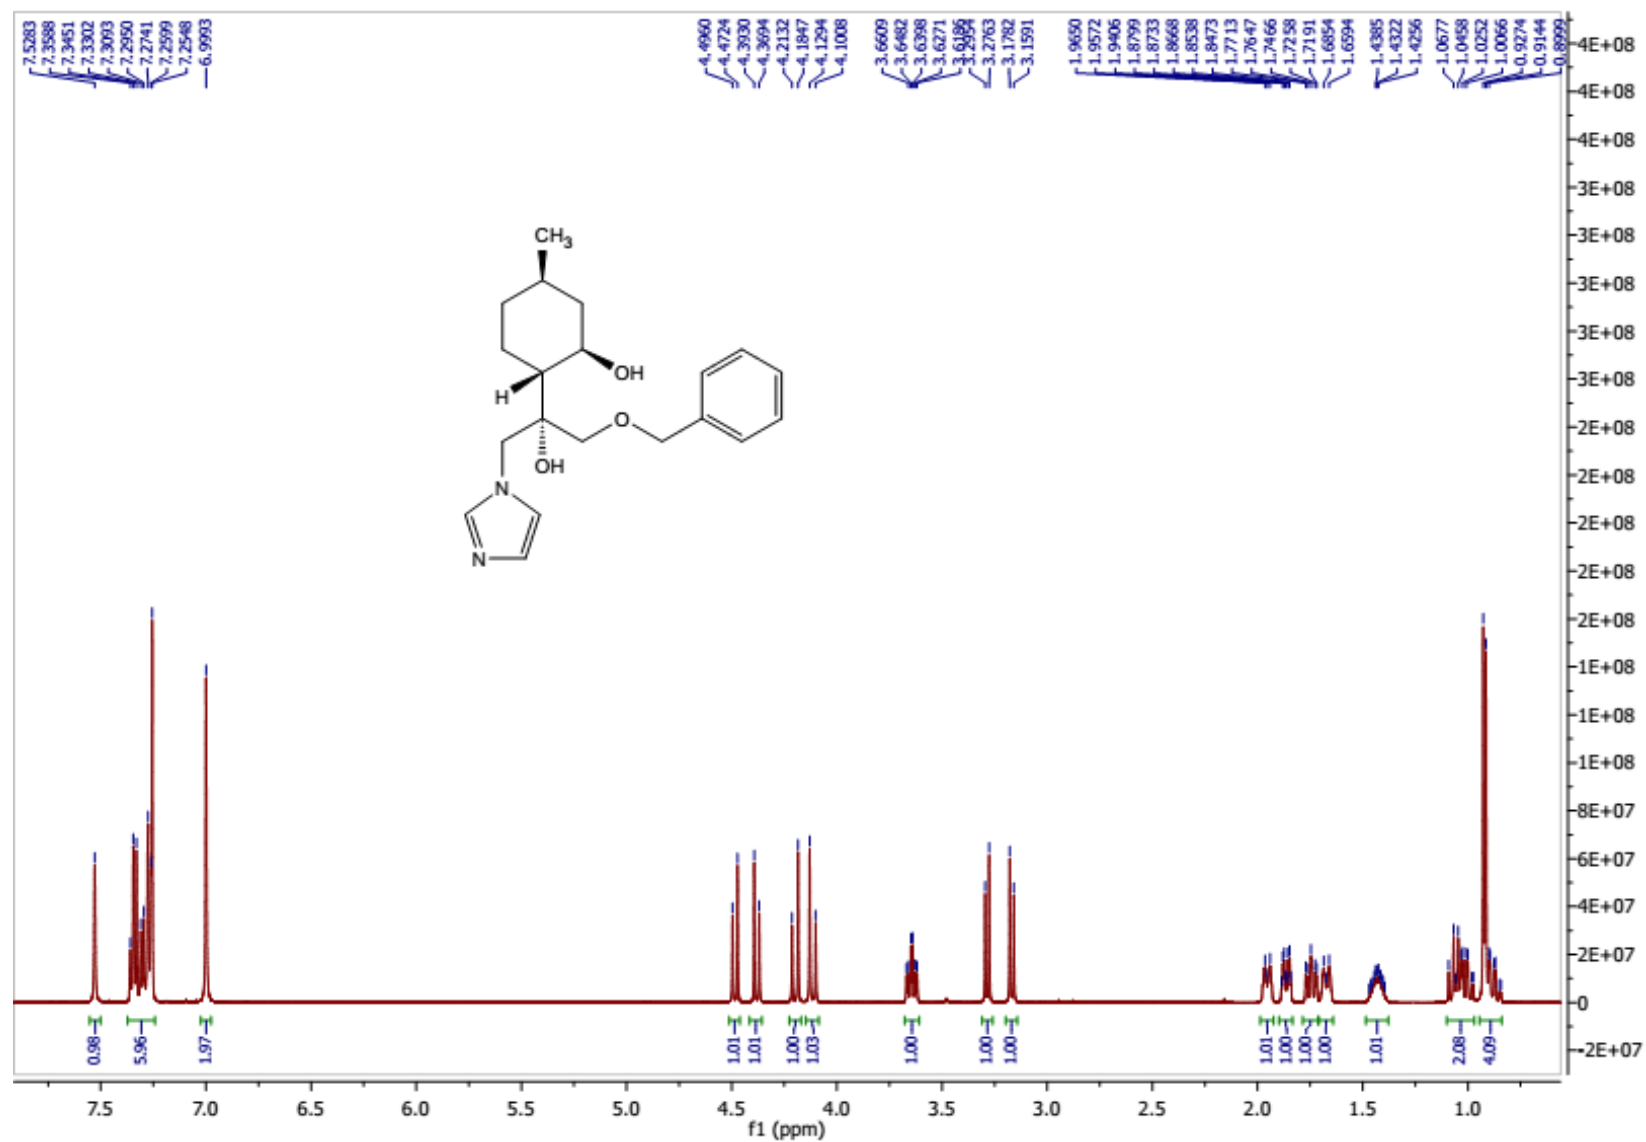

Figure S 122:  $^{13}\text{C}$ -NMR of compound **42a**

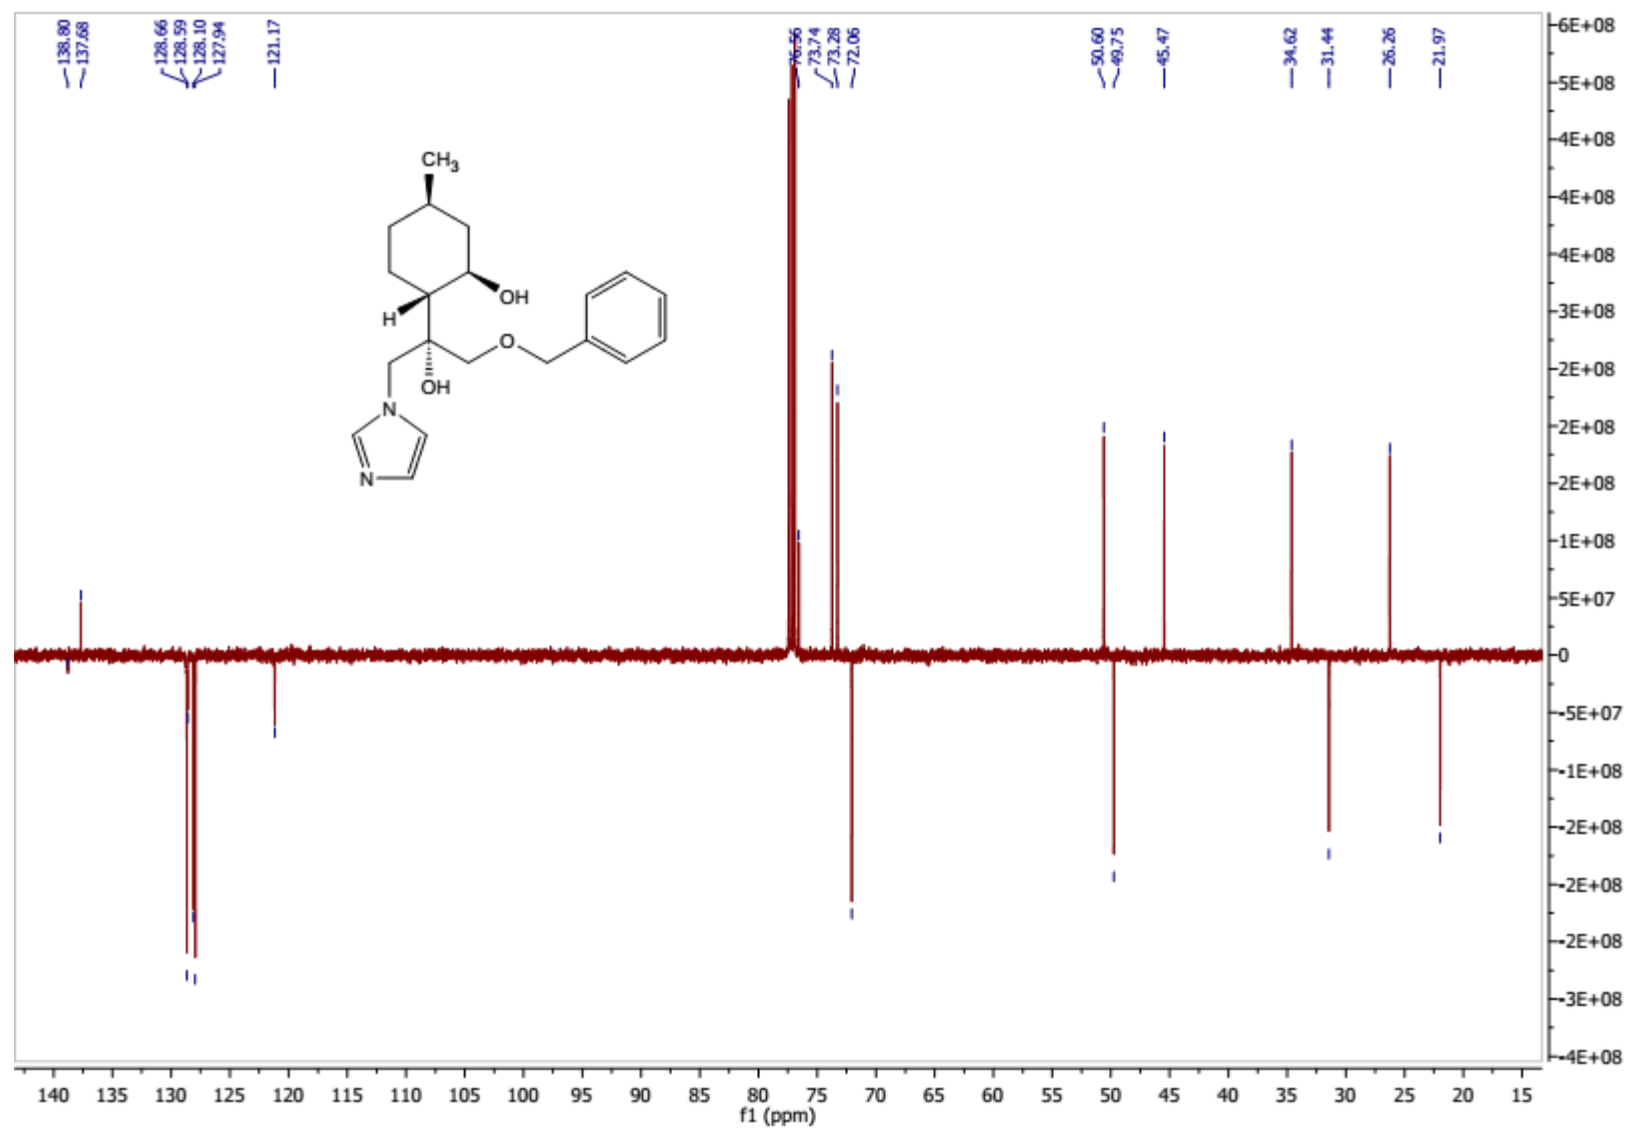

Figure S 123:  $^1\text{H}$ -NMR of compound **42b**

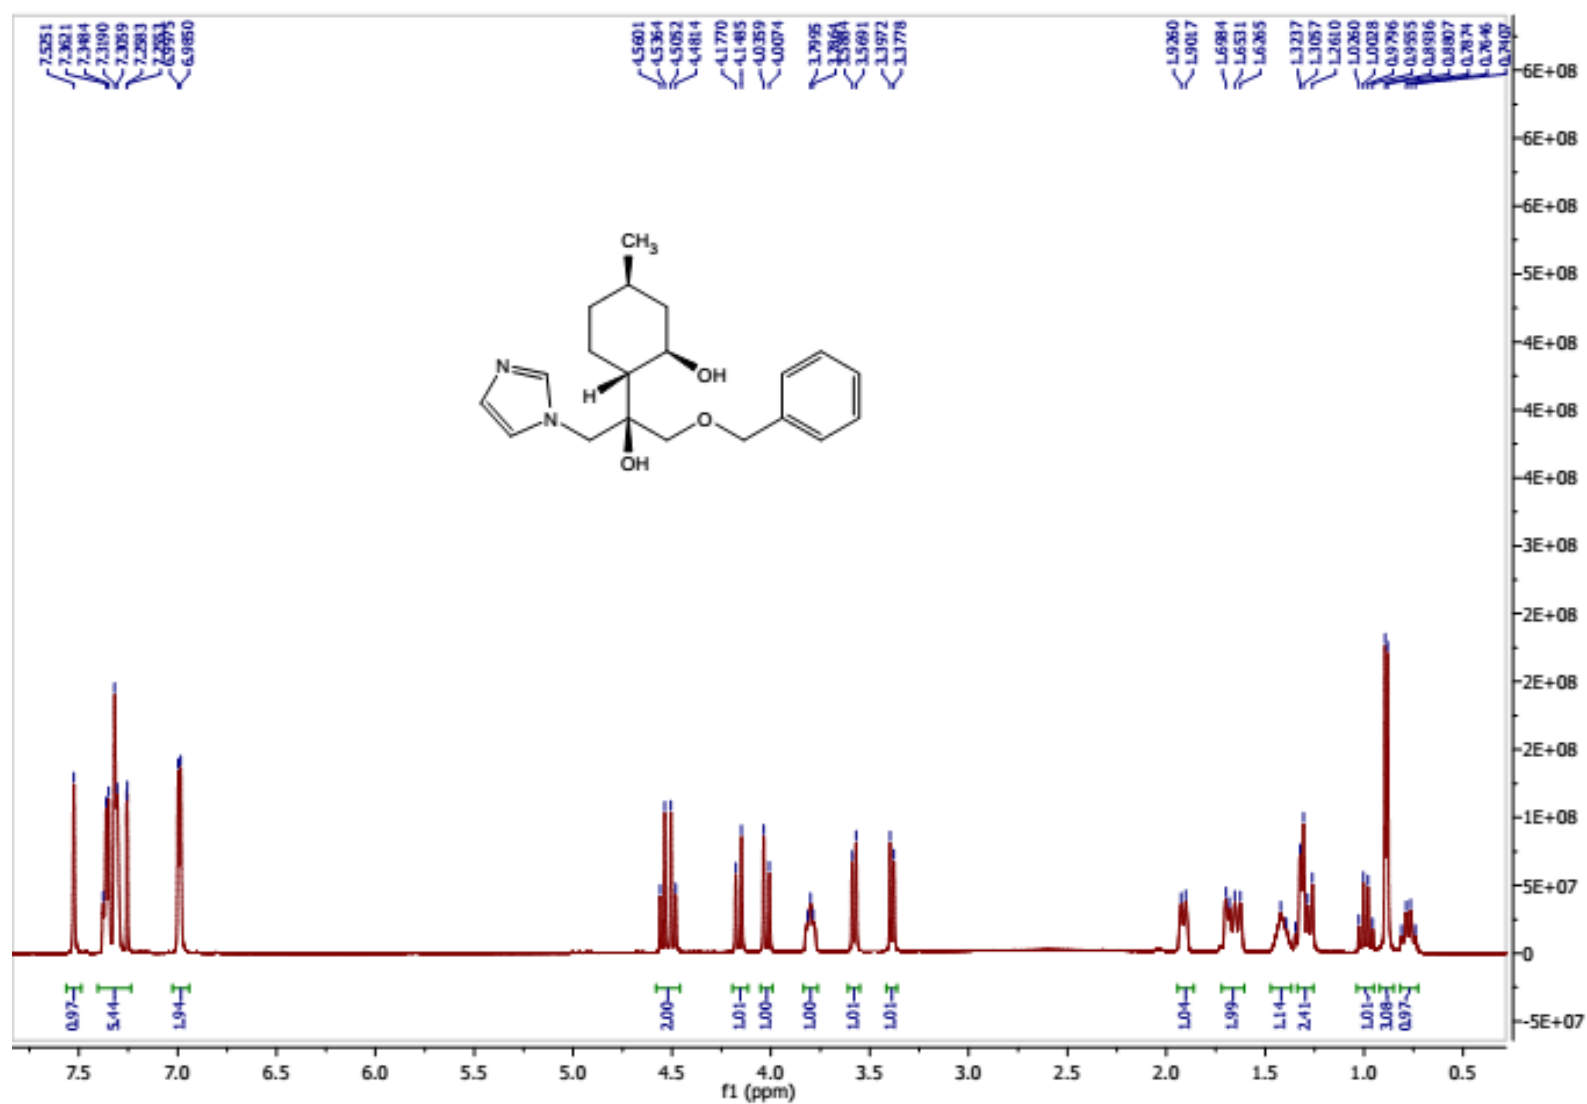

Figure S 124:  $^{13}\text{C}$ -NMR of compound **42b**

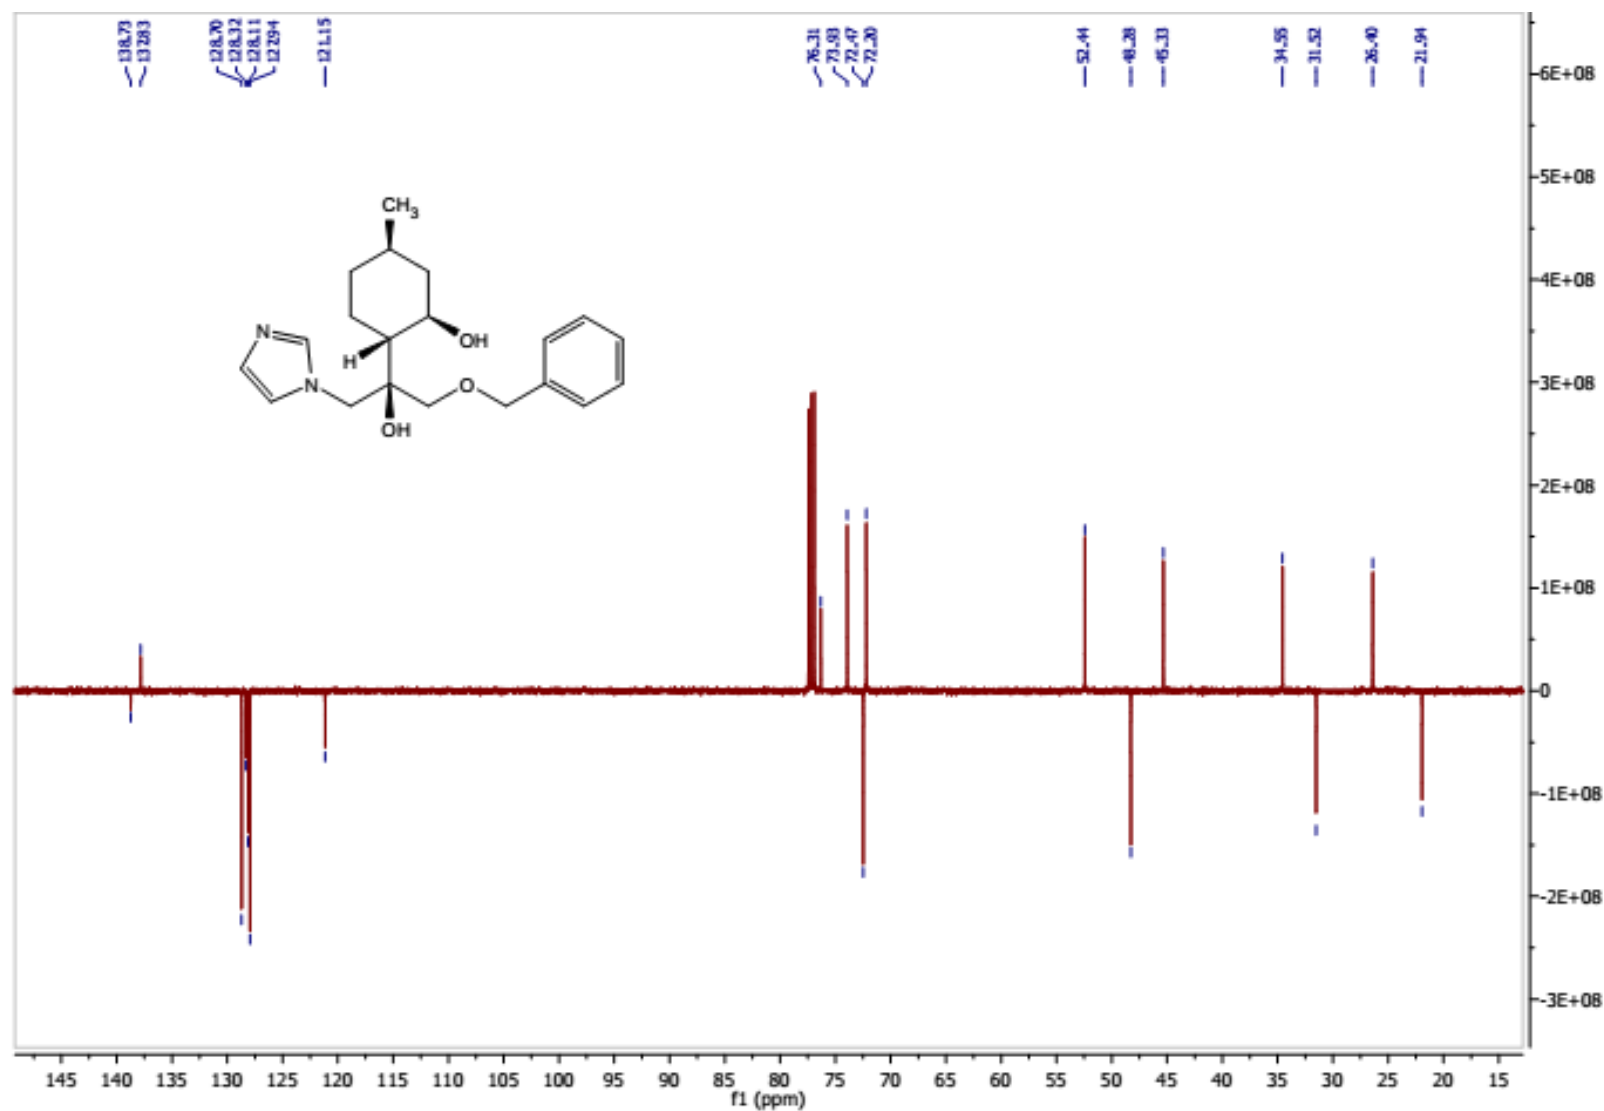

Figure S 125:  $^1\text{H}$ -NMR of compound **43a**

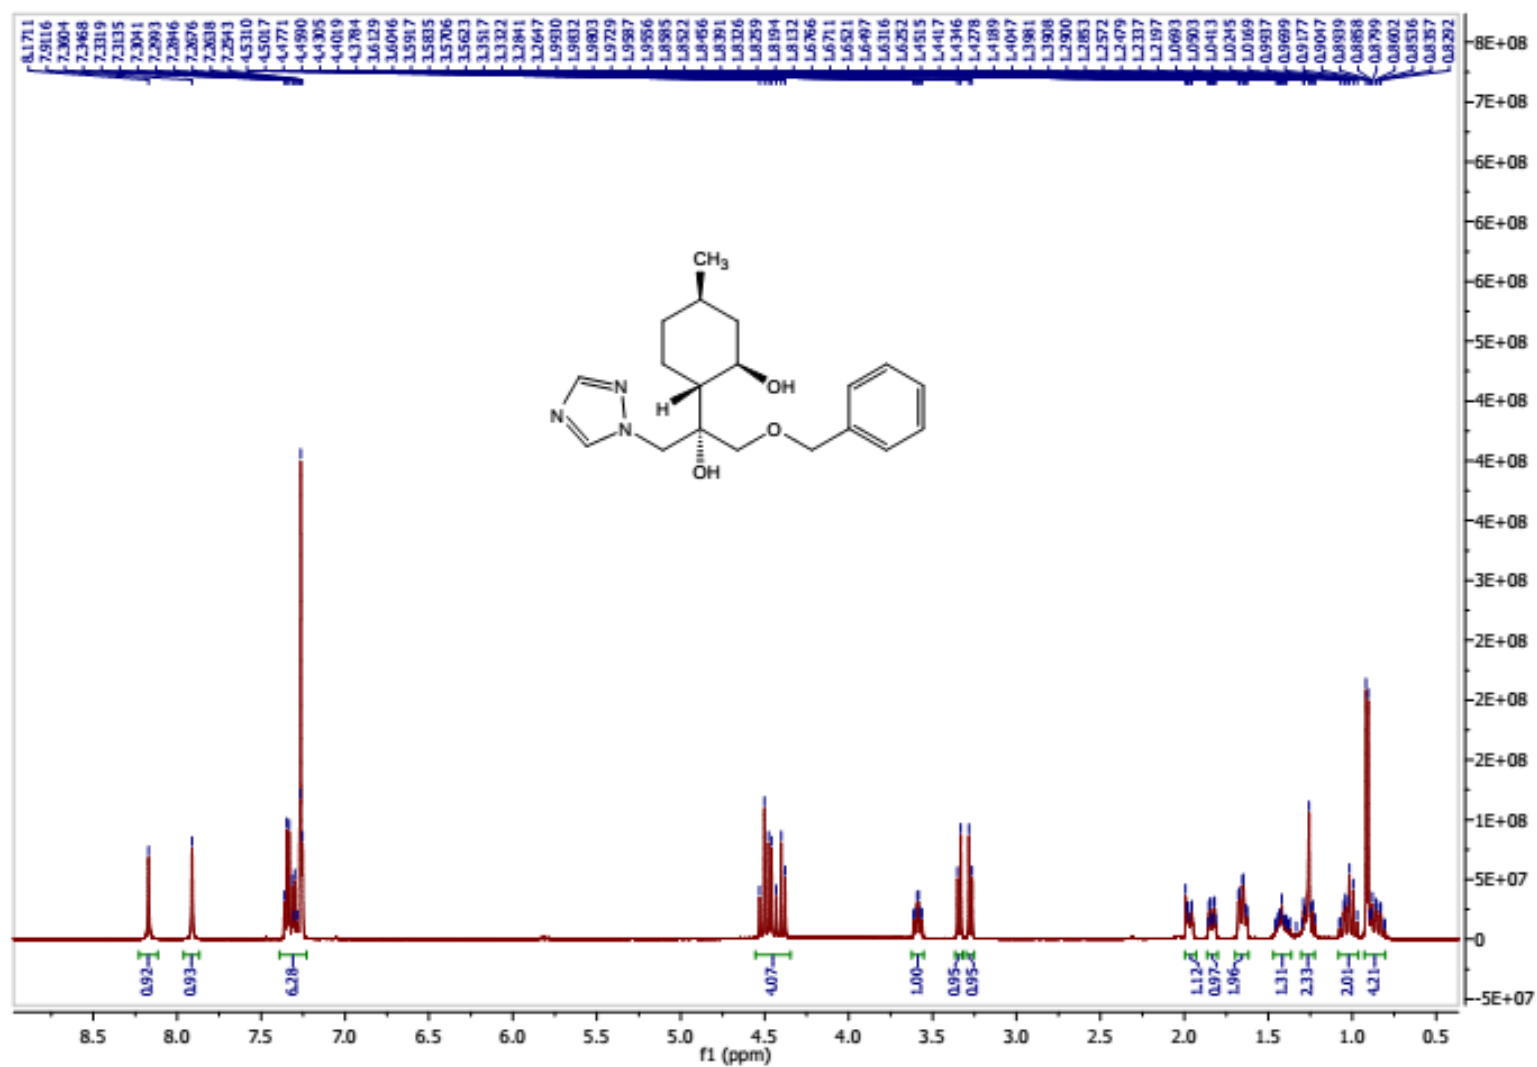

Figure S 126:  $^{13}\text{C}$ -NMR of compound **43a**

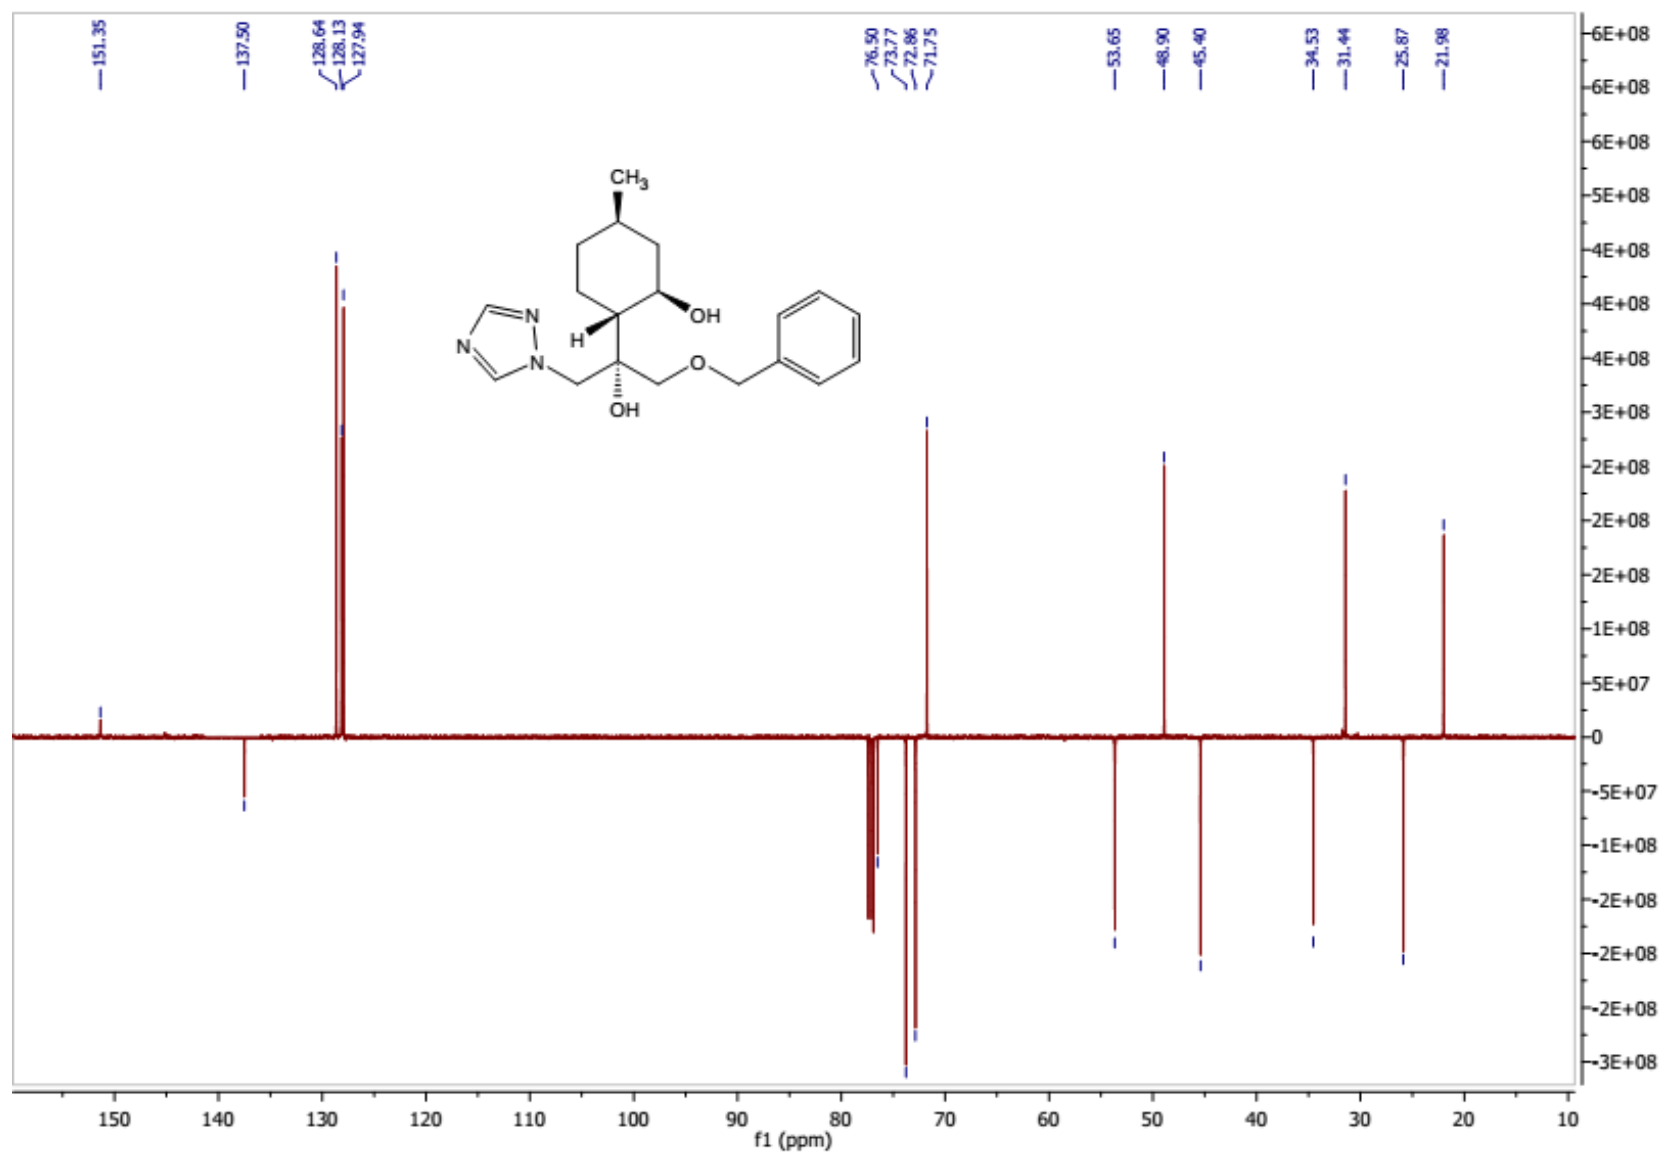

Figure S 127:  $^1\text{H}$ -NMR of compound **43b**

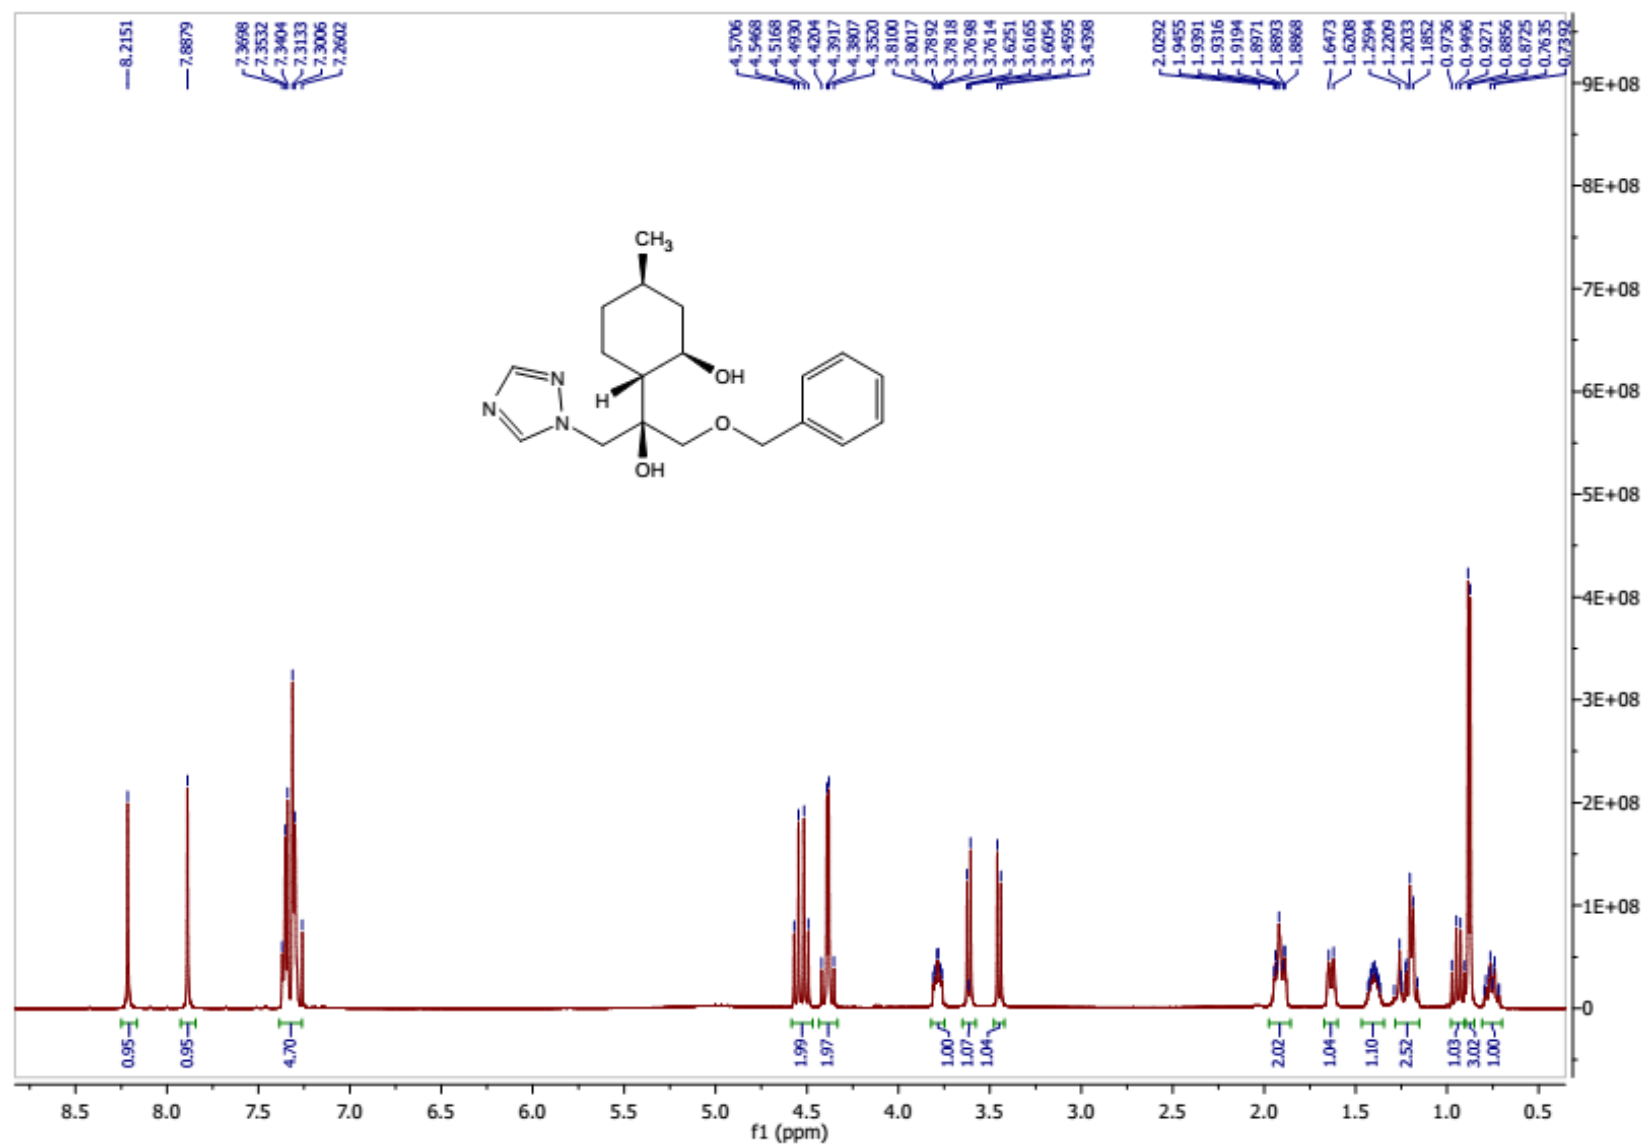

$^{13}\text{C}$ -NMR of compound **43b**

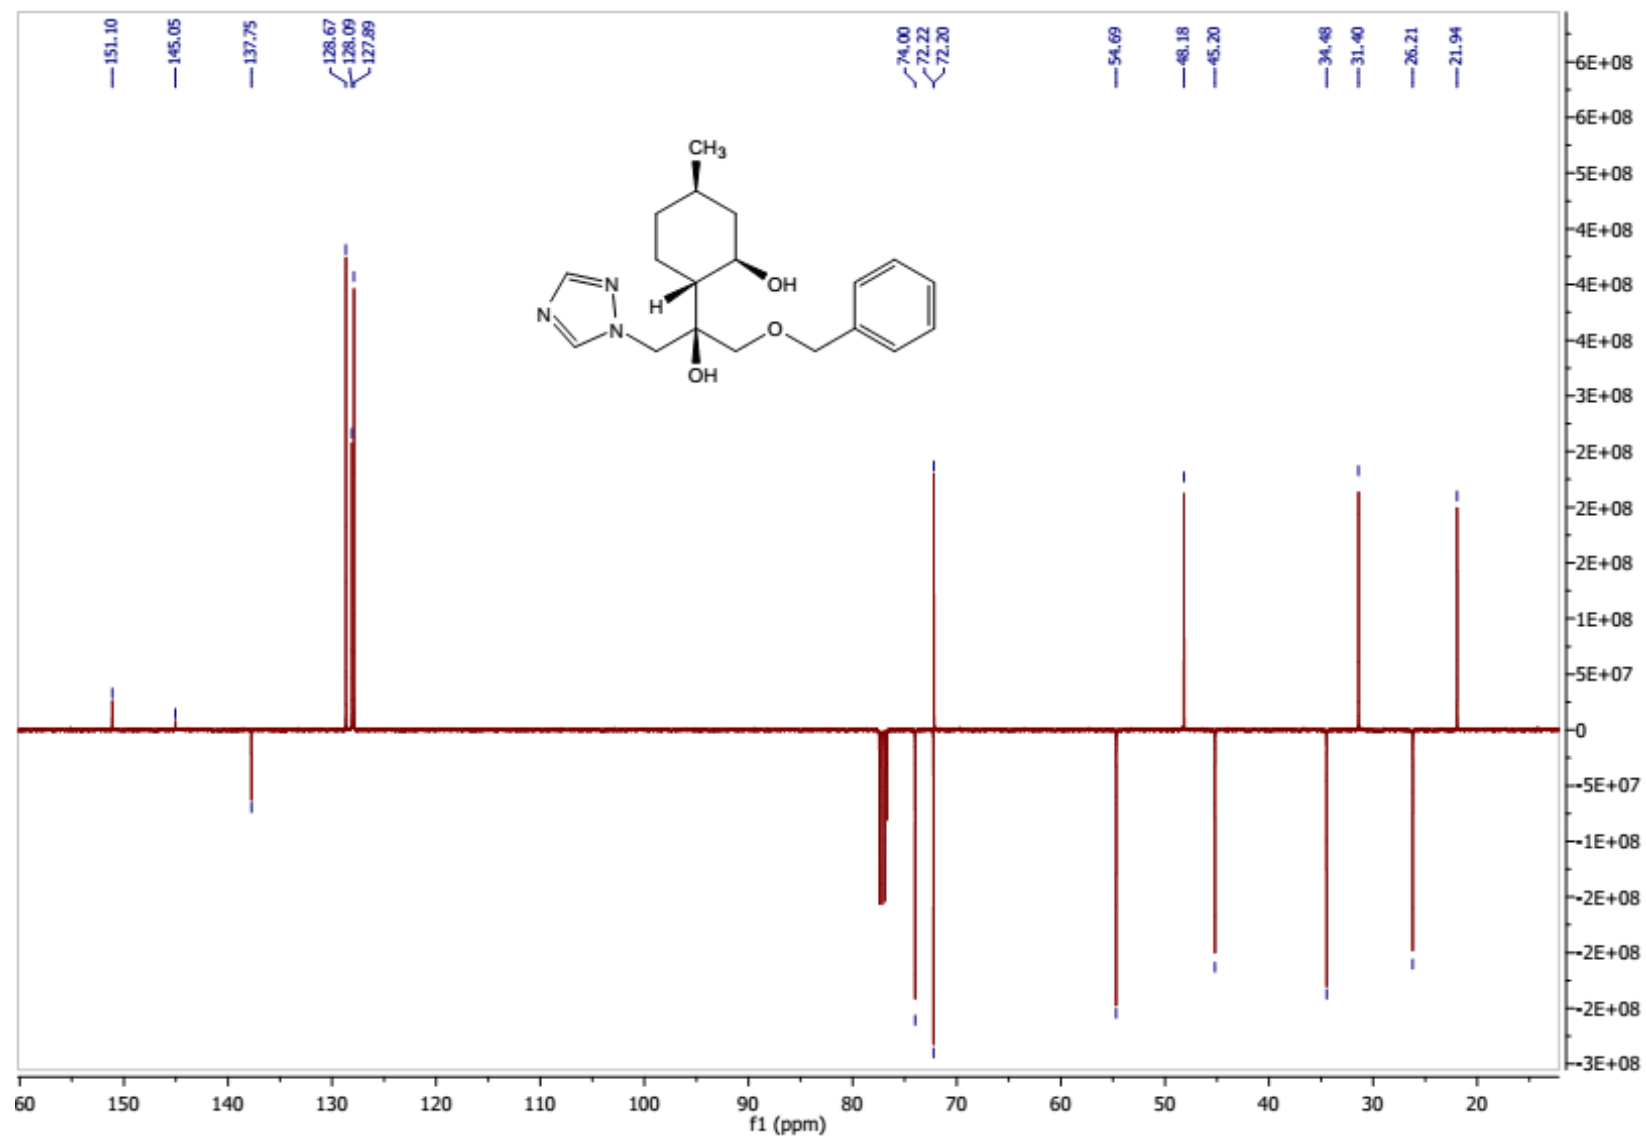



Figure S 128:  $^1\text{H}$ -NMR of compound **44**

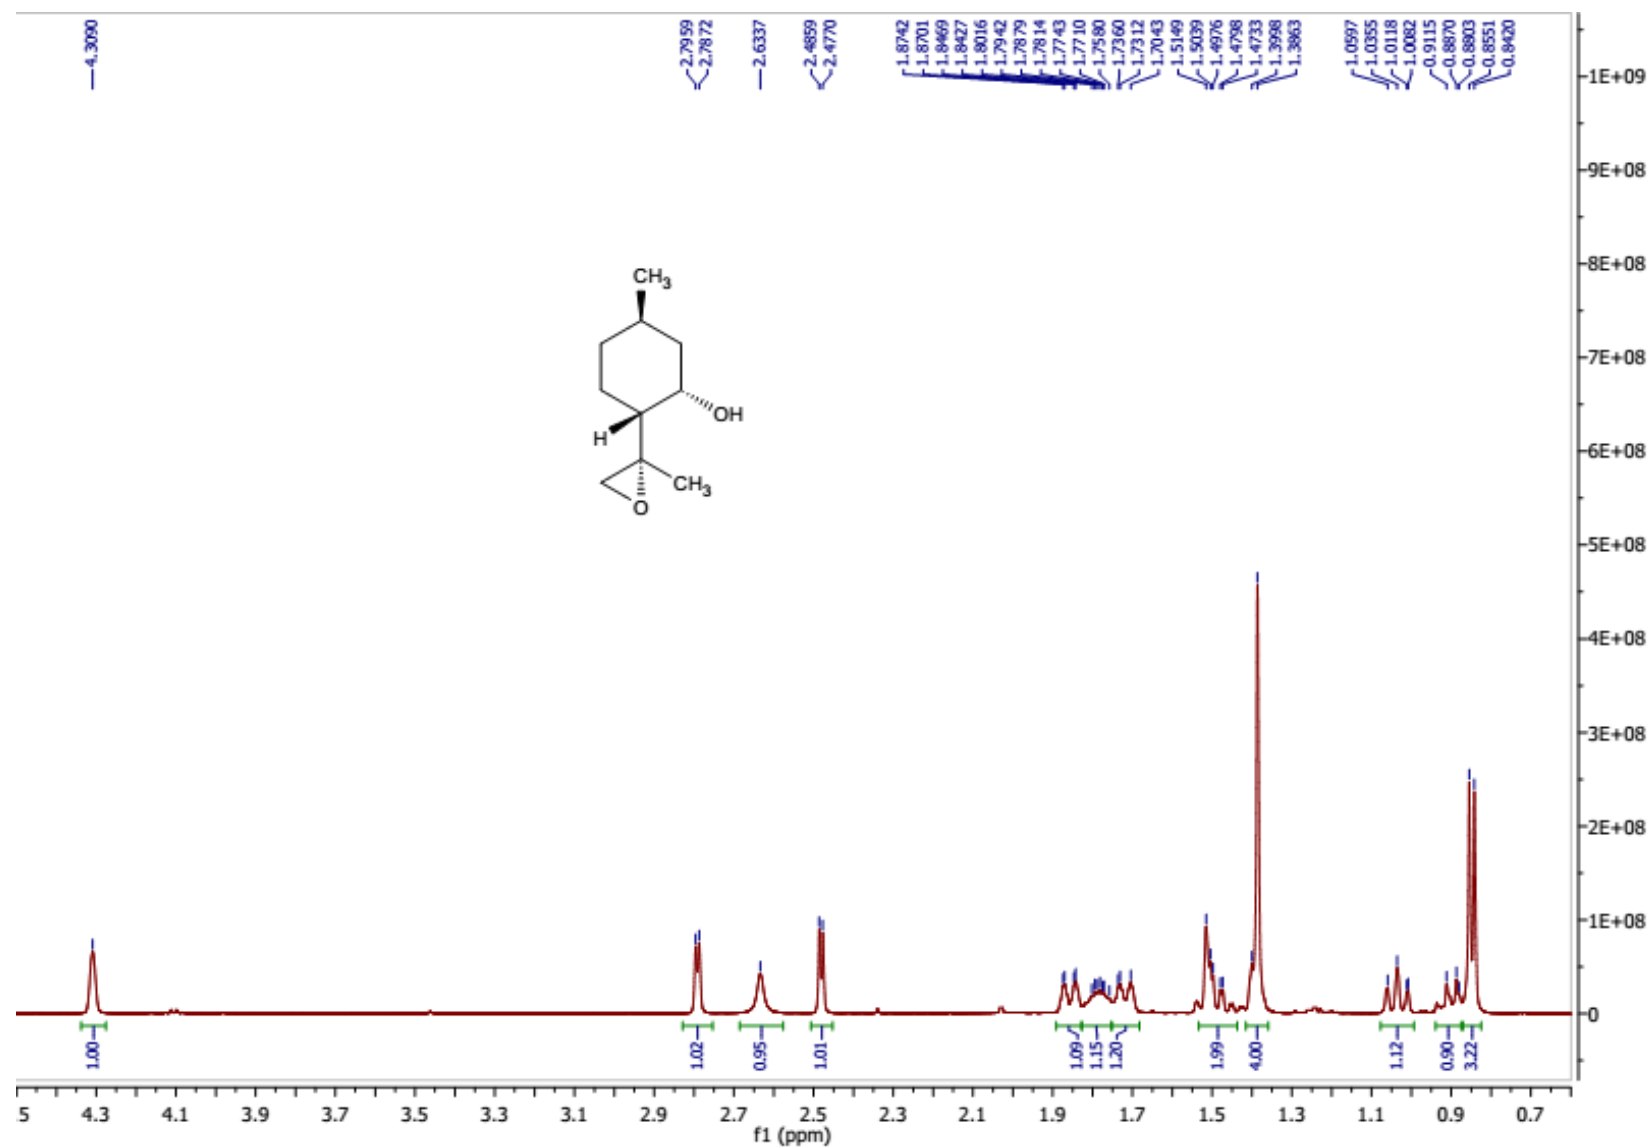

Figure S 129:  $^{13}\text{C}$ -NMR of compound **44**

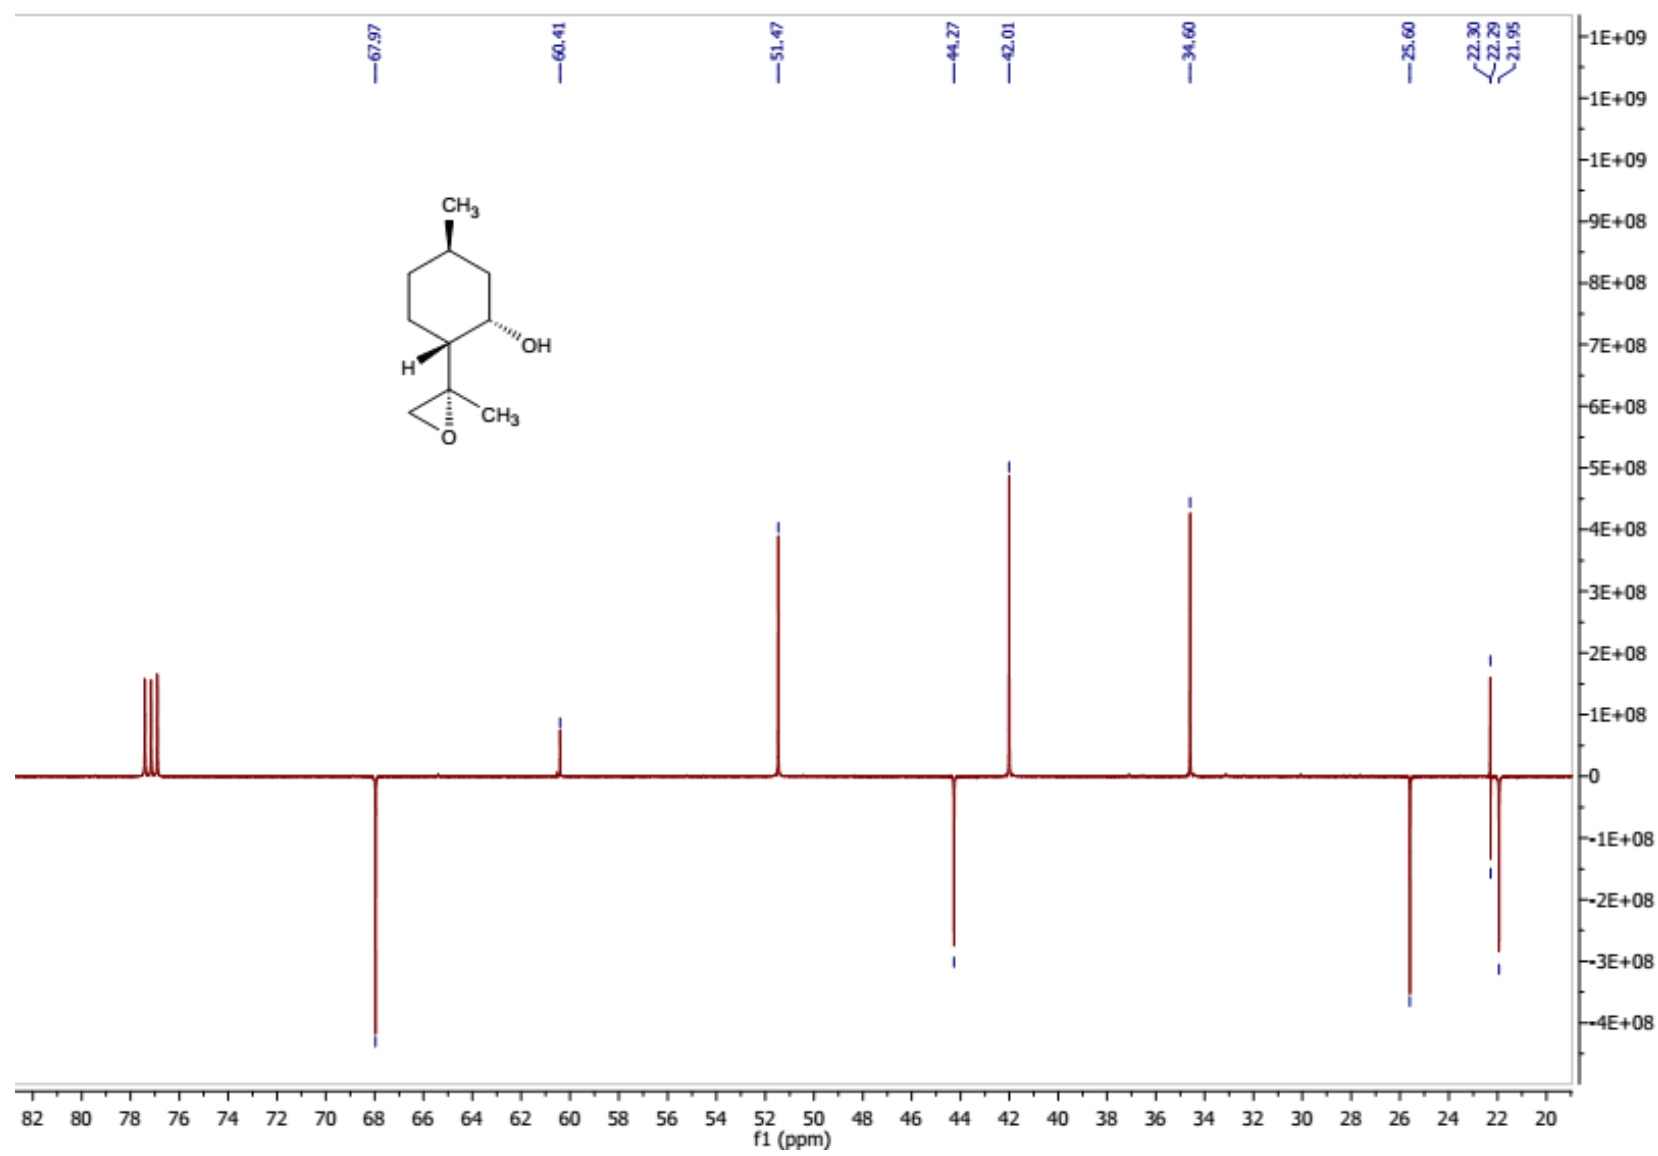

Figure S 130:  $^1\text{H}$ -NMR of compound **45**

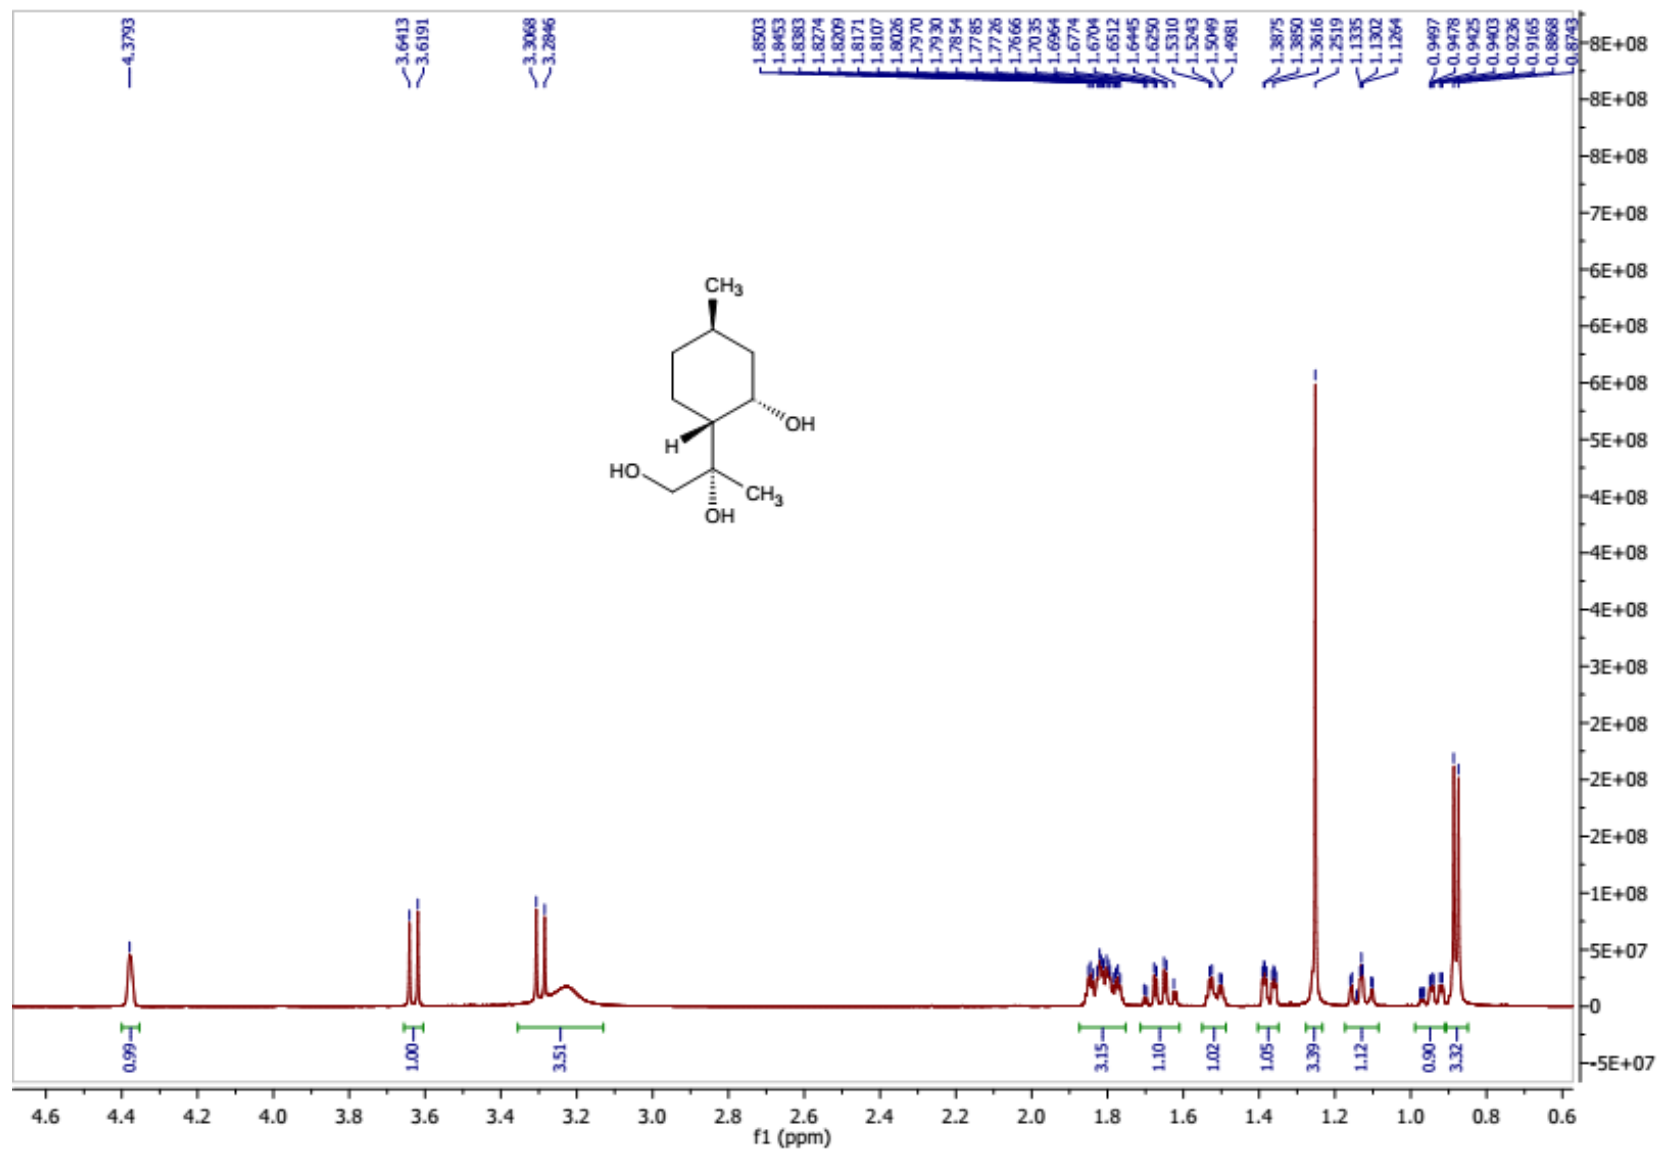

Figure S 131:  $^{13}\text{C}$ -NMR of compound 45

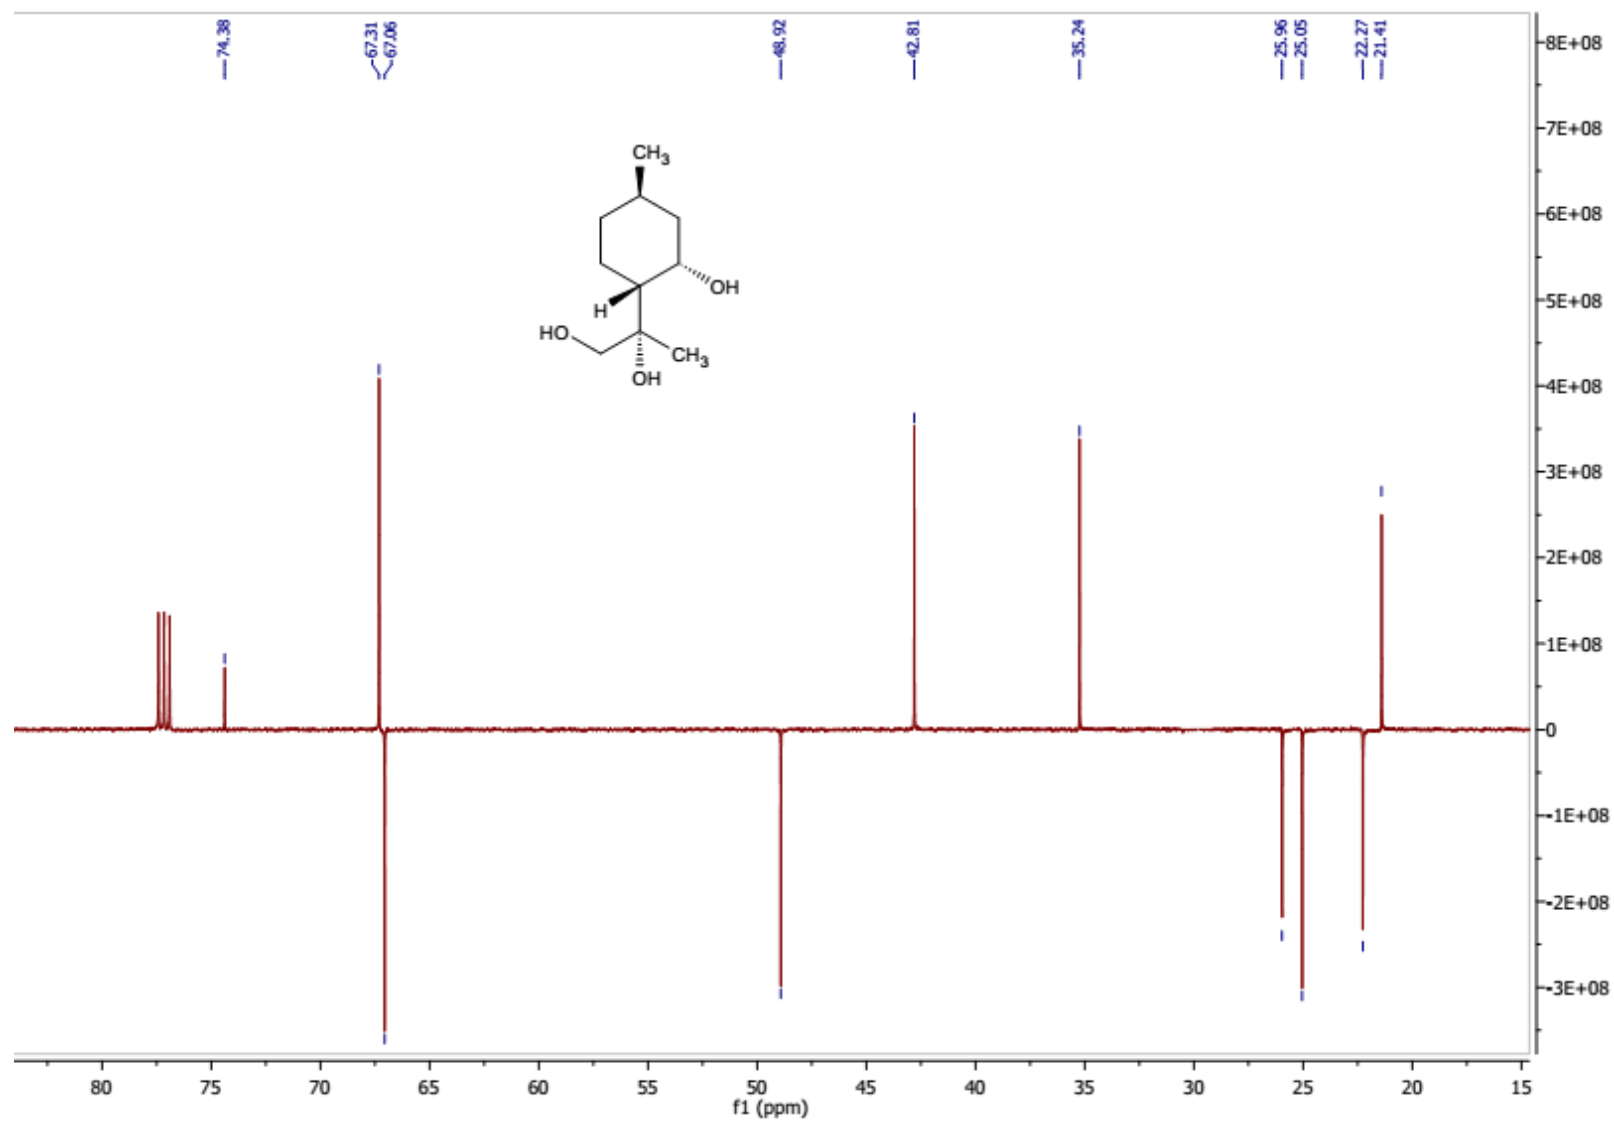

Chiral GC chromatogram of commercially available (-)-isopulegol (1)

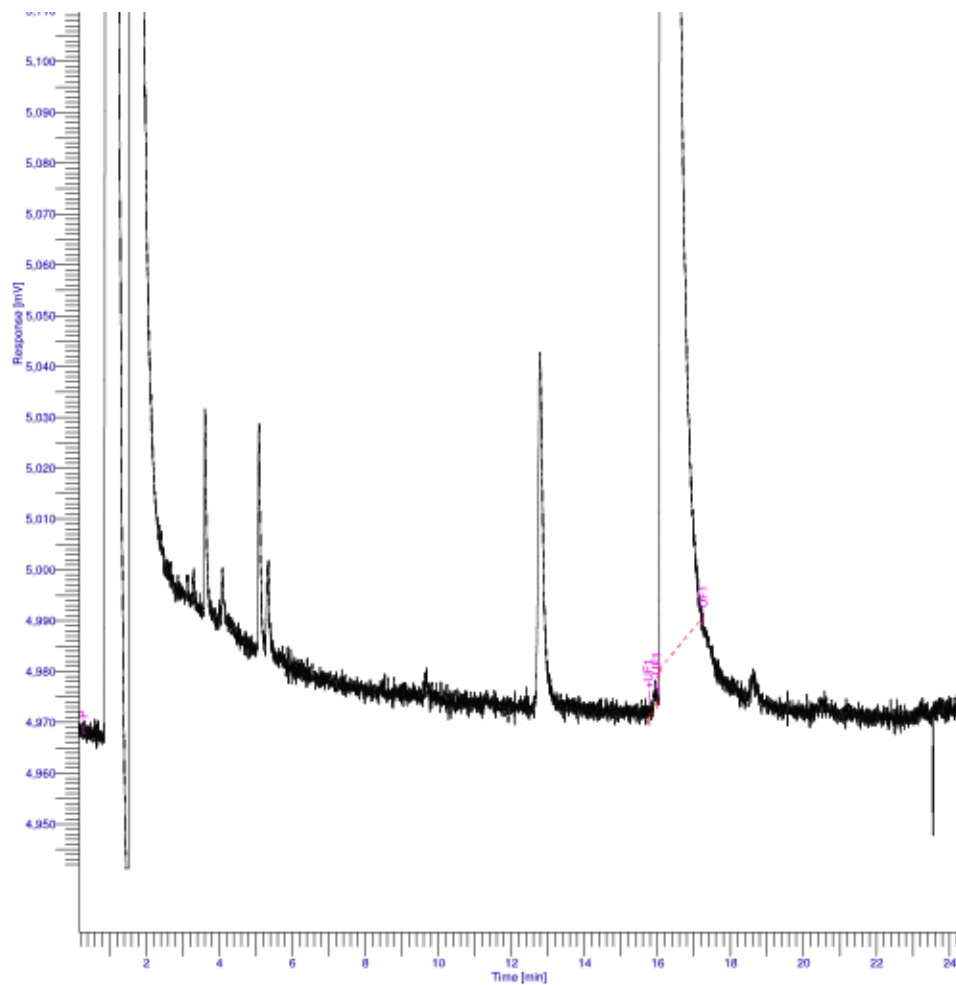

## DEFAULT REPORT

| Peak # | Time [min] | Area [μV·s] | Height [μV] | Area [%] | Norm. Area [%] | BL  | Area/Height [s] |
|--------|------------|-------------|-------------|----------|----------------|-----|-----------------|
| 1      | 15,943     | 13,96       | 4,39        | 0,07     | 0,07           | *MM | 3,1823          |
| 2      | 16,177     | 19423,27    | 919,14      | 99,93    | 99,93          | *MM | 21,1319         |
|        |            | 19437,23    | 923,53      | 100,00   | 100,00         |     |                 |

# Chiral GC chromatogram of commercially available (+)-isopulegol

Sample Name: E-GC-adamk-2isotipus-isopulegol.nw  
 Plateau: 05.14.14.04.15  
 Date: 2018.03.13.15.54:01  
 Method: 1.1 mV  
 Start Time: 5.10 min End Time: 19.55 min Low Point: 4.91 mV High Point: 5.89 mV  
 Plot Offset: 4.91 mV Plot Scale: 1.1 mV

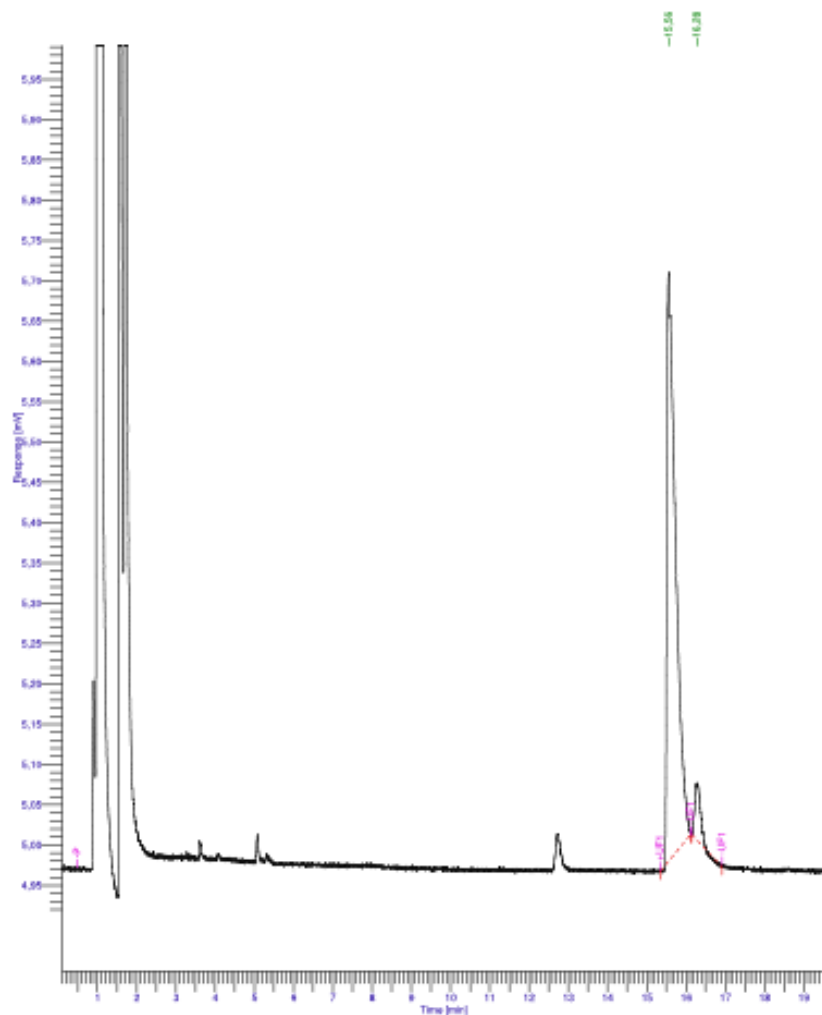

## DEFAULT REPORT

| Peak # | Time [min] | Area [μV·s] | Height [μV] | Area [%] | Norm. Area [%] | BL  | Area/Height [s] |
|--------|------------|-------------|-------------|----------|----------------|-----|-----------------|
| 1      | 15,564     | 11359,73    | 729,80      | 93,88    | 93,88          | *MM | 15,5655         |
| 2      | 16,277     | 740,74      | 70,60       | 6,12     | 6,12           | *MM | 10,4920         |
|        |            | 12100,47    | 800,40      | 100,00   | 100,00         |     |                 |
